# Supplementary material for: Global epidemiology of systemic lupus erythematosus: a comprehensive systematic analysis and modelling study
Source: PubMed Central journal article supplement — Ann Rheum Dis. 2022 Oct 14;82(3):351–6. doi: 10.1136/ard-2022-223035 (PMC9933169; doi:10.1136/ard-2022-223035), 2022-10-14
Supplement: ard-2022-223035supp001.pdf [file ard-2022-223035supp001.pdf]

## SUPPLEMENTARY MATERIAL 1

**The global epidemiology of systemic lupus erythematosus: a comprehensive systematic analysis and modelling study**

Jingru Tian<sup>1,2,3</sup>, Dingyao Zhang<sup>4,5</sup>, Xu Yao<sup>1</sup>, Yaqing Huang<sup>6</sup>, and Qianjin Lu<sup>1,2,3\*</sup>

<sup>1</sup>Institute of Dermatology, Chinese Academy of Medical Sciences and Peking Union Medical College, Nanjing, China

<sup>2</sup>Key Laboratory of Basic and Translational Research on Immune-Mediated Skin Diseases, Chinese Academy of Medical Sciences, Nanjing, China

<sup>3</sup>Jiangsu Key Laboratory of Molecular Biology for Skin Diseases and STIs, Nanjing, China

<sup>4</sup>Graduate Program in Biological and Biomedical Sciences, Yale University, New Haven, USA

<sup>5</sup>Program in Computational Biology and Bioinformatics, Yale University, New Haven, USA

<sup>6</sup>Department of Pathology, Yale University, New Haven, USA

\* Correspondence should be addressed to:

Qianjin Lu, 12 Jiangwangmiao Street, Xuanwu, Nanjing, Jiangsu, China 210042.

Telephone: 025-85478999; Fax: 025-85414477;

Email: qianlu5860@pumcdern.cams.cn

## **Appendices index**

|                                                                                           |           |
|-------------------------------------------------------------------------------------------|-----------|
| <b>Appendix 1 Detailed methods .....</b>                                                  | <b>3</b>  |
| <b>Appendix 2 Search strategy .....</b>                                                   | <b>5</b>  |
| <b>Appendix 3 Literature search and selection.....</b>                                    | <b>7</b>  |
| <b>Appendix 4 Characteristics of studies reporting on incidence of AD.....</b>            | <b>8</b>  |
| <b>Appendix 5 Quality assessment of studies using the AXIS tool .....</b>                 | <b>50</b> |
| <b>Appendix 6 Countries and territories in analysis regions .....</b>                     | <b>55</b> |
| <b>Appendix 7 Statistical methods for incidence and prevalence calculation.....</b>       | <b>57</b> |
| <b>Appendix 8 Trace plots for covariates in the Bayesian multilevel model .....</b>       | <b>59</b> |
| <b>Appendix 9 Subgroup analysis of classification criteria and diagnostic method.....</b> | <b>61</b> |
| <b>Appendix 10 Validate the accuracy of the Bayesian model .....</b>                      | <b>64</b> |

## Definitions and analytic framework

We performed a systematic review and meta-analysis of the incidence and prevalence of systemic lupus erythematosus (SLE). Incidence data were summarized descriptively, whereas using prevalence data we generated global, regional, and country-specific estimates of the prevalence of the disease for 2022.

The study was carried out according to the following main steps:

- Descriptive summary of incidence and prevalence data.
- Development of a hierarchical model to estimate the global, regional, and country-specific prevalence and incidence of SLE.

## Appendix 1 Detailed methods

### a. Search strategy

Two investigators (JR.T and DY.Z) systematically searched four electronic (MEDLINE, EMBASE, Web of Science, and China National Knowledge Infrastructure) from January 1, 1992 to May 7, 2022, appraised studies on eligibility, and extracted data independently. Data extracted from each study included citation data (title of the study, authors, publication year); study period; study population (country, ethnicity, age group, sex); study methods (diagnostic method (dermatologists, physician or self-reported); outcome measure (incidence and/or prevalence); type of prevalence (point, period or life-time); and findings (number of people with SLE, values of the prevalence and/or incidence reported and their 95% confidence intervals (CIs)). Discrepancies were discussed and agreed by consensus.

The MeSH and keyword search terms associated with SLE were used in each database. In order not to miss out on potentially useful articles, references cited in relevant reviews were also searched manually.

### b. Study selection

We evaluated published articles at the title or abstract level, with divergences resolved after consensus by two independent investigators. If potentially relevant, we evaluated them as complete reports according to prespecified selection criteria. Studies from any country in the world and/or in any language were included if they met

the inclusion criteria. No restriction on the type of population regarding age, sex, and severity of SLE or regarding type of diagnosis (self-reported, physician diagnosis or dermatologist diagnosis) was applied. We excluded studies which are: 1) non-human studies; 2) not cross-sectional surveys or cohorts of representative (general) populations of a country or area of a country; 3) were not carried out on the general population (i.e. people were identified from specific populations such as department of rheumatology or dermatology clinics, or specific subgroups of the population); 4) focused only on comorbidities of SLE; 5) no clear definition of SLE, or combined with other autoimmune diseases. In addition, published articles which are: 1) without full text (i.e. abstracts and conference proceedings) or not reporting original studies (i.e. narrative reviews, meta-analyses, editorials, commentaries, protocols, guidelines, or perspectives); or 2) duplicate reports were also excluded. The search process of literature from published articles were shown below.

### **c. Quality Assessment**

A formal assessment of the quality of the included studies was performed independently by two investigators (JR.T and DY.Z) using the Appraisal tool of Cross-Sectional Studies (AXIS tool). The AXIS tool is a 20-item quality assessment tool designed to assist researchers to critically appraise studies, specifically in the process of conducting systemic reviews. The 20-items cover the following domains: identification of research aims, appropriateness of study design, use of valid measures and statistical analyses and consideration of bias. In the current systematic review, studies were classified as having high, medium, or low risk of bias or unclear according to the overall quality of the methods used and reporting of results in the study. The risk of bias assessment for individual studies was included in Table S8.

## Appendix 2 Search strategies

**Table S1. The search strategy in PubMed (Medline)**

| # | Terms                                                                                                                                                                                                                                                                                                                                                                                                                                                                  | Quotes    |
|---|------------------------------------------------------------------------------------------------------------------------------------------------------------------------------------------------------------------------------------------------------------------------------------------------------------------------------------------------------------------------------------------------------------------------------------------------------------------------|-----------|
| 4 | #1 AND #2 NOT #3                                                                                                                                                                                                                                                                                                                                                                                                                                                       | 20.188    |
| 3 | animals [mh] NOT humans [mh]                                                                                                                                                                                                                                                                                                                                                                                                                                           | 5.002.462 |
| 2 | ((incidence or incident) OR (exp Incidence/) OR (incidence stud*) OR (cohort stud*) OR (exp Cohort Studies/) OR (exp Follow-Up Studies/) OR (follow-up stud*) OR (prospective stud*) OR (exp Prospective Studies/) OR (longitudinal stud*) OR (exp Longitudinal Studies/) OR ((epidemiol* SLEj stud*)) OR (exp Epidemiologic Studies/) OR (exp Epidemiology/) OR (exp Prevalence/) OR (prevalence stud*) OR (exp Cross-Sectional Studies/) OR (cross-sectional stud*)) | 5.958.181 |
| 1 | ("Lupus Erythematosus, Systemic"[Mesh] OR Systemic Lupus Erythematosus OR Lupus Erythematosus Disseminatus OR Libman-Sacks Disease OR Disease, Libman-Sacks OR Libman Sacks Disease) OR ("Lupus Nephritis"[Mesh] OR Lupus Glomerulonephritis OR Nephritis, Lupus OR Lupus Nephritides OR Nephritides, Lupus OR Glomerulonephritis, Lupus OR Glomerulonephritides, Lupus OR Lupus Glomerulonephritides) OR (systemic lupus erythematosus))                              | 81.475    |

**Table S2. The search strategy in Embase**

| # | Terms                                                                                                                                                                                                                                                                                                                                                                                                                                                                                                            | Quotes    |
|---|------------------------------------------------------------------------------------------------------------------------------------------------------------------------------------------------------------------------------------------------------------------------------------------------------------------------------------------------------------------------------------------------------------------------------------------------------------------------------------------------------------------|-----------|
| 3 | #1 AND #2 AND [humans]/lim                                                                                                                                                                                                                                                                                                                                                                                                                                                                                       | 6.044     |
| 2 | 'Incidence'/exp OR 'Cohort Studies'/exp OR 'incidence or incident':ti,ab,kw OR 'incidence stud*':ti,ab,kw OR 'cohort stud*':ti,ab,kw OR 'Follow-Up Studies'/exp OR 'follow-up stud*' OR 'prospective stud*' OR 'Prospective Studies'/exp OR 'longitudinal stud*' OR 'Longitudinal Studies'/exp OR 'epidemiol* SLEj stud*' OR 'Epidemiologic Studies'/exp OR 'Epidemiology'/exp OR 'prevalence or prevalen' OR 'Prevalence'/exp OR 'prevalence stud*' OR 'Cross-Sectional Studies'/exp OR 'cross-sectional stud*' | 6.403.284 |
| 1 | ('lupus erythematosus nephritis'/exp OR 'glomerulonephritis lupoid' OR 'lupoid nephritis' OR 'lupus erythematosus nephritis' OR 'lupus glomerulonephritis' OR 'lupus kidney' OR 'lupus nephritis' OR 'lupus nephropathy' OR 'nephritis lupus erythematosus' OR 'nephritis systemic lupus erythematosus' OR 'systemic lupus erythematosus, nephritis') AND [embase]/lim                                                                                                                                           | 19.482    |

**Table S3. Web of Science search (contain Web of Science Core Collection; MEDLINE; Current Contents Connect; SciELO Citation Index; Data Citation Index; and KCI-Korean Journal Database)**

| # | Terms                                                                             | Quotes    |
|---|-----------------------------------------------------------------------------------|-----------|
| 1 | TS=(incidence OR incident)                                                        | 1.967.954 |
| 2 | TS=(incidence study or incidence studies)                                         | 1.012.097 |
| 3 | TS=(cohort study or cohort studies)                                               | 981.405   |
| 4 | TS=(follow-up study or follow-up studies or follow up study or follow up studies) | 1.894.102 |
| 5 | TS=(prospective study or prospective studies)                                     | 1.023.716 |
| 6 | TS=(longitudinal study or longitudinal studies)                                   | 505.799   |
| 7 | TS=(epidemiolo* study or epidemiolo* studies)                                     | 2.204.540 |

|           |                                                                                                           |                  |
|-----------|-----------------------------------------------------------------------------------------------------------|------------------|
| <b>8</b>  | TS=(epidemiology)                                                                                         | <b>2.734.018</b> |
| <b>9</b>  | TS=(prevalence OR prevalent)                                                                              | <b>1.679.733</b> |
| <b>10</b> | TS=(prevalence study or prevalence studies)                                                               | <b>1.140.594</b> |
| <b>11</b> | TS=(cross-sectional study OR cross-sectional studies OR cross sectional study OR cross sectional studies) | <b>712.847</b>   |
| <b>12</b> | #1 OR #2 OR #3 OR #4 OR #5 OR #6 OR #7 OR #8 OR #9 OR #10 OR #11                                          | <b>7.963.989</b> |
| <b>13</b> | TS=(lupus erythematosus, systemic)                                                                        | <b>145.435</b>   |
| <b>14</b> | TS=(lupus nephritis)                                                                                      | <b>26.576</b>    |
| <b>15</b> | TS=(lupus)                                                                                                | <b>199.364</b>   |
| <b>16</b> | TS=(lupus vasculitis)                                                                                     | <b>14.108</b>    |
| <b>17</b> | TS=(lupus erythematosus)                                                                                  | <b>157.590</b>   |
| <b>18</b> | TS=(systemic lupus erythematosus)                                                                         | <b>2.318</b>     |
| <b>19</b> | TS=(systemic lupus erythematosus)                                                                         | <b>1.810</b>     |
| <b>20</b> | TS=(systemic lupus erythematosus)                                                                         | <b>145.435</b>   |
| <b>21</b> | TS=(lupus erythematosus visceralis)                                                                       | <b>91</b>        |
| <b>22</b> | #13 OR #14 OR #15 OR #16 OR #17 OR #18 OR #19 OR #20 OR #21                                               | <b>199.364</b>   |
| <b>23</b> | #22 and #12                                                                                               | <b>37.220</b>    |

**Table S4. The search strategy in China National Knowledge Infrastructure (CNKI)**

| <b>#</b> | <b>Terms</b>                            | <b>Quotes</b>  |
|----------|-----------------------------------------|----------------|
| <b>1</b> | Incidence OR epidemiology OR prevalence | <b>499.292</b> |
| <b>2</b> | Systemic lupus erythematosus            | <b>23.061</b>  |
| <b>3</b> | #1 AND #2                               | <b>191</b>     |

**Appendix 3 Literature search and selection****Figure S1. Literature search and selection from published articles**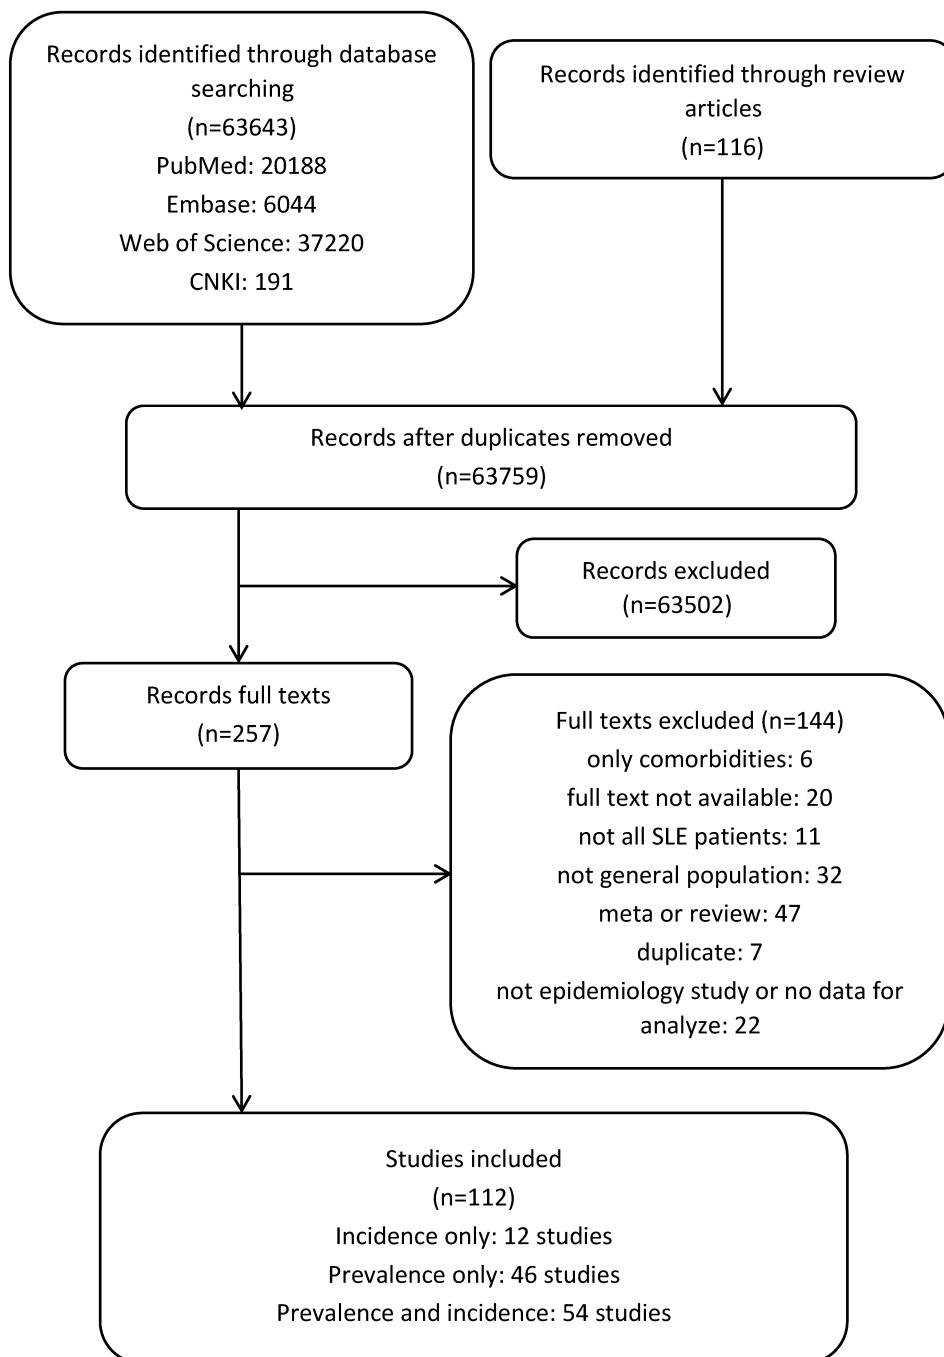

#### Appendix 4 Characteristics of studies reporting on incidence of AD.

**Table S5. The Appraisal tool of Cross-Sectional Studies (AXIS tool)**

|                     | Question                                                                                                                                              | Yes | No | Don't know/<br>Comment |
|---------------------|-------------------------------------------------------------------------------------------------------------------------------------------------------|-----|----|------------------------|
| <b>Introduction</b> |                                                                                                                                                       |     |    |                        |
| 1                   | Were the aims/objectives of the study clear?                                                                                                          |     |    |                        |
| <b>Methods</b>      |                                                                                                                                                       |     |    |                        |
| 2                   | Was the study design appropriate for the stated aim(s)?                                                                                               |     |    |                        |
| 3                   | Was the sample size justified?                                                                                                                        |     |    |                        |
| 4                   | Was the target/reference population clearly defined? (Is it clear who the research was about?)                                                        |     |    |                        |
| 5                   | Was the sample frame taken from an appropriate population base so that it closely represented the target/reference population under investigation?    |     |    |                        |
| 6                   | Was the selection process likely to select subjects/participants that were representative of the target/reference population under investigation?     |     |    |                        |
| 7                   | Were measures undertaken to address and categorise non-responders?                                                                                    |     |    |                        |
| 8                   | Were the risk factor and outcome variables measured appropriate to the aims of the study?                                                             |     |    |                        |
| 9                   | Were the risk factor and outcome variables measured correctly using instruments/measurements that had been trialled, piloted or published previously? |     |    |                        |
| 10                  | Is it clear what was used to determine statistical significance and/or precision estimates? (e.g. p-values, confidence intervals)                     |     |    |                        |
| 11                  | Were the methods (including statistical methods) sufficiently described to enable them to be repeated?                                                |     |    |                        |
| <b>Results</b>      |                                                                                                                                                       |     |    |                        |
| 12                  | Were the basic data adequately described?                                                                                                             |     |    |                        |
| 13                  | Does the response rate raise concerns about non-response bias?                                                                                        |     |    |                        |
| 14                  | If appropriate, was information about non-responders described?                                                                                       |     |    |                        |
| 15                  | Were the results internally consistent?                                                                                                               |     |    |                        |
| 16                  | Were the results presented for all the analyses described in the methods?                                                                             |     |    |                        |
| <b>Discussion</b>   |                                                                                                                                                       |     |    |                        |
| 17                  | Were the authors' discussions and conclusions justified by the results?                                                                               |     |    |                        |
| 18                  | Were the limitations of the study discussed?                                                                                                          |     |    |                        |
| <b>Other</b>        |                                                                                                                                                       |     |    |                        |
| 19                  | Were there any funding sources or conflicts of interest that may affect the authors' interpretation of the results?                                   |     |    |                        |
| 20                  | Was ethical approval or consent of participants attained?                                                                                             |     |    |                        |



**Table S6. Characteristics of studies reporting on incidence of AD.**

| No. | Study                        | Study time | Incidence       | Country   | Reference                                                                                                                                                                                                                                                                                                                                                                                                                                                                                     |
|-----|------------------------------|------------|-----------------|-----------|-----------------------------------------------------------------------------------------------------------------------------------------------------------------------------------------------------------------------------------------------------------------------------------------------------------------------------------------------------------------------------------------------------------------------------------------------------------------------------------------------|
| 45  | Gonzalez Lucero et al., 2020 | 2005-2012  | Incidence (ACR) | Argentina | Gonzalez Lucero L, Barbaglia AL, Bellomio VI, Bertolaccini MC, Machado Escobar MA, Sueldo HR, Yacuzzi MS, Carrizo GA, Robles N, Rengel S, Cristofari A, Leal MO, Vasquez DL, Quinteros A, Seleme G, Molina MJ, Pera OL, Dip R, Olea AC, Torres AY, Espindola Echazu M, Arquez G, Lazaro H, Colombres F, Juarez LA, Romano O, Paz S, Santana M, Galindo L, Lucero E. Prevalence and incidence of systemic lupus erythematosus in Tucumán, Argentina. <i>Lupus</i> . 2020 Nov;29(13):1815-1820. |
| 98  | Scolnik et al., 2014         | 1998-2009  | Incidence (ACR) | Argentina | Scolnik M, Marin J, Valeiras SM, Marchese MF, Talani AS, Avellaneda NL, Etchepare A, Etchepare P, Plou MS, Soriano ER. Incidence and prevalence of lupus in Buenos Aires, Argentina: a 11-year health management organisation-based study. <i>Lupus Sci Med</i> . 2014 Jun 5;1(1):e000021.                                                                                                                                                                                                    |
| 65  | Mackie et al., 2015          | 2009-2011  | Incidence (ACR) | Australia | Mackie FE, Kainer G, Adib N, Boros C, Elliott EJ, Fahy R, Munro J, Murray K, Rosenberg A, Wainstein B, Ziegler JB, Singh-Grewal D. The national incidence and clinical picture of SLE in children in Australia - a report from the Australian Paediatric Surveillance Unit. <i>Lupus</i> . 2015 Jan;24(1):66-73.                                                                                                                                                                              |
| 111 | Anstey et al., 1993          | 1991       | Incidence (ARA) | Australia | Anstey NM, Bastian I, Dunckley H, Currie BJ. Systemic lupus erythematosus in Australian aborigines: high prevalence, morbidity and mortality. <i>Aust N Z J Med</i> . 1993 Dec;23(6):646-51.                                                                                                                                                                                                                                                                                                  |
| 42  | Flower et al., 2012          | 2000-2009  | Incidence (ACR) | Barbados  | Flower C, Hennis AJ, Hambleton IR, Nicholson GD, Liang MH; Barbados National Lupus Registry Group. Systemic lupus erythematosus in an African Caribbean population: incidence, clinical manifestations, and survival in the Barbados National Lupus Registry. <i>Arthritis Care Res (Hoboken)</i> . 2012 Aug;64(8):1151-8.                                                                                                                                                                    |
| 70  | Molokhia et al., 2001        | 2007-2008  | Incidence (ACR) | Brazil    | Molokhia M, McKeigue PM, Cuadrado M, Hughes G. Systemic lupus erythematosus in migrants from west Africa compared with Afro-Caribbean people in the UK. <i>Lancet</i> . 2001 May 5;357(9266):1414-5.                                                                                                                                                                                                                                                                                          |
| 87  | Vilar et al., 2002           | 2000       | Incidence (ACR) | Brazil    | Vilar MJ, Sato EI. Estimating the incidence of systemic lupus erythematosus in a tropical region (Natal, Brazil). <i>Lupus</i> . 2002;11(8):528-32.                                                                                                                                                                                                                                                                                                                                           |

|    |                        |           |           |        |                                                                                                                                                                                                                                                                                                       |
|----|------------------------|-----------|-----------|--------|-------------------------------------------------------------------------------------------------------------------------------------------------------------------------------------------------------------------------------------------------------------------------------------------------------|
| 10 | Bernatsky et al., 2007 | 1994-2003 | Incidence | Canada | Bernatsky S, Joseph L, Pineau CA, Tamblyn R, Feldman DE, Clarke AE. A population-based assessment of systemic lupus erythematosus incidence and prevalence--results and implications of using administrative data for epidemiological studies. <i>Rheumatology (Oxford)</i> . 2007 Dec;46(12):1814-8. |
| 38 | Fatoye et al., 2018    | 2000-2015 | Incidence | Canada | Fatoye F, Gebrye T, Svenson LW. Real-world incidence and prevalence of systemic lupus erythematosus in Alberta, Canada. <i>Rheumatol Int</i> . 2018 Sep;38(9):1721-1726.                                                                                                                              |
| 73 | Ng et al., 2013        | 2001      | Incidence | Canada | Ng R, Bernatsky S, Rahme E. Observation period effects on estimation of systemic lupus erythematosus incidence and prevalence in Quebec. <i>J Rheumatol</i> . 2013 Aug;40(8):1334-6.                                                                                                                  |
| 13 | Chiu et al., 2010      | 2001      | Incidence | China  | Chiu YM, Lai CH. Nationwide population-based epidemiologic study of systemic lupus erythematosus in Taiwan. <i>Lupus</i> . 2010 Sep;19(10):1250-5.                                                                                                                                                    |
| 13 | Chiu et al., 2010      | 2002      | Incidence | China  | Chiu YM, Lai CH. Nationwide population-based epidemiologic study of systemic lupus erythematosus in Taiwan. <i>Lupus</i> . 2010 Sep;19(10):1250-5.                                                                                                                                                    |
| 13 | Chiu et al., 2010      | 2003      | Incidence | China  | Chiu YM, Lai CH. Nationwide population-based epidemiologic study of systemic lupus erythematosus in Taiwan. <i>Lupus</i> . 2010 Sep;19(10):1250-5.                                                                                                                                                    |
| 13 | Chiu et al., 2010      | 2004      | Incidence | China  | Chiu YM, Lai CH. Nationwide population-based epidemiologic study of systemic lupus erythematosus in Taiwan. <i>Lupus</i> . 2010 Sep;19(10):1250-5.                                                                                                                                                    |
| 13 | Chiu et al., 2010      | 2005      | Incidence | China  | Chiu YM, Lai CH. Nationwide population-based epidemiologic study of systemic lupus erythematosus in Taiwan. <i>Lupus</i> . 2010 Sep;19(10):1250-5.                                                                                                                                                    |
| 13 | Chiu et al., 2010      | 2006      | Incidence | China  | Chiu YM, Lai CH. Nationwide population-based epidemiologic study of systemic lupus erythematosus in Taiwan. <i>Lupus</i> . 2010 Sep;19(10):1250-5.                                                                                                                                                    |
| 13 | Chiu et al., 2010      | 2007      | Incidence | China  | Chiu YM, Lai CH. Nationwide population-based epidemiologic study of systemic lupus erythematosus in Taiwan. <i>Lupus</i> . 2010 Sep;19(10):1250-5.                                                                                                                                                    |
| 61 | Leong et al., 2021     | 2003      | Incidence | China  | Leong PY, Huang JY, Chiou JY, Bai YC, Wei JC. The prevalence and incidence of systemic lupus erythematosus in Taiwan: a nationwide population-based study. <i>Sci Rep</i> . 2021 Mar 11;11(1):5631.                                                                                                   |

|    |                    |      |           |       |                                                                                                                                                                                                    |
|----|--------------------|------|-----------|-------|----------------------------------------------------------------------------------------------------------------------------------------------------------------------------------------------------|
| 61 | Leong et al., 2021 | 2004 | Incidence | China | Leong PY, Huang JY, Chiou JY, Bai YC, Wei JC. The prevalence and incidence of systemic lupus erythematosus in Taiwan: a nationwide population-based study. <i>Sci Rep.</i> 2021 Mar 11;11(1):5631. |
| 61 | Leong et al., 2021 | 2005 | Incidence | China | Leong PY, Huang JY, Chiou JY, Bai YC, Wei JC. The prevalence and incidence of systemic lupus erythematosus in Taiwan: a nationwide population-based study. <i>Sci Rep.</i> 2021 Mar 11;11(1):5631. |
| 61 | Leong et al., 2021 | 2006 | Incidence | China | Leong PY, Huang JY, Chiou JY, Bai YC, Wei JC. The prevalence and incidence of systemic lupus erythematosus in Taiwan: a nationwide population-based study. <i>Sci Rep.</i> 2021 Mar 11;11(1):5631. |
| 61 | Leong et al., 2021 | 2007 | Incidence | China | Leong PY, Huang JY, Chiou JY, Bai YC, Wei JC. The prevalence and incidence of systemic lupus erythematosus in Taiwan: a nationwide population-based study. <i>Sci Rep.</i> 2021 Mar 11;11(1):5631. |
| 61 | Leong et al., 2021 | 2008 | Incidence | China | Leong PY, Huang JY, Chiou JY, Bai YC, Wei JC. The prevalence and incidence of systemic lupus erythematosus in Taiwan: a nationwide population-based study. <i>Sci Rep.</i> 2021 Mar 11;11(1):5631. |
| 61 | Leong et al., 2021 | 2009 | Incidence | China | Leong PY, Huang JY, Chiou JY, Bai YC, Wei JC. The prevalence and incidence of systemic lupus erythematosus in Taiwan: a nationwide population-based study. <i>Sci Rep.</i> 2021 Mar 11;11(1):5631. |
| 61 | Leong et al., 2021 | 2010 | Incidence | China | Leong PY, Huang JY, Chiou JY, Bai YC, Wei JC. The prevalence and incidence of systemic lupus erythematosus in Taiwan: a nationwide population-based study. <i>Sci Rep.</i> 2021 Mar 11;11(1):5631. |
| 61 | Leong et al., 2021 | 2011 | Incidence | China | Leong PY, Huang JY, Chiou JY, Bai YC, Wei JC. The prevalence and incidence of systemic lupus erythematosus in Taiwan: a nationwide population-based study. <i>Sci Rep.</i> 2021 Mar 11;11(1):5631. |
| 91 | Yeh et al., 2013   | 2003 | Incidence | China | Yeh KW, Yu CH, Chan PC, Horng JT, Huang JL. Burden of systemic lupus erythematosus in Taiwan: a population-based survey. <i>Rheumatol Int.</i> 2013 Jul;33(7):1805-11.                             |

|     |                        |           |                 |         |                                                                                                                                                                                                                         |
|-----|------------------------|-----------|-----------------|---------|-------------------------------------------------------------------------------------------------------------------------------------------------------------------------------------------------------------------------|
| 91  | Yeh et al., 2013       | 2004      | Incidence       | China   | Yeh KW, Yu CH, Chan PC, Horng JT, Huang JL. Burden of systemic lupus erythematosus in Taiwan: a population-based survey. <i>Rheumatol Int.</i> 2013 Jul;33(7):1805-11.                                                  |
| 91  | Yeh et al., 2013       | 2005      | Incidence       | China   | Yeh KW, Yu CH, Chan PC, Horng JT, Huang JL. Burden of systemic lupus erythematosus in Taiwan: a population-based survey. <i>Rheumatol Int.</i> 2013 Jul;33(7):1805-11.                                                  |
| 91  | Yeh et al., 2013       | 2006      | Incidence       | China   | Yeh KW, Yu CH, Chan PC, Horng JT, Huang JL. Burden of systemic lupus erythematosus in Taiwan: a population-based survey. <i>Rheumatol Int.</i> 2013 Jul;33(7):1805-11.                                                  |
| 91  | Yeh et al., 2013       | 2007      | Incidence       | China   | Yeh KW, Yu CH, Chan PC, Horng JT, Huang JL. Burden of systemic lupus erythematosus in Taiwan: a population-based survey. <i>Rheumatol Int.</i> 2013 Jul;33(7):1805-11.                                                  |
| 91  | Yeh et al., 2013       | 2008      | Incidence       | China   | Yeh KW, Yu CH, Chan PC, Horng JT, Huang JL. Burden of systemic lupus erythematosus in Taiwan: a population-based survey. <i>Rheumatol Int.</i> 2013 Jul;33(7):1805-11.                                                  |
| 112 | Mok et al., 2008       | 2000      | Incidence (ACR) | China   | Mok CC, To CH, Ho LY, Yu KL. Incidence and mortality of systemic lupus erythematosus in a southern Chinese population, 2000-2006. <i>J Rheumatol.</i> 2008 Oct;35(10):1978-82.                                          |
| 112 | Mok et al., 2008       | 2006      | Incidence (ACR) | China   | Mok CC, To CH, Ho LY, Yu KL. Incidence and mortality of systemic lupus erythematosus in a southern Chinese population, 2000-2006. <i>J Rheumatol.</i> 2008 Oct;35(10):1978-82.                                          |
| 48  | Hermansen et al., 2016 | 1995-2011 | Incidence       | Denmark | Hermansen ML, Lindhardtsen J, Torp-Pedersen C, Faurschou M, Jacobsen S. Incidence of Systemic Lupus Erythematosus and Lupus Nephritis in Denmark: A Nationwide Cohort Study. <i>J Rheumatol.</i> 2016 Jul;43(7):1335-9. |
| 60  | Lastrup et al., 2009   | 1995      | Incidence (ACR) | Denmark | Lastrup H, Voss A, Green A, Junker P. Occurrence of systemic lupus erythematosus in a Danish community: an 8-year prospective study. <i>Scand J Rheumatol.</i> 2009 Mar-Apr;38(2):128-32.                               |

|    |                      |           |                 |         |                                                                                                                                                                                                                              |
|----|----------------------|-----------|-----------------|---------|------------------------------------------------------------------------------------------------------------------------------------------------------------------------------------------------------------------------------|
| 60 | Lastrup et al., 2009 | 1996      | Incidence (ACR) | Denmark | Lastrup H, Voss A, Green A, Junker P. Occurrence of systemic lupus erythematosus in a Danish community: an 8-year prospective study. <i>Scand J Rheumatol.</i> 2009 Mar-Apr;38(2):128-32.                                    |
| 60 | Lastrup et al., 2009 | 1997      | Incidence (ACR) | Denmark | Lastrup H, Voss A, Green A, Junker P. Occurrence of systemic lupus erythematosus in a Danish community: an 8-year prospective study. <i>Scand J Rheumatol.</i> 2009 Mar-Apr;38(2):128-32.                                    |
| 60 | Lastrup et al., 2009 | 1998      | Incidence (ACR) | Denmark | Lastrup H, Voss A, Green A, Junker P. Occurrence of systemic lupus erythematosus in a Danish community: an 8-year prospective study. <i>Scand J Rheumatol.</i> 2009 Mar-Apr;38(2):128-32.                                    |
| 60 | Lastrup et al., 2009 | 1999      | Incidence (ACR) | Denmark | Lastrup H, Voss A, Green A, Junker P. Occurrence of systemic lupus erythematosus in a Danish community: an 8-year prospective study. <i>Scand J Rheumatol.</i> 2009 Mar-Apr;38(2):128-32.                                    |
| 60 | Lastrup et al., 2009 | 2000      | Incidence (ACR) | Denmark | Lastrup H, Voss A, Green A, Junker P. Occurrence of systemic lupus erythematosus in a Danish community: an 8-year prospective study. <i>Scand J Rheumatol.</i> 2009 Mar-Apr;38(2):128-32.                                    |
| 60 | Lastrup et al., 2009 | 2001      | Incidence (ACR) | Denmark | Lastrup H, Voss A, Green A, Junker P. Occurrence of systemic lupus erythematosus in a Danish community: an 8-year prospective study. <i>Scand J Rheumatol.</i> 2009 Mar-Apr;38(2):128-32.                                    |
| 60 | Lastrup et al., 2009 | 2002      | Incidence (ACR) | Denmark | Lastrup H, Voss A, Green A, Junker P. Occurrence of systemic lupus erythematosus in a Danish community: an 8-year prospective study. <i>Scand J Rheumatol.</i> 2009 Mar-Apr;38(2):128-32.                                    |
| 75 | Otsa et al., 2017    | 2006-2010 | Incidence (ACR) | Estonia | Otsa K, Talli S, Harding P, Parsik E, Esko M, Teepere A, Tammaru M. Prevalence and incidence of systemic lupus erythematosus in the adult population of Estonia. <i>Lupus.</i> 2017 Sep;26(10):1115-1120.                    |
| 37 | Elfving et al., 2014 | 2000-2007 | Incidence       | Finland | Elfving P, Puolakka K, Kautiainen H, Virta LJ, Pohjolainen T, Kaipainen-Seppänen O. Incidence of systemic lupus erythematosus in Finland, 2000-2007, a nationwide study. <i>Clin Exp Rheumatol.</i> 2014 Nov-Dec;32(6):953-5 |

|    |                         |           |                 |         |                                                                                                                                                                                                                                                                                    |
|----|-------------------------|-----------|-----------------|---------|------------------------------------------------------------------------------------------------------------------------------------------------------------------------------------------------------------------------------------------------------------------------------------|
| 37 | Elfving et al., 2014    | 2000-2007 | Incidence       | Finland | Elfving P, Puolakka K, Kautiainen H, Virta LJ, Pohjolainen T, Kaipainen-Seppänen O. Incidence of systemic lupus erythematosus in Finland, 2000-2007, a nationwide study. <i>Clin Exp Rheumatol</i> . 2014 Nov-Dec;32(6):953-5                                                      |
| 6  | Arnaud et al., 2014     | 2010      | Incidence       | France  | Arnaud L, Fagot JP, Mathian A, Paita M, Fagot-Campagna A, Amoura Z. Prevalence and incidence of systemic lupus erythematosus in France: a 2010 nation-wide population-based study. <i>Autoimmun Rev</i> . 2014 Nov;13(11):1082-9.                                                  |
| 36 | Deligny et al., 2002    | 1990-1999 | Incidence (ACR) | France  | Deligny C, Thomas L, Dubreuil F, Théodose C, Garsaud AM, Numéric P, Ranlin A, Jean-Baptiste G, Arfi S. Lupus systémique en Martinique: enquête épidémiologique [Systemic lupus erythematosus in Martinique: an epidemiologic study]. <i>Rev Med Interne</i> . 2002 Jan;23(1):21-9. |
| 2  | Schwarting et al., 2021 | 2009      | Incidence       | Germany | Schwarting A, Friedel H, Garal-Pantaler E, Pignot M, Wang X, Nab H, Desta B, Hammond ER. The Burden of Systemic Lupus Erythematosus in Germany: Incidence, Prevalence, and Healthcare Resource Utilization. <i>Rheumatol Ther</i> . 2021 Mar;8(1):375-393.                         |
| 2  | Schwarting et al., 2021 | 2010      | Incidence       | Germany | Schwarting A, Friedel H, Garal-Pantaler E, Pignot M, Wang X, Nab H, Desta B, Hammond ER. The Burden of Systemic Lupus Erythematosus in Germany: Incidence, Prevalence, and Healthcare Resource Utilization. <i>Rheumatol Ther</i> . 2021 Mar;8(1):375-393.                         |
| 2  | Schwarting et al., 2021 | 2011      | Incidence       | Germany | Schwarting A, Friedel H, Garal-Pantaler E, Pignot M, Wang X, Nab H, Desta B, Hammond ER. The Burden of Systemic Lupus Erythematosus in Germany: Incidence, Prevalence, and Healthcare Resource Utilization. <i>Rheumatol Ther</i> . 2021 Mar;8(1):375-393.                         |
| 2  | Schwarting et al., 2021 | 2012      | Incidence       | Germany | Schwarting A, Friedel H, Garal-Pantaler E, Pignot M, Wang X, Nab H, Desta B, Hammond ER. The Burden of Systemic Lupus Erythematosus in Germany: Incidence, Prevalence, and Healthcare Resource Utilization. <i>Rheumatol Ther</i> . 2021 Mar;8(1):375-393.                         |
| 2  | Schwarting et al., 2021 | 2013      | Incidence       | Germany | Schwarting A, Friedel H, Garal-Pantaler E, Pignot M, Wang X, Nab H, Desta B, Hammond ER. The Burden of Systemic Lupus Erythematosus in Germany:                                                                                                                                    |

|    |                         |           |                 |         |                                                                                                                                                                                                                                                                                                                                                                                          |
|----|-------------------------|-----------|-----------------|---------|------------------------------------------------------------------------------------------------------------------------------------------------------------------------------------------------------------------------------------------------------------------------------------------------------------------------------------------------------------------------------------------|
| 2  | Schwarting et al., 2021 | 2014      | Incidence       | Germany | Incidence, Prevalence, and Healthcare Resource Utilization. <i>Rheumatol Ther.</i> 2021 Mar;8(1):375-393.                                                                                                                                                                                                                                                                                |
| 94 | Brinks et al., 2016     | 2002      | Incidence       | Germany | Schwarting A, Friedel H, Garal-Pantaler E, Pignot M, Wang X, Nab H, Desta B, Hammond ER. The Burden of Systemic Lupus Erythematosus in Germany: Incidence, Prevalence, and Healthcare Resource Utilization. <i>Rheumatol Ther.</i> 2021 Mar;8(1):375-393.                                                                                                                                |
| 4  | Alamanos et al. 2003    | 1982-1986 | Incidence (ACR) | Greece  | Brinks R, Hoyer A, Weber S, Fischer-Betz R, Sander O, Richter JG, Chehab G, Schneider M. Age-specific and sex-specific incidence of systemic lupus erythematosus: an estimate from cross-sectional claims data of 2.3 million people in the German statutory health insurance 2002. <i>Lupus Sci Med.</i> 2016 Nov 25;3(1):e000181.                                                      |
| 4  | Alamanos et al. 2003    | 1987-1991 | Incidence (ACR) | Greece  | Alamanos Y, Voulgari PV, Siozos C, Katsimpri P, Tsintzos S, Dimou G, Politi EN, Rapti A, Laina G, Drosos AA. Epidemiology of systemic lupus erythematosus in northwest Greece 1982-2001. <i>J Rheumatol.</i> 2003 Apr;30(4):731-5.                                                                                                                                                       |
| 4  | Alamanos et al. 2003    | 1992-1996 | Incidence (ACR) | Greece  | Alamanos Y, Voulgari PV, Siozos C, Katsimpri P, Tsintzos S, Dimou G, Politi EN, Rapti A, Laina G, Drosos AA. Epidemiology of systemic lupus erythematosus in northwest Greece 1982-2001. <i>J Rheumatol.</i> 2003 Apr;30(4):731-5.                                                                                                                                                       |
| 4  | Alamanos et al. 2003    | 1997-2001 | Incidence (ACR) | Greece  | Alamanos Y, Voulgari PV, Siozos C, Katsimpri P, Tsintzos S, Dimou G, Politi EN, Rapti A, Laina G, Drosos AA. Epidemiology of systemic lupus erythematosus in northwest Greece 1982-2001. <i>J Rheumatol.</i> 2003 Apr;30(4):731-5.                                                                                                                                                       |
| 44 | Gergianaki et al., 2017 | 1999-2013 | Incidence (ACR) | Greece  | Alamanos Y, Voulgari PV, Siozos C, Katsimpri P, Tsintzos S, Dimou G, Politi EN, Rapti A, Laina G, Drosos AA. Epidemiology of systemic lupus erythematosus in northwest Greece 1982-2001. <i>J Rheumatol.</i> 2003 Apr;30(4):731-5.                                                                                                                                                       |
|    |                         |           |                 |         | Gergianaki I, Fanouriakis A, Repa A, Tzanakakis M, Adamichou C, Pompieri A, Spirou G, Bertsias A, Kabouraki E, Tzanakis I, Chatzi L, Sidiropoulos P, Boumpas DT, Bertsias GK. Epidemiology and burden of systemic lupus erythematosus in a Southern European population: data from the community-based lupus registry of Crete, Greece. <i>Ann Rheum Dis.</i> 2017 Dec;76(12):1992-2000. |

|    |                     |      |           |         |                                                                                                                                                                                                                                                                                |
|----|---------------------|------|-----------|---------|--------------------------------------------------------------------------------------------------------------------------------------------------------------------------------------------------------------------------------------------------------------------------------|
| 97 | Kedves et al., 2020 | 2010 | Incidence | Hungary | Kedves M, Kósa F, Kunovszki P, Takács P, Szabó MZ, Karyekar C, Lofland JH, Nagy G. Large-scale mortality gap between SLE and control population is associated with increased infection-related mortality in lupus. <i>Rheumatology (Oxford)</i> . 2020 Nov 1;59(11):3443-3451. |
| 97 | Kedves et al., 2020 | 2011 | Incidence | Hungary | Kedves M, Kósa F, Kunovszki P, Takács P, Szabó MZ, Karyekar C, Lofland JH, Nagy G. Large-scale mortality gap between SLE and control population is associated with increased infection-related mortality in lupus. <i>Rheumatology (Oxford)</i> . 2020 Nov 1;59(11):3443-3451. |
| 97 | Kedves et al., 2020 | 2012 | Incidence | Hungary | Kedves M, Kósa F, Kunovszki P, Takács P, Szabó MZ, Karyekar C, Lofland JH, Nagy G. Large-scale mortality gap between SLE and control population is associated with increased infection-related mortality in lupus. <i>Rheumatology (Oxford)</i> . 2020 Nov 1;59(11):3443-3451. |
| 97 | Kedves et al., 2020 | 2013 | Incidence | Hungary | Kedves M, Kósa F, Kunovszki P, Takács P, Szabó MZ, Karyekar C, Lofland JH, Nagy G. Large-scale mortality gap between SLE and control population is associated with increased infection-related mortality in lupus. <i>Rheumatology (Oxford)</i> . 2020 Nov 1;59(11):3443-3451. |
| 97 | Kedves et al., 2020 | 2014 | Incidence | Hungary | Kedves M, Kósa F, Kunovszki P, Takács P, Szabó MZ, Karyekar C, Lofland JH, Nagy G. Large-scale mortality gap between SLE and control population is associated with increased infection-related mortality in lupus. <i>Rheumatology (Oxford)</i> . 2020 Nov 1;59(11):3443-3451. |
| 97 | Kedves et al., 2020 | 2015 | Incidence | Hungary | Kedves M, Kósa F, Kunovszki P, Takács P, Szabó MZ, Karyekar C, Lofland JH, Nagy G. Large-scale mortality gap between SLE and control population is associated with increased infection-related mortality in lupus. <i>Rheumatology (Oxford)</i> . 2020 Nov 1;59(11):3443-3451. |
| 97 | Kedves et al., 2020 | 2016 | Incidence | Hungary | Kedves M, Kósa F, Kunovszki P, Takács P, Szabó MZ, Karyekar C, Lofland JH, Nagy G. Large-scale mortality gap between SLE and control population is associated with increased infection-related mortality in lupus. <i>Rheumatology (Oxford)</i> . 2020 Nov 1;59(11):3443-3451. |



|    |                      |           |                 |            |                                                                                                                                                                                                                                                                                                                                                                                                                               |
|----|----------------------|-----------|-----------------|------------|-------------------------------------------------------------------------------------------------------------------------------------------------------------------------------------------------------------------------------------------------------------------------------------------------------------------------------------------------------------------------------------------------------------------------------|
| 47 | Govoni et al., 2006  | 2000      | Incidence (ACR) | Italy      | Govoni M, Castellino G, Bosi S, Napoli N, Trotta F. Incidence and prevalence of systemic lupus erythematosus in a district of north Italy. <i>Lupus</i> . 2006;15(2):110-3.                                                                                                                                                                                                                                                   |
| 47 | Govoni et al., 2006  | 2001      | Incidence (ACR) | Italy      | Govoni M, Castellino G, Bosi S, Napoli N, Trotta F. Incidence and prevalence of systemic lupus erythematosus in a district of north Italy. <i>Lupus</i> . 2006;15(2):110-3.                                                                                                                                                                                                                                                   |
| 47 | Govoni et al., 2006  | 2002      | Incidence (ACR) | Italy      | Govoni M, Castellino G, Bosi S, Napoli N, Trotta F. Incidence and prevalence of systemic lupus erythematosus in a district of north Italy. <i>Lupus</i> . 2006;15(2):110-3.                                                                                                                                                                                                                                                   |
| 85 | Tsioni et al., 2015  | 2009-2012 | Incidence (ACR) | Italy      | Tsioni V, Andreoli L, Meini A, Frassi M, Raffetti E, Airò P, Allegri F, Donato F, Tincani A. The prevalence and incidence of systemic lupus erythematosus in children and adults: a population-based study in a mountain community in northern Italy. <i>Clin Exp Rheumatol</i> . 2015 Sep-Oct;33(5):681-7.                                                                                                                   |
| 54 | Iseki et al., 1994   | 1982-1991 | Incidence (ARA) | Japan      | Iseki K, Miyasato F, Oura T, Uehara H, Nishime K, Fukiyama K. An epidemiologic analysis of end-stage lupus nephritis. <i>Am J Kidney Dis</i> . 1994 Apr;23(4):547-54.                                                                                                                                                                                                                                                         |
| 72 | Nasonov et al., 2014 | 2010      | Incidence (ACR) | Kazakhstan | Nasonov E, Soloviev S, Davidson JE, Lila A, Ivanova R, Togizbayev G, Omarbekova Z, Shevchuk S, Iarenko O, Gnylorybov A, Smailova Z, Chernogolov V, Malynovska K, Vasyliev A, Pereira MH. The prevalence and incidence of systemic lupus erythematosus (SLE) in selected cities from three Commonwealth of Independent States countries (the Russian Federation, Ukraine and Kazakhstan). <i>Lupus</i> . 2014 Feb;23(2):213-9. |
| 7  | Bae et al., 2020     | 2005      | Incidence       | Korea      | Bae EH, Lim SY, Han KD, Jung JH, Choi HS, Kim HY, Kim CS, Ma SK, Kim SW. Trend of prevalence and incidence of systemic lupus erythematosus in South Korea, 2005 to 2015: a nationwide population-based study. <i>Korean J Intern Med</i> . 2020 May;35(3):652-661.                                                                                                                                                            |
| 7  | Bae et al., 2020     | 2006      | Incidence       | Korea      | Bae EH, Lim SY, Han KD, Jung JH, Choi HS, Kim HY, Kim CS, Ma SK, Kim SW. Trend of prevalence and incidence of systemic lupus erythematosus in South Korea, 2005 to 2015: a nationwide population-based study. <i>Korean J Intern Med</i> . 2020 May;35(3):652-661.                                                                                                                                                            |

|   |                  |      |           |       |                                                                                                                                                                                                                                                                   |
|---|------------------|------|-----------|-------|-------------------------------------------------------------------------------------------------------------------------------------------------------------------------------------------------------------------------------------------------------------------|
| 7 | Bae et al., 2020 | 2007 | Incidence | Korea | Bae EH, Lim SY, Han KD, Jung JH, Choi HS, Kim HY, Kim CS, Ma SK, Kim SW. Trend of prevalence and incidence of systemic lupus erythematosus in South Korea, 2005 to 2015: a nationwide population-based study. <i>Korean J Intern Med.</i> 2020 May;35(3):652-661. |
| 7 | Bae et al., 2020 | 2008 | Incidence | Korea | Bae EH, Lim SY, Han KD, Jung JH, Choi HS, Kim HY, Kim CS, Ma SK, Kim SW. Trend of prevalence and incidence of systemic lupus erythematosus in South Korea, 2005 to 2015: a nationwide population-based study. <i>Korean J Intern Med.</i> 2020 May;35(3):652-661. |
| 7 | Bae et al., 2020 | 2009 | Incidence | Korea | Bae EH, Lim SY, Han KD, Jung JH, Choi HS, Kim HY, Kim CS, Ma SK, Kim SW. Trend of prevalence and incidence of systemic lupus erythematosus in South Korea, 2005 to 2015: a nationwide population-based study. <i>Korean J Intern Med.</i> 2020 May;35(3):652-661. |
| 7 | Bae et al., 2020 | 2010 | Incidence | Korea | Bae EH, Lim SY, Han KD, Jung JH, Choi HS, Kim HY, Kim CS, Ma SK, Kim SW. Trend of prevalence and incidence of systemic lupus erythematosus in South Korea, 2005 to 2015: a nationwide population-based study. <i>Korean J Intern Med.</i> 2020 May;35(3):652-661. |
| 7 | Bae et al., 2020 | 2011 | Incidence | Korea | Bae EH, Lim SY, Han KD, Jung JH, Choi HS, Kim HY, Kim CS, Ma SK, Kim SW. Trend of prevalence and incidence of systemic lupus erythematosus in South Korea, 2005 to 2015: a nationwide population-based study. <i>Korean J Intern Med.</i> 2020 May;35(3):652-661. |
| 7 | Bae et al., 2020 | 2012 | Incidence | Korea | Bae EH, Lim SY, Han KD, Jung JH, Choi HS, Kim HY, Kim CS, Ma SK, Kim SW. Trend of prevalence and incidence of systemic lupus erythematosus in South Korea, 2005 to 2015: a nationwide population-based study. <i>Korean J Intern Med.</i> 2020 May;35(3):652-661. |
| 7 | Bae et al., 2020 | 2013 | Incidence | Korea | Bae EH, Lim SY, Han KD, Jung JH, Choi HS, Kim HY, Kim CS, Ma SK, Kim SW. Trend of prevalence and incidence of systemic lupus erythematosus in South Korea, 2005 to 2015: a nationwide population-based study. <i>Korean J Intern Med.</i> 2020 May;35(3):652-661. |
| 7 | Bae et al., 2020 | 2014 | Incidence | Korea | Bae EH, Lim SY, Han KD, Jung JH, Choi HS, Kim HY, Kim CS, Ma SK, Kim SW. Trend of prevalence and incidence of systemic lupus erythematosus in South Korea,                                                                                                        |

|    |                    |           |                 |       |                                                                                                                                                                                                                                                                   |
|----|--------------------|-----------|-----------------|-------|-------------------------------------------------------------------------------------------------------------------------------------------------------------------------------------------------------------------------------------------------------------------|
| 7  | Bae et al., 2020   | 2015      | Incidence       | Korea | 2005 to 2015: a nationwide population-based study. <i>Korean J Intern Med.</i> 2020 May;35(3):652-661.                                                                                                                                                            |
| 14 | Chung et al., 2021 | 2011      | Incidence       | Korea | Bae EH, Lim SY, Han KD, Jung JH, Choi HS, Kim HY, Kim CS, Ma SK, Kim SW. Trend of prevalence and incidence of systemic lupus erythematosus in South Korea, 2005 to 2015: a nationwide population-based study. <i>Korean J Intern Med.</i> 2020 May;35(3):652-661. |
| 14 | Chung et al., 2021 | 2012      | Incidence       | Korea | Chung MK, Park JS, Lim H, Lee CH, Lee J. Incidence and prevalence of systemic lupus erythematosus among Korean women in childbearing years: A nationwide population-based study. <i>Lupus.</i> 2021 Apr;30(4):674-679.                                            |
| 14 | Chung et al., 2021 | 2012      | Incidence       | Korea | Chung MK, Park JS, Lim H, Lee CH, Lee J. Incidence and prevalence of systemic lupus erythematosus among Korean women in childbearing years: A nationwide population-based study. <i>Lupus.</i> 2021 Apr;30(4):674-679.                                            |
| 14 | Chung et al., 2021 | 2013      | Incidence       | Korea | Chung MK, Park JS, Lim H, Lee CH, Lee J. Incidence and prevalence of systemic lupus erythematosus among Korean women in childbearing years: A nationwide population-based study. <i>Lupus.</i> 2021 Apr;30(4):674-679.                                            |
| 14 | Chung et al., 2021 | 2014      | Incidence       | Korea | Chung MK, Park JS, Lim H, Lee CH, Lee J. Incidence and prevalence of systemic lupus erythematosus among Korean women in childbearing years: A nationwide population-based study. <i>Lupus.</i> 2021 Apr;30(4):674-679.                                            |
| 14 | Chung et al., 2021 | 2015      | Incidence       | Korea | Chung MK, Park JS, Lim H, Lee CH, Lee J. Incidence and prevalence of systemic lupus erythematosus among Korean women in childbearing years: A nationwide population-based study. <i>Lupus.</i> 2021 Apr;30(4):674-679.                                            |
| 14 | Chung et al., 2021 | 2016      | Incidence       | Korea | Chung MK, Park JS, Lim H, Lee CH, Lee J. Incidence and prevalence of systemic lupus erythematosus among Korean women in childbearing years: A nationwide population-based study. <i>Lupus.</i> 2021 Apr;30(4):674-679.                                            |
| 58 | Kwak et al., 2021  | 2016-2017 | Incidence (ACR) | Korea | Kwak SG, Park SH, Kim JY. Incidence and Prevalence of Juvenile Systemic Lupus Erythematosus in Korea: Data From the 2017 National Health Claims Database. <i>J Rheumatol.</i> 2021 Feb;48(2):258-261.                                                             |
| 80 | Shim et al., 2014  | 2008      | Incidence (ACR) | Korea | Shim JS, Sung YK, Joo YB, Lee HS, Bae SC. Prevalence and incidence of systemic lupus erythematosus in South Korea. <i>Rheumatol Int.</i> 2014 Jul;34(7):909-17.                                                                                                   |

|     |                          |           |                   |             |                                                                                                                                                                                                                                                      |
|-----|--------------------------|-----------|-------------------|-------------|------------------------------------------------------------------------------------------------------------------------------------------------------------------------------------------------------------------------------------------------------|
| 80  | Shim et al., 2014        | 2009      | Incidence (ACR)   | Korea       | Shim JS, Sung YK, Joo YB, Lee HS, Bae SC. Prevalence and incidence of systemic lupus erythematosus in South Korea. <i>Rheumatol Int.</i> 2014 Jul;34(7):909-17.                                                                                      |
| 95  | Magro et al., 2018       | 2012-2016 | Incidence (SLICC) | Malta       | Magro R, Borg AA. Characterisation of Patients with Systemic Lupus Erythematosus in Malta: A Population Based Cohort Cross-Sectional Study. <i>Biomed Res Int.</i> 2018 Sep 30;2018:2385386.                                                         |
| 108 | Nossent et al., 1992     | 1980-1989 | Incidence (ARA)   | Netherlands | Nossent JC. Systemic lupus erythematosus on the Caribbean island of Curaçao: an epidemiological investigation. <i>Ann Rheum Dis.</i> 1992 Nov;51(11):1197-201.                                                                                       |
| 62  | Lerang et al., 2012      | 1999-2008 | Incidence (ACR)   | Norway      | Lerang K, Gilboe I, Garen T, Thelle DS, Gran JT. High incidence and prevalence of systemic lupus erythematosus in Norway. <i>Lupus.</i> 2012 Oct;21(12):1362-9.                                                                                      |
| 102 | Nossent et al., 2001     | 1978-1996 | Incidence (ACR)   | Norway      | Nossent HC. Systemic lupus erythematosus in the Arctic region of Norway. <i>J Rheumatol.</i> 2001 Mar;28(3):539-46.                                                                                                                                  |
| 82  | Śliwczyński et al., 2015 | 2008      | Incidence         | Poland      | Śliwczyński A, Brzozowska M, Iltchev P, Czeleko T, Teter Z, Tłustochowicz W, Marczak M, Tłustochowicz M. Changes in the morbidity and costs of systemic lupus erythematosus in Poland in the years 2008-2012. <i>Reumatologia.</i> 2015;53(2):79-86. |
| 82  | Śliwczyński et al., 2015 | 2009      | Incidence         | Poland      | Śliwczyński A, Brzozowska M, Iltchev P, Czeleko T, Teter Z, Tłustochowicz W, Marczak M, Tłustochowicz M. Changes in the morbidity and costs of systemic lupus erythematosus in Poland in the years 2008-2012. <i>Reumatologia.</i> 2015;53(2):79-86. |
| 82  | Śliwczyński et al., 2015 | 2010      | Incidence         | Poland      | Śliwczyński A, Brzozowska M, Iltchev P, Czeleko T, Teter Z, Tłustochowicz W, Marczak M, Tłustochowicz M. Changes in the morbidity and costs of systemic lupus erythematosus in Poland in the years 2008-2012. <i>Reumatologia.</i> 2015;53(2):79-86. |
| 82  | Śliwczyński et al., 2015 | 2011      | Incidence         | Poland      | Śliwczyński A, Brzozowska M, Iltchev P, Czeleko T, Teter Z, Tłustochowicz W, Marczak M, Tłustochowicz M. Changes in the morbidity and costs of systemic lupus erythematosus in Poland in the years 2008-2012. <i>Reumatologia.</i> 2015;53(2):79-86. |
| 82  | Śliwczyński et al., 2015 | 2012      | Incidence         | Poland      | Śliwczyński A, Brzozowska M, Iltchev P, Czeleko T, Teter Z, Tłustochowicz W, Marczak M, Tłustochowicz M. Changes in the morbidity and costs of systemic                                                                                              |

|     |                         |           |                 |        |                                                                                                                                                                                                                                                                                                                                                                                                                                 |
|-----|-------------------------|-----------|-----------------|--------|---------------------------------------------------------------------------------------------------------------------------------------------------------------------------------------------------------------------------------------------------------------------------------------------------------------------------------------------------------------------------------------------------------------------------------|
|     |                         |           |                 |        | lupus erythematosus in Poland in the years 2008-2012. <i>Reumatologia</i> . 2015;53(2):79-86.                                                                                                                                                                                                                                                                                                                                   |
| 72  | Nasonov et al., 2014    | 2010      | Incidence (ACR) | Russia | Nasonov E, Soloviev S, Davidson JE, Lila A, Ivanova R, Togizbayev G, Omarbekova Z, Shevchuk S, Iaremenko O, Gnylorybov A, Smailova Z, Chernogolov V, Malynovska K, Vasyliev A, Pereira MH. The prevalence and incidence of systemic lupus erythematosus (SLE) in selected cities from three Commonwealth of Independent States countries (the Russian Federation, Ukraine and Kazakhstan). <i>Lupus</i> . 2014 Feb;23(2):213-9. |
| 5   | Alonso et al., 2011     | 1987-1991 | Incidence (ACR) | Spain  | Alonso MD, Llorca J, Martinez-Vazquez F, Miranda-Fillooy JA, Diaz de Teran T, Dierssen T, Vazquez-Rodriguez TR, Gomez-Acebo I, Blanco R, Gonzalez-Gay MA. Systemic lupus erythematosus in northwestern Spain: a 20-year epidemiologic study. <i>Medicine (Baltimore)</i> . 2011 Sep;90(5):350-358.                                                                                                                              |
| 5   | Alonso et al., 2011     | 1992-1996 | Incidence (ACR) | Spain  | Alonso MD, Llorca J, Martinez-Vazquez F, Miranda-Fillooy JA, Diaz de Teran T, Dierssen T, Vazquez-Rodriguez TR, Gomez-Acebo I, Blanco R, Gonzalez-Gay MA. Systemic lupus erythematosus in northwestern Spain: a 20-year epidemiologic study. <i>Medicine (Baltimore)</i> . 2011 Sep;90(5):350-358.                                                                                                                              |
| 5   | Alonso et al., 2011     | 1997-2001 | Incidence (ACR) | Spain  | Alonso MD, Llorca J, Martinez-Vazquez F, Miranda-Fillooy JA, Diaz de Teran T, Dierssen T, Vazquez-Rodriguez TR, Gomez-Acebo I, Blanco R, Gonzalez-Gay MA. Systemic lupus erythematosus in northwestern Spain: a 20-year epidemiologic study. <i>Medicine (Baltimore)</i> . 2011 Sep;90(5):350-358.                                                                                                                              |
| 5   | Alonso et al., 2011     | 2002-2006 | Incidence (ACR) | Spain  | Alonso MD, Llorca J, Martinez-Vazquez F, Miranda-Fillooy JA, Diaz de Teran T, Dierssen T, Vazquez-Rodriguez TR, Gomez-Acebo I, Blanco R, Gonzalez-Gay MA. Systemic lupus erythematosus in northwestern Spain: a 20-year epidemiologic study. <i>Medicine (Baltimore)</i> . 2011 Sep;90(5):350-358.                                                                                                                              |
| 106 | López et al., 2003      | 2002      | Incidence (ACR) | Spain  | López P, Mozo L, Gutiérrez C, Suárez A. Epidemiology of systemic lupus erythematosus in a northern Spanish population: gender and age influence on immunological features. <i>Lupus</i> . 2003;12(11):860-5.                                                                                                                                                                                                                    |
| 53  | Ingvarsson et al., 2016 | 1981-1993 | Incidence (ACR) | Sweden | Ingvarsson RF, Bengtsson AA, Jönsen A. Variations in the epidemiology of systemic lupus erythematosus in southern Sweden. <i>Lupus</i> . 2016 Jun;25(7):772-80.                                                                                                                                                                                                                                                                 |

|     |                               |           |                 |                      |                                                                                                                                                                                                                                                                                                                                                                                                                                 |
|-----|-------------------------------|-----------|-----------------|----------------------|---------------------------------------------------------------------------------------------------------------------------------------------------------------------------------------------------------------------------------------------------------------------------------------------------------------------------------------------------------------------------------------------------------------------------------|
| 53  | Ingvarsson et al., 2016       | 1994-2006 | Incidence (ACR) | Sweden               | Ingvarsson RF, Bengtsson AA, Jönsen A. Variations in the epidemiology of systemic lupus erythematosus in southern Sweden. <i>Lupus</i> . 2016 Jun;25(7):772-80.                                                                                                                                                                                                                                                                 |
| 104 | Ståhl-Hallengren et al., 2000 | 1987-1991 | Incidence (ACR) | Sweden               | Ståhl-Hallengren C, Jönsen A, Nived O, Sturfelt G. Incidence studies of systemic lupus erythematosus in Southern Sweden: increasing age, decreasing frequency of renal manifestations and good prognosis. <i>J Rheumatol</i> . 2000 Mar;27(3):685-91.                                                                                                                                                                           |
| 104 | Ståhl-Hallengren et al., 2000 | 1981-1986 | Incidence (ACR) | Sweden               | Ståhl-Hallengren C, Jönsen A, Nived O, Sturfelt G. Incidence studies of systemic lupus erythematosus in Southern Sweden: increasing age, decreasing frequency of renal manifestations and good prognosis. <i>J Rheumatol</i> . 2000 Mar;27(3):685-91.                                                                                                                                                                           |
| 76  | Pamuk et al., 2016            | 2003-2014 | Incidence (ACR) | Turkey               | Pamuk ON, Balci MA, Donmez S, Tsokos GC. The incidence and prevalence of systemic lupus erythematosus in Thrace, 2003-2014: A 12-year epidemiological study. <i>Lupus</i> . 2016 Jan;25(1):102-9.                                                                                                                                                                                                                               |
| 72  | Nasonov et al., 2014          | 2010      | Incidence (ACR) | Ukraine              | Nasonov E, Soloviev S, Davidson JE, Lila A, Ivanova R, Togizbayev G, Omarbekova Z, Shevchuk S, Iaremenko O, Gnylorybov A, Smailova Z, Chernogolov V, Malynovska K, Vasylyev A, Pereira MH. The prevalence and incidence of systemic lupus erythematosus (SLE) in selected cities from three Commonwealth of Independent States countries (the Russian Federation, Ukraine and Kazakhstan). <i>Lupus</i> . 2014 Feb;23(2):213-9. |
| 3   | Al Dhanhani et al., 2017      | 2009-2012 | Incidence (ACR) | United Arab Emirates | Al Dhanhani AM, Agarwal M, Othman YS, Bakoush O. Incidence and prevalence of systemic lupus erythematosus among the native Arab population in UAE. <i>Lupus</i> . 2017 May;26(6):664-669.                                                                                                                                                                                                                                       |
| 51  | Hopkinson et al., 1993        | 1989-1990 | Incidence       | United Kingdom       | Hopkinson ND, Doherty M, Powell RJ. The prevalence and incidence of systemic lupus erythematosus in Nottingham, UK, 1989-1990. <i>Br J Rheumatol</i> . 1993 Feb;32(2):110-5.                                                                                                                                                                                                                                                    |
| 74  | Nightingale et al., 2006      | 1992-1998 | Incidence       | United Kingdom       | Nightingale AL, Farmer RD, de Vries CS. Incidence of clinically diagnosed systemic lupus erythematosus 1992-1998 using the UK General Practice Research Database. <i>Pharmacoepidemiol Drug Saf</i> . 2006 Sep;15(9):656-61.                                                                                                                                                                                                    |

|    |                   |      |           |                |                                                                                                                                                                                               |
|----|-------------------|------|-----------|----------------|-----------------------------------------------------------------------------------------------------------------------------------------------------------------------------------------------|
| 78 | Rees et al., 2016 | 1999 | Incidence | United Kingdom | Rees F, Doherty M, Grainge M, Davenport G, Lanyon P, Zhang W. The incidence and prevalence of systemic lupus erythematosus in the UK, 1999-2012. <i>Ann Rheum Dis.</i> 2016 Jan;75(1):136-41. |
| 78 | Rees et al., 2016 | 2000 | Incidence | United Kingdom | Rees F, Doherty M, Grainge M, Davenport G, Lanyon P, Zhang W. The incidence and prevalence of systemic lupus erythematosus in the UK, 1999-2012. <i>Ann Rheum Dis.</i> 2016 Jan;75(1):136-41. |
| 78 | Rees et al., 2016 | 2001 | Incidence | United Kingdom | Rees F, Doherty M, Grainge M, Davenport G, Lanyon P, Zhang W. The incidence and prevalence of systemic lupus erythematosus in the UK, 1999-2012. <i>Ann Rheum Dis.</i> 2016 Jan;75(1):136-41. |
| 78 | Rees et al., 2016 | 2002 | Incidence | United Kingdom | Rees F, Doherty M, Grainge M, Davenport G, Lanyon P, Zhang W. The incidence and prevalence of systemic lupus erythematosus in the UK, 1999-2012. <i>Ann Rheum Dis.</i> 2016 Jan;75(1):136-41. |
| 78 | Rees et al., 2016 | 2003 | Incidence | United Kingdom | Rees F, Doherty M, Grainge M, Davenport G, Lanyon P, Zhang W. The incidence and prevalence of systemic lupus erythematosus in the UK, 1999-2012. <i>Ann Rheum Dis.</i> 2016 Jan;75(1):136-41. |
| 78 | Rees et al., 2016 | 2004 | Incidence | United Kingdom | Rees F, Doherty M, Grainge M, Davenport G, Lanyon P, Zhang W. The incidence and prevalence of systemic lupus erythematosus in the UK, 1999-2012. <i>Ann Rheum Dis.</i> 2016 Jan;75(1):136-41. |
| 78 | Rees et al., 2016 | 2005 | Incidence | United Kingdom | Rees F, Doherty M, Grainge M, Davenport G, Lanyon P, Zhang W. The incidence and prevalence of systemic lupus erythematosus in the UK, 1999-2012. <i>Ann Rheum Dis.</i> 2016 Jan;75(1):136-41. |
| 78 | Rees et al., 2016 | 2006 | Incidence | United Kingdom | Rees F, Doherty M, Grainge M, Davenport G, Lanyon P, Zhang W. The incidence and prevalence of systemic lupus erythematosus in the UK, 1999-2012. <i>Ann Rheum Dis.</i> 2016 Jan;75(1):136-41. |
| 78 | Rees et al., 2016 | 2007 | Incidence | United Kingdom | Rees F, Doherty M, Grainge M, Davenport G, Lanyon P, Zhang W. The incidence and prevalence of systemic lupus erythematosus in the UK, 1999-2012. <i>Ann Rheum Dis.</i> 2016 Jan;75(1):136-41. |

|     |                      |           |                 |                |                                                                                                                                                                                                                                                                                            |
|-----|----------------------|-----------|-----------------|----------------|--------------------------------------------------------------------------------------------------------------------------------------------------------------------------------------------------------------------------------------------------------------------------------------------|
| 78  | Rees et al., 2016    | 2008      | Incidence       | United Kingdom | Rees F, Doherty M, Grainge M, Davenport G, Lanyon P, Zhang W. The incidence and prevalence of systemic lupus erythematosus in the UK, 1999-2012. <i>Ann Rheum Dis.</i> 2016 Jan;75(1):136-41.                                                                                              |
| 78  | Rees et al., 2016    | 2009      | Incidence       | United Kingdom | Rees F, Doherty M, Grainge M, Davenport G, Lanyon P, Zhang W. The incidence and prevalence of systemic lupus erythematosus in the UK, 1999-2012. <i>Ann Rheum Dis.</i> 2016 Jan;75(1):136-41.                                                                                              |
| 78  | Rees et al., 2016    | 2010      | Incidence       | United Kingdom | Rees F, Doherty M, Grainge M, Davenport G, Lanyon P, Zhang W. The incidence and prevalence of systemic lupus erythematosus in the UK, 1999-2012. <i>Ann Rheum Dis.</i> 2016 Jan;75(1):136-41.                                                                                              |
| 78  | Rees et al., 2016    | 2011      | Incidence       | United Kingdom | Rees F, Doherty M, Grainge M, Davenport G, Lanyon P, Zhang W. The incidence and prevalence of systemic lupus erythematosus in the UK, 1999-2012. <i>Ann Rheum Dis.</i> 2016 Jan;75(1):136-41.                                                                                              |
| 78  | Rees et al., 2016    | 2012      | Incidence       | United Kingdom | Rees F, Doherty M, Grainge M, Davenport G, Lanyon P, Zhang W. The incidence and prevalence of systemic lupus erythematosus in the UK, 1999-2012. <i>Ann Rheum Dis.</i> 2016 Jan;75(1):136-41.                                                                                              |
| 84  | Somers et al., 2007  | 1990-1999 | Incidence       | United Kingdom | Somers EC, Thomas SL, Smeeth L, Schoonen WM, Hall AJ. Incidence of systemic lupus erythematosus in the United Kingdom, 1990-1999. <i>Arthritis Rheum.</i> 2007 May 15;57(4):612-8.                                                                                                         |
| 64  | Lythgoe et al., 2022 | 2017-2019 | Incidence (ACR) | United Kingdom | Lythgoe H, Smith EMD, Killeen OG, Murphy R, Pilkington C, Pain CE, Beresford MW. Prospective epidemiological study of juvenile-onset Systemic Lupus Erythematosus in the United Kingdom and Republic of Ireland. <i>Rheumatology (Oxford).</i> 2022 Feb 3:keac064.                         |
| 105 | Johnson et al., 1995 | 1991      | Incidence (ACR) | United Kingdom | Johnson AE, Gordon C, Palmer RG, Bacon PA. The prevalence and incidence of systemic lupus erythematosus in Birmingham, England. Relationship to ethnicity and country of birth. <i>Arthritis Rheum.</i> 1995 Apr;38(4):551-8.                                                              |
| 39  | Feldman et al., 2013 | 2000-2004 | Incidence       | United States  | Feldman CH, Hiraki LT, Liu J, Fischer MA, Solomon DH, Alarcón GS, Winkelmayer WC, Costenbader KH. Epidemiology and sociodemographics of systemic lupus erythematosus and lupus nephritis among US adults with Medicaid coverage, 2000-2004. <i>Arthritis Rheum.</i> 2013 Mar;65(3):753-63. |



|    |                     |           |           |               |                                                                                                                                                                                                                                                                                                               |
|----|---------------------|-----------|-----------|---------------|---------------------------------------------------------------------------------------------------------------------------------------------------------------------------------------------------------------------------------------------------------------------------------------------------------------|
| 43 | Furst et al., 2013  | 2003-2008 | Incidence | United States | Furst DE, Clarke AE, Fernandes AW, Bancroft T, Greth W, Iorga SR. Incidence and prevalence of adult systemic lupus erythematosus in a large US managed-care population. <i>Lupus</i> . 2013 Jan;22(1):99-105.                                                                                                 |
| 49 | Hiraki et al., 2012 | 2000-2004 | Incidence | United States | Hiraki LT, Feldman CH, Liu J, Alarcón GS, Fischer MA, Winkelmayr WC, Costenbader KH. Prevalence, incidence, and demographics of systemic lupus erythematosus and lupus nephritis from 2000 to 2004 among children in the US Medicaid beneficiary population. <i>Arthritis Rheum</i> . 2012 Aug;64(8):2669-76. |
| 93 | Li et al., 2020     | 2009      | Incidence | United States | Li S, Gong T, Peng Y, Nieman KM, Gilbertson DT. Prevalence and incidence of systemic lupus erythematosus and associated outcomes in the 2009-2016 US Medicare population. <i>Lupus</i> . 2020 Jan;29(1):15-26.                                                                                                |
| 93 | Li et al., 2020     | 2010      | Incidence | United States | Li S, Gong T, Peng Y, Nieman KM, Gilbertson DT. Prevalence and incidence of systemic lupus erythematosus and associated outcomes in the 2009-2016 US Medicare population. <i>Lupus</i> . 2020 Jan;29(1):15-26.                                                                                                |
| 93 | Li et al., 2020     | 2011      | Incidence | United States | Li S, Gong T, Peng Y, Nieman KM, Gilbertson DT. Prevalence and incidence of systemic lupus erythematosus and associated outcomes in the 2009-2016 US Medicare population. <i>Lupus</i> . 2020 Jan;29(1):15-26.                                                                                                |
| 93 | Li et al., 2020     | 2012      | Incidence | United States | Li S, Gong T, Peng Y, Nieman KM, Gilbertson DT. Prevalence and incidence of systemic lupus erythematosus and associated outcomes in the 2009-2016 US Medicare population. <i>Lupus</i> . 2020 Jan;29(1):15-26.                                                                                                |
| 93 | Li et al., 2020     | 2013      | Incidence | United States | Li S, Gong T, Peng Y, Nieman KM, Gilbertson DT. Prevalence and incidence of systemic lupus erythematosus and associated outcomes in the 2009-2016 US Medicare population. <i>Lupus</i> . 2020 Jan;29(1):15-26.                                                                                                |
| 93 | Li et al., 2020     | 2014      | Incidence | United States | Li S, Gong T, Peng Y, Nieman KM, Gilbertson DT. Prevalence and incidence of systemic lupus erythematosus and associated outcomes in the 2009-2016 US Medicare population. <i>Lupus</i> . 2020 Jan;29(1):15-26.                                                                                                |
| 93 | Li et al., 2020     | 2015      | Incidence | United States | Li S, Gong T, Peng Y, Nieman KM, Gilbertson DT. Prevalence and incidence of systemic lupus erythematosus and associated outcomes in the 2009-2016 US Medicare population. <i>Lupus</i> . 2020 Jan;29(1):15-26.                                                                                                |

|    |                          |           |                 |               |                                                                                                                                                                                                                                                                                                                                                                                   |
|----|--------------------------|-----------|-----------------|---------------|-----------------------------------------------------------------------------------------------------------------------------------------------------------------------------------------------------------------------------------------------------------------------------------------------------------------------------------------------------------------------------------|
| 93 | Li et al., 2020          | 2016      | Incidence       | United States | Li S, Gong T, Peng Y, Nieman KM, Gilbertson DT. Prevalence and incidence of systemic lupus erythematosus and associated outcomes in the 2009-2016 US Medicare population. <i>Lupus</i> . 2020 Jan;29(1):15-26.                                                                                                                                                                    |
| 17 | Dall'Era et al., 2017    | 2007-2009 | Incidence (ACR) | United States | Dall'Era M, Cisternas MG, Snipes K, Herrinton LJ, Gordon C, Helmick CG. The Incidence and Prevalence of Systemic Lupus Erythematosus in San Francisco County, California: The California Lupus Surveillance Project. <i>Arthritis Rheumatol</i> . 2017 Oct;69(10):1996-2005.                                                                                                      |
| 41 | Ferucci et al., 2014     | 2007-2009 | Incidence (ACR) | United States | Ferucci ED, Johnston JM, Gaddy JR, Sumner L, Posever JO, Choromanski TL, Gordon C, Lim SS, Helmick CG. Prevalence and incidence of systemic lupus erythematosus in a population-based registry of American Indian and Alaska Native people, 2007-2009. <i>Arthritis Rheumatol</i> . 2014 Sep;66(9):2494-502.                                                                      |
| 52 | Housey et al., 2015      | 2002-2005 | Incidence (ACR) | United States | Housey M, DeGuire P, Lyon-Callo S, Wang L, Marder W, McCune WJ, Helmick CG, Gordon C, Dhar JP, Leisen J, Somers EC. Incidence and prevalence of systemic lupus erythematosus among Arab and Chaldean Americans in southeastern Michigan: the Michigan Lupus Epidemiology and Surveillance Program. <i>Am J Public Health</i> . 2015 May;105(5):e74-9.                             |
| 55 | Izmirly et al., 2017     | 2007-2009 | Incidence (ACR) | United States | Izmirly PM, Wan I, Sahl S, Buyon JP, Belmont HM, Salmon JE, Askanase A, Bathon JM, Geraldino-Pardilla L, Ali Y, Ginzler EM, Putterman C, Gordon C, Helmick CG, Parton H. The Incidence and Prevalence of Systemic Lupus Erythematosus in New York County (Manhattan), New York: The Manhattan Lupus Surveillance Program. <i>Arthritis Rheumatol</i> . 2017 Oct;69(10):2006-2017. |
| 56 | Jarukitsopa et al., 2015 | 1993-2005 | Incidence (ACR) | United States | Jarukitsopa S, Hoganson DD, Crowson CS, Sokumbi O, Davis MD, Michet CJ Jr, Matteson EL, Maradit Kremers H, Chowdhary VR. Epidemiology of systemic lupus erythematosus and cutaneous lupus erythematosus in a predominantly white population in the United States. <i>Arthritis Care Res (Hoboken)</i> . 2015 May;67(6):817-28.                                                    |
| 63 | Lim et al., 2014         | 2002-2004 | Incidence (ACR) | United States | Lim SS, Bayakly AR, Helmick CG, Gordon C, Easley KA, Drenkard C. The incidence and prevalence of systemic lupus erythematosus, 2002-2004: The Georgia Lupus Registry. <i>Arthritis Rheumatol</i> . 2014 Feb;66(2):357-68.                                                                                                                                                         |

|     |                                |           |                   |               |                                                                                                                                                                                                                                                                                                                                                                                                              |
|-----|--------------------------------|-----------|-------------------|---------------|--------------------------------------------------------------------------------------------------------------------------------------------------------------------------------------------------------------------------------------------------------------------------------------------------------------------------------------------------------------------------------------------------------------|
| 68  | McCarty et al., 1995           | 1985-1990 | Incidence (ACR)   | United States | McCarty DJ, Manzi S, Medsger TA Jr, Ramsey-Goldman R, LaPorte RE, Kwok CK. Incidence of systemic lupus erythematosus. Race and gender differences. <i>Arthritis Rheum.</i> 1995 Sep;38(9):1260-70.                                                                                                                                                                                                           |
| 71  | Naleway et al., 2005           | 1991-2001 | Incidence (ACR)   | United States | Naleway AL, Davis ME, Greenlee RT, Wilson DA, McCarty DJ. Epidemiology of systemic lupus erythematosus in rural Wisconsin. <i>Lupus.</i> 2005;14(10):862-6.                                                                                                                                                                                                                                                  |
| 83  | Somers et al., 2014            | 2002-2004 | Incidence (ACR)   | United States | Somers EC, Marder W, Cagnoli P, Lewis EE, DeGuire P, Gordon C, Helmick CG, Wang L, Wing JJ, Dhar JP, Leisen J, Shaltis D, McCune WJ. Population-based incidence and prevalence of systemic lupus erythematosus: the Michigan Lupus Epidemiology and Surveillance program. <i>Arthritis Rheumatol.</i> 2014 Feb;66(2):369-78.                                                                                 |
| 86  | Valenzuela-Almada et al., 2022 | 1976-2018 | Incidence (ACR)   | United States | Valenzuela-Almada MO, Hocaoglu M, Dabit JY, Osei-Onomah SA, Basiaga ML, Orandi AB, Giblon RE, Barbour KE, Crowson CS, Duarte-García A. Epidemiology of Childhood-Onset Systemic Lupus Erythematosus: A Population-Based Study. <i>Arthritis Care Res (Hoboken).</i> 2022 May;74(5):728-732.                                                                                                                  |
| 92  | Ungprasert et al., 2017        | 1993-2005 | Incidence (ACR)   | United States | Ungprasert P, Sagar V, Crowson CS, Amin S, Makol A, Ernste FC, Osborn TG, Moder KG, Niewold TB, Maradit-Kremers H, Ramsey-Goldman R, Chowdhary VR. Incidence of systemic lupus erythematosus in a population-based cohort using revised 1997 American College of Rheumatology and the 2012 Systemic Lupus International Collaborating Clinics classification criteria. <i>Lupus.</i> 2017 Mar;26(3):240-247. |
| 107 | Uramoto et al., 1999           | 1980-1992 | Incidence (ACR)   | United States | Uramoto KM, Michet CJ Jr, Thumboo J, Sunku J, O'Fallon WM, Gabriel SE. Trends in the incidence and mortality of systemic lupus erythematosus, 1950-1992. <i>Arthritis Rheum.</i> 1999 Jan;42(1):46-50.                                                                                                                                                                                                       |
| 92  | Ungprasert et al., 2017        | 1993-2005 | Incidence (SLICC) | United States | Ungprasert P, Sagar V, Crowson CS, Amin S, Makol A, Ernste FC, Osborn TG, Moder KG, Niewold TB, Maradit-Kremers H, Ramsey-Goldman R, Chowdhary VR. Incidence of systemic lupus erythematosus in a population-based cohort using revised 1997 American College of Rheumatology and the 2012 Systemic Lupus International Collaborating Clinics classification criteria. <i>Lupus.</i> 2017 Mar;26(3):240-247. |

Abbreviation: ACR, The American College of Rheumatology; ARA, The American Rheumatism Association; SLICC, The Systemic Lupus International Collaborating Clinics.

**Table S7. Characteristics of studies reporting on prevalence of AD.**

| No. | Study                        | Study time | Prevalence type   | Country   | Reference                                                                                                                                                                                                                                                                                                                                                                                                                                                                                     |
|-----|------------------------------|------------|-------------------|-----------|-----------------------------------------------------------------------------------------------------------------------------------------------------------------------------------------------------------------------------------------------------------------------------------------------------------------------------------------------------------------------------------------------------------------------------------------------------------------------------------------------|
| 18  | Quintana et al., 2016        | 2010       | PT                | Argentina | Quintana R, Silvestre AM, Goñi M, García V, Mathern N, Jorfen M, Miljevic J, Dhair D, Laithe M, Conti S, Midauar F, Martin MC, Barrios MC, Nieto R, Prigione C, Sanabria A, Gervasoni V, Grabbe E, Gontero R, Peláez-Ballestas I, Pons-Estel BA. Prevalence of musculoskeletal disorders and rheumatic diseases in the indigenous Qom population of Rosario, Argentina. <i>Clin Rheumatol</i> . 2016 Jul;35 Suppl 1(Suppl 1):5-14.                                                            |
| 45  | Gonzalez Lucero et al., 2020 | 2006       | PP (1 year) (ACR) | Argentina | Gonzalez Lucero L, Barbaglia AL, Bellomio VI, Bertolaccini MC, Machado Escobar MA, Sueldo HR, Yacuzzi MS, Carrizo GA, Robles N, Rengel S, Cristofari A, Leal MO, Vasquez DL, Quinteros A, Seleme G, Molina MJ, Pera OL, Dip R, Olea AC, Torres AY, Espindola Echazu M, Arquez G, Lazaro H, Colombres F, Juarez LA, Romano O, Paz S, Santana M, Galindo L, Lucero E. Prevalence and incidence of systemic lupus erythematosus in Tucumán, Argentina. <i>Lupus</i> . 2020 Nov;29(13):1815-1820. |
| 98  | Scolnik et al., 2014         | 1998-2009  | PT (ACR)          | Argentina | Scolnik M, Marin J, Valeiras SM, Marchese MF, Talani AS, Avellaneda NL, Etchepare A, Etchepare P, Plou MS, Soriano ER. Incidence and prevalence of lupus in Buenos Aires, Argentina: a 11-year health management organisation-based study. <i>Lupus Sci Med</i> . 2014 Jun 5;1(1):e000021.                                                                                                                                                                                                    |
| 100 | Bossingham et al., 2003      | 1996-1998  | PP (1 year) (ACR) | Australia | Bossingham D. Systemic lupus erythematosus in the far north of Queensland. <i>Lupus</i> . 2003;12(4):327-31.                                                                                                                                                                                                                                                                                                                                                                                  |
| 101 | Segasothy et al., 2001       | 1990-1999  | PP (1 year) (ACR) | Australia | Segasothy M, Phillips PA. Systemic lupus erythematosus in Aborigines and Caucasians in central Australia: a comparative study. <i>Lupus</i> . 2001;10(6):439-44.                                                                                                                                                                                                                                                                                                                              |
| 111 | Anstey et al., 1993          | 1991       | PT (ARA)          | Australia | Anstey NM, Bastian I, Dunckley H, Currie BJ. Systemic lupus erythematosus in Australian aborigines: high prevalence, morbidity and mortality. <i>Aust N Z J Med</i> . 1993 Dec;23(6):646-51.                                                                                                                                                                                                                                                                                                  |

|    |                        |           |             |          |                                                                                                                                                                                                                                                                                                                            |
|----|------------------------|-----------|-------------|----------|----------------------------------------------------------------------------------------------------------------------------------------------------------------------------------------------------------------------------------------------------------------------------------------------------------------------------|
| 42 | Flower et al., 2012    | 2000-2009 | PT (ACR)    | Barbados | Flower C, Hennis AJ, Hambleton IR, Nicholson GD, Liang MH; Barbados National Lupus Registry Group. Systemic lupus erythematosus in an African Caribbean population: incidence, clinical manifestations, and survival in the Barbados National Lupus Registry. <i>Arthritis Care Res (Hoboken)</i> . 2012 Aug;64(8):1151-8. |
| 19 | Senna et al., 2004     | NR        | PT (ACR)    | Brazil   | Senna ER, De Barros AL, Silva EO, Costa IF, Pereira LV, Ciconelli RM, Ferraz MB. Prevalence of rheumatic diseases in Brazil: a study using the COPCORD approach. <i>J Rheumatol</i> . 2004 Mar;31(3):594-7.                                                                                                                |
| 10 | Bernatsky et al., 2007 | 1994-2003 | PP (1 year) | Canada   | Bernatsky S, Joseph L, Pineau CA, Tamblyn R, Feldman DE, Clarke AE. A population-based assessment of systemic lupus erythematosus incidence and prevalence--results and implications of using administrative data for epidemiological studies. <i>Rheumatology (Oxford)</i> . 2007 Dec;46(12):1814-8.                      |
| 38 | Fatoye et al., 2018    | 2000-2015 | PP (1 year) | Canada   | Fatoye F, Gebrye T, Svenson LW. Real-world incidence and prevalence of systemic lupus erythematosus in Alberta, Canada. <i>Rheumatol Int</i> . 2018 Sep;38(9):1721-1726.                                                                                                                                                   |
| 73 | Ng et al., 2013        | 2001      | PP (1 year) | Canada   | Ng R, Bernatsky S, Rahme E. Observation period effects on estimation of systemic lupus erythematosus incidence and prevalence in Quebec. <i>J Rheumatol</i> . 2013 Aug;40(8):1334-6.                                                                                                                                       |
| 77 | Peschken et al., 2000  | 1996      | PT (ACR)    | Canada   | Peschken CA, Esdaile JM. Systemic lupus erythematosus in North American Indians: a population based study. <i>J Rheumatol</i> . 2000 Aug;27(8):1884-91.                                                                                                                                                                    |
| 13 | Chiu et al., 2010      | 2000      | PP (1 year) | China    | Chiu YM, Lai CH. Nationwide population-based epidemiologic study of systemic lupus erythematosus in Taiwan. <i>Lupus</i> . 2010 Sep;19(10):1250-5.                                                                                                                                                                         |
| 13 | Chiu et al., 2010      | 2001      | PP (1 year) | China    | Chiu YM, Lai CH. Nationwide population-based epidemiologic study of systemic lupus erythematosus in Taiwan. <i>Lupus</i> . 2010 Sep;19(10):1250-5.                                                                                                                                                                         |
| 13 | Chiu et al., 2010      | 2002      | PP (1 year) | China    | Chiu YM, Lai CH. Nationwide population-based epidemiologic study of systemic lupus erythematosus in Taiwan. <i>Lupus</i> . 2010 Sep;19(10):1250-5.                                                                                                                                                                         |
| 13 | Chiu et al., 2010      | 2003      | PP (1 year) | China    | Chiu YM, Lai CH. Nationwide population-based epidemiologic study of systemic lupus erythematosus in Taiwan. <i>Lupus</i> . 2010 Sep;19(10):1250-5.                                                                                                                                                                         |
| 13 | Chiu et al., 2010      | 2004      | PP (1 year) | China    | Chiu YM, Lai CH. Nationwide population-based epidemiologic study of systemic lupus erythematosus in Taiwan. <i>Lupus</i> . 2010 Sep;19(10):1250-5.                                                                                                                                                                         |

|    |                     |           |             |       |                                                                                                                                                                                                                                                                     |
|----|---------------------|-----------|-------------|-------|---------------------------------------------------------------------------------------------------------------------------------------------------------------------------------------------------------------------------------------------------------------------|
| 13 | Chiu et al., 2010   | 2005      | PP (1 year) | China | Chiu YM, Lai CH. Nationwide population-based epidemiologic study of systemic lupus erythematosus in Taiwan. <i>Lupus</i> . 2010 Sep;19(10):1250-5.                                                                                                                  |
| 13 | Chiu et al., 2010   | 2006      | PP (1 year) | China | Chiu YM, Lai CH. Nationwide population-based epidemiologic study of systemic lupus erythematosus in Taiwan. <i>Lupus</i> . 2010 Sep;19(10):1250-5.                                                                                                                  |
| 13 | Chiu et al., 2010   | 2007      | PP (1 year) | China | Chiu YM, Lai CH. Nationwide population-based epidemiologic study of systemic lupus erythematosus in Taiwan. <i>Lupus</i> . 2010 Sep;19(10):1250-5.                                                                                                                  |
| 20 | Dai et al., 2003    | 1997-1998 | PT (ACR)    | China | Dai SM, Han XH, Zhao DB, Shi YQ, Liu Y, Meng JM. Prevalence of rheumatic symptoms, rheumatoid arthritis, ankylosing spondylitis, and gout in Shanghai, China: a COPCORD study. <i>J Rheumatol</i> . 2003 Oct;30(10):2245-51.                                        |
| 21 | Wigley et al., 1994 | NR        | PT          | China | Wigley RD, Zhang NZ, Zeng QY, Shi CS, Hu DW, Couchman K, Duff IF, Bennett PH. Rheumatic diseases in China: ILAR-China study comparing the prevalence of rheumatic symptoms in northern and southern rural populations. <i>J Rheumatol</i> . 1994 Aug;21(8):1484-90. |
| 61 | Leong et al., 2021  | 2001      | PP (1 year) | China | Leong PY, Huang JY, Chiou JY, Bai YC, Wei JC. The prevalence and incidence of systemic lupus erythematosus in Taiwan: a nationwide population-based study. <i>Sci Rep</i> . 2021 Mar 11;11(1):5631.                                                                 |
| 61 | Leong et al., 2021  | 2002      | PP (1 year) | China | Leong PY, Huang JY, Chiou JY, Bai YC, Wei JC. The prevalence and incidence of systemic lupus erythematosus in Taiwan: a nationwide population-based study. <i>Sci Rep</i> . 2021 Mar 11;11(1):5631.                                                                 |
| 61 | Leong et al., 2021  | 2003      | PP (1 year) | China | Leong PY, Huang JY, Chiou JY, Bai YC, Wei JC. The prevalence and incidence of systemic lupus erythematosus in Taiwan: a nationwide population-based study. <i>Sci Rep</i> . 2021 Mar 11;11(1):5631.                                                                 |
| 61 | Leong et al., 2021  | 2004      | PP (1 year) | China | Leong PY, Huang JY, Chiou JY, Bai YC, Wei JC. The prevalence and incidence of systemic lupus erythematosus in Taiwan: a nationwide population-based study. <i>Sci Rep</i> . 2021 Mar 11;11(1):5631.                                                                 |
| 61 | Leong et al., 2021  | 2005      | PP (1 year) | China | Leong PY, Huang JY, Chiou JY, Bai YC, Wei JC. The prevalence and incidence of systemic lupus erythematosus in Taiwan: a nationwide population-based study. <i>Sci Rep</i> . 2021 Mar 11;11(1):5631.                                                                 |
| 61 | Leong et al., 2021  | 2006      | PP (1 year) | China | Leong PY, Huang JY, Chiou JY, Bai YC, Wei JC. The prevalence and incidence of systemic lupus erythematosus in Taiwan: a nationwide population-based study. <i>Sci Rep</i> . 2021 Mar 11;11(1):5631.                                                                 |

|    |                                   |           |                   |          |                                                                                                                                                                                                                                                                                         |
|----|-----------------------------------|-----------|-------------------|----------|-----------------------------------------------------------------------------------------------------------------------------------------------------------------------------------------------------------------------------------------------------------------------------------------|
| 61 | Leong et al., 2021                | 2007      | PP (1 year)       | China    | Leong PY, Huang JY, Chiou JY, Bai YC, Wei JC. The prevalence and incidence of systemic lupus erythematosus in Taiwan: a nationwide population-based study. <i>Sci Rep.</i> 2021 Mar 11;11(1):5631.                                                                                      |
| 61 | Leong et al., 2021                | 2008      | PP (1 year)       | China    | Leong PY, Huang JY, Chiou JY, Bai YC, Wei JC. The prevalence and incidence of systemic lupus erythematosus in Taiwan: a nationwide population-based study. <i>Sci Rep.</i> 2021 Mar 11;11(1):5631.                                                                                      |
| 61 | Leong et al., 2021                | 2009      | PP (1 year)       | China    | Leong PY, Huang JY, Chiou JY, Bai YC, Wei JC. The prevalence and incidence of systemic lupus erythematosus in Taiwan: a nationwide population-based study. <i>Sci Rep.</i> 2021 Mar 11;11(1):5631.                                                                                      |
| 61 | Leong et al., 2021                | 2010      | PP (1 year)       | China    | Leong PY, Huang JY, Chiou JY, Bai YC, Wei JC. The prevalence and incidence of systemic lupus erythematosus in Taiwan: a nationwide population-based study. <i>Sci Rep.</i> 2021 Mar 11;11(1):5631.                                                                                      |
| 61 | Leong et al., 2021                | 2011      | PP (1 year)       | China    | Leong PY, Huang JY, Chiou JY, Bai YC, Wei JC. The prevalence and incidence of systemic lupus erythematosus in Taiwan: a nationwide population-based study. <i>Sci Rep.</i> 2021 Mar 11;11(1):5631.                                                                                      |
| 99 | Zou et al., 2014                  | 2009-2010 | PP (1 year) (ACR) | China    | Zou YF, Feng CC, Zhu JM, Tao JH, Chen GM, Ye QL, Cen H, Leng RX, Pan FM, Pan HF, Li R, Fan YG, Wang B, Li XP, Zhang FY, Ye DQ. Prevalence of systemic lupus erythematosus and risk factors in rural areas of Anhui Province. <i>Rheumatol Int.</i> 2014 Mar;34(3):347-56.               |
| 96 | Zeng et al., 1994                 | NR        | PT (ARA)          | China    | Zeng QY, Huang SB, Zhou XG, et al. Epidemiological investigation of rheumatism in the southern point of China-International Alliance against Rheumatism. <i>China Primary Medicine</i> , 1994(1):31-32.                                                                                 |
| 11 | Castro-Villarreal et al., 2021    | 2015-2017 | PP (1 year)       | Colombia | Castro-Villarreal S, Beltran-Ostos A, Valencia CF. Estimation of Prevalence and Incremental Costs of Systemic Lupus Erythematosus in a Middle-Income Country Using Machine Learning on Administrative Health Data. <i>Value Health Reg Issues.</i> 2021 Dec;26:98-104.                  |
| 22 | Francy-Milena Cuervo et al., 2020 | 2014-2016 | PT (ACR)          | Colombia | Francy-Milena Cuervo, Ana M. Santosa, Ingris Peláez-Ballestas, et al. Comparison of quality of life in patients with musculoskeletal symptoms, those with other comorbidities, and healthy people, in a Colombian open population study. <i>rev colomb reumatol.</i> 2020;27(3):166-176 |

|     |                               |           |             |          |                                                                                                                                                                                                                                                                                                        |
|-----|-------------------------------|-----------|-------------|----------|--------------------------------------------------------------------------------------------------------------------------------------------------------------------------------------------------------------------------------------------------------------------------------------------------------|
| 23  | Londoño et al., 2018          | 2014-2016 | PT (ACR)    | Colombia | Londoño J, Peláez Ballestas I, Cuervo F, et al. Prevalence of rheumatic disease in Colombia according to the Colombian Rheumatology Association (COPCORD) strategy. Prevalence study of rheumatic disease in Colombian population older than 18 years. <i>Rev Colomb Reumatol.</i> 2018;25(4):245-256. |
| 40  | Fernández-Ávila et al., 2019  | 2012-2016 | PP (1 year) | Colombia | Fernández-Ávila DG, Bernal-Macías S, Rincón-Riaño DN, Gutiérrez Dávila JM, Rosselli D. Prevalence of systemic lupus erythematosus in Colombia: data from the national health registry 2012-2016. <i>Lupus.</i> 2019 Sep;28(10):1273-1278.                                                              |
| 24  | Llerena et al., 2000          | 1981      | PT (ACR)    | Cuba     | Llerena GA, Toledano MG, Martínez AAH, et al. Prevalence of musculoskeletal complaints and disability in Cuba. A community based study using the COPCORD core questionnaire. <i>Clin Exp Rheumatol</i> 2000;18:739-742                                                                                 |
| 109 | Reyes-Llerena et al., 2009 NR |           | PT          | Cuba     | Reyes-Llerena GA, Guibert-Toledano M, Penedo-Coello A, Pérez-Rodríguez A, Baez-Dueñas RM, Charnicharo-Vidal R, Cardiel MH. Community-based study to estimate prevalence and burden of illness of rheumatic diseases in Cuba: a COPCORD study. <i>J Clin Rheumatol.</i> 2009 Mar;15(2):51-5.            |
| 48  | Hermansen et al., 2016        | 2011      | PT          | Denmark  | Hermansen ML, Lindhardsen J, Torp-Pedersen C, Faurschou M, Jacobsen S. Incidence of Systemic Lupus Erythematosus and Lupus Nephritis in Denmark: A Nationwide Cohort Study. <i>J Rheumatol.</i> 2016 Jul;43(7):1335-9.                                                                                 |
| 60  | Lastrup et al., 2009          | 1994      | PT (ACR)    | Denmark  | Lastrup H, Voss A, Green A, Junker P. Occurrence of systemic lupus erythematosus in a Danish community: an 8-year prospective study. <i>Scand J Rheumatol.</i> 2009 Mar-Apr;38(2):128-32.                                                                                                              |
| 60  | Lastrup et al., 2009          | 1995      | PT (ACR)    | Denmark  | Lastrup H, Voss A, Green A, Junker P. Occurrence of systemic lupus erythematosus in a Danish community: an 8-year prospective study. <i>Scand J Rheumatol.</i> 2009 Mar-Apr;38(2):128-32.                                                                                                              |
| 60  | Lastrup et al., 2009          | 1996      | PT (ACR)    | Denmark  | Lastrup H, Voss A, Green A, Junker P. Occurrence of systemic lupus erythematosus in a Danish community: an 8-year prospective study. <i>Scand J Rheumatol.</i> 2009 Mar-Apr;38(2):128-32.                                                                                                              |
| 60  | Lastrup et al., 2009          | 1997      | PT (ACR)    | Denmark  | Lastrup H, Voss A, Green A, Junker P. Occurrence of systemic lupus erythematosus in a Danish community: an 8-year prospective study. <i>Scand J Rheumatol.</i> 2009 Mar-Apr;38(2):128-32.                                                                                                              |



|     |                              |           |             |         |                                                                                                                                                                                                                                  |
|-----|------------------------------|-----------|-------------|---------|----------------------------------------------------------------------------------------------------------------------------------------------------------------------------------------------------------------------------------|
| 60  | Lastrup et al., 2009         | 1998      | PT (ACR)    | Denmark | Lastrup H, Voss A, Green A, Junker P. Occurrence of systemic lupus erythematosus in a Danish community: an 8-year prospective study. <i>Scand J Rheumatol.</i> 2009 Mar-Apr;38(2):128-32.                                        |
| 60  | Lastrup et al., 2009         | 1999      | PT (ACR)    | Denmark | Lastrup H, Voss A, Green A, Junker P. Occurrence of systemic lupus erythematosus in a Danish community: an 8-year prospective study. <i>Scand J Rheumatol.</i> 2009 Mar-Apr;38(2):128-32.                                        |
| 60  | Lastrup et al., 2009         | 2000      | PT (ACR)    | Denmark | Lastrup H, Voss A, Green A, Junker P. Occurrence of systemic lupus erythematosus in a Danish community: an 8-year prospective study. <i>Scand J Rheumatol.</i> 2009 Mar-Apr;38(2):128-32.                                        |
| 60  | Lastrup et al., 2009         | 2001      | PT (ACR)    | Denmark | Lastrup H, Voss A, Green A, Junker P. Occurrence of systemic lupus erythematosus in a Danish community: an 8-year prospective study. <i>Scand J Rheumatol.</i> 2009 Mar-Apr;38(2):128-32.                                        |
| 60  | Lastrup et al., 2009         | 2002      | PT (ACR)    | Denmark | Lastrup H, Voss A, Green A, Junker P. Occurrence of systemic lupus erythematosus in a Danish community: an 8-year prospective study. <i>Scand J Rheumatol.</i> 2009 Mar-Apr;38(2):128-32.                                        |
| 103 | Voss et al., 1998            | 1995      | PT (ACR)    | Denmark | Voss A, Green A, Junker P. Systemic lupus erythematosus in Denmark: clinical and epidemiological characterization of a county-based cohort. <i>Scand J Rheumatol.</i> 1998;27(2):98-105.                                         |
| 25  | Guevara-Pacheco et al., 2016 | 2014      | PT (ACR)    | Ecuador | Guevara-Pacheco S, Feicán-Alvarado A, Sanín LH, et al. Prevalence of musculoskeletal disorders and rheumatic diseases in Cuenca, Ecuador: a WHO?ILAR COPCORD study <i>Rheumatol Int</i> 2016;36(9):1195-204.                     |
| 75  | Otsa et al., 2017            | 2006-2010 | PT (ACR)    | Estonia | Otsa K, Talli S, Harding P, Parsik E, Esko M, Teepere A, Tammaru M. Prevalence and incidence of systemic lupus erythematosus in the adult population of Estonia. <i>Lupus.</i> 2017 Sep;26(10):1115-1120.                        |
| 6   | Arnaud et al., 2014          | 2010      | PP (1 year) | France  | Arnaud L, Fagot JP, Mathian A, Païta M, Fagot-Campagna A, Amoura Z. Prevalence and incidence of systemic lupus erythematosus in France: a 2010 nation-wide population-based study. <i>Autoimmun Rev.</i> 2014 Nov;13(11):1082-9. |
| 36  | Deligny et al., 2002         | 1999      | PT (ACR)    | France  | Deligny C, Thomas L, Dubreuil F, Théodose C, Garsaud AM, Numéric P, Ranlin A, Jean-Baptiste G, Arfi S. Lupus systémique en Martinique: enquête                                                                                   |

|    |                         |      |             |         | épidémiologique [Systemic lupus erythematosus in Martinique: an epidemiologic study]. <i>Rev Med Interne</i> . 2002 Jan;23(1):21-9.                                                                                                                        |
|----|-------------------------|------|-------------|---------|------------------------------------------------------------------------------------------------------------------------------------------------------------------------------------------------------------------------------------------------------------|
| 1  | Brinks et al., 2014     | 2002 | PP (1 year) | Germany | Brinks R, Fischer-Betz R, Sander O, Richter JG, Chehab G, Schneider M. Age-specific prevalence of diagnosed systemic lupus erythematosus in Germany 2002 and projection to 2030. <i>Lupus</i> . 2014 Nov;23(13):1407-11.                                   |
| 2  | Schwarting et al., 2021 | 2009 | PP (1 year) | Germany | Schwarting A, Friedel H, Garal-Pantaler E, Pignot M, Wang X, Nab H, Desta B, Hammond ER. The Burden of Systemic Lupus Erythematosus in Germany: Incidence, Prevalence, and Healthcare Resource Utilization. <i>Rheumatol Ther</i> . 2021 Mar;8(1):375-393. |
| 2  | Schwarting et al., 2021 | 2010 | PP (1 year) | Germany | Schwarting A, Friedel H, Garal-Pantaler E, Pignot M, Wang X, Nab H, Desta B, Hammond ER. The Burden of Systemic Lupus Erythematosus in Germany: Incidence, Prevalence, and Healthcare Resource Utilization. <i>Rheumatol Ther</i> . 2021 Mar;8(1):375-393. |
| 2  | Schwarting et al., 2021 | 2011 | PP (1 year) | Germany | Schwarting A, Friedel H, Garal-Pantaler E, Pignot M, Wang X, Nab H, Desta B, Hammond ER. The Burden of Systemic Lupus Erythematosus in Germany: Incidence, Prevalence, and Healthcare Resource Utilization. <i>Rheumatol Ther</i> . 2021 Mar;8(1):375-393. |
| 2  | Schwarting et al., 2021 | 2012 | PP (1 year) | Germany | Schwarting A, Friedel H, Garal-Pantaler E, Pignot M, Wang X, Nab H, Desta B, Hammond ER. The Burden of Systemic Lupus Erythematosus in Germany: Incidence, Prevalence, and Healthcare Resource Utilization. <i>Rheumatol Ther</i> . 2021 Mar;8(1):375-393. |
| 2  | Schwarting et al., 2021 | 2013 | PP (1 year) | Germany | Schwarting A, Friedel H, Garal-Pantaler E, Pignot M, Wang X, Nab H, Desta B, Hammond ER. The Burden of Systemic Lupus Erythematosus in Germany: Incidence, Prevalence, and Healthcare Resource Utilization. <i>Rheumatol Ther</i> . 2021 Mar;8(1):375-393. |
| 2  | Schwarting et al., 2021 | 2014 | PP (1 year) | Germany | Schwarting A, Friedel H, Garal-Pantaler E, Pignot M, Wang X, Nab H, Desta B, Hammond ER. The Burden of Systemic Lupus Erythematosus in Germany: Incidence, Prevalence, and Healthcare Resource Utilization. <i>Rheumatol Ther</i> . 2021 Mar;8(1):375-393. |
| 94 | Brinks et al., 2016     | 2002 | PT          | Germany | Brinks R, Hoyer A, Weber S, Fischer-Betz R, Sander O, Richter JG, Chehab G, Schneider M. Age-specific and sex-specific incidence of systemic lupus                                                                                                         |

|    |                         |      |                   |         |                                                                                                                                                                                                                                                                                                                                                                                           |
|----|-------------------------|------|-------------------|---------|-------------------------------------------------------------------------------------------------------------------------------------------------------------------------------------------------------------------------------------------------------------------------------------------------------------------------------------------------------------------------------------------|
|    |                         |      |                   |         | erythematosus: an estimate from cross-sectional claims data of 2.3 million people in the German statutory health insurance 2002. <i>Lupus Sci Med</i> . 2016 Nov 25;3(1):e000181.                                                                                                                                                                                                         |
| 4  | Alamanos et al. 2003    | 2001 | PT (ACR)          | Greece  | Alamanos Y, Voulgari PV, Siozos C, Katsimpri P, Tsintzos S, Dimou G, Politi EN, Rapti A, Laina G, Drosos AA. Epidemiology of systemic lupus erythematosus in northwest Greece 1982-2001. <i>J Rheumatol</i> . 2003 Apr;30(4):731-5.                                                                                                                                                       |
| 44 | Gergianaki et al., 2017 | 1999 | PP (1 year) (ACR) | Greece  | Gergianaki I, Fanouriakis A, Repa A, Tzanakakis M, Adamichou C, Pompieri A, Spirou G, Bertsias A, Kabouraki E, Tzanakis I, Chatzi L, Sidiropoulos P, Boumpas DT, Bertsias GK. Epidemiology and burden of systemic lupus erythematosus in a Southern European population: data from the community-based lupus registry of Crete, Greece. <i>Ann Rheum Dis</i> . 2017 Dec;76(12):1992-2000. |
| 44 | Gergianaki et al., 2017 | 2013 | PP (1 year) (ACR) | Greece  | Gergianaki I, Fanouriakis A, Repa A, Tzanakakis M, Adamichou C, Pompieri A, Spirou G, Bertsias A, Kabouraki E, Tzanakis I, Chatzi L, Sidiropoulos P, Boumpas DT, Bertsias GK. Epidemiology and burden of systemic lupus erythematosus in a Southern European population: data from the community-based lupus registry of Crete, Greece. <i>Ann Rheum Dis</i> . 2017 Dec;76(12):1992-2000. |
| 97 | Kedves et al., 2020     | 2010 | PP (1 year)       | Hungary | Kedves M, Kósa F, Kunovszki P, Takács P, Szabó MZ, Karyekar C, Lofland JH, Nagy G. Large-scale mortality gap between SLE and control population is associated with increased infection-related mortality in lupus. <i>Rheumatology (Oxford)</i> . 2020 Nov 1;59(11):3443-3451.                                                                                                            |
| 97 | Kedves et al., 2020     | 2011 | PP (1 year)       | Hungary | Kedves M, Kósa F, Kunovszki P, Takács P, Szabó MZ, Karyekar C, Lofland JH, Nagy G. Large-scale mortality gap between SLE and control population is associated with increased infection-related mortality in lupus. <i>Rheumatology (Oxford)</i> . 2020 Nov 1;59(11):3443-3451.                                                                                                            |
| 97 | Kedves et al., 2020     | 2012 | PP (1 year)       | Hungary | Kedves M, Kósa F, Kunovszki P, Takács P, Szabó MZ, Karyekar C, Lofland JH, Nagy G. Large-scale mortality gap between SLE and control population is associated with increased infection-related mortality in lupus. <i>Rheumatology (Oxford)</i> . 2020 Nov 1;59(11):3443-3451.                                                                                                            |
| 97 | Kedves et al., 2020     | 2013 | PP (1 year)       | Hungary | Kedves M, Kósa F, Kunovszki P, Takács P, Szabó MZ, Karyekar C, Lofland JH, Nagy G. Large-scale mortality gap between SLE and control population is associated                                                                                                                                                                                                                             |

|    |                        |           |             |         |                                                                                                                                                                                                                                                                                                                                                                                                    |
|----|------------------------|-----------|-------------|---------|----------------------------------------------------------------------------------------------------------------------------------------------------------------------------------------------------------------------------------------------------------------------------------------------------------------------------------------------------------------------------------------------------|
| 97 | Kedves et al., 2020    | 2014      | PP (1 year) | Hungary | with increased infection-related mortality in lupus. <i>Rheumatology (Oxford)</i> . 2020 Nov 1;59(11):3443-3451.<br>Kedves M, Kósa F, Kunovszki P, Takács P, Szabó MZ, Karyekar C, Lofland JH, Nagy G. Large-scale mortality gap between SLE and control population is associated with increased infection-related mortality in lupus. <i>Rheumatology (Oxford)</i> . 2020 Nov 1;59(11):3443-3451. |
| 97 | Kedves et al., 2020    | 2015      | PP (1 year) | Hungary | Kedves M, Kósa F, Kunovszki P, Takács P, Szabó MZ, Karyekar C, Lofland JH, Nagy G. Large-scale mortality gap between SLE and control population is associated with increased infection-related mortality in lupus. <i>Rheumatology (Oxford)</i> . 2020 Nov 1;59(11):3443-3451.                                                                                                                     |
| 97 | Kedves et al., 2020    | 2016      | PP (1 year) | Hungary | Kedves M, Kósa F, Kunovszki P, Takács P, Szabó MZ, Karyekar C, Lofland JH, Nagy G. Large-scale mortality gap between SLE and control population is associated with increased infection-related mortality in lupus. <i>Rheumatology (Oxford)</i> . 2020 Nov 1;59(11):3443-3451.                                                                                                                     |
| 26 | Chopra et al., 2015    | 2004-2010 | PT          | India   | Chopra A. Disease burden of rheumatic diseases in India: COPCORD prespective. <i>Indian J Rheumatol</i> 2015;10:70-77.                                                                                                                                                                                                                                                                             |
| 66 | Malaviya et al., 1993  | 1990      | PT          | India   | Malaviya AN, Singh RR, Singh YN, Kapoor SK, Kumar A. Prevalence of systemic lupus erythematosus in India. <i>Lupus</i> . 1993 Apr;2(2):115-8.                                                                                                                                                                                                                                                      |
| 27 | Davatchi et al., 2016  | 2004      | PT          | Iran    | Davatchi F, Sandoughi M, Moghimi N, Jamshidi AR, Tehrani Banihashemi A, Zakeri Z, Sadeghi Abdollahi B. Epidemiology of rheumatic diseases in Iran from analysis of four COPCORD studies. <i>Int J Rheum Dis</i> . 2016 Nov;19(11):1056-1062.                                                                                                                                                       |
| 28 | Moghimi et al., 2015   | 2011-2012 | PT          | Iran    | Moghimi N, Davatchi F, Rahimi E, Saidi A, Rashadmanesh N, Moghimi S, Ghafori H, Zandi P, Ahmadi N, Ghafori H, Moghimi M, hajiheshmati M. WHO-ILAR COPCORD study (stage 1, urban study) in Sanandaj, Iran. <i>Clin Rheumatol</i> . 2015 Mar;34(3):535-43.                                                                                                                                           |
| 29 | Sandoughi et al., 2013 | 2008-2009 | PT (ACR)    | Iran    | Sandoughi M, Zakeri Z, Tehrani Banihashemi A, Davatchi F, Narouie B, Shikhzadeh A, Mohammadi M, Jahantigh M, Shakiba M, Moulaei NA, Yousefi S, Rezazehi B, Shirzaei Sani E, Emamdadi A, Hoseynian M, Masoodian S, Shahbakhsh S. Prevalence of musculoskeletal disorders in southeastern Iran: a                                                                                                    |

|    |                       |           |                   |            |                                                                                                                                                                                                                                                                                                                                                                                                                                                                                                                                              |
|----|-----------------------|-----------|-------------------|------------|----------------------------------------------------------------------------------------------------------------------------------------------------------------------------------------------------------------------------------------------------------------------------------------------------------------------------------------------------------------------------------------------------------------------------------------------------------------------------------------------------------------------------------------------|
| 30 | Davatchi et al., 2009 | 2006      | PT                | Iran       | WHO-ILAR COPCORD study (stage 1, urban study). <i>Int J Rheum Dis.</i> 2013 Oct;16(5):509-17.<br>Davatchi F, Tehrani Banihashemi A, Gholami J, Faezi ST, Forouzanfar MH, Salesi M, Karimifar M, Essalatmanesh K, Barghamdi M, Noorolahzadeh E, Dahaghin S, Rasker JJ. The prevalence of musculoskeletal complaints in a rural area in Iran: a WHO-ILAR COPCORD study (stage 1, rural study) in Iran. <i>Clin Rheumatol.</i> 2009 Nov;28(11):1267-74.                                                                                         |
| 31 | Davatchi et al., 2009 | 2004-2005 | PT                | Iran       | Davatchi F, Jamshidi AR, Tehrani Banihashemi A, Gholami J, Hossein Forouzanfar M, Akhlaghi M, Barghamdi M, Noorolahzadeh E, Khabazi AR, Salesi M, Salari AH, Karimifar M, Essalat-Manesh K, Hajjaliloo M, Soroosh M, Farzad F, Moussavi HR, Samadi F, Ghaznavi K, Asgharifard H, Zangiabadi AH, Shahram F, Nadji A, Akbarian M, Gharibdoost F, Rasker JJ. Effect of ethnic origin (Caucasians versus Turks) on the prevalence of rheumatic diseases: a WHO-ILAR COPCORD urban study in Iran. <i>Clin Rheumatol.</i> 2009 Nov;28(11):1275-82. |
| 9  | Benucci et al., 2005  | 2002      | PT                | Italy      | Benucci M, Del Rosso A, Li Gobbi F, Manfredi M, Cerinic MM, Salvarani C. Systemic lupus erythematosus (SLE) in Italy: an Italian prevalence study based on a two-step strategy in an area of Florence (Scandicci-Le Signe). <i>Med Sci Monit.</i> 2005 Sep;11(9):CR420-5.                                                                                                                                                                                                                                                                    |
| 47 | Govoni et al., 2006   | 2002      | PP (1 year) (ACR) | Italy      | Govoni M, Castellino G, Bosi S, Napoli N, Trotta F. Incidence and prevalence of systemic lupus erythematosus in a district of north Italy. <i>Lupus.</i> 2006;15(2):110-3.                                                                                                                                                                                                                                                                                                                                                                   |
| 85 | Tsioni et al., 2015   | 2009-2012 | PT (ACR)          | Italy      | Tsioni V, Andreoli L, Meini A, Frassi M, Raffetti E, Airò P, Allegri F, Donato F, Tincani A. The prevalence and incidence of systemic lupus erythematosus in children and adults: a population-based study in a mountain community in northern Italy. <i>Clin Exp Rheumatol.</i> 2015 Sep-Oct;33(5):681-7.                                                                                                                                                                                                                                   |
| 54 | Iseki et al., 1994    | 1982-1991 | PP (1 year) (ARA) | Japan      | Iseki K, Miyasato F, Oura T, Uehara H, Nishime K, Fukiyama K. An epidemiologic analysis of end-stage lupus nephritis. <i>Am J Kidney Dis.</i> 1994 Apr;23(4):547-54.                                                                                                                                                                                                                                                                                                                                                                         |
| 72 | Nasonov et al., 2014  | 2010      | PP (1 year) (ACR) | Kazakhstan | Nasonov E, Soloviev S, Davidson JE, Lila A, Ivanova R, Togizbayev G, Omarbekova Z, Shevchuk S, Iaremenko O, Gnylorybov A, Smailova Z, Chernogolov V, Malynovska K, Vasylyev A, Pereira MH. The prevalence and                                                                                                                                                                                                                                                                                                                                |

|   |                  |      |             |       | incidence of systemic lupus erythematosus (SLE) in selected cities from three Commonwealth of Independent States countries (the Russian Federation, Ukraine and Kazakhstan). <i>Lupus</i> . 2014 Feb;23(2):213-9.                                                  |
|---|------------------|------|-------------|-------|--------------------------------------------------------------------------------------------------------------------------------------------------------------------------------------------------------------------------------------------------------------------|
| 7 | Bae et al., 2020 | 2005 | PP (1 year) | Korea | Bae EH, Lim SY, Han KD, Jung JH, Choi HS, Kim HY, Kim CS, Ma SK, Kim SW. Trend of prevalence and incidence of systemic lupus erythematosus in South Korea, 2005 to 2015: a nationwide population-based study. <i>Korean J Intern Med</i> . 2020 May;35(3):652-661. |
| 7 | Bae et al., 2020 | 2006 | PP (1 year) | Korea | Bae EH, Lim SY, Han KD, Jung JH, Choi HS, Kim HY, Kim CS, Ma SK, Kim SW. Trend of prevalence and incidence of systemic lupus erythematosus in South Korea, 2005 to 2015: a nationwide population-based study. <i>Korean J Intern Med</i> . 2020 May;35(3):652-661. |
| 7 | Bae et al., 2020 | 2007 | PP (1 year) | Korea | Bae EH, Lim SY, Han KD, Jung JH, Choi HS, Kim HY, Kim CS, Ma SK, Kim SW. Trend of prevalence and incidence of systemic lupus erythematosus in South Korea, 2005 to 2015: a nationwide population-based study. <i>Korean J Intern Med</i> . 2020 May;35(3):652-661. |
| 7 | Bae et al., 2020 | 2008 | PP (1 year) | Korea | Bae EH, Lim SY, Han KD, Jung JH, Choi HS, Kim HY, Kim CS, Ma SK, Kim SW. Trend of prevalence and incidence of systemic lupus erythematosus in South Korea, 2005 to 2015: a nationwide population-based study. <i>Korean J Intern Med</i> . 2020 May;35(3):652-661. |
| 7 | Bae et al., 2020 | 2009 | PP (1 year) | Korea | Bae EH, Lim SY, Han KD, Jung JH, Choi HS, Kim HY, Kim CS, Ma SK, Kim SW. Trend of prevalence and incidence of systemic lupus erythematosus in South Korea, 2005 to 2015: a nationwide population-based study. <i>Korean J Intern Med</i> . 2020 May;35(3):652-661. |
| 7 | Bae et al., 2020 | 2010 | PP (1 year) | Korea | Bae EH, Lim SY, Han KD, Jung JH, Choi HS, Kim HY, Kim CS, Ma SK, Kim SW. Trend of prevalence and incidence of systemic lupus erythematosus in South Korea, 2005 to 2015: a nationwide population-based study. <i>Korean J Intern Med</i> . 2020 May;35(3):652-661. |
| 7 | Bae et al., 2020 | 2011 | PP (1 year) | Korea | Bae EH, Lim SY, Han KD, Jung JH, Choi HS, Kim HY, Kim CS, Ma SK, Kim SW. Trend of prevalence and incidence of systemic lupus erythematosus in South Korea, 2005 to 2015: a nationwide population-based study. <i>Korean J Intern Med</i> . 2020 May;35(3):652-661. |

|    |                    |      |             |       |                                                                                                                                                                                                                                                                   |
|----|--------------------|------|-------------|-------|-------------------------------------------------------------------------------------------------------------------------------------------------------------------------------------------------------------------------------------------------------------------|
| 7  | Bae et al., 2020   | 2012 | PP (1 year) | Korea | Bae EH, Lim SY, Han KD, Jung JH, Choi HS, Kim HY, Kim CS, Ma SK, Kim SW. Trend of prevalence and incidence of systemic lupus erythematosus in South Korea, 2005 to 2015: a nationwide population-based study. <i>Korean J Intern Med.</i> 2020 May;35(3):652-661. |
| 7  | Bae et al., 2020   | 2013 | PP (1 year) | Korea | Bae EH, Lim SY, Han KD, Jung JH, Choi HS, Kim HY, Kim CS, Ma SK, Kim SW. Trend of prevalence and incidence of systemic lupus erythematosus in South Korea, 2005 to 2015: a nationwide population-based study. <i>Korean J Intern Med.</i> 2020 May;35(3):652-661. |
| 7  | Bae et al., 2020   | 2014 | PP (1 year) | Korea | Bae EH, Lim SY, Han KD, Jung JH, Choi HS, Kim HY, Kim CS, Ma SK, Kim SW. Trend of prevalence and incidence of systemic lupus erythematosus in South Korea, 2005 to 2015: a nationwide population-based study. <i>Korean J Intern Med.</i> 2020 May;35(3):652-661. |
| 7  | Bae et al., 2020   | 2015 | PP (1 year) | Korea | Bae EH, Lim SY, Han KD, Jung JH, Choi HS, Kim HY, Kim CS, Ma SK, Kim SW. Trend of prevalence and incidence of systemic lupus erythematosus in South Korea, 2005 to 2015: a nationwide population-based study. <i>Korean J Intern Med.</i> 2020 May;35(3):652-661. |
| 14 | Chung et al., 2021 | 2009 | PP (1 year) | Korea | Chung MK, Park JS, Lim H, Lee CH, Lee J. Incidence and prevalence of systemic lupus erythematosus among Korean women in childbearing years: A nationwide population-based study. <i>Lupus.</i> 2021 Apr;30(4):674-679.                                            |
| 14 | Chung et al., 2021 | 2010 | PP (1 year) | Korea | Chung MK, Park JS, Lim H, Lee CH, Lee J. Incidence and prevalence of systemic lupus erythematosus among Korean women in childbearing years: A nationwide population-based study. <i>Lupus.</i> 2021 Apr;30(4):674-679.                                            |
| 14 | Chung et al., 2021 | 2011 | PP (1 year) | Korea | Chung MK, Park JS, Lim H, Lee CH, Lee J. Incidence and prevalence of systemic lupus erythematosus among Korean women in childbearing years: A nationwide population-based study. <i>Lupus.</i> 2021 Apr;30(4):674-679.                                            |
| 14 | Chung et al., 2021 | 2012 | PP (1 year) | Korea | Chung MK, Park JS, Lim H, Lee CH, Lee J. Incidence and prevalence of systemic lupus erythematosus among Korean women in childbearing years: A nationwide population-based study. <i>Lupus.</i> 2021 Apr;30(4):674-679.                                            |
| 14 | Chung et al., 2021 | 2013 | PP (1 year) | Korea | Chung MK, Park JS, Lim H, Lee CH, Lee J. Incidence and prevalence of systemic lupus erythematosus among Korean women in childbearing years: A nationwide population-based study. <i>Lupus.</i> 2021 Apr;30(4):674-679.                                            |

|    |                        |           |                   |           |                                                                                                                                                                                                                         |
|----|------------------------|-----------|-------------------|-----------|-------------------------------------------------------------------------------------------------------------------------------------------------------------------------------------------------------------------------|
| 14 | Chung et al., 2021     | 2014      | PP (1 year)       | Korea     | Chung MK, Park JS, Lim H, Lee CH, Lee J. Incidence and prevalence of systemic lupus erythematosus among Korean women in childbearing years: A nationwide population-based study. <i>Lupus</i> . 2021 Apr;30(4):674-679. |
| 14 | Chung et al., 2021     | 2015      | PP (1 year)       | Korea     | Chung MK, Park JS, Lim H, Lee CH, Lee J. Incidence and prevalence of systemic lupus erythematosus among Korean women in childbearing years: A nationwide population-based study. <i>Lupus</i> . 2021 Apr;30(4):674-679. |
| 14 | Chung et al., 2021     | 2016      | PP (1 year)       | Korea     | Chung MK, Park JS, Lim H, Lee CH, Lee J. Incidence and prevalence of systemic lupus erythematosus among Korean women in childbearing years: A nationwide population-based study. <i>Lupus</i> . 2021 Apr;30(4):674-679. |
| 57 | Ju et al., 2014        | 2004-2006 | PT (ACR)          | Korea     | Ju JH, Yoon SH, Kang KY, Kim IJ, Kwok SK, Park SH, Kim HY, Lee WC, Cho CS. Prevalence of systemic lupus erythematosus in South Korea: an administrative database study. <i>J Epidemiol</i> . 2014;24(4):295-303.        |
| 58 | Kwak et al., 2021      | 2017      | PP (1 year) (ACR) | Korea     | Kwak SG, Park SH, Kim JY. Incidence and Prevalence of Juvenile Systemic Lupus Erythematosus in Korea: Data From the 2017 National Health Claims Database. <i>J Rheumatol</i> . 2021 Feb;48(2):258-261.                  |
| 80 | Shim et al., 2014      | 2006      | PP (1 year) (ACR) | Korea     | Shim JS, Sung YK, Joo YB, Lee HS, Bae SC. Prevalence and incidence of systemic lupus erythematosus in South Korea. <i>Rheumatol Int</i> . 2014 Jul;34(7):909-17.                                                        |
| 80 | Shim et al., 2014      | 2007      | PP (1 year) (ACR) | Korea     | Shim JS, Sung YK, Joo YB, Lee HS, Bae SC. Prevalence and incidence of systemic lupus erythematosus in South Korea. <i>Rheumatol Int</i> . 2014 Jul;34(7):909-17.                                                        |
| 80 | Shim et al., 2014      | 2008      | PP (1 year) (ACR) | Korea     | Shim JS, Sung YK, Joo YB, Lee HS, Bae SC. Prevalence and incidence of systemic lupus erythematosus in South Korea. <i>Rheumatol Int</i> . 2014 Jul;34(7):909-17.                                                        |
| 80 | Shim et al., 2014      | 2009      | PP (1 year) (ACR) | Korea     | Shim JS, Sung YK, Joo YB, Lee HS, Bae SC. Prevalence and incidence of systemic lupus erythematosus in South Korea. <i>Rheumatol Int</i> . 2014 Jul;34(7):909-17.                                                        |
| 80 | Shim et al., 2014      | 2010      | PP (1 year) (ACR) | Korea     | Shim JS, Sung YK, Joo YB, Lee HS, Bae SC. Prevalence and incidence of systemic lupus erythematosus in South Korea. <i>Rheumatol Int</i> . 2014 Jul;34(7):909-17.                                                        |
| 16 | Dadoniene et al., 2006 | 2004      | PT (ACR)          | Lithuania | Dadoniene J, Adomaviciute D, Ruginiene R, Luksiene A, Venalis A. The prevalence of systemic lupus erythematosus in Lithuania: the lowest rate in Northern Europe. <i>Lupus</i> . 2006;15(8):544-6.                      |



|     |                                       |           |                   |             |                                                                                                                                                                                                                                                                                                                                                                                                                                |
|-----|---------------------------------------|-----------|-------------------|-------------|--------------------------------------------------------------------------------------------------------------------------------------------------------------------------------------------------------------------------------------------------------------------------------------------------------------------------------------------------------------------------------------------------------------------------------|
| 95  | Magro et al., 2018                    | 2012-2016 | PT (SLICC)        | Malta       | Magro R, Borg AA. Characterisation of Patients with Systemic Lupus Erythematosus in Malta: A Population Based Cohort Cross-Sectional Study. <i>Biomed Res Int.</i> 2018 Sep 30;2018:2385386.                                                                                                                                                                                                                                   |
| 32  | Del Río Nájera et al., 2016           | 2014-2015 | PT                | Mexico      | Del Río Nájera D, González-Chávez SA, Quiñonez-Flores CM, Peláez-Ballestas I, Hernández-Nájera N, Pacheco-Tena CF. Rheumatic Diseases in Chihuahua, México: A COPCORD Survey. <i>J Clin Rheumatol.</i> 2016 Jun;22(4):188-93.                                                                                                                                                                                                  |
| 33  | Alvarez-Nemegyei et al., 2005<br>2011 |           | PT (ACR)          | Mexico      | Alvarez-Nemegyei J, Peláez-Ballestas I, Sanin LH, Cardiel MH, Ramirez-Angulo A, Goycochea-Robles MV. Prevalence of musculoskeletal pain and rheumatic diseases in the southeastern region of Mexico. A COPCORD-based community survey. <i>J Rheumatol Suppl.</i> 2011 Jan;86:21-5.                                                                                                                                             |
| 34  | Peláez-Ballestas et al., 2011         | 2005      | PT                | Mexico      | Peláez-Ballestas I, Sanin LH, Moreno-Montoya J, Alvarez-Nemegyei J, Burgos-Vargas R, Garza-Elizondo M, Rodríguez-Amado J, Goycochea-Robles MV, Madariaga M, Zamudio J, Santana N, Cardiel MH; Grupo de Estudio Epidemiológico de Enfermedades Músculo Articulares (GEEMA). Epidemiology of the rheumatic diseases in Mexico. A study of 5 regions based on the COPCORD methodology. <i>J Rheumatol Suppl.</i> 2011 Jan;86:3-8. |
| 108 | Nossent et al., 1992                  | 1990      | PT (ARA)          | Netherlands | Nossent JC. Systemic lupus erythematosus on the Caribbean island of Curaçao: an epidemiological investigation. <i>Ann Rheum Dis.</i> 1992 Nov;51(11):1197-201.                                                                                                                                                                                                                                                                 |
| 62  | Lerang et al., 2012                   | 2008      | PT (ACR)          | Norway      | Lerang K, Gilboe I, Garen T, Thelle DS, Gran JT. High incidence and prevalence of systemic lupus erythematosus in Norway. <i>Lupus.</i> 2012 Oct;21(12):1362-9.                                                                                                                                                                                                                                                                |
| 102 | Nossent et al., 2001                  | 1978-1996 | PT (ACR)          | Norway      | Nossent HC. Systemic lupus erythematosus in the Arctic region of Norway. <i>J Rheumatol.</i> 2001 Mar;28(3):539-46.                                                                                                                                                                                                                                                                                                            |
| 69  | Molina et al., 2007                   | 2003      | PP (1 year)       | Puerto Rico | Molina MJ, Mayor AM, Franco AE, Morell CA, López MA, Vilá LM. Prevalence of systemic lupus erythematosus and associated comorbidities in Puerto Rico. <i>J Clin Rheumatol.</i> 2007 Aug;13(4):202-4.                                                                                                                                                                                                                           |
| 72  | Nasonov et al., 2014                  | 2010      | PP (1 year) (ACR) | Russia      | Nasonov E, Soloviev S, Davidson JE, Lila A, Ivanova R, Togizbayev G, Omarbekova Z, Shevchuk S, Iaremenko O, Gnylorybov A, Smailova Z, Chernogolov V, Malynovska K, Vasylyev A, Pereira MH. The prevalence and incidence of systemic lupus erythematosus (SLE) in selected cities from three                                                                                                                                    |

|     |                               |           |            |              |                                                                                                                                                                                                                                                                                                                                                                                                                                                                                                |
|-----|-------------------------------|-----------|------------|--------------|------------------------------------------------------------------------------------------------------------------------------------------------------------------------------------------------------------------------------------------------------------------------------------------------------------------------------------------------------------------------------------------------------------------------------------------------------------------------------------------------|
|     |                               |           |            |              | Commonwealth of Independent States countries (the Russian Federation, Ukraine and Kazakhstan). <i>Lupus</i> . 2014 Feb;23(2):213-9.                                                                                                                                                                                                                                                                                                                                                            |
| 110 | Al-Arfaj et al., 2002         | NR        | PT (ACR)   | Saudi Arabia | Al-Arfaj AS, Al-Balla SR, Al-Dalaan AN, Al-Saleh SS, Bahabri SA, Mousa MM, Sekeit MA. Prevalence of systemic lupus erythematosus in central Saudi Arabia. <i>Saudi Med J</i> . 2002 Jan;23(1):87-9.                                                                                                                                                                                                                                                                                            |
| 5   | Alonso et al., 2011           | 1987-1991 | PT (ACR)   | Spain        | Alonso MD, Llorca J, Martinez-Vazquez F, Miranda-Fillooy JA, Diaz de Teran T, Dierssen T, Vazquez-Rodriguez TR, Gomez-Acebo I, Blanco R, Gonzalez-Gay MA. Systemic lupus erythematosus in northwestern Spain: a 20-year epidemiologic study. <i>Medicine (Baltimore)</i> . 2011 Sep;90(5):350-358.                                                                                                                                                                                             |
| 15  | Cortés Verdú et al., 2020     | 2016-2017 | PT (SLICC) | Spain        | Cortés Verdú R, Pego-Reigosa JM, Seoane-Mato D, Morcillo Valle M, Palma Sánchez D, Moreno Martínez MJ, Mayor González M, Atxotegi Sáenz de Buruaga J, Urionagüena Onaindia I, Blanco Cáceres BA, Silva-Fernández L, Sivera F, Blanco FJ, Sánchez-Piedra C, Díaz-González F, Bustabad S; Working Group Proyecto EPISER2016. Prevalence of systemic lupus erythematosus in Spain: higher than previously reported in other countries? <i>Rheumatology (Oxford)</i> . 2020 Sep 1;59(9):2556-2562. |
| 106 | López et al., 2003            | 1998-2002 | PT (ACR)   | Spain        | López P, Mozo L, Gutiérrez C, Suárez A. Epidemiology of systemic lupus erythematosus in a northern Spanish population: gender and age influence on immunological features. <i>Lupus</i> . 2003;12(11):860-5.                                                                                                                                                                                                                                                                                   |
| 53  | Ingvarsson et al., 2016       | 1993      | PT (ACR)   | Sweden       | Ingvarsson RF, Bengtsson AA, Jönsen A. Variations in the epidemiology of systemic lupus erythematosus in southern Sweden. <i>Lupus</i> . 2016 Jun;25(7):772-80.                                                                                                                                                                                                                                                                                                                                |
| 53  | Ingvarsson et al., 2016       | 2006      | PT (ACR)   | Sweden       | Ingvarsson RF, Bengtsson AA, Jönsen A. Variations in the epidemiology of systemic lupus erythematosus in southern Sweden. <i>Lupus</i> . 2016 Jun;25(7):772-80.                                                                                                                                                                                                                                                                                                                                |
| 81  | Simard et al., 2014           | 2010      | PT         | Sweden       | Simard JF, Sjöwall C, Rönnblom L, Jönsen A, Svenungsson E. Systemic lupus erythematosus prevalence in Sweden in 2010: what do national registers say? <i>Arthritis Care Res (Hoboken)</i> . 2014 Nov;66(11):1710-7.                                                                                                                                                                                                                                                                            |
| 104 | Ståhl-Hallengren et al., 2000 | 1986      | PT (ACR)   | Sweden       | Ståhl-Hallengren C, Jönsen A, Nived O, Sturfelt G. Incidence studies of systemic lupus erythematosus in Southern Sweden: increasing age, decreasing                                                                                                                                                                                                                                                                                                                                            |

|     |                               |           |                   |                      |                                                                                                                                                                                                                                                                                                                                                                                                                                |
|-----|-------------------------------|-----------|-------------------|----------------------|--------------------------------------------------------------------------------------------------------------------------------------------------------------------------------------------------------------------------------------------------------------------------------------------------------------------------------------------------------------------------------------------------------------------------------|
| 104 | Ståhl-Hallengren et al., 2000 | 1991      | PT (ACR)          | Sweden               | frequency of renal manifestations and good prognosis. <i>J Rheumatol.</i> 2000 Mar;27(3):685-91.<br>Ståhl-Hallengren C, Jönsen A, Nived O, Sturfelt G. Incidence studies of systemic lupus erythematosus in Southern Sweden: increasing age, decreasing frequency of renal manifestations and good prognosis. <i>J Rheumatol.</i> 2000 Mar;27(3):685-91.                                                                       |
| 76  | Pamuk et al., 2016            | 2003-2014 | PP (1 year) (ACR) | Turkey               | Pamuk ON, Balci MA, Donmez S, Tsokos GC. The incidence and prevalence of systemic lupus erythematosus in Thrace, 2003-2014: A 12-year epidemiological study. <i>Lupus.</i> 2016 Jan;25(1):102-9.                                                                                                                                                                                                                               |
| 76  | Pamuk et al., 2016            | 2003-2014 | PT (ACR)          | Turkey               | Pamuk ON, Balci MA, Donmez S, Tsokos GC. The incidence and prevalence of systemic lupus erythematosus in Thrace, 2003-2014: A 12-year epidemiological study. <i>Lupus.</i> 2016 Jan;25(1):102-9.                                                                                                                                                                                                                               |
| 72  | Nasonov et al., 2014          | 2010      | PP (1 year) (ACR) | Ukraine              | Nasonov E, Soloviev S, Davidson JE, Lila A, Ivanova R, Togizbayev G, Omarbekova Z, Shevchuk S, Iaremenko O, Gnylorybov A, Smailova Z, Chernogolov V, Malynovska K, Vasylyev A, Pereira MH. The prevalence and incidence of systemic lupus erythematosus (SLE) in selected cities from three Commonwealth of Independent States countries (the Russian Federation, Ukraine and Kazakhstan). <i>Lupus.</i> 2014 Feb;23(2):213-9. |
| 3   | Al Dhanhani et al., 2017      | 2009-2012 | PT (ACR)          | United Arab Emirates | Al Dhanhani AM, Agarwal M, Othman YS, Bakoush O. Incidence and prevalence of systemic lupus erythematosus among the native Arab population in UAE. <i>Lupus.</i> 2017 May;26(6):664-669.                                                                                                                                                                                                                                       |
| 46  | Gourley et al., 1997          | 1993      | PT                | United Kingdom       | Gourley IS, Patterson CC, Bell AL. The prevalence of systemic lupus erythematosus in Northern Ireland. <i>Lupus.</i> 1997;6(4):399-403.                                                                                                                                                                                                                                                                                        |
| 51  | Hopkinson et al., 1993        | 1989-1990 | PP (1 year)       | United Kingdom       | Hopkinson ND, Doherty M, Powell RJ. The prevalence and incidence of systemic lupus erythematosus in Nottingham, UK, 1989-1990. <i>Br J Rheumatol.</i> 1993 Feb;32(2):110-5.                                                                                                                                                                                                                                                    |
| 78  | Rees et al., 2016             | 1999      | PT                | United Kingdom       | Rees F, Doherty M, Grainge M, Davenport G, Lanyon P, Zhang W. The incidence and prevalence of systemic lupus erythematosus in the UK, 1999-2012. <i>Ann Rheum Dis.</i> 2016 Jan;75(1):136-41.                                                                                                                                                                                                                                  |

|    |                   |      |    |                |                                                                                                                                                                                               |
|----|-------------------|------|----|----------------|-----------------------------------------------------------------------------------------------------------------------------------------------------------------------------------------------|
| 78 | Rees et al., 2016 | 2000 | PT | United Kingdom | Rees F, Doherty M, Grainge M, Davenport G, Lanyon P, Zhang W. The incidence and prevalence of systemic lupus erythematosus in the UK, 1999-2012. <i>Ann Rheum Dis.</i> 2016 Jan;75(1):136-41. |
| 78 | Rees et al., 2016 | 2001 | PT | United Kingdom | Rees F, Doherty M, Grainge M, Davenport G, Lanyon P, Zhang W. The incidence and prevalence of systemic lupus erythematosus in the UK, 1999-2012. <i>Ann Rheum Dis.</i> 2016 Jan;75(1):136-41. |
| 78 | Rees et al., 2016 | 2002 | PT | United Kingdom | Rees F, Doherty M, Grainge M, Davenport G, Lanyon P, Zhang W. The incidence and prevalence of systemic lupus erythematosus in the UK, 1999-2012. <i>Ann Rheum Dis.</i> 2016 Jan;75(1):136-41. |
| 78 | Rees et al., 2016 | 2003 | PT | United Kingdom | Rees F, Doherty M, Grainge M, Davenport G, Lanyon P, Zhang W. The incidence and prevalence of systemic lupus erythematosus in the UK, 1999-2012. <i>Ann Rheum Dis.</i> 2016 Jan;75(1):136-41. |
| 78 | Rees et al., 2016 | 2004 | PT | United Kingdom | Rees F, Doherty M, Grainge M, Davenport G, Lanyon P, Zhang W. The incidence and prevalence of systemic lupus erythematosus in the UK, 1999-2012. <i>Ann Rheum Dis.</i> 2016 Jan;75(1):136-41. |
| 78 | Rees et al., 2016 | 2005 | PT | United Kingdom | Rees F, Doherty M, Grainge M, Davenport G, Lanyon P, Zhang W. The incidence and prevalence of systemic lupus erythematosus in the UK, 1999-2012. <i>Ann Rheum Dis.</i> 2016 Jan;75(1):136-41. |
| 78 | Rees et al., 2016 | 2006 | PT | United Kingdom | Rees F, Doherty M, Grainge M, Davenport G, Lanyon P, Zhang W. The incidence and prevalence of systemic lupus erythematosus in the UK, 1999-2012. <i>Ann Rheum Dis.</i> 2016 Jan;75(1):136-41. |
| 78 | Rees et al., 2016 | 2007 | PT | United Kingdom | Rees F, Doherty M, Grainge M, Davenport G, Lanyon P, Zhang W. The incidence and prevalence of systemic lupus erythematosus in the UK, 1999-2012. <i>Ann Rheum Dis.</i> 2016 Jan;75(1):136-41. |
| 78 | Rees et al., 2016 | 2008 | PT | United Kingdom | Rees F, Doherty M, Grainge M, Davenport G, Lanyon P, Zhang W. The incidence and prevalence of systemic lupus erythematosus in the UK, 1999-2012. <i>Ann Rheum Dis.</i> 2016 Jan;75(1):136-41. |
| 78 | Rees et al., 2016 | 2009 | PT | United Kingdom | Rees F, Doherty M, Grainge M, Davenport G, Lanyon P, Zhang W. The incidence and prevalence of systemic lupus erythematosus in the UK, 1999-2012. <i>Ann Rheum Dis.</i> 2016 Jan;75(1):136-41. |

|     |                          |           |                   |                |                                                                                                                                                                                                                                                                                            |
|-----|--------------------------|-----------|-------------------|----------------|--------------------------------------------------------------------------------------------------------------------------------------------------------------------------------------------------------------------------------------------------------------------------------------------|
| 78  | Rees et al., 2016        | 2010      | PT                | United Kingdom | Rees F, Doherty M, Grainge M, Davenport G, Lanyon P, Zhang W. The incidence and prevalence of systemic lupus erythematosus in the UK, 1999-2012. <i>Ann Rheum Dis.</i> 2016 Jan;75(1):136-41.                                                                                              |
| 78  | Rees et al., 2016        | 2011      | PT                | United Kingdom | Rees F, Doherty M, Grainge M, Davenport G, Lanyon P, Zhang W. The incidence and prevalence of systemic lupus erythematosus in the UK, 1999-2012. <i>Ann Rheum Dis.</i> 2016 Jan;75(1):136-41.                                                                                              |
| 78  | Rees et al., 2016        | 2012      | PT                | United Kingdom | Rees F, Doherty M, Grainge M, Davenport G, Lanyon P, Zhang W. The incidence and prevalence of systemic lupus erythematosus in the UK, 1999-2012. <i>Ann Rheum Dis.</i> 2016 Jan;75(1):136-41.                                                                                              |
| 79  | Samanta et al., 1992     | 1989      | PT (ARA)          | United Kingdom | Samanta A, Roy S, Feehally J, Symmons DP. The prevalence of diagnosed systemic lupus erythematosus in whites and Indian Asian immigrants in Leicester city, UK. <i>Br J Rheumatol.</i> 1992 Oct;31(10):679-82.                                                                             |
| 105 | Johnson et al., 1995     | 1992      | PT (ACR)          | United Kingdom | Johnson AE, Gordon C, Palmer RG, Bacon PA. The prevalence and incidence of systemic lupus erythematosus in Birmingham, England. Relationship to ethnicity and country of birth. <i>Arthritis Rheum.</i> 1995 Apr;38(4):551-8.                                                              |
| 8   | Balluz et al., 2001      | 1997      | PT (ACR)          | United States  | Balluz L, Philen R, Ortega L, Rosales C, Brock J, Barr D, Kieszak S. Investigation of systemic lupus erythematosus in Nogales, Arizona. <i>Am J Epidemiol.</i> 2001 Dec 1;154(11):1029-36.                                                                                                 |
| 12  | Chakravarty et al., 2007 | 2000      | PP (1 year)       | United States  | Chakravarty EF, Bush TM, Manzi S, Clarke AE, Ward MM. Prevalence of adult systemic lupus erythematosus in California and Pennsylvania in 2000: estimates obtained using hospitalization data. <i>Arthritis Rheum.</i> 2007 Jun;56(6):2092-4.                                               |
| 17  | Dall'Era et al., 2017    | 2007-2009 | PP (1 year) (ACR) | United States  | Dall'Era M, Cisternas MG, Snipes K, Herrinton LJ, Gordon C, Helmick CG. The Incidence and Prevalence of Systemic Lupus Erythematosus in San Francisco County, California: The California Lupus Surveillance Project. <i>Arthritis Rheumatol.</i> 2017 Oct;69(10):1996-2005.                |
| 39  | Feldman et al., 2013     | 2000-2004 | LT                | United States  | Feldman CH, Hiraki LT, Liu J, Fischer MA, Solomon DH, Alarcón GS, Winkelmayer WC, Costenbader KH. Epidemiology and sociodemographics of systemic lupus erythematosus and lupus nephritis among US adults with Medicaid coverage, 2000-2004. <i>Arthritis Rheum.</i> 2013 Mar;65(3):753-63. |

|    |                       |           |             |               |                                                                                                                                                                                                                                                                                                              |
|----|-----------------------|-----------|-------------|---------------|--------------------------------------------------------------------------------------------------------------------------------------------------------------------------------------------------------------------------------------------------------------------------------------------------------------|
| 41 | Ferucci et al., 2014  | 2007      | PP (1 year) | United States | Ferucci ED, Johnston JM, Gaddy JR, Sumner L, Posever JO, Choromanski TL, Gordon C, Lim SS, Helmick CG. Prevalence and incidence of systemic lupus erythematosus in a population-based registry of American Indian and Alaska Native people, 2007-2009. <i>Arthritis Rheumatol.</i> 2014 Sep;66(9):2494-502.  |
| 43 | Furst et al., 2013    | 2003      | PP (1 year) | United States | Furst DE, Clarke AE, Fernandes AW, Bancroft T, Greth W, Iorga SR. Incidence and prevalence of adult systemic lupus erythematosus in a large US managed-care population. <i>Lupus.</i> 2013 Jan;22(1):99-105.                                                                                                 |
| 43 | Furst et al., 2013    | 2004      | PP (1 year) | United States | Furst DE, Clarke AE, Fernandes AW, Bancroft T, Greth W, Iorga SR. Incidence and prevalence of adult systemic lupus erythematosus in a large US managed-care population. <i>Lupus.</i> 2013 Jan;22(1):99-105.                                                                                                 |
| 43 | Furst et al., 2013    | 2005      | PP (1 year) | United States | Furst DE, Clarke AE, Fernandes AW, Bancroft T, Greth W, Iorga SR. Incidence and prevalence of adult systemic lupus erythematosus in a large US managed-care population. <i>Lupus.</i> 2013 Jan;22(1):99-105.                                                                                                 |
| 43 | Furst et al., 2013    | 2006      | PP (1 year) | United States | Furst DE, Clarke AE, Fernandes AW, Bancroft T, Greth W, Iorga SR. Incidence and prevalence of adult systemic lupus erythematosus in a large US managed-care population. <i>Lupus.</i> 2013 Jan;22(1):99-105.                                                                                                 |
| 43 | Furst et al., 2013    | 2007      | PP (1 year) | United States | Furst DE, Clarke AE, Fernandes AW, Bancroft T, Greth W, Iorga SR. Incidence and prevalence of adult systemic lupus erythematosus in a large US managed-care population. <i>Lupus.</i> 2013 Jan;22(1):99-105.                                                                                                 |
| 43 | Furst et al., 2013    | 2008      | PP (1 year) | United States | Furst DE, Clarke AE, Fernandes AW, Bancroft T, Greth W, Iorga SR. Incidence and prevalence of adult systemic lupus erythematosus in a large US managed-care population. <i>Lupus.</i> 2013 Jan;22(1):99-105.                                                                                                 |
| 49 | Hiraki et al., 2012   | 2000-2004 | PP (1 year) | United States | Hiraki LT, Feldman CH, Liu J, Alarcón GS, Fischer MA, Winkelmayr WC, Costenbader KH. Prevalence, incidence, and demographics of systemic lupus erythematosus and lupus nephritis from 2000 to 2004 among children in the US Medicaid beneficiary population. <i>Arthritis Rheum.</i> 2012 Aug;64(8):2669-76. |
| 50 | Hochberg et al., 1995 | NR        | LT          | United States | Hochberg MC, Perlmutter DL, Medsger TA, Steen V, Weisman MH, White B, Wigley FM. Prevalence of self-reported physician-diagnosed systemic lupus erythematosus in the USA. <i>Lupus.</i> 1995 Dec;4(6):454-6.                                                                                                 |

|    |                          |           |                   |               |                                                                                                                                                                                                                                                                                                                                                                                   |
|----|--------------------------|-----------|-------------------|---------------|-----------------------------------------------------------------------------------------------------------------------------------------------------------------------------------------------------------------------------------------------------------------------------------------------------------------------------------------------------------------------------------|
| 50 | Hochberg et al., 1995    | NR        | LT (ACR)          | United States | Hochberg MC, Perlmutter DL, Medsger TA, Steen V, Weisman MH, White B, Wigley FM. Prevalence of self-reported physician-diagnosed systemic lupus erythematosus in the USA. <i>Lupus</i> . 1995 Dec;4(6):454-6.                                                                                                                                                                     |
| 52 | Housey et al., 2015      | 2002-2005 | PP (1 year) (ACR) | United States | Housey M, DeGuire P, Lyon-Callo S, Wang L, Marder W, McCune WJ, Helmick CG, Gordon C, Dhar JP, Leisen J, Somers EC. Incidence and prevalence of systemic lupus erythematosus among Arab and Chaldean Americans in southeastern Michigan: the Michigan Lupus Epidemiology and Surveillance Program. <i>Am J Public Health</i> . 2015 May;105(5):e74-9.                             |
| 55 | Izmirly et al., 2017     | 2007      | PP (1 year) (ACR) | United States | Izmirly PM, Wan I, Sahl S, Buyon JP, Belmont HM, Salmon JE, Askanase A, Bathon JM, Geraldino-Pardilla L, Ali Y, Ginzler EM, Putterman C, Gordon C, Helmick CG, Parton H. The Incidence and Prevalence of Systemic Lupus Erythematosus in New York County (Manhattan), New York: The Manhattan Lupus Surveillance Program. <i>Arthritis Rheumatol</i> . 2017 Oct;69(10):2006-2017. |
| 56 | Jarukitsopa et al., 2015 | 2006      | PT (ACR)          | United States | Jarukitsopa S, Hoganson DD, Crowson CS, Sokumbi O, Davis MD, Michet CJ Jr, Matteson EL, Maradit Kremers H, Chowdhary VR. Epidemiology of systemic lupus erythematosus and cutaneous lupus erythematosus in a predominantly white population in the United States. <i>Arthritis Care Res (Hoboken)</i> . 2015 May;67(6):817-28.                                                    |
| 59 | Lahita et al., 1995      | NR        | LT                | United States | Lahita RG. Special report: adjusted lupus prevalence. Results of a marketing study by the Lupus Foundation of America. <i>Lupus</i> . 1995 Dec;4(6):450-3.                                                                                                                                                                                                                        |
| 63 | Lim et al., 2014         | 2002      | PP (1 year) (ACR) | United States | Lim SS, Bayakly AR, Helmick CG, Gordon C, Easley KA, Drenkard C. The incidence and prevalence of systemic lupus erythematosus, 2002-2004: The Georgia Lupus Registry. <i>Arthritis Rheumatol</i> . 2014 Feb;66(2):357-68.                                                                                                                                                         |
| 67 | Maskarinec et al., 1995  | 1989      | PP (1 year) (ARA) | United States | Maskarinec G, Katz AR. Prevalence of systemic lupus erythematosus in Hawaii: is there a difference between ethnic groups? <i>Hawaii Med J</i> . 1995 Feb;54(2):406-9.                                                                                                                                                                                                             |
| 71 | Naleway et al., 2005     | 2001      | PT (ACR)          | United States | Naleway AL, Davis ME, Greenlee RT, Wilson DA, McCarty DJ. Epidemiology of systemic lupus erythematosus in rural Wisconsin. <i>Lupus</i> . 2005;14(10):862-6.                                                                                                                                                                                                                      |
| 83 | Somers et al., 2014      | 2002-2004 | PP (1 year) (ACR) | United States | Somers EC, Marder W, Cagnoli P, Lewis EE, DeGuire P, Gordon C, Helmick CG, Wang L, Wing JJ, Dhar JP, Leisen J, Shaltis D, McCune WJ. Population-based incidence and prevalence of systemic lupus erythematosus: the Michigan Lupus                                                                                                                                                |

|    |                                        |           |             |                                                                                                                                                                                                                                                                                                            |
|----|----------------------------------------|-----------|-------------|------------------------------------------------------------------------------------------------------------------------------------------------------------------------------------------------------------------------------------------------------------------------------------------------------------|
|    |                                        |           |             | Epidemiology and Surveillance program. <i>Arthritis Rheumatol.</i> 2014 Feb;66(2):369-78.                                                                                                                                                                                                                  |
| 86 | Valenzuela-Almada et al., 2015<br>2022 |           | PT (ACR)    | United States Valenzuela-Almada MO, Hocaoglu M, Dabit JY, Osei-Onomah SA, Basiaga ML, Orandi AB, Giblon RE, Barbour KE, Crowson CS, Duarte-García A. Epidemiology of Childhood-Onset Systemic Lupus Erythematosus: A Population-Based Study. <i>Arthritis Care Res (Hoboken)</i> . 2022 May;74(5):728-732. |
| 88 | Walsh et al., 2001                     | NR        | LT (ACR)    | United States Walsh BT, Pope C, Reid M, Gall EP, Yocum DE, Clark LC. SLE in a United States-Mexico border community. <i>J Clin Rheumatol.</i> 2001 Feb;7(1):3-9.                                                                                                                                           |
| 89 | Wang et al., 2016                      | 2016      | PP (1 year) | United States Wang Y, Hester LL, Lofland J, Rose S, Karyekar CS, Kern DM, Blacketer M, Davis K, Shields-Tuttle K. Update on prevalence of diagnosed systemic lupus erythematosus (SLE) by major health insurance types in the US in 2016. <i>BMC Res Notes.</i> 2022 Jan 9;15(1):5.                        |
| 90 | Ward et al., 2004                      | 1988-1994 | LT          | United States Ward MM. Prevalence of physician-diagnosed systemic lupus erythematosus in the United States: results from the third national health and nutrition examination survey. <i>J Womens Health (Larchmt)</i> . 2004 Jul-Aug;13(6):713-8.                                                          |
| 93 | Li et al., 2020                        | 2009      | PP (1 year) | United States Li S, Gong T, Peng Y, Nieman KM, Gilbertson DT. Prevalence and incidence of systemic lupus erythematosus and associated outcomes in the 2009-2016 US Medicare population. <i>Lupus.</i> 2020 Jan;29(1):15-26.                                                                                |
| 93 | Li et al., 2020                        | 2010      | PP (1 year) | United States Li S, Gong T, Peng Y, Nieman KM, Gilbertson DT. Prevalence and incidence of systemic lupus erythematosus and associated outcomes in the 2009-2016 US Medicare population. <i>Lupus.</i> 2020 Jan;29(1):15-26.                                                                                |
| 93 | Li et al., 2020                        | 2011      | PP (1 year) | United States Li S, Gong T, Peng Y, Nieman KM, Gilbertson DT. Prevalence and incidence of systemic lupus erythematosus and associated outcomes in the 2009-2016 US Medicare population. <i>Lupus.</i> 2020 Jan;29(1):15-26.                                                                                |
| 93 | Li et al., 2020                        | 2012      | PP (1 year) | United States Li S, Gong T, Peng Y, Nieman KM, Gilbertson DT. Prevalence and incidence of systemic lupus erythematosus and associated outcomes in the 2009-2016 US Medicare population. <i>Lupus.</i> 2020 Jan;29(1):15-26.                                                                                |
| 93 | Li et al., 2020                        | 2013      | PP (1 year) | United States Li S, Gong T, Peng Y, Nieman KM, Gilbertson DT. Prevalence and incidence of systemic lupus erythematosus and associated outcomes in the 2009-2016 US Medicare population. <i>Lupus.</i> 2020 Jan;29(1):15-26.                                                                                |



|     |                       |      |             |               |                                                                                                                                                                                                                                                                                         |
|-----|-----------------------|------|-------------|---------------|-----------------------------------------------------------------------------------------------------------------------------------------------------------------------------------------------------------------------------------------------------------------------------------------|
| 93  | Li et al., 2020       | 2014 | PP (1 year) | United States | Li S, Gong T, Peng Y, Nieman KM, Gilbertson DT. Prevalence and incidence of systemic lupus erythematosus and associated outcomes in the 2009-2016 US Medicare population. <i>Lupus</i> . 2020 Jan;29(1):15-26.                                                                          |
| 93  | Li et al., 2020       | 2015 | PP (1 year) | United States | Li S, Gong T, Peng Y, Nieman KM, Gilbertson DT. Prevalence and incidence of systemic lupus erythematosus and associated outcomes in the 2009-2016 US Medicare population. <i>Lupus</i> . 2020 Jan;29(1):15-26.                                                                          |
| 93  | Li et al., 2020       | 2016 | PP (1 year) | United States | Li S, Gong T, Peng Y, Nieman KM, Gilbertson DT. Prevalence and incidence of systemic lupus erythematosus and associated outcomes in the 2009-2016 US Medicare population. <i>Lupus</i> . 2020 Jan;29(1):15-26.                                                                          |
| 107 | Uramoto et al., 1999  | 1993 | PT (ACR)    | United States | Uramoto KM, Michet CJ Jr, Thumboo J, Sunku J, O'Fallon WM, Gabriel SE. Trends in the incidence and mortality of systemic lupus erythematosus, 1950-1992. <i>Arthritis Rheum</i> . 1999 Jan;42(1):46-50.                                                                                 |
| 35  | Granados et al., 2015 | 2011 | PT (ACR)    | Venezuela     | Granados Y, Cedeño L, Rosillo C, Berbin S, Azocar M, Molina ME, Lara O, Sanchez G, Peláez-Ballestas I. Prevalence of musculoskeletal disorders and rheumatic diseases in an urban community in Monagas State, Venezuela: a COPCORD study. <i>Clin Rheumatol</i> . 2015 May;34(5):871-7. |

Abbreviation: NR, not reported; ACR, The American College of Rheumatology; ARA, The American Rheumatism Association; SLICC, The Systemic Lupus International Collaborating Clinics.

#### Appendix 5 Quality assessment of studies using the AXIS tool

Table S8. Quality assessment of studies using the AXIS tool.

| Study                         | Q1  | Q2  | Q3  | Q4  | Q5  | Q6  | Q7  | Q8  | Q9  | Q10 | Q11 | Q12 | Q13     | Q14 | Q15 | Q16 | Q17 | Q18 | Q19 | Q20     | Overall risk |
|-------------------------------|-----|-----|-----|-----|-----|-----|-----|-----|-----|-----|-----|-----|---------|-----|-----|-----|-----|-----|-----|---------|--------------|
| Al Dhanhani et al., 2017      | Yes | Yes | Yes | Yes | Yes | Yes | N/A | Yes | Yes | Yes | Yes | No  | No      | N/A | Yes | Yes | Yes | Yes | No  | N/A     | Low          |
| Alamanos et al. 2003          | Yes | Yes | Yes | Yes | Yes | Yes | N/A | Yes | Yes | Yes | Yes | Yes | No      | N/A | Yes | Yes | Yes | Yes | No  | N/A     | Low          |
| Al-Arfaj et al., 2002         | Yes | Yes | Yes | Yes | Yes | Yes | No  | Yes | Yes | Yes | Yes | No  | Unclear | No  | Yes | Yes | Yes | Yes | No  | Unclear | Medium       |
| Alonso et al., 2011           | Yes | Yes | Yes | Yes | Yes | Yes | N/A | Yes | Yes | Yes | Yes | Yes | No      | N/A | Yes | Yes | Yes | Yes | No  | N/A     | Low          |
| Alvarez-Nemegyei et al., 2011 | Yes | Yes | No  | Yes | Yes | Yes | No  | Yes | Yes | Yes | Yes | No  | No      | No  | Yes | Yes | Yes | Yes | No  | Yes     | High         |

|                                       |     |     |     |     |     |     |     |     |     |     |     |     |         |     |     |     |     |     |    |         |      |
|---------------------------------------|-----|-----|-----|-----|-----|-----|-----|-----|-----|-----|-----|-----|---------|-----|-----|-----|-----|-----|----|---------|------|
| <b>Anstey et al., 1993</b>            | Yes | Yes | Yes | Yes | Yes | Yes | No  | Yes | Yes | Yes | Yes | Yes | No      | No  | Yes | Yes | Yes | Yes | No | Yes     | Low  |
| <b>Arnaud et al., 2014</b>            | Yes | Yes | Yes | Yes | Yes | Yes | N/A | Yes | Yes | Yes | Yes | No  | No      | N/A | Yes | Yes | Yes | Yes | No | N/A     | Low  |
| <b>Bae et al., 2020</b>               | Yes | Yes | Yes | Yes | Yes | Yes | N/A | Yes | Yes | Yes | Yes | No  | No      | N/A | Yes | Yes | Yes | Yes | No | N/A     | Low  |
| <b>Balluz et al., 2001</b>            | Yes | Yes | Yes | Yes | Yes | Yes | No  | Yes | Yes | Yes | Yes | No  | No      | No  | Yes | Yes | Yes | Yes | No | Yes     | Low  |
| <b>Benucci et al., 2005</b>           | Yes | Yes | Yes | Yes | Yes | Yes | No  | Yes | Yes | Yes | Yes | No  | No      | No  | Yes | Yes | Yes | Yes | No | Yes     | Low  |
| <b>Bernatsky et al., 2007</b>         | Yes | Yes | Yes | Yes | Yes | Yes | N/A | Yes | Yes | Yes | Yes | No  | No      | N/A | Yes | Yes | Yes | Yes | No | N/A     | Low  |
| <b>Bossingham et al., 2003</b>        | Yes | Yes | Yes | Yes | Yes | Yes | N/A | Yes | Yes | Yes | Yes | No  | No      | N/A | Yes | Yes | Yes | Yes | No | N/A     | Low  |
| <b>Brinks et al., 2014</b>            | Yes | Yes | Yes | Yes | Yes | Yes | N/A | Yes | Yes | Yes | Yes | No  | No      | N/A | Yes | Yes | Yes | Yes | No | N/A     | Low  |
| <b>Brinks et al., 2016</b>            | Yes | Yes | Yes | Yes | Yes | Yes | N/A | Yes | Yes | Yes | Yes | No  | No      | N/A | Yes | Yes | Yes | Yes | No | N/A     | Low  |
| <b>Castro-Villarreal et al., 2021</b> | Yes | Yes | Yes | Yes | Yes | Yes | N/A | Yes | Yes | Yes | Yes | No  | No      | N/A | Yes | Yes | Yes | Yes | No | N/A     | Low  |
| <b>Chakravarty et al., 2007</b>       | Yes | Yes | Yes | Yes | Yes | Yes | N/A | Yes | Yes | Yes | Yes | No  | No      | N/A | Yes | Yes | Yes | Yes | No | N/A     | Low  |
| <b>Chiu et al., 2010</b>              | Yes | Yes | Yes | Yes | Yes | Yes | N/A | Yes | Yes | No  | No  | No  | No      | N/A | Yes | Yes | Yes | Yes | No | N/A     | High |
| <b>Chopra et al., 2015</b>            | Yes | Yes | Yes | Yes | Yes | Yes | No  | Yes | Yes | No  | No  | No  | Unclear | No  | Yes | Yes | Yes | Yes | No | Unclear | High |
| <b>Chung et al., 2021</b>             | Yes | Yes | Yes | Yes | Yes | Yes | N/A | Yes | Yes | Yes | Yes | No  | No      | N/A | Yes | Yes | Yes | Yes | No | N/A     | Low  |
| <b>Cortés Verdú et al., 2020</b>      | Yes | Yes | Yes | Yes | Yes | Yes | No  | Yes | Yes | Yes | Yes | Yes | No      | No  | Yes | Yes | Yes | Yes | No | Yes     | Low  |
| <b>Dadoniene et al., 2006</b>         | Yes | Yes | Yes | Yes | Yes | Yes | No  | Yes | Yes | No  | No  | No  | No      | No  | Yes | Yes | Yes | Yes | No | Yes     | High |
| <b>Dai et al., 2003</b>               | Yes | Yes | No  | Yes | Yes | Yes | No  | Yes | Yes | Yes | Yes | No  | No      | No  | Yes | Yes | Yes | Yes | No | Yes     | High |
| <b>Dall'Era et al., 2017</b>          | Yes | Yes | Yes | Yes | Yes | Yes | N/A | Yes | Yes | Yes | Yes | No  | No      | N/A | Yes | Yes | Yes | Yes | No | N/A     | Low  |
| <b>Davatchi et al., 2009</b>          | Yes | Yes | Yes | Yes | Yes | Yes | N/A | Yes | Yes | Yes | Yes | No  | No      | N/A | Yes | Yes | Yes | Yes | No | N/A     | Low  |
| <b>Davatchi et al., 2009</b>          | Yes | Yes | Yes | Yes | Yes | Yes | No  | Yes | Yes | Yes | Yes | Yes | No      | No  | Yes | Yes | Yes | Yes | No | Yes     | Low  |
| <b>Davatchi et al., 2016</b>          | Yes | Yes | Yes | Yes | Yes | Yes | No  | Yes | Yes | Yes | Yes | Yes | No      | No  | Yes | Yes | Yes | Yes | No | Yes     | Low  |
| <b>Del Río Nájera et al., 2016</b>    | Yes | Yes | Yes | Yes | Yes | Yes | No  | Yes | Yes | Yes | Yes | Yes | No      | No  | Yes | Yes | Yes | Yes | No | Yes     | Low  |
| <b>Deligny et al., 2002</b>           | Yes | Yes | Yes | Yes | Yes | Yes | N/A | Yes | Yes | Yes | Yes | No  | No      | N/A | Yes | Yes | Yes | Yes | No | N/A     | Low  |
| <b>Elfvig et al., 2014</b>            | Yes | Yes | Yes | Yes | Yes | Yes | N/A | Yes | Yes | Yes | Yes | No  | No      | N/A | Yes | Yes | Yes | Yes | No | N/A     | Low  |
| <b>Fatoye et al., 2018</b>            | Yes | Yes | Yes | Yes | Yes | Yes | N/A | Yes | Yes | Yes | Yes | No  | No      | N/A | Yes | Yes | Yes | Yes | No | N/A     | Low  |
| <b>Feldman et al., 2013</b>           | Yes | Yes | Yes | Yes | Yes | Yes | N/A | Yes | Yes | Yes | Yes | No  | No      | N/A | Yes | Yes | Yes | Yes | No | N/A     | Low  |
| <b>Fernández-Ávila et al., 2019</b>   | Yes | Yes | Yes | Yes | Yes | Yes | N/A | Yes | Yes | No  | No  | No  | No      | N/A | Yes | Yes | Yes | Yes | No | N/A     | High |
| <b>Ferucci et al., 2014</b>           | Yes | Yes | Yes | Yes | Yes | Yes | N/A | Yes | Yes | Yes | Yes | No  | No      | N/A | Yes | Yes | Yes | Yes | No | N/A     | Low  |

|                                          |     |     |     |     |     |     |     |     |     |     |     |     |         |     |     |     |     |     |    |         |        |
|------------------------------------------|-----|-----|-----|-----|-----|-----|-----|-----|-----|-----|-----|-----|---------|-----|-----|-----|-----|-----|----|---------|--------|
| <b>Flower et al., 2012</b>               | Yes | Yes | Yes | Yes | Yes | Yes | No  | Yes | Yes | Yes | Yes | No  | Unclear | No  | Yes | Yes | Yes | Yes | No | Yes     | Medium |
| <b>Francy-Milena Cuervo et al., 2020</b> | Yes | Yes | No  | Yes | Yes | Yes | No  | Yes | Yes | Yes | Yes | Yes | Unclear | No  | Yes | Yes | Yes | Yes | No | Yes     | High   |
| <b>Furst et al., 2013</b>                | Yes | Yes | Yes | Yes | Yes | Yes | N/A | Yes | Yes | Yes | Yes | No  | No      | N/A | Yes | Yes | Yes | Yes | No | N/A     | Low    |
| <b>Gergianaki et al., 2017</b>           | Yes | Yes | Yes | Yes | Yes | Yes | N/A | Yes | Yes | Yes | Yes | No  | No      | N/A | Yes | Yes | Yes | Yes | No | N/A     | Low    |
| <b>Gonzalez Lucero et al., 2020</b>      | Yes | Yes | Yes | Yes | Yes | Yes | N/A | Yes | Yes | Yes | Yes | No  | No      | N/A | Yes | Yes | Yes | Yes | No | N/A     | Low    |
| <b>Gourley et al., 1997</b>              | Yes | Yes | Yes | Yes | Yes | Yes | No  | Yes | Yes | Yes | Yes | No  | Unclear | No  | Yes | Yes | Yes | Yes | No | Unclear | Medium |
| <b>Govoni et al., 2006</b>               | Yes | Yes | Yes | Yes | Yes | Yes | N/A | Yes | Yes | Yes | Yes | No  | No      | N/A | Yes | Yes | Yes | Yes | No | N/A     | Low    |
| <b>Granados et al., 2015</b>             | Yes | Yes | Yes | Yes | Yes | Yes | No  | Yes | Yes | Yes | Yes | Yes | No      | No  | Yes | Yes | Yes | Yes | No | Yes     | Low    |
| <b>Guevara-Pacheco et al., 2016</b>      | Yes | Yes | Yes | Yes | Yes | Yes | No  | Yes | Yes | Yes | Yes | Yes | No      | No  | Yes | Yes | Yes | Yes | No | Yes     | Low    |
| <b>Hermansen et al., 2016</b>            | Yes | Yes | Yes | Yes | Yes | Yes | N/A | Yes | Yes | Yes | Yes | Yes | No      | N/A | Yes | Yes | Yes | Yes | No | N/A     | Low    |
| <b>Hiraki et al., 2012</b>               | Yes | Yes | Yes | Yes | Yes | Yes | N/A | Yes | Yes | Yes | Yes | No  | No      | N/A | Yes | Yes | Yes | Yes | No | N/A     | Low    |
| <b>Hochberg et al., 1995</b>             | Yes | Yes | No  | Yes | Yes | Yes | No  | Yes | Yes | Yes | Yes | No  | Unclear | No  | Yes | Yes | Yes | Yes | No | Yes     | High   |
| <b>Hopkinson et al., 1993</b>            | Yes | Yes | Yes | Yes | Yes | Yes | N/A | Yes | Yes | No  | No  | No  | No      | N/A | Yes | Yes | Yes | Yes | No | N/A     | High   |
| <b>Housey et al., 2015</b>               | Yes | Yes | Yes | Yes | Yes | Yes | N/A | Yes | Yes | Yes | Yes | No  | No      | N/A | Yes | Yes | Yes | Yes | No | N/A     | Low    |
| <b>Ingvarsson et al., 2016</b>           | Yes | Yes | Yes | Yes | Yes | Yes | N/A | Yes | Yes | Yes | Yes | No  | No      | N/A | Yes | Yes | Yes | Yes | No | N/A     | Low    |
| <b>Iseki et al., 1994</b>                | Yes | Yes | Yes | Yes | Yes | Yes | N/A | Yes | Yes | Yes | Yes | No  | No      | N/A | Yes | Yes | Yes | Yes | No | N/A     | Low    |
| <b>Izmirly et al., 2017</b>              | Yes | Yes | Yes | Yes | Yes | Yes | N/A | Yes | Yes | Yes | Yes | No  | No      | N/A | Yes | Yes | Yes | Yes | No | N/A     | Low    |
| <b>Jarukitsopa et al., 2015</b>          | Yes | Yes | Yes | Yes | Yes | Yes | N/A | Yes | Yes | Yes | Yes | No  | No      | N/A | Yes | Yes | Yes | Yes | No | N/A     | Low    |
| <b>Johnson et al., 1995</b>              | Yes | Yes | Yes | Yes | Yes | Yes | No  | Yes | Yes | Yes | Yes | No  | No      | No  | Yes | Yes | Yes | Yes | No | Yes     | Low    |
| <b>Ju et al., 2014</b>                   | Yes | Yes | Yes | Yes | Yes | Yes | N/A | Yes | Yes | Yes | Yes | No  | No      | N/A | Yes | Yes | Yes | Yes | No | N/A     | Low    |
| <b>Kedves et al., 2020</b>               | Yes | Yes | Yes | Yes | Yes | Yes | N/A | Yes | Yes | Yes | Yes | No  | No      | N/A | Yes | Yes | Yes | Yes | No | N/A     | Low    |
| <b>Kwak et al., 2021</b>                 | Yes | Yes | Yes | Yes | Yes | Yes | N/A | Yes | Yes | Yes | Yes | No  | No      | N/A | Yes | Yes | Yes | Yes | No | N/A     | Low    |
| <b>Lahita et al., 1995</b>               | Yes | Yes | No  | Yes | Yes | Yes | No  | Yes | Yes | No  | No  | No  | Unclear | No  | Yes | Yes | Yes | Yes | No | Unclear | High   |
| <b>Lastrup et al., 2009</b>              | Yes | Yes | Yes | Yes | Yes | Yes | No  | Yes | Yes | Yes | Yes | No  | No      | No  | Yes | Yes | Yes | Yes | No | Yes     | Low    |
| <b>Leong et al., 2021</b>                | Yes | Yes | Yes | Yes | Yes | Yes | N/A | Yes | Yes | Yes | Yes | No  | No      | N/A | Yes | Yes | Yes | Yes | No | N/A     | Low    |
| <b>Lerang et al., 2012</b>               | Yes | Yes | Yes | Yes | Yes | Yes | N/A | Yes | Yes | Yes | Yes | Yes | No      | N/A | Yes | Yes | Yes | Yes | No | N/A     | Low    |
| <b>Li et al., 2020</b>                   | Yes | Yes | Yes | Yes | Yes | Yes | N/A | Yes | Yes | Yes | Yes | Yes | No      | N/A | Yes | Yes | Yes | Yes | No | N/A     | Low    |

|                                      |     |     |     |     |     |     |     |     |     |     |     |     |         |     |     |     |     |     |    |     |        |
|--------------------------------------|-----|-----|-----|-----|-----|-----|-----|-----|-----|-----|-----|-----|---------|-----|-----|-----|-----|-----|----|-----|--------|
| <b>Lim et al., 2014</b>              | Yes | Yes | Yes | Yes | Yes | Yes | N/A | Yes | Yes | Yes | Yes | No  | No      | N/A | Yes | Yes | Yes | Yes | No | N/A | Low    |
| <b>Llerena et al., 2000</b>          | Yes | Yes | No  | Yes | Yes | Yes | No  | Yes | Yes | Yes | Yes | No  | Unclear | No  | Yes | Yes | Yes | Yes | No | Yes | High   |
| <b>Londoño et al., 2018</b>          | Yes | Yes | No  | Yes | Yes | Yes | No  | Yes | Yes | Yes | Yes | No  | Unclear | No  | Yes | Yes | Yes | Yes | No | Yes | High   |
| <b>López et al., 2003</b>            | Yes | Yes | Yes | Yes | Yes | Yes | N/A | Yes | Yes | Yes | Yes | No  | No      | N/A | Yes | Yes | Yes | Yes | No | N/A | Low    |
| <b>Lythgoe et al., 2022</b>          | Yes | Yes | Yes | Yes | Yes | Yes | N/A | Yes | Yes | Yes | Yes | No  | No      | N/A | Yes | Yes | Yes | Yes | No | N/A | Low    |
| <b>Mackie et al., 2015</b>           | Yes | Yes | Yes | Yes | Yes | Yes | No  | Yes | Yes | Yes | Yes | No  | No      | No  | Yes | Yes | Yes | Yes | No | N/A | Low    |
| <b>Magro et al., 2018</b>            | Yes | Yes | Yes | Yes | Yes | Yes | No  | Yes | Yes | Yes | Yes | No  | No      | Yes | Yes | Yes | Yes | Yes | No | Yes | Low    |
| <b>Malaviya et al., 1993</b>         | Yes | Yes | Yes | Yes | Yes | Yes | No  | Yes | Yes | Yes | Yes | Yes | Unclear | No  | Yes | Yes | Yes | Yes | No | Yes | Medium |
| <b>Maskarinec et al., 1995</b>       | Yes | Yes | Yes | Yes | Yes | Yes | No  | Yes | Yes | Yes | Yes | No  | Unclear | No  | Yes | Yes | Yes | Yes | No | Yes | Medium |
| <b>McCarty et al., 1995</b>          | Yes | Yes | Yes | Yes | Yes | Yes | N/A | Yes | Yes | Yes | Yes | No  | No      | N/A | Yes | Yes | Yes | Yes | No | N/A | Low    |
| <b>Moghimi et al., 2015</b>          | Yes | Yes | No  | Yes | Yes | Yes | No  | Yes | Yes | Yes | Yes | No  | Unclear | No  | Yes | Yes | Yes | Yes | No | Yes | High   |
| <b>Mok et al., 2008</b>              | Yes | Yes | Yes | Yes | Yes | Yes | N/A | Yes | Yes | Yes | Yes | Yes | No      | N/A | Yes | Yes | Yes | Yes | No | N/A | Low    |
| <b>Molina et al., 2007</b>           | Yes | Yes | Yes | Yes | Yes | Yes | N/A | Yes | Yes | Yes | Yes | No  | No      | N/A | Yes | Yes | Yes | Yes | No | N/A | Low    |
| <b>Molokhia et al., 2001</b>         | Yes | Yes | Yes | Yes | Yes | Yes | N/A | Yes | Yes | No  | No  | No  | No      | N/A | Yes | Yes | Yes | Yes | No | N/A | High   |
| <b>Naleway et al., 2005</b>          | Yes | Yes | Yes | Yes | Yes | Yes | N/A | Yes | Yes | Yes | Yes | No  | No      | N/A | Yes | Yes | Yes | Yes | No | N/A | Low    |
| <b>Nasonov et al., 2014</b>          | Yes | Yes | Yes | Yes | Yes | Yes | N/A | Yes | Yes | Yes | Yes | No  | No      | N/A | Yes | Yes | Yes | Yes | No | N/A | Low    |
| <b>Ng et al., 2013</b>               | Yes | Yes | Yes | Yes | Yes | Yes | N/A | Yes | Yes | No  | No  | No  | No      | N/A | Yes | Yes | Yes | Yes | No | N/A | High   |
| <b>Nightingale et al., 2006</b>      | Yes | Yes | Yes | Yes | Yes | Yes | N/A | Yes | Yes | No  | No  | Yes | No      | N/A | Yes | Yes | Yes | Yes | No | N/A | High   |
| <b>Nossent et al., 1992</b>          | Yes | Yes | Yes | Yes | Yes | Yes | N/A | Yes | Yes | Yes | Yes | No  | No      | N/A | Yes | Yes | Yes | Yes | No | N/A | Low    |
| <b>Nossent et al., 2001</b>          | Yes | Yes | Yes | Yes | Yes | Yes | N/A | Yes | Yes | Yes | Yes | No  | No      | N/A | Yes | Yes | Yes | Yes | No | N/A | Low    |
| <b>Otsa et al., 2017</b>             | Yes | Yes | Yes | Yes | Yes | Yes | N/A | Yes | Yes | Yes | Yes | No  | No      | N/A | Yes | Yes | Yes | Yes | No | N/A | Low    |
| <b>Pamuk et al., 2016</b>            | Yes | Yes | Yes | Yes | Yes | Yes | N/A | Yes | Yes | Yes | Yes | No  | No      | N/A | Yes | Yes | Yes | Yes | No | N/A | Low    |
| <b>Peláez-Ballestas et al., 2011</b> | Yes | Yes | Yes | Yes | Yes | Yes | No  | Yes | Yes | Yes | Yes | Yes | No      | No  | Yes | Yes | Yes | Yes | No | Yes | Low    |
| <b>Peschken et al., 2000</b>         | Yes | Yes | Yes | Yes | Yes | Yes | N/A | Yes | Yes | Yes | Yes | No  | No      | N/A | Yes | Yes | Yes | Yes | No | N/A | Low    |
| <b>Quintana et al., 2016</b>         | Yes | Yes | No  | Yes | Yes | Yes | No  | Yes | Yes | Yes | Yes | Yes | Unclear | No  | Yes | Yes | Yes | Yes | No | Yes | High   |
| <b>Rees et al., 2016</b>             | Yes | Yes | Yes | Yes | Yes | Yes | N/A | Yes | Yes | Yes | Yes | No  | No      | N/A | Yes | Yes | Yes | Yes | No | N/A | Low    |
| <b>Reyes-Llerena et al., 2009</b>    | Yes | Yes | No  | Yes | Yes | Yes | No  | Yes | Yes | Yes | Yes | Yes | No      | No  | Yes | Yes | Yes | Yes | No | Yes | High   |
| <b>Samanta et al., 1992</b>          | Yes | Yes | Yes | Yes | Yes | Yes | No  | Yes | Yes | No  | No  | No  | Unclear | No  | Yes | Yes | Yes | Yes | No | Yes | High   |

|                                |     |     |     |     |     |     |     |     |     |     |     |     |         |     |     |     |     |     |    |     |      |
|--------------------------------|-----|-----|-----|-----|-----|-----|-----|-----|-----|-----|-----|-----|---------|-----|-----|-----|-----|-----|----|-----|------|
| Sandoughi et al., 2013         | Yes | Yes | No  | Yes | Yes | Yes | No  | Yes | Yes | Yes | Yes | No  | Unclear | No  | Yes | Yes | Yes | Yes | No | Yes | High |
| Schwarting et al., 2021        | Yes | Yes | Yes | Yes | Yes | Yes | N/A | Yes | Yes | Yes | Yes | Yes | No      | N/A | Yes | Yes | Yes | Yes | No | N/A | Low  |
| Scolnik et al., 2014           | Yes | Yes | Yes | Yes | Yes | Yes | N/A | Yes | Yes | Yes | Yes | No  | No      | N/A | Yes | Yes | Yes | Yes | No | N/A | Low  |
| Segasothy et al., 2001         | Yes | Yes | Yes | Yes | Yes | Yes | N/A | Yes | Yes | Yes | Yes | No  | No      | N/A | Yes | Yes | Yes | Yes | No | N/A | Low  |
| Senna et al., 2004             | Yes | Yes | No  | Yes | Yes | Yes | No  | Yes | Yes | Yes | Yes | Yes | Unclear | No  | Yes | Yes | Yes | Yes | No | Yes | High |
| Shim et al., 2014              | Yes | Yes | Yes | Yes | Yes | Yes | N/A | Yes | Yes | Yes | Yes | No  | No      | N/A | Yes | Yes | Yes | Yes | No | N/A | Low  |
| Simard et al., 2014            | Yes | Yes | Yes | Yes | Yes | Yes | N/A | Yes | Yes | Yes | Yes | Yes | No      | N/A | Yes | Yes | Yes | Yes | No | N/A | Low  |
| Śliwczyński et al., 2015       | Yes | Yes | Yes | Yes | Yes | Yes | N/A | Yes | Yes | Yes | Yes | No  | No      | N/A | Yes | Yes | Yes | Yes | No | N/A | Low  |
| Somers et al., 2007            | Yes | Yes | Yes | Yes | Yes | Yes | N/A | Yes | Yes | Yes | Yes | No  | No      | N/A | Yes | Yes | Yes | Yes | No | N/A | Low  |
| Somers et al., 2014            | Yes | Yes | Yes | Yes | Yes | Yes | N/A | Yes | Yes | Yes | Yes | No  | No      | N/A | Yes | Yes | Yes | Yes | No | N/A | Low  |
| Ståhl-Hallengren et al., 2000  | Yes | Yes | Yes | Yes | Yes | Yes | N/A | Yes | Yes | Yes | Yes | No  | No      | N/A | Yes | Yes | Yes | Yes | No | N/A | Low  |
| Tsioni et al., 2015            | Yes | Yes | Yes | Yes | Yes | Yes | N/A | Yes | Yes | Yes | Yes | Yes | No      | N/A | Yes | Yes | Yes | Yes | No | N/A | Low  |
| Ungrasert et al., 2017         | Yes | Yes | Yes | Yes | Yes | Yes | N/A | Yes | Yes | Yes | Yes | Yes | No      | N/A | Yes | Yes | Yes | Yes | No | N/A | Low  |
| Uramoto et al., 1999           | Yes | Yes | Yes | Yes | Yes | Yes | N/A | Yes | Yes | Yes | Yes | No  | No      | N/A | Yes | Yes | Yes | Yes | No | N/A | Low  |
| Valenzuela-Almada et al., 2022 | Yes | Yes | Yes | Yes | Yes | Yes | N/A | Yes | Yes | Yes | Yes | No  | No      | N/A | Yes | Yes | Yes | Yes | No | N/A | Low  |
| Vilar et al., 2002             | Yes | Yes | Yes | Yes | Yes | Yes | N/A | Yes | Yes | Yes | Yes | No  | No      | N/A | Yes | Yes | Yes | Yes | No | N/A | Low  |
| Voss et al., 1998              | Yes | Yes | Yes | Yes | Yes | Yes | N/A | Yes | Yes | Yes | Yes | No  | No      | N/A | Yes | Yes | Yes | Yes | No | N/A | Low  |
| Walsh et al., 2001             | Yes | Yes | Yes | Yes | Yes | Yes | N/A | Yes | Yes | Yes | Yes | No  | No      | N/A | Yes | Yes | Yes | Yes | No | N/A | Low  |
| Wang et al., 2016              | Yes | Yes | Yes | Yes | Yes | Yes | N/A | Yes | Yes | Yes | Yes | No  | No      | N/A | Yes | Yes | Yes | Yes | No | N/A | Low  |
| Ward et al., 2004              | Yes | Yes | Yes | Yes | Yes | Yes | N/A | Yes | Yes | Yes | Yes | No  | No      | N/A | Yes | Yes | Yes | Yes | No | N/A | Low  |
| Wigley et al., 1994            | Yes | Yes | No  | Yes | Yes | Yes | No  | Yes | Yes | Yes | Yes | Yes | No      | No  | Yes | Yes | Yes | Yes | No | Yes | High |
| Yeh et al., 2013               | Yes | Yes | Yes | Yes | Yes | Yes | N/A | Yes | Yes | Yes | Yes | No  | No      | N/A | Yes | Yes | Yes | Yes | No | N/A | Low  |
| Zeng et al., 1994              | Yes | Yes | No  | Yes | Yes | Yes | N/A | Yes | Yes | Yes | No  | Yes | No      | N/A | Yes | Yes | Yes | No  | No | Yes | High |
| Zou et al., 2014               | Yes | Yes | Yes | Yes | Yes | Yes | No  | Yes | Yes | Yes | Yes | No  | No      | No  | Yes | Yes | Yes | Yes | No | Yes | Low  |

**AXIS: Appraisal tool of Cross-Sectional Studies:**

Q1) Were the aims/objectives of the study clear?

Q2) Was the study design appropriate for the stated aim(s)?

- Q3) Was the sample size justified?
- Q4) Was the target/reference population clearly defined? (Is it clear who the research was about?)
- Q5) Was the sample frame taken from an appropriate population base so that it closely represented the target/reference population under investigation?
- Q6) Was the selection process likely to select subjects/participants that were representative of the target/reference population under investigation?
- Q7) Were measures undertaken to address and categorise non-responders?
- Q8) Were the risk factor and outcome variables measured appropriate to the aims of the study?
- Q9) Were the risk factor and outcome variables measured correctly using instruments/measurements that had been trialled, piloted or published previously?
- Q10) Is it clear what was used to determined statistical significance and/or precision estimates? (eg, p values, CIs)
- Q11) Were the methods (including statistical methods) sufficiently described to enable them to be repeated?
- Q12) Were the basic data adequately described?
- Q13) Does the response rate raise concerns about non-response bias?
- Q14) If appropriate, was information about non-responders described?
- Q15) Were the results internally consistent?
- Q16) Were the results for the analyses described in the methods, presented?
- Q17) Were the authors' discussions and conclusions justified by the results?
- Q18) Were the limitations of the study discussed?
- Q19) Were there any funding sources or conflicts of interest that may affect the authors' interpretation of the results?
- Q20) Was ethical approval or consent of participants attained?

**Appendix 6 Countries and territories in analysis regions**

**Table S9. Countries and territories in analysis regions. The table gives the full details of the geographical groups and hierarchy used in the statistical model. The classification is the same as the one used by the Global Burden of Disease and by the United Nations. The hierarchy mainly follows geography and income.**

| Region                                                  | Countries                                                                                                                                                                                                                                                                     |
|---------------------------------------------------------|-------------------------------------------------------------------------------------------------------------------------------------------------------------------------------------------------------------------------------------------------------------------------------|
| <b>Central Europe, eastern Europe, and central Asia</b> |                                                                                                                                                                                                                                                                               |
| Asia, central                                           | Armenia, Azerbaijan, Georgia, Kazakhstan, Kyrgyzstan, Mongolia, Tajikistan, Turkmenistan, Uzbekistan                                                                                                                                                                          |
| Europe, central                                         | Albania, Bosnia and Herzegovina, Bulgaria, Croatia, Czech Republic, Hungary, Montenegro, Poland, Romania, Serbia, Slovakia, Slovenia, TFYR Macedonia                                                                                                                          |
| Europe, eastern                                         | Belarus, Estonia, Latvia, Lithuania, Moldova, Russia, Ukraine                                                                                                                                                                                                                 |
| <b>High income</b>                                      |                                                                                                                                                                                                                                                                               |
| Asia Pacific, high income                               | Brunei Darussalam, Japan, Republic of Korea, Singapore                                                                                                                                                                                                                        |
| Australasia                                             | Australia, New Zealand                                                                                                                                                                                                                                                        |
| Europe, western                                         | Austria, Belgium, Cyprus, Denmark, Finland, France, Germany, Greece, Iceland, Ireland, Israel, Italy, Luxembourg, Malta, Netherlands, Norway, Portugal, Spain, Sweden, Switzerland, United Kingdom                                                                            |
| Latin America, southern                                 | Argentina, Chile, Uruguay                                                                                                                                                                                                                                                     |
| North America, high income                              | Canada, United States of America                                                                                                                                                                                                                                              |
| <b>Latin America and Caribbean</b>                      |                                                                                                                                                                                                                                                                               |
| Caribbean                                               | Antigua and Barbuda, Bahamas, Barbados, Belize, Cuba, Dominican Republic, Grenada, Guyana, Haiti, Jamaica, Puerto Rico, Saint Lucia, Saint Vincent and the Grenadines, Suriname, Trinidad and Tobago, Virgin Island (US)                                                      |
| Latin America, Andean                                   | Bolivia, Ecuador, Peru                                                                                                                                                                                                                                                        |
| Latin America, central                                  | Colombia, Costa Rica, El Salvador, Guatemala, Honduras, Mexico, Nicaragua, Panama, Venezuela (Bolivarian Republic of)                                                                                                                                                         |
| Latin America, tropical                                 | Brazil, Paraguay                                                                                                                                                                                                                                                              |
| <b>North Africa and Middle East</b>                     |                                                                                                                                                                                                                                                                               |
| North Africa and the Middle East                        | Afghanistan, Algeria, Bahrain, Egypt, Iran (Islamic Republic of), Iraq, Jordan, Kuwait, Lebanon, Libyan Arab Jamahiriya, Morocco, Occupied Palestinian Territory, Oman, Qatar, Saudi Arabia, Sudan, Syrian Arab Republic, Sudan, Tunisia, Turkey, United Arab Emirates, Yemen |
| <b>South Asia</b>                                       |                                                                                                                                                                                                                                                                               |
| Asia, south                                             | Bangladesh, Bhutan, India, Nepal, Pakistan                                                                                                                                                                                                                                    |
| <b>South East Asia, east Asia, and Oceania</b>          |                                                                                                                                                                                                                                                                               |

|                              |                                                                                                                                                                                                     |
|------------------------------|-----------------------------------------------------------------------------------------------------------------------------------------------------------------------------------------------------|
| Asia, east                   | China, Dem. People's Republic of Korea                                                                                                                                                              |
| Asia, South East             | Cambodia, Indonesia, Lao People's Democratic Republic, Malaysia, Maldives, Mauritius, Myanmar, Philippines, Seychelles, Sri Lanka, Thailand, Timor-Leste, Vietnam                                   |
| Oceania                      | Fiji, Guam, Kiribati, Marshall Islands, Micronesia (Fed. States of), Papua New Guinea, Samoa, Solomon Islands, Tonga, Vanuatu                                                                       |
| <b>Sub-Saharan Africa</b>    |                                                                                                                                                                                                     |
| Sub-Saharan Africa, central  | Angola, Central African Republic, Congo, Democratic Republic of the Congo, Equatorial Guinea, Gabon                                                                                                 |
| Sub-Saharan Africa, eastern  | Burundi, Comoros, Djibouti, Eritrea, Ethiopia, Kenya, Madagascar, Malawi, Mozambique, Rwanda, Somalia, South Sudan, Uganda, United Republic of Tanzania, Zambia                                     |
| Sub-Saharan Africa, southern | Botswana, Lesotho, Namibia, South Africa, Swaziland, Zimbabwe                                                                                                                                       |
| Sub-Saharan Africa, western  | Benin, Burkina Faso, Côte d'Ivoire, Cameroon, Cape Verde, Chad, Gambia, Ghana, Guinea, Guinea-Bissau, Liberia, Mali, Mauritania, Niger, Nigeria, São Tomé and Príncipe, Senegal, Sierra Leone, Togo |

**References:**

1. United Nations, Department of Economic and Social Affairs, Population Division. World population prospects: the 2017 revision. Vol II. Demographic Profiles, 2017.
2. Parisi R, Iskandar IYK, Kontopantelis E, Augustin M, Griffiths CEM, Ashcroft DM; Global Psoriasis Atlas. National, regional, and worldwide epidemiology of psoriasis: systematic analysis and modelling study. *BMJ*. 2020 May 28;369:m1590.



## Appendix 7 Statistical methods for incidence and prevalence calculation

The prevalence of SLE in different region levels was fitted by a Bayesian hierarchical linear mixed model. In hierarchical model, the prevalence of SLE in one region were estimated based on study data both from the same region and from other regions.

The model applied binomial family, and log-transformation was used to transform prevalence to a linear response variable. To divide countries into several hierarchies, we map all countries to regions/super-regions by the Global Burden of Disease (GBD) classification. In this study, this classification arranged 39 countries into 15 regions which nested in 6 super-regions hierarchically (Table S9).

The statistical was implemented by brms package in R (version 4.0.5). This package is based on Stan and could estimate posterior distribution by Hamiltonian Markov Chain Monte Carlo method. Four chains were used, and the iteration number was set as 4000. Besides region, we have set another three predictor variables with fixed effects. The four fixed variables are age strata, type of prevalence, sex and reporting method (Incidence model does not include type of prevalence and reporting method). Additionally, the model used a student\_t(3, 0, 2.5) prior for the intercept. We reported the prevalence estimate with 95% uncertainty intervals. United Nation population structure provide the size of population in different age strata, it was used to estimate the SLE population in different countries/regions/super-regions. Finally, we also assessed the models in total, the fit of each model was assessed by effective sample size, and trace plots. Please contact Dingyao Zhang for the code of model estimation.

For prevalence model:

```
model <- brm(count | trials(allcount) ~ 1 + (1 | superregion/region/country) + (1 | diagnosis) + (1 | typeofrate) + (1 | ages) + (1 | sex), data =  
datause, family = binomial, thin = 10, chains = 4, iter = 4000, cores = 4, control = list(adapt_delta = 0.995, max_treedepth=20))
```

For incidence model:

```
model <- brm(count | trials(allcount) ~ 1 + (1 | superregion/region/country) + (1 | ages) + (1 | sex), data = datause, family = binomial, thin = 10, chains = 4, iter = 4000, cores = 4, control = list(adapt_delta = 0.995, max_treedepth=20))
```

**Appendix 8 Trace plots for covariates in the Bayesian multilevel model****Figure S2. Trace plots for covariates in the Bayesian multilevel model showing 1000 posterior draws total across 5 parallel chains.**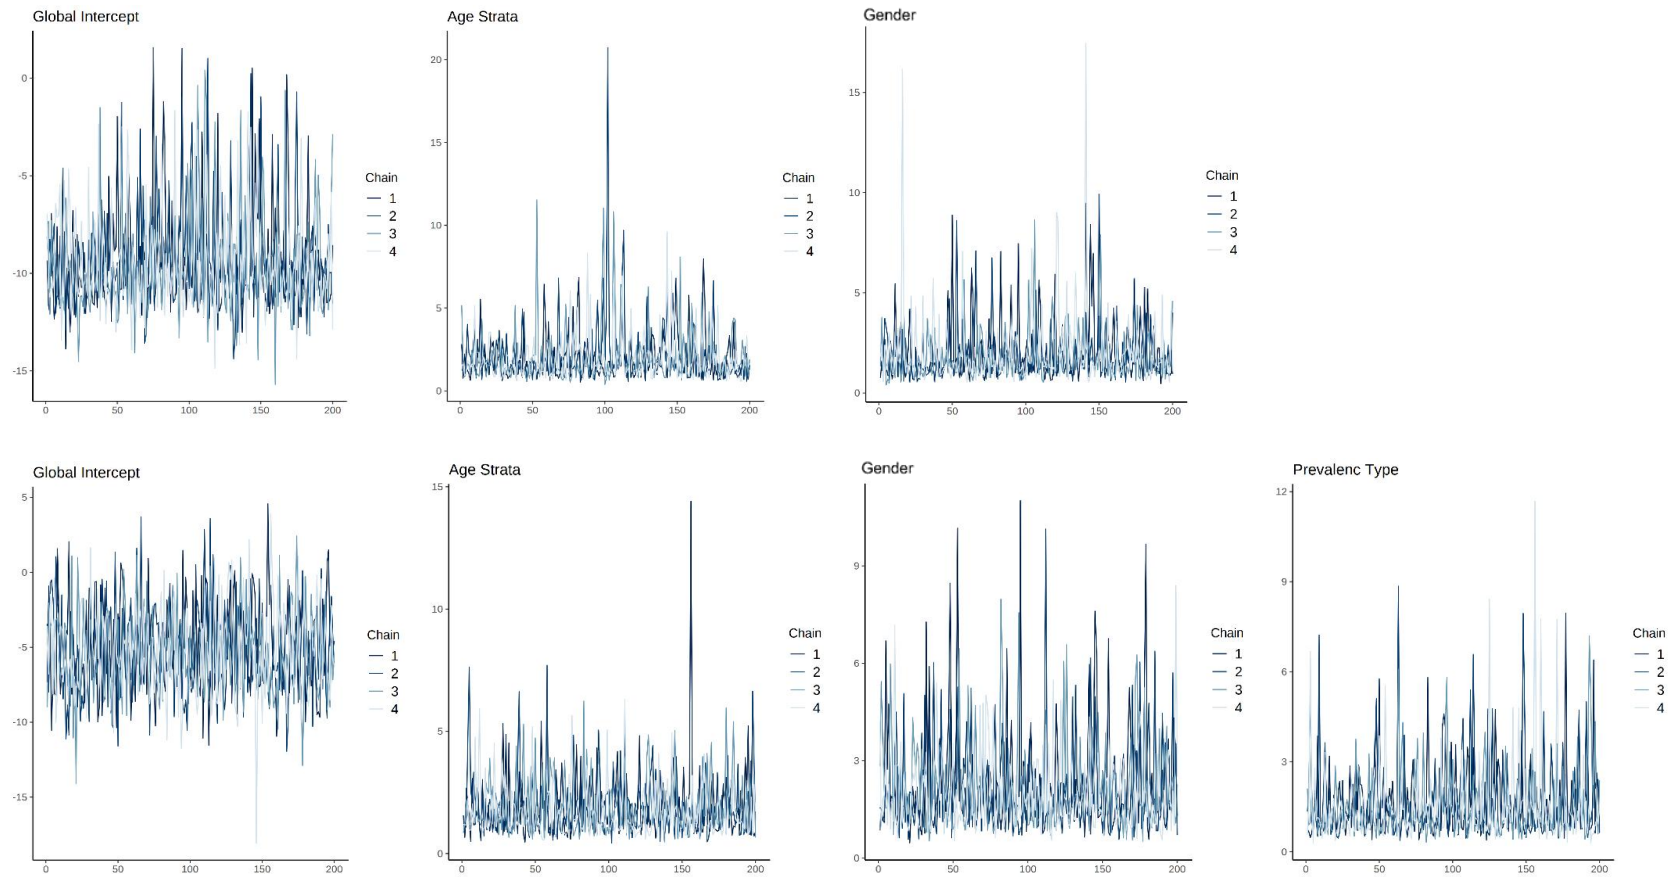

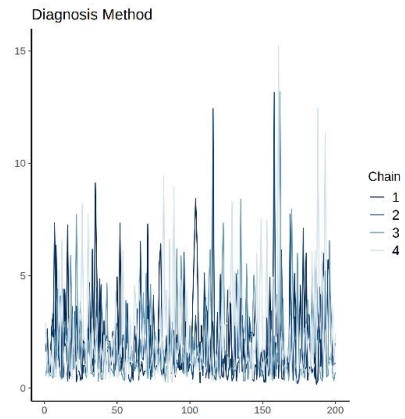

Note: Global intercept is for fixed effect; age strata is the category for age strata for the overall population, children, and adults; diagnosis method is the variable type of diagnostic method; prevalence type is the variable type of prevalence measure; sex is the category for all, male, and female.

### Appendix 9 Subgroup analysis of classification criteria and diagnostic method

We first compared model data with data from countries that have conducted multiple epidemiological studies. We conducted meta-analyses to integrate epidemiologic data within the same country. Because meta-analyses can only analyze less heterogenetic data, the period prevalence with the largest amount of data should be the best choice for the validation, and epidemiologic data obtained from only adult and children population was excluded to avoid potential bias. The United States, China, and the Republic of Korea all had more than 5 available data for the analysis. Detailed results have been listed in Table S10. Data generated by our model fitted well in the period prevalence range. As for meta-analysis, loosely data distribution could lead to high heterogeneity and may alter results to deviate from the true value. Overall, the Republic of Korea yielded similar results to our model, while the meta-analysis results of the United States and China were higher than estimations generated by our model. Since the Bayesian model considers more information (like age strata and studies using other diagnosis method in those countries) than meta-analysis, this comparison strongly supported the accuracy of our model. Notably, since the prevalence of adults was much higher than that of children and most studies investigating the overall population (different age strata combined) focus only on adolescents and adults, the uneven age distribution made meta-analysis less representative. Our model normalizes the data to the natural age strata and therefore includes more children population, which may result in lower prevalence. Considering the constraints of age strata, the results generated by our model are not significantly different from those of the meta-analysis.

**Table S10. Period prevalence for countries with more than 5 available data using different analytical methods.**

| Country                  | Period prevalence (1 year) | Period prevalence (1 year)<br>(95% confidence intervals) |                     |
|--------------------------|----------------------------|----------------------------------------------------------|---------------------|
|                          |                            | Range                                                    | Our Bayesian model  |
| <b>The United States</b> | 9.7-241.9                  | 71.42 (48.47-105.22)                                     | 53.9 (53.17-54.6)   |
| <b>China</b>             | 1.8-81.1                   | 57.79 (52.93-63.10)                                      | 47.53 (47.15-47.96) |
| <b>Republic of Korea</b> | 6.9-79.5                   | 26.28 (24.35-28.36)                                      | 26.29 (26.13-26.47) |

\*All prevalence data were normalized to rate per 100,000 persons.

Then we validated the model by comparing predicated number to actual number



acceptable since even two studies conducted under the same conditions in the same country could hold differences. Additionally, at the country level, our model can still well balance various studies and obtain relatively reasonable predictions of SLE patients, which shows that the prevalence model fits well and can accurately integrate loose data to calculate prevalence rates across countries. Overall, two different validation methods demonstrate the strength of our model. Based on these results, we believe that the model estimation is accurate, reliable and can represent the real-world situation.

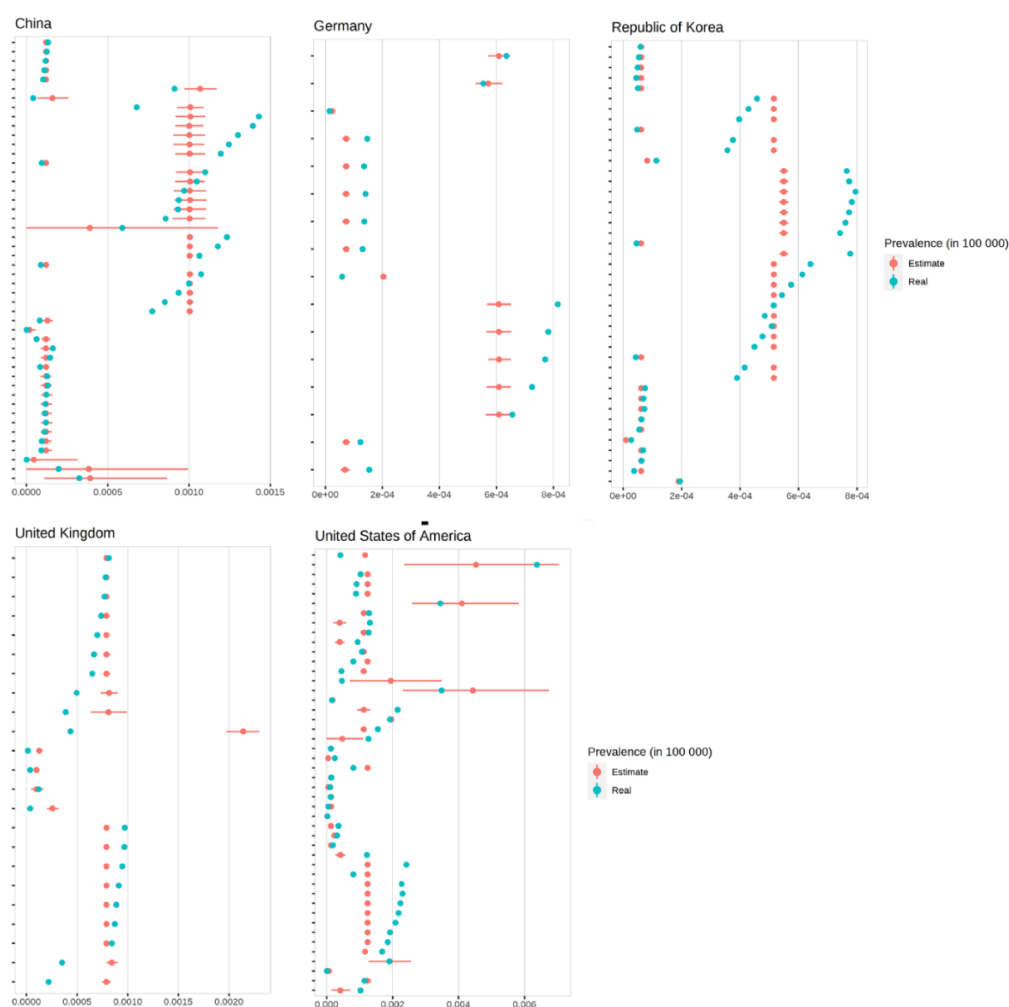

**Figure S4. Compare the predicted number of SLE patients using our model with the actual number of SLE patients in prevalence studies.**

### **Appendix 10 Validate the accuracy of the Bayesian model**

In our study, we included a total of 112 studies, 12 only reported SLE incidence, 46 reported SLE prevalence only, and 54 reported both SLE prevalence and incidence. Of all 66 studies reporting incidence, 43 mentioned SLE classification criteria, 41 used the ACR criteria, only 2 used SLICC criteria, and none of them used EULAR/ACR. Besides, of all 100 studies reporting prevalence, 58 mentioned SLE classification criteria, 57 used ACR criteria, only 1 used SLICC criteria, and none of the study used EULAR/ACR. Given that, we plan to estimate the impact of classification criteria on the epidemiology of SLE by comparing epidemiological data when only using the ACR classification criteria to those without classification criteria limitation. We calculated the SLE incidence and prevalence diagnosed according to the ACR classification criteria. The global SLE incidence and newly diagnosed population according to the ACR classification criteria were estimated to be 4.78 (1.46-12.11) per 100,000 person-years and 0.37 million people annually, which were slightly less than the estimations with no classification criteria limitations (5.14 (1.4-15.13) per 100,000 person-years and 0.40 million people annually). The global SLE prevalence and affected population according to the ACR classification criteria were estimated to be 50.80 (17.64-117.05) per 100,000 person-years and 3.96 million people, which were slightly higher than the estimations with no classification criteria limitation (43.7 (15.87-108.92) per 100,000 person-years and 3.41 million people). The ACR classification criteria did not significantly altered the estimated global incidence and prevalence, but different SLE diagnostic classification criteria may induce potential bias.



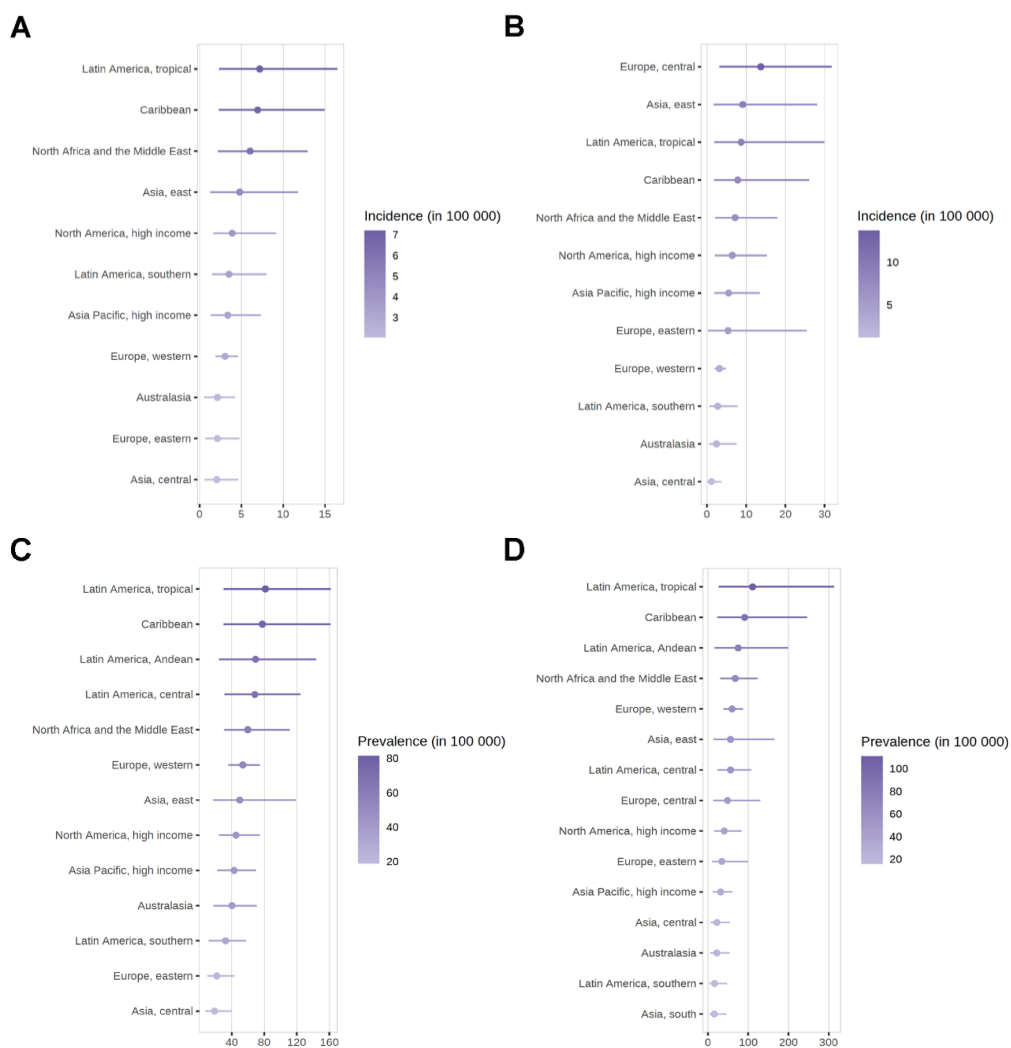

**Figure S5. (A) SLE incidence according to ACR classification criteria for overall population according to world regions; (B) SLE incidence with no classification criteria limitation for overall population according to world regions; (C) SLE prevalence according to ACR classification criteria for overall population according to world regions; (D) SLE prevalence with no classification criteria limitation for overall population according to world regions.**

In our study, self-reported diagnosis was defined as a patient reported that he or she had been diagnosed with SLE by a dermatologist or physician before, but no relevant medical record was provided. Self-reported diagnosis is mainly used when investigating lifetime prevalence or when having questionnaire-based survey, which often relies on patient recall due to the difficulty in integrating patients' clinical data. In our study, only 3 studies reported lifetime prevalence using self-reported diagnosis,

and in view of this, diagnostic methods only affected prevalence data. Our model estimated global SLE prevalence and affected population excluding self-reported diagnoses, as 44.12 (14.75-99.91) per 100,000 person-years and 3.44 million people, respectively, which were slightly higher than the estimations including all diagnostic methods (43.7 (15.87-108.92) per 100,000 person-years and 3.41 million people) (Figure 2). Overall, self-reported diagnosis in our study was based on the physician's former diagnosis rather than the patient's self-judgment, the major driver of this reporting error appears to be recall bias or being unaware of the diagnosis. Combined with the fact that the model only included 3 self-reported studies, and the model estimation showed these self-reported studies had little effect on global prevalence, we speculate that in our study, differences in diagnostic methods would not introduce much bias.

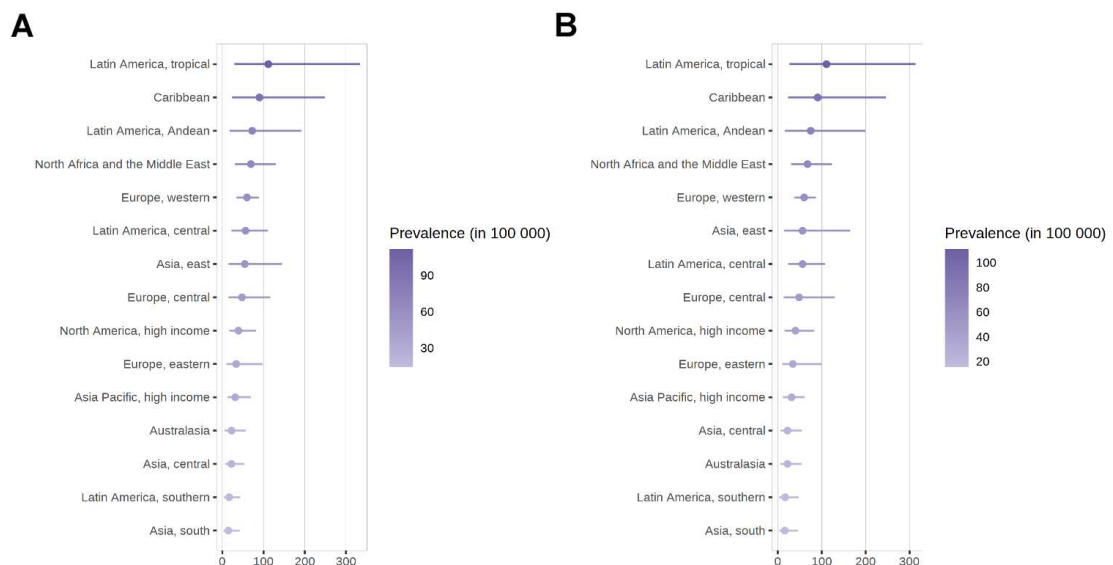

**Figure S6. (A) SLE prevalence excluding self-reported diagnosis for overall population according to world regions. (B) SLE prevalence including all diagnostic methods for overall population according to world regions.**
