# Supplementary material for: Global epidemiology of systemic lupus erythematosus: a comprehensive systematic analysis and modelling study
Source: PubMed Central journal article supplement — Ann Rheum Dis. 2022 Oct 14;82(3):351–6. doi: 10.1136/ard-2022-223035 (PMC9933169; doi:10.1136/ard-2022-223035), 2022-10-14
Supplement: ard-2022-223035supp002.pdf [file ard-2022-223035supp002.pdf]

## SUPPLEMENTARY MATERIAL 2

**The global epidemiology of systemic lupus erythematosus: a comprehensive systematic analysis and modelling study**

Jingru Tian<sup>1,2,3</sup>, Dingyao Zhang<sup>4,5</sup>, Xu Yao<sup>1</sup>, Yaqing Huang<sup>6</sup>, and Qianjin Lu<sup>1,2,3\*</sup>

<sup>1</sup>Institute of Dermatology, Chinese Academy of Medical Sciences and Peking Union Medical College, Nanjing, China

<sup>2</sup>Key Laboratory of Basic and Translational Research on Immune-Mediated Skin Diseases, Chinese Academy of Medical Sciences, Nanjing, China

<sup>3</sup>Jiangsu Key Laboratory of Molecular Biology for Skin Diseases and STIs, Nanjing, China

<sup>4</sup>Graduate Program in Biological and Biomedical Sciences, Yale University, New Haven, USA

<sup>5</sup>Program in Computational Biology and Bioinformatics, Yale University, New Haven, USA

<sup>6</sup>Department of Pathology, Yale University, New Haven, USA

\* Correspondence should be addressed to:

Qianjin Lu, 12 Jiangwangmiao Street, Xuanwu, Nanjing, Jiangsu, China 210042.

Telephone: 025-85478999; Fax: 025-85414477;

Email: qianlu5860@pumcderm.cams.cn

## Appendices index

|                                                                                                                      |    |
|----------------------------------------------------------------------------------------------------------------------|----|
| Table S11. Estimated incidence of SLE diagnosed by physician/ dermatologist for the overall population.....          | 4  |
| Table S12. Estimated adult incidence of SLE diagnosed by physician/ dermatologist8                                   |    |
| Table S13. Estimated incidence of SLE diagnosed by physician/ dermatologist for male .....                           | 12 |
| Table S14. Estimated incidence of SLE diagnosed by physician/ dermatologist for female .....                         | 16 |
| Table S15. Estimated incidence of SLE diagnosed by physician/ dermatologist for male adults .....                    | 19 |
| Table S16. Estimated incidence of SLE diagnosed by physician/ dermatologist for female adults.....                   | 24 |
| Table S17. Estimated period prevalence of SLE diagnosed by physician/ dermatologist for the overall population ..... | 27 |
| Table S18. Estimated adult period prevalence of SLE diagnosed by physician/ dermatologist .....                      | 32 |
| Table S19. Estimated period prevalence of SLE diagnosed by physician/ dermatologist for male.....                    | 36 |
| Table S20. Estimated period prevalence of SLE diagnosed by physician/ dermatologist for male adults.....             | 40 |
| Table S21. Estimated period prevalence of SLE diagnosed by physician/ dermatologist for female.....                  | 45 |
| Table S22. Estimated period prevalence of SLE diagnosed by physician/ dermatologist for female adults.....           | 48 |
| Table S23. Estimated point prevalence of SLE diagnosed by physician/ dermatologist for the overall population .....  | 52 |
| Table S24. Estimated adult point prevalence of SLE diagnosed by physician/ dermatologist .....                       | 56 |
| Table S25. Estimated point prevalence of SLE diagnosed by physician/ dermatologist for male.....                     | 60 |
| Table S26. Estimated point prevalence of SLE diagnosed by physician/ dermatologist for male adults.....              | 64 |
| Table S27. Estimated point prevalence of SLE diagnosed by physician/ dermatologist for female.....                   | 68 |

**Table S28. Estimated point prevalence of SLE diagnosed by physician/ dermatologist for female adults.....72**

**Table S11. Estimated incidence of SLE diagnosed by physician/ dermatologist for the overall population.**

| Country/Region/Super-region                      | Expected Prevalence | 95% Confidence Interval of Prevalence | Expected Patient Number | 95% Confidence Interval of Patient Number | Hierarchy of Region in Estimate |
|--------------------------------------------------|---------------------|---------------------------------------|-------------------------|-------------------------------------------|---------------------------------|
| Global                                           | 5.14                | 1.4-15.13                             | 400902.1                | 108594.75-1178805.7                       | GLOBAL                          |
| Central Europe, eastern Europe, and central Asia | 3.51                | 0.76-10.52                            | 14637.38                | 3167.68-43676.2                           | SUPER-REGION                    |
| Asia, central                                    | 1.18                | 0.16-3.68                             | 1118.91                 | 140.95-3467.35                            | REGION                          |
| Armenia                                          | 1.18                | 0.16-3.68                             | 34.96                   | 4.74-109.04                               | Region                          |
| Azerbaijan                                       | 1.18                | 0.16-3.68                             | 119.64                  | 16.22-373.12                              | Region                          |
| Georgia                                          | 1.18                | 0.16-3.68                             | 47.07                   | 6.38-146.8                                | Region                          |
| Kazakhstan                                       | 0.57                | 0.17-1.24                             | 106.34                  | 29-229.1                                  | Country                         |
| Kyrgyzstan                                       | 1.18                | 0.16-3.68                             | 76.98                   | 10.44-240.09                              | Region                          |
| Mongolia                                         | 1.18                | 0.16-3.68                             | 38.68                   | 5.25-120.64                               | Region                          |
| Tajikistan                                       | 1.18                | 0.16-3.68                             | 112.54                  | 15.26-350.98                              | Region                          |
| Turkmenistan                                     | 1.18                | 0.16-3.68                             | 71.17                   | 9.65-221.95                               | Region                          |
| Uzbekistan                                       | 1.18                | 0.16-3.68                             | 394.93                  | 53.55-1231.65                             | Region                          |
| Europe, central                                  | 13.74               | 3.2-31.82                             | 15615.31                | 3666.33-36478.45                          | REGION                          |
| Albania                                          | 13.74               | 3.2-31.82                             | 395.4                   | 92.09-915.7                               | Region                          |
| Bosnia and Herzegovina                           | 13.74               | 3.2-31.82                             | 450.76                  | 104.98-1043.91                            | Region                          |
| Bulgaria                                         | 13.74               | 3.2-31.82                             | 954.69                  | 222.34-2210.94                            | Region                          |
| Croatia                                          | 13.74               | 3.2-31.82                             | 564.03                  | 131.36-1306.22                            | Region                          |
| Czechia                                          | 13.74               | 3.2-31.82                             | 1471.36                 | 342.68-3407.47                            | Region                          |
| Hungary                                          | 4.43                | 4.28-4.59                             | 426.77                  | 386-470.02                                | Country                         |
| Montenegro                                       | 13.74               | 3.2-31.82                             | 86.29                   | 20.1-199.85                               | Region                          |
| Poland                                           | 81.84               | 80.33-83.51                           | 30971.83                | 30261.7-31708.3                           | Country                         |
| Romania                                          | 13.74               | 3.2-31.82                             | 2643.1                  | 615.57-6121.06                            | Region                          |
| Serbia                                           | 13.74               | 3.2-31.82                             | 1200.5                  | 279.59-2780.2                             | Region                          |
| Slovakia                                         | 13.74               | 3.2-31.82                             | 750.13                  | 174.7-1737.21                             | Region                          |
| Slovenia                                         | 13.74               | 3.2-31.82                             | 285.62                  | 66.52-661.46                              | Region                          |
| North Macedonia                                  | 13.74               | 3.2-31.82                             | 286.25                  | 66.67-662.93                              | Region                          |
| Europe, eastern                                  | 5.39                | 0.23-25.42                            | 3031.96                 | 397.6-9568.42                             | REGION                          |
| Belarus                                          | 5.39                | 0.23-25.42                            | 509.3                   | 21.73-2401.92                             | Region                          |
| Estonia                                          | 7.1                 | 0.36-42.41                            | 23.19                   | 2-87.12                                   | Country                         |
| Latvia                                           | 5.39                | 0.23-25.42                            | 101.64                  | 4.34-479.33                               | Region                          |
| Lithuania                                        | 5.39                | 0.23-25.42                            | 146.7                   | 6.26-691.86                               | Region                          |
| Republic of Moldova                              | 5.39                | 0.23-25.42                            | 217.43                  | 9.28-1025.41                              | Region                          |
| Russia                                           | 5.09                | 0.23-31.51                            | 1765.14                 | 205-6233.9                                | Country                         |
| Ukraine                                          | 2.8                 | 0.09-16.14                            | 299.78                  | 29.97-1122.65                             | Country                         |
| High income                                      | 4.22                | 1.43-10.67                            | 45811.65                | 15602.65-115274.42                        | SUPER-REGION                    |
| Asia Pacific, high income                        | 5.54                | 1.9-13.43                             | 10196.48                | 3451.93-24669.97                          | REGION                          |
| Brunei Darussalam                                | 5.54                | 1.9-13.43                             | 24.24                   | 8.31-58.75                                | Region                          |
| Japan                                            | 4.84                | 3.36-6.62                             | 6116.95                 | 4242.72-8211.35                           | Country                         |
| Republic of Korea                                | 5.3                 | 5.2-5.4                               | 2716.26                 | 2602.98-2822.07                           | Country                         |
| Singapore                                        | 5.54                | 1.9-13.43                             | 324.07                  | 111.14-785.6                              | Region                          |
| Australasia                                      | 2.46                | 0.51-7.57                             | 745.06                  | 147-2300.55                               | REGION                          |
| Australia                                        | 1.34                | 0.8-2.05                              | 341.03                  | 200.98-514.12                             | Country                         |
| New Zealand                                      | 2.46                | 0.51-7.57                             | 118.61                  | 24.59-364.99                              | Region                          |
| Europe, western                                  | 3.19                | 1.96-4.84                             | 13831.58                | 8551.55-21038.62                          | REGION                          |
| Austria                                          | 3.19                | 1.96-4.84                             | 287.27                  | 176.5-435.85                              | Region                          |
| Belgium                                          | 3.19                | 1.96-4.84                             | 369.65                  | 227.12-560.85                             | Region                          |
| Cyprus                                           | 3.19                | 1.96-4.84                             | 38.51                   | 23.66-58.43                               | Region                          |
| Denmark                                          | 1.84                | 1.76-1.93                             | 107.17                  | 86.97-129                                 | Country                         |
| Finland                                          | 2.58                | 2.01-3.17                             | 143.19                  | 105.97-185                                | Country                         |
| France                                           | 4.85                | 4.62-5.08                             | 3162.74                 | 2973.98-3356                              | Country                         |
| Germany                                          | 3.96                | 3.74-4.19                             | 3318.69                 | 3087.98-3548.02                           | Country                         |
| Greece                                           | 3.89                | 3.11-4.79                             | 404.23                  | 317.98-509                                | Country                         |
| Iceland                                          | 3.19                | 1.96-4.84                             | 10.88                   | 6.69-16.51                                | Region                          |

|                                    |       |             |          |                   |              |
|------------------------------------|-------|-------------|----------|-------------------|--------------|
| Ireland                            | 3.19  | 1.96-4.84   | 157.5    | 96.77-238.96      | Region       |
| Israel                             | 3.19  | 1.96-4.84   | 276.07   | 169.62-418.87     | Region       |
| Italy                              | 1.7   | 1.08-2.45   | 1023.9   | 647.85-1474.05    | Country      |
| Luxembourg                         | 3.19  | 1.96-4.84   | 19.97    | 12.27-30.29       | Region       |
| Malta                              | 1.53  | 0.71-2.76   | 6.71     | 1-15              | Country      |
| Netherlands                        | 5.95  | 2.6-10.82   | 1017.22  | 431-1859.37       | Country      |
| Norway                             | 1.68  | 1.03-2.46   | 91.19    | 52.98-140.02      | Country      |
| Portugal                           | 3.19  | 1.96-4.84   | 325.21   | 199.82-493.43     | Region       |
| Spain                              | 4.07  | 3.05-5.19   | 1901.64  | 1398.83-2436.35   | Country      |
| Sweden                             | 5.35  | 4.59-6.2    | 539.06   | 455-632.03        | Country      |
| Switzerland                        | 3.19  | 1.96-4.84   | 276.03   | 169.6-418.8       | Region       |
| United Kingdom                     | 4.04  | 3.89-4.17   | 2739.4   | 2599.92-2882.02   | Country      |
| Latin America, southern            | 2.77  | 0.62-7.79   | 1880     | 417.98-5295.45    | REGION       |
| Argentina                          | 1.8   | 1.22-2.54   | 811.1    | 550.93-1152.02    | Country      |
| Chile                              | 2.77  | 0.62-7.79   | 529.42   | 118.5-1488.86     | Region       |
| Uruguay                            | 2.77  | 0.62-7.79   | 96.16    | 21.52-270.44      | Region       |
| North America, high income         | 6.47  | 2.01-15.32  | 23844.74 | 7436.2-56560.15   | REGION       |
| Canada                             | 3.66  | 3.39-3.95   | 1381.17  | 1258.95-1512.1    | Country      |
| United States of America           | 12.13 | 11.94-12.35 | 40143.03 | 39398.65-40906.03 | Country      |
| Latin America and Caribbean        | 6.5   | 1.39-25.33  | 37989.96 | 8039.65-148195.22 | SUPER-REGION |
| Caribbean                          | 7.88  | 1.78-26.12  | 3263.28  | 758.9-9807.67     | REGION       |
| Antigua and Barbuda                | 7.88  | 1.78-26.12  | 7.72     | 1.74-25.58        | Region       |
| Bahamas                            | 7.88  | 1.78-26.12  | 30.99    | 7-102.71          | Region       |
| Barbados                           | 10.37 | 2.01-36.46  | 22.96    | 14-33             | Country      |
| Belize                             | 7.88  | 1.78-26.12  | 31.33    | 7.08-103.86       | Region       |
| Cuba                               | 7.88  | 1.78-26.12  | 892.29   | 201.56-2957.69    | Region       |
| Dominican Republic                 | 7.88  | 1.78-26.12  | 854.63   | 193.05-2832.85    | Region       |
| Grenada                            | 7.88  | 1.78-26.12  | 8.87     | 2-29.39           | Region       |
| Guyana                             | 7.88  | 1.78-26.12  | 61.97    | 14-205.42         | Region       |
| Haiti                              | 7.88  | 1.78-26.12  | 898.49   | 202.96-2978.26    | Region       |
| Jamaica                            | 7.88  | 1.78-26.12  | 233.32   | 52.7-773.4        | Region       |
| Puerto Rico                        | 7.88  | 1.78-26.12  | 225.3    | 50.89-746.82      | Region       |
| Saint Lucia                        | 7.88  | 1.78-26.12  | 14.47    | 3.27-47.96        | Region       |
| Saint Vincent and the Grenadines   | 7.88  | 1.78-26.12  | 8.74     | 1.97-28.98        | Region       |
| Suriname                           | 7.88  | 1.78-26.12  | 46.22    | 10.44-153.22      | Region       |
| Trinidad and Tobago                | 7.88  | 1.78-26.12  | 110.27   | 24.91-365.52      | Region       |
| Virgin Island (US)                 | 7.88  | 1.78-26.12  | 8.23     | 1.86-27.27        | Region       |
| Latin America, Andean              | 6.5   | 1.39-25.33  | 37989.96 | 8039.65-148195.22 | REGION       |
| Bolivia                            | 6.5   | 1.39-25.33  | 758.65   | 162.23-2956.4     | Super-region |
| Ecuador                            | 6.5   | 1.39-25.33  | 1146.64  | 245.2-4468.35     | Super-region |
| Peru                               | 6.5   | 1.39-25.33  | 2143.07  | 458.29-8351.39    | Super-region |
| Latin America, central             | 6.5   | 1.39-25.33  | 37989.96 | 8039.65-148195.22 | REGION       |
| Colombia                           | 6.5   | 1.39-25.33  | 3307.13  | 707.22-12887.62   | Super-region |
| Costa Rica                         | 6.5   | 1.39-25.33  | 331.08   | 70.8-1290.18      | Super-region |
| El Salvador                        | 6.5   | 1.39-25.33  | 421.59   | 90.15-1642.9      | Super-region |
| Guatemala                          | 6.5   | 1.39-25.33  | 1164.48  | 249.02-4537.9     | Super-region |
| Honduras                           | 6.5   | 1.39-25.33  | 643.77   | 137.67-2508.71    | Super-region |
| Mexico                             | 6.5   | 1.39-25.33  | 8379.79  | 1791.99-32655.38  | Super-region |
| Nicaragua                          | 6.5   | 1.39-25.33  | 430.57   | 92.08-1677.89     | Super-region |
| Panama                             | 6.5   | 1.39-25.33  | 280.39   | 59.96-1092.65     | Super-region |
| Venezuela (Bolivarian Republic of) | 6.5   | 1.39-25.33  | 1848.15  | 395.22-7202.1     | Super-region |
| Latin America, tropical            | 8.72  | 1.87-29.99  | 19165.22 | 4067.88-65712.4   | REGION       |
| Brazil                             | 8     | 6.16-10.04  | 16995.83 | 13031.52-21356.97 | Country      |
| Paraguay                           | 8.72  | 1.87-29.99  | 621.93   | 133.37-2138.95    | Region       |

|                                                |      |            |           |                     |              |
|------------------------------------------------|------|------------|-----------|---------------------|--------------|
| <b>North Africa and Middle East</b>            | 5.98 | 1.05-22.12 | 37151.32  | 6549.18-137394.6    | SUPER-REGION |
| <b>North Africa and the Middle East</b>        | 7.18 | 2.13-17.94 | 44586.54  | 13114.93-111699.62  | REGION       |
| <b>Afghanistan</b>                             | 7.18 | 2.13-17.94 | 2795.05   | 829.17-6983.74      | Region       |
| <b>Algeria</b>                                 | 7.18 | 2.13-17.94 | 3148.44   | 934.01-7866.7       | Region       |
| <b>Bahrain</b>                                 | 7.18 | 2.13-17.94 | 122.17    | 36.24-305.26        | Region       |
| <b>Egypt</b>                                   | 7.18 | 2.13-17.94 | 7347.54   | 2179.7-18358.62     | Region       |
| <b>Iran (Islamic Republic of)</b>              | 7.18 | 2.13-17.94 | 6030.66   | 1789.04-15068.24    | Region       |
| <b>Iraq</b>                                    | 7.18 | 2.13-17.94 | 2887.96   | 856.74-7215.89      | Region       |
| <b>Jordan</b>                                  | 7.18 | 2.13-17.94 | 732.58    | 217.33-1830.44      | Region       |
| <b>Kuwait</b>                                  | 7.18 | 2.13-17.94 | 306.63    | 90.96-766.14        | Region       |
| <b>Lebanon</b>                                 | 7.18 | 2.13-17.94 | 490.06    | 145.38-1224.46      | Region       |
| <b>Libya</b>                                   | 7.18 | 2.13-17.94 | 493.36    | 146.36-1232.7       | Region       |
| <b>Morocco</b>                                 | 7.18 | 2.13-17.94 | 2650.17   | 786.19-6621.74      | Region       |
| <b>Palestine</b>                               | 7.18 | 2.13-17.94 | 366.28    | 108.66-915.19       | Region       |
| <b>Oman</b>                                    | 7.18 | 2.13-17.94 | 366.64    | 108.77-916.09       | Region       |
| <b>Qatar</b>                                   | 7.18 | 2.13-17.94 | 206.85    | 61.36-516.85        | Region       |
| <b>Saudi Arabia</b>                            | 7.18 | 2.13-17.94 | 2499.61   | 741.53-6245.55      | Region       |
| <b>Sudan</b>                                   | 7.18 | 2.13-17.94 | 3148.36   | 933.98-7866.51      | Region       |
| <b>Syrian Arab Republic</b>                    | 7.18 | 2.13-17.94 | 1256.54   | 372.76-3139.59      | Region       |
| <b>Sudan</b>                                   | 7.18 | 2.13-17.94 | 3148.36   | 933.98-7866.51      | Region       |
| <b>Tunisia</b>                                 | 7.18 | 2.13-17.94 | 848.56    | 251.73-2120.22      | Region       |
| <b>Turkey</b>                                  | 6.19 | 4.17-8.45  | 5220.7    | 3566.8-7092.2       | Country      |
| <b>United Arab Emirates</b>                    | 8.51 | 4.21-14.2  | 841.43    | 400.95-1405.22      | Country      |
| <b>Yemen</b>                                   | 7.18 | 2.13-17.94 | 2141.5    | 635.29-5350.76      | Region       |
| <b>South Asia</b>                              | 5.14 | 1.4-15.13  | 400902.1  | 108594.75-1178805.7 | SUPER-REGION |
| <b>Asia, south</b>                             | 5.14 | 1.4-15.13  | 400902.1  | 108594.75-1178805.7 | REGION       |
| <b>Bangladesh</b>                              | 5.14 | 1.4-15.13  | 8464.74   | 2305.57-24916.64    | Global       |
| <b>Bhutan</b>                                  | 5.14 | 1.4-15.13  | 39.66     | 10.8-116.73         | Global       |
| <b>India</b>                                   | 5.14 | 1.4-15.13  | 70929.76  | 19319.39-208787.41  | Global       |
| <b>Nepal</b>                                   | 5.14 | 1.4-15.13  | 1497.63   | 407.91-4408.38      | Global       |
| <b>Pakistan</b>                                | 5.14 | 1.4-15.13  | 11353.82  | 3092.48-33420.88    | Global       |
| <b>South East Asia, east Asia, and Oceania</b> | 7.4  | 1.11-29.7  | 162392.15 | 24299.95-651615.9   | SUPER-REGION |
| <b>Asia, east</b>                              | 9.15 | 1.74-28.09 | 137019.43 | 25866.37-420444.9   | REGION       |
| <b>China</b>                                   | 8.57 | 8.37-8.77  | 126063.33 | 123120.98-129098.27 | Country      |
| <b>Dem. People's Republic of Korea</b>         | 9.15 | 1.74-28.09 | 2358.74   | 448.55-7241.19      | Region       |
| <b>Asia, South East</b>                        | 7.4  | 1.11-29.7  | 162392.15 | 24299.95-651615.9   | REGION       |
| <b>Cambodia</b>                                | 7.4  | 1.11-29.7  | 1237.2    | 185.58-4965.52      | Super-region |
| <b>Indonesia</b>                               | 7.4  | 1.11-29.7  | 20240.63  | 3036.09-81236.05    | Super-region |
| <b>Lao People's Democratic Republic</b>        | 7.4  | 1.11-29.7  | 538.39    | 80.76-2160.83       | Super-region |
| <b>Malaysia</b>                                | 7.4  | 1.11-29.7  | 2395      | 359.25-9612.38      | Super-region |
| <b>Maldives</b>                                | 7.4  | 1.11-29.7  | 40        | 6-160.54            | Super-region |
| <b>Mauritius</b>                               | 7.4  | 1.11-29.7  | 94.1      | 14.12-377.68        | Super-region |
| <b>Myanmar</b>                                 | 7.4  | 1.11-29.7  | 4026.31   | 603.95-16159.64     | Super-region |
| <b>Philippines</b>                             | 7.4  | 1.11-29.7  | 8108.87   | 1216.33-32545.05    | Super-region |
| <b>Seychelles</b>                              | 7.4  | 1.11-29.7  | 7.28      | 1.09-29.21          | Super-region |
| <b>Sri Lanka</b>                               | 7.4  | 1.11-29.7  | 1584.54   | 237.68-6359.56      | Super-region |
| <b>Thailand</b>                                | 7.4  | 1.11-29.7  | 5164.55   | 774.68-20727.99     | Super-region |
| <b>Timor-Leste</b>                             | 7.4  | 1.11-29.7  | 97.56     | 14.63-391.58        | Super-region |
| <b>Vietnam</b>                                 | 7.4  | 1.11-29.7  | 7201.29   | 1080.19-28902.48    | Super-region |
| <b>Oceania</b>                                 | 7.4  | 1.11-29.7  | 162392.15 | 24299.95-651615.9   | REGION       |
| <b>Fiji</b>                                    | 7.4  | 1.11-29.7  | 66.34     | 9.95-266.24         | Super-region |
| <b>Guam</b>                                    | 7.4  | 1.11-29.7  | 12.49     | 1.87-50.13          | Super-region |
| <b>Kiribati</b>                                | 7.4  | 1.11-29.7  | 8.84      | 1.33-35.47          | Super-region |
| <b>Marshall Islands</b>                        | 7.4  | 1.11-29.7  | 4.13      | 0.62-16.58          | Super-region |
| <b>Micronesia (Fed. States of)</b>             | 7.4  | 1.11-29.7  | 8.51      | 1.28-34.16          | Super-region |

|                                  |      |           |          |                     |              |
|----------------------------------|------|-----------|----------|---------------------|--------------|
| Papua New Guinea                 | 7.4  | 1.11-29.7 | 662.08   | 99.31-2657.27       | Super-region |
| Samoa                            | 7.4  | 1.11-29.7 | 14.68    | 2.2-58.93           | Super-region |
| Solomon Islands                  | 7.4  | 1.11-29.7 | 50.83    | 7.62-204            | Super-region |
| Tonga                            | 7.4  | 1.11-29.7 | 7.82     | 1.17-31.39          | Super-region |
| Vanuatu                          | 7.4  | 1.11-29.7 | 22.73    | 3.41-91.22          | Super-region |
| Sub-Saharan Africa               | 5.14 | 1.4-15.13 | 400902.1 | 108594.75-1178805.7 | SUPER-REGION |
| Sub-Saharan Africa, central      | 5.14 | 1.4-15.13 | 400902.1 | 108594.75-1178805.7 | REGION       |
| Angola                           | 5.14 | 1.4-15.13 | 1689.32  | 460.13-4972.66      | Global       |
| Central African Republic         | 5.14 | 1.4-15.13 | 248.25   | 67.62-730.74        | Global       |
| Congo                            | 5.14 | 1.4-15.13 | 283.63   | 77.25-834.89        | Global       |
| Democratic Republic of the Congo | 5.14 | 1.4-15.13 | 4603.45  | 1253.86-13550.61    | Global       |
| Equatorial Guinea                | 5.14 | 1.4-15.13 | 72.11    | 19.64-212.27        | Global       |
| Gabon                            | 5.14 | 1.4-15.13 | 114.4    | 31.16-336.75        | Global       |
| Sub-Saharan Africa, eastern      | 5.14 | 1.4-15.13 | 400902.1 | 108594.75-1178805.7 | REGION       |
| Burundi                          | 5.14 | 1.4-15.13 | 611.19   | 166.47-1799.07      | Global       |
| Comoros                          | 5.14 | 1.4-15.13 | 44.7     | 12.17-131.57        | Global       |
| Djibouti                         | 5.14 | 1.4-15.13 | 50.78    | 13.83-149.48        | Global       |
| Eritrea                          | 5.14 | 1.4-15.13 | 182.28   | 49.65-536.57        | Global       |
| Ethiopia                         | 5.14 | 1.4-15.13 | 5909.11  | 1609.48-17393.92    | Global       |
| Kenya                            | 5.14 | 1.4-15.13 | 2763.84  | 752.8-8135.6        | Global       |
| Madagascar                       | 5.14 | 1.4-15.13 | 1423.31  | 387.67-4189.63      | Global       |
| Malawi                           | 5.14 | 1.4-15.13 | 983.28   | 267.82-2894.36      | Global       |
| Mozambique                       | 5.14 | 1.4-15.13 | 1606.53  | 437.58-4728.95      | Global       |
| Rwanda                           | 5.14 | 1.4-15.13 | 665.74   | 181.33-1959.67      | Global       |
| Somalia                          | 5.14 | 1.4-15.13 | 816.91   | 222.5-2404.64       | Global       |
| South Sudan                      | 5.14 | 1.4-15.13 | 575.36   | 156.71-1693.61      | Global       |
| Uganda                           | 5.14 | 1.4-15.13 | 2351.09  | 640.37-6920.61      | Global       |
| United Republic of Tanzania      | 5.14 | 1.4-15.13 | 3070.34  | 836.28-9037.79      | Global       |
| Zambia                           | 5.14 | 1.4-15.13 | 944.94   | 257.38-2781.49      | Global       |
| Sub-Saharan Africa, southern     | 5.14 | 1.4-15.13 | 400902.1 | 108594.75-1178805.7 | REGION       |
| Botswana                         | 5.14 | 1.4-15.13 | 120.87   | 32.92-355.8         | Global       |
| Lesotho                          | 5.14 | 1.4-15.13 | 110.11   | 29.99-324.12        | Global       |
| Namibia                          | 5.14 | 1.4-15.13 | 130.6    | 35.57-384.44        | Global       |
| South Africa                     | 5.14 | 1.4-15.13 | 3048.46  | 830.32-8973.4       | Global       |
| Eswatini                         | 5.14 | 1.4-15.13 | 59.63    | 16.24-175.53        | Global       |
| Zimbabwe                         | 5.14 | 1.4-15.13 | 763.95   | 208.08-2248.76      | Global       |
| Sub-Saharan Africa, western      | 5.14 | 1.4-15.13 | 400902.1 | 108594.75-1178805.7 | REGION       |
| Benin                            | 5.14 | 1.4-15.13 | 623.13   | 169.72-1834.23      | Global       |
| Burkina Faso                     | 5.14 | 1.4-15.13 | 1074.43  | 292.65-3162.67      | Global       |
| Cote d'Ivoire                    | 5.14 | 1.4-15.13 | 1355.84  | 369.3-3991.03       | Global       |
| Cameroon                         | 5.14 | 1.4-15.13 | 1364.46  | 371.64-4016.39      | Global       |
| Cabo Verde                       | 5.14 | 1.4-15.13 | 28.58    | 7.78-84.12          | Global       |
| Chad                             | 5.14 | 1.4-15.13 | 844.29   | 229.96-2485.23      | Global       |
| Gambia                           | 5.14 | 1.4-15.13 | 124.22   | 33.83-365.64        | Global       |
| Ghana                            | 5.14 | 1.4-15.13 | 1597.15  | 435.02-4701.33      | Global       |
| Guinea                           | 5.14 | 1.4-15.13 | 675.03   | 183.86-1986.99      | Global       |
| Guinea-Bissau                    | 5.14 | 1.4-15.13 | 101.16   | 27.55-297.76        | Global       |
| Liberia                          | 5.14 | 1.4-15.13 | 259.96   | 70.81-765.23        | Global       |
| Mali                             | 5.14 | 1.4-15.13 | 1040.89  | 283.51-3063.95      | Global       |
| Mauritania                       | 5.14 | 1.4-15.13 | 238.99   | 65.1-703.49         | Global       |
| Niger                            | 5.14 | 1.4-15.13 | 1244.22  | 338.89-3662.46      | Global       |
| Nigeria                          | 5.14 | 1.4-15.13 | 10595.57 | 2885.95-31188.91    | Global       |
| Sao Tome and Principe            | 5.14 | 1.4-15.13 | 11.26    | 3.07-33.16          | Global       |
| Senegal                          | 5.14 | 1.4-15.13 | 860.64   | 234.41-2533.36      | Global       |

|              |      |           |        |                |        |
|--------------|------|-----------|--------|----------------|--------|
| Sierra Leone | 5.14 | 1.4-15.13 | 410.02 | 111.68-1206.92 | Global |
| Togo         | 5.14 | 1.4-15.13 | 425.53 | 115.9-1252.57  | Global |

**Table S12. Estimated adult incidence of SLE diagnosed by physician/ dermatologist.**

| Country/Region/Super-region                             | Expected Prevalence | 95% Confidence Interval of Prevalence | Expected Patient Number | 95% Confidence Interval of Patient Number | Hierarchy of Region in Estimate |
|---------------------------------------------------------|---------------------|---------------------------------------|-------------------------|-------------------------------------------|---------------------------------|
| Global                                                  | 7.31                | 1.98-21.54                            | 379811.3                | 102834.15-1120152.35                      | GLOBAL                          |
| <b>Central Europe, eastern Europe, and central Asia</b> | 4.51                | 0.98-13.54                            | 14138.09                | 3068.9-42011.42                           | SUPER-REGION                    |
| <b>Asia, central</b>                                    | 1.74                | 0.23-5.41                             | 1051.45                 | 136.92-3289.82                            | REGION                          |
| Armenia                                                 | 1.74                | 0.23-5.41                             | 37.85                   | 5-117.68                                  | Region                          |
| Azerbaijan                                              | 1.74                | 0.23-5.41                             | 123.85                  | 16.37-385.06                              | Region                          |
| Georgia                                                 | 1.74                | 0.23-5.41                             | 51.59                   | 6.82-160.4                                | Region                          |
| Kazakhstan                                              | 0.82                | 0.24-1.81                             | 100.83                  | 26.98-218.05                              | Country                         |
| Kyrgyzstan                                              | 1.74                | 0.23-5.41                             | 67.76                   | 8.96-210.66                               | Region                          |
| Mongolia                                                | 1.74                | 0.23-5.41                             | 35.5                    | 4.69-110.38                               | Region                          |
| Tajikistan                                              | 1.74                | 0.23-5.41                             | 89.99                   | 11.89-279.79                              | Region                          |
| Turkmenistan                                            | 1.74                | 0.23-5.41                             | 64.2                    | 8.49-199.6                                | Region                          |
| Uzbekistan                                              | 1.74                | 0.23-5.41                             | 370.52                  | 48.98-1152.01                             | Region                          |
| <b>Europe, central</b>                                  | 16.76               | 3.91-38.81                            | 15199.06                | 3555.9-35172.42                           | REGION                          |
| Albania                                                 | 16.76               | 3.91-38.81                            | 365.73                  | 85.32-846.89                              | Region                          |
| Bosnia and Herzegovina                                  | 16.76               | 3.91-38.81                            | 442.33                  | 103.19-1024.26                            | Region                          |
| Bulgaria                                                | 16.76               | 3.91-38.81                            | 940.74                  | 219.47-2178.41                            | Region                          |
| Croatia                                                 | 16.76               | 3.91-38.81                            | 554.95                  | 129.47-1285.06                            | Region                          |
| Czechia                                                 | 16.76               | 3.91-38.81                            | 1430.23                 | 333.66-3311.9                             | Region                          |
| Hungary                                                 | 5.36                | 5.18-5.55                             | 416.08                  | 373-457                                   | Country                         |
| Montenegro                                              | 16.76               | 3.91-38.81                            | 79.71                   | 18.59-184.57                              | Region                          |
| Poland                                                  | 99.37               | 97.45-101.45                          | 30160.1                 | 29478.88-30870.03                         | Country                         |
| Romania                                                 | 16.76               | 3.91-38.81                            | 2556.93                 | 596.52-5920.92                            | Region                          |
| Serbia                                                  | 16.76               | 3.91-38.81                            | 1153.37                 | 269.07-2670.79                            | Region                          |
| Slovakia                                                | 16.76               | 3.91-38.81                            | 728.62                  | 169.98-1687.22                            | Region                          |
| Slovenia                                                | 16.76               | 3.91-38.81                            | 280.26                  | 65.38-648.98                              | Region                          |
| North Macedonia                                         | 16.76               | 3.91-38.81                            | 271.91                  | 63.43-629.64                              | Region                          |
| <b>Europe, eastern</b>                                  | 6.74                | 0.29-31.81                            | 2943.86                 | 387.92-9151.2                             | REGION                          |
| Belarus                                                 | 6.74                | 0.29-31.81                            | 497.16                  | 21.39-2346.37                             | Region                          |
| Estonia                                                 | 8.76                | 0.44-52.34                            | 22.15                   | 1.98-90.05                                | Country                         |
| Latvia                                                  | 6.74                | 0.29-31.81                            | 100.37                  | 4.32-473.7                                | Region                          |
| Lithuania                                               | 6.74                | 0.29-31.81                            | 146.81                  | 6.32-692.89                               | Region                          |
| Republic of Moldova                                     | 6.74                | 0.29-31.81                            | 215.04                  | 9.25-1014.91                              | Region                          |
| Russia                                                  | 6.43                | 0.3-39.71                             | 1712.81                 | 199.95-6228.62                            | Country                         |
| Ukraine                                                 | 3.43                | 0.11-19.78                            | 292.33                  | 27.98-1083.15                             | Country                         |
| <b>High income</b>                                      | 5.26                | 1.79-13.28                            | 44417.36                | 15167.75-112166.45                        | SUPER-REGION                    |
| <b>Asia Pacific, high income</b>                        | 6.54                | 2.24-15.85                            | 9972.56                 | 3417.98-24074.4                           | REGION                          |
| Brunei Darussalam                                       | 6.54                | 2.24-15.85                            | 20.01                   | 6.86-48.51                                | Region                          |
| Japan                                                   | 5.7                 | 3.96-7.8                              | 5981.28                 | 4147.95-8109.82                           | Country                         |
| Republic of Korea                                       | 6.27                | 6.15-6.39                             | 2654.72                 | 2547.97-2768.03                           | Country                         |
| Singapore                                               | 6.54                | 2.24-15.85                            | 318.16                  | 108.97-771.06                             | Region                          |
| <b>Australasia</b>                                      | 3.17                | 0.66-9.78                             | 716.7                   | 145.98-2210.57                            | REGION                          |
| Australia                                               | 1.73                | 1.03-2.65                             | 328.72                  | 194.98-503.02                             | Country                         |
| New Zealand                                             | 3.17                | 0.66-9.78                             | 113.53                  | 23.64-350.25                              | Region                          |
| <b>Europe, western</b>                                  | 3.92                | 2.41-5.96                             | 13437.09                | 8246.97-20375.72                          | REGION                          |
| Austria                                                 | 3.92                | 2.41-5.96                             | 284.39                  | 174.84-432.39                             | Region                          |
| Belgium                                                 | 3.92                | 2.41-5.96                             | 351.73                  | 216.24-534.78                             | Region                          |
| Cyprus                                                  | 3.92                | 2.41-5.96                             | 36.58                   | 22.49-55.62                               | Region                          |
| Denmark                                                 | 2.29                | 2.19-2.41                             | 103.84                  | 85-126                                    | Country                         |
| Finland                                                 | 3.18                | 2.48-3.91                             | 139.16                  | 102-178.02                                | Country                         |



|                                    |       |             |          |                   |              |
|------------------------------------|-------|-------------|----------|-------------------|--------------|
| France                             | 6.14  | 5.85-6.43   | 3060.27  | 2876.9-3243.03    | Country      |
| Germany                            | 4.76  | 4.5-5.03    | 3236.56  | 3023.9-3454.13    | Country      |
| Greece                             | 4.66  | 3.73-5.75   | 394.02   | 308.92-488.07     | Country      |
| Iceland                            | 3.92  | 2.41-5.96   | 9.93     | 6.11-15.1         | Region       |
| Ireland                            | 3.92  | 2.41-5.96   | 140.98   | 86.67-214.35      | Region       |
| Israel                             | 3.92  | 2.41-5.96   | 218.66   | 134.43-332.46     | Region       |
| Italy                              | 2.01  | 1.29-2.91   | 1001.24  | 627.95-1448.07    | Country      |
| Luxembourg                         | 3.92  | 2.41-5.96   | 19.37    | 11.91-29.45       | Region       |
| Malta                              | 1.84  | 0.85-3.31   | 6.56     | 1-14              | Country      |
| Netherlands                        | 7.36  | 3.21-13.4   | 988.4    | 427.8-1789.17     | Country      |
| Norway                             | 2.12  | 1.3-3.1     | 88.37    | 51-133            | Country      |
| Portugal                           | 3.92  | 2.41-5.96   | 326.87   | 200.96-496.97     | Region       |
| Spain                              | 4.91  | 3.68-6.25   | 1854.77  | 1376.77-2357.32   | Country      |
| Sweden                             | 6.72  | 5.77-7.8    | 521.32   | 434-607.03        | Country      |
| Switzerland                        | 3.92  | 2.41-5.96   | 271.78   | 167.09-413.21     | Region       |
| United Kingdom                     | 5.08  | 4.9-5.25    | 2651.92  | 2514.87-2797      | Country      |
| Latin America, southern            | 3.79  | 0.84-10.62  | 1795.07  | 400.97-5121.62    | REGION       |
| Argentina                          | 2.52  | 1.71-3.56   | 770.69   | 521.73-1087       | Country      |
| Chile                              | 3.79  | 0.84-10.62  | 537.82   | 119.2-1507.03     | Region       |
| Uruguay                            | 3.79  | 0.84-10.62  | 95.49    | 21.16-267.58      | Region       |
| North America, high income         | 8.26  | 2.56-19.55  | 23022.88 | 7115.08-54479.95  | REGION       |
| Canada                             | 4.5   | 4.17-4.86   | 1342.31  | 1220.95-1463.2    | Country      |
| United States of America           | 15.56 | 15.29-15.83 | 38728.66 | 37965.58-39476    | Country      |
| Latin America and Caribbean        | 9.13  | 1.94-35.6   | 36097.18 | 7624.85-140800.75 | SUPER-REGION |
| Caribbean                          | 11.06 | 2.5-36.67   | 3100.02  | 727.85-8931.12    | REGION       |
| Antigua and Barbuda                | 11.06 | 2.5-36.67   | 7.68     | 1.74-25.48        | Region       |
| Bahamas                            | 11.06 | 2.5-36.67   | 30.5     | 6.89-101.13       | Region       |
| Barbados                           | 13.1  | 2.53-45.98  | 22.35    | 13-32             | Country      |
| Belize                             | 11.06 | 2.5-36.67   | 26.73    | 6.04-88.61        | Region       |
| Cuba                               | 11.06 | 2.5-36.67   | 981.84   | 221.93-3255.33    | Region       |
| Dominican Republic                 | 11.06 | 2.5-36.67   | 764.28   | 172.76-2534       | Region       |
| Grenada                            | 11.06 | 2.5-36.67   | 8.65     | 1.96-28.69        | Region       |
| Guyana                             | 11.06 | 2.5-36.67   | 54.58    | 12.34-180.95      | Region       |
| Haiti                              | 11.06 | 2.5-36.67   | 724.97   | 163.87-2403.68    | Region       |
| Jamaica                            | 11.06 | 2.5-36.67   | 224.47   | 50.74-744.24      | Region       |
| Puerto Rico                        | 11.06 | 2.5-36.67   | 246      | 55.6-815.61       | Region       |
| Saint Lucia                        | 11.06 | 2.5-36.67   | 15.2     | 3.44-50.4         | Region       |
| Saint Vincent and the Grenadines   | 11.06 | 2.5-36.67   | 8.58     | 1.94-28.44        | Region       |
| Suriname                           | 11.06 | 2.5-36.67   | 41.98    | 9.49-139.18       | Region       |
| Trinidad and Tobago                | 11.06 | 2.5-36.67   | 113.82   | 25.73-377.39      | Region       |
| Virgin Island (US)                 | 11.06 | 2.5-36.67   | 8.57     | 1.94-28.43        | Region       |
| Latin America, Andean              | 9.13  | 1.94-35.6   | 36097.18 | 7624.85-140800.75 | REGION       |
| Bolivia                            | 9.13  | 1.94-35.6   | 639.94   | 135.98-2495.29    | Super-region |
| Ecuador                            | 9.13  | 1.94-35.6   | 1026.84  | 218.19-4003.87    | Super-region |
| Peru                               | 9.13  | 1.94-35.6   | 2044.24  | 434.37-7970.97    | Super-region |
| Latin America, central             | 9.13  | 1.94-35.6   | 36097.18 | 7624.85-140800.75 | REGION       |
| Colombia                           | 9.13  | 1.94-35.6   | 3226.98  | 685.69-12582.77   | Super-region |
| Costa Rica                         | 9.13  | 1.94-35.6   | 334.98   | 71.18-1306.18     | Super-region |
| El Salvador                        | 9.13  | 1.94-35.6   | 381.02   | 80.96-1485.7      | Super-region |
| Guatemala                          | 9.13  | 1.94-35.6   | 912.64   | 193.92-3558.59    | Super-region |
| Honduras                           | 9.13  | 1.94-35.6   | 532.6    | 113.17-2076.72    | Super-region |
| Mexico                             | 9.13  | 1.94-35.6   | 7705.73  | 1637.36-30046.43  | Super-region |
| Nicaragua                          | 9.13  | 1.94-35.6   | 371.3    | 78.9-1447.79      | Super-region |
| Panama                             | 9.13  | 1.94-35.6   | 256.85   | 54.58-1001.53     | Super-region |
| Venezuela (Bolivarian Republic of) | 9.13  | 1.94-35.6   | 1659.82  | 352.69-6472.04    | Super-region |
| Latin America, tropical            | 11.71 | 2.51-40.13  | 18356.18 | 3910.65-62980.45  | REGION       |
| Brazil                             | 10.69 | 8.25-13.41  | 16289.8  | 12552.3-20449.65  | Country      |

|                                         |       |             |           |                      |              |
|-----------------------------------------|-------|-------------|-----------|----------------------|--------------|
| Paraguay                                | 11.71 | 2.51-40.13  | 516.65    | 110.74-1770.54       | Region       |
| North Africa and Middle East            | 9.12  | 1.59-33.71  | 34629.41  | 6072.42-128027.03    | SUPER-REGION |
| North Africa and the Middle East        | 10.95 | 3.25-27.36  | 41558.35  | 12305.75-104015.62   | REGION       |
| Afghanistan                             | 10.95 | 3.25-27.36  | 1972.97   | 585.59-4929.73       | Region       |
| Algeria                                 | 10.95 | 3.25-27.36  | 3004.77   | 891.83-7507.81       | Region       |
| Bahrain                                 | 10.95 | 3.25-27.36  | 142.52    | 42.3-356.11          | Region       |
| Egypt                                   | 10.95 | 3.25-27.36  | 6451.68   | 1914.88-16120.37     | Region       |
| Iran (Islamic Republic of)              | 10.95 | 3.25-27.36  | 6315.81   | 1874.56-15780.88     | Region       |
| Iraq                                    | 10.95 | 3.25-27.36  | 2288.7    | 679.29-5718.61       | Region       |
| Jordan                                  | 10.95 | 3.25-27.36  | 636.27    | 188.85-1589.81       | Region       |
| Kuwait                                  | 10.95 | 3.25-27.36  | 342.63    | 101.69-856.1         | Region       |
| Lebanon                                 | 10.95 | 3.25-27.36  | 496.93    | 147.49-1241.63       | Region       |
| Libya                                   | 10.95 | 3.25-27.36  | 481.81    | 143-1203.86          | Region       |
| Morocco                                 | 10.95 | 3.25-27.36  | 2634.65   | 781.97-6583          | Region       |
| Palestine                               | 10.95 | 3.25-27.36  | 287.7     | 85.39-718.85         | Region       |
| Oman                                    | 10.95 | 3.25-27.36  | 409.92    | 121.66-1024.23       | Region       |
| Qatar                                   | 10.95 | 3.25-27.36  | 260.83    | 77.42-651.72         | Region       |
| Saudi Arabia                            | 10.95 | 3.25-27.36  | 2627.68   | 779.9-6565.6         | Region       |
| Sudan                                   | 10.95 | 3.25-27.36  | 2364.82   | 701.89-5908.81       | Region       |
| Syrian Arab Republic                    | 10.95 | 3.25-27.36  | 1154.07   | 342.53-2883.6        | Region       |
| Sudan                                   | 10.95 | 3.25-27.36  | 2364.82   | 701.89-5908.81       | Region       |
| Tunisia                                 | 10.95 | 3.25-27.36  | 893.59    | 265.22-2232.76       | Region       |
| Turkey                                  | 8.66  | 5.84-11.83  | 4962.63   | 3304.8-6801.77       | Country      |
| United Arab Emirates                    | 10.09 | 4.99-16.87  | 809.94    | 388.92-1347.07       | Country      |
| Yemen                                   | 10.95 | 3.25-27.36  | 1647.12   | 488.87-4115.55       | Region       |
| South Asia                              | 7.31  | 1.98-21.54  | 379811.3  | 102834.15-1120152.35 | SUPER-REGION |
| Asia, south                             | 7.31  | 1.98-21.54  | 379811.3  | 102834.15-1120152.35 | REGION       |
| Bangladesh                              | 7.31  | 1.98-21.54  | 7678.18   | 2079.72-22624.89     | Global       |
| Bhutan                                  | 7.31  | 1.98-21.54  | 37.26     | 10.09-109.79         | Global       |
| India                                   | 7.31  | 1.98-21.54  | 65270.5   | 17679.29-192329.22   | Global       |
| Nepal                                   | 7.31  | 1.98-21.54  | 1283.17   | 347.56-3781.04       | Global       |
| Pakistan                                | 7.31  | 1.98-21.54  | 8918.33   | 2415.64-26279.19     | Global       |
| South East Asia, east Asia, and Oceania | 9.7   | 1.45-38.91  | 156135.68 | 23366.58-626131.1    | SUPER-REGION |
| Asia, east                              | 11.56 | 2.2-35.49   | 132579.56 | 25207.82-408051.9    | REGION       |
| China                                   | 10.81 | 10.57-11.06 | 121993.8  | 119147.52-124936.05  | Country      |
| Dem. People's Republic of Korea         | 11.56 | 2.2-35.49   | 2171.77   | 413.31-6667.49       | Region       |
| Asia, South East                        | 9.7   | 1.45-38.91  | 156135.68 | 23366.58-626131.1    | REGION       |
| Cambodia                                | 9.7   | 1.45-38.91  | 978.56    | 146.28-3925.35       | Super-region |
| Indonesia                               | 9.7   | 1.45-38.91  | 17388.47  | 2599.31-69751.08     | Super-region |
| Lao People's Democratic Republic        | 9.7   | 1.45-38.91  | 411.53    | 61.52-1650.77        | Super-region |
| Malaysia                                | 9.7   | 1.45-38.91  | 2144.28   | 320.54-8601.42       | Super-region |
| Maldives                                | 9.7   | 1.45-38.91  | 39.6      | 5.92-158.86          | Super-region |
| Mauritius                               | 9.7   | 1.45-38.91  | 93.47     | 13.97-374.94         | Super-region |
| Myanmar                                 | 9.7   | 1.45-38.91  | 3440.75   | 514.34-13802.03      | Super-region |
| Philippines                             | 9.7   | 1.45-38.91  | 6420.94   | 959.83-25756.59      | Super-region |
| Seychelles                              | 9.7   | 1.45-38.91  | 6.65      | 0.99-26.67           | Super-region |
| Sri Lanka                               | 9.7   | 1.45-38.91  | 1423.61   | 212.81-5710.6        | Super-region |
| Thailand                                | 9.7   | 1.45-38.91  | 5224.33   | 780.96-20956.56      | Super-region |
| Timor-Leste                             | 9.7   | 1.45-38.91  | 65.94     | 9.86-264.53          | Super-region |
| Vietnam                                 | 9.7   | 1.45-38.91  | 6619      | 989.44-26551.06      | Super-region |
| Oceania                                 | 9.7   | 1.45-38.91  | 156135.68 | 23366.58-626131.1    | REGION       |
| Fiji                                    | 9.7   | 1.45-38.91  | 54.43     | 8.14-218.35          | Super-region |
| Guam                                    | 9.7   | 1.45-38.91  | 11.12     | 1.66-44.6            | Super-region |
| Kiribati                                | 9.7   | 1.45-38.91  | 6.44      | 0.96-25.82           | Super-region |

|                                  |      |            |          |                      |              |
|----------------------------------|------|------------|----------|----------------------|--------------|
| Marshall Islands                 | 9.7  | 1.45-38.91 | 2.68     | 0.4-10.76            | Super-region |
| Micronesia (Fed. States of)      | 9.7  | 1.45-38.91 | 6.56     | 0.98-26.33           | Super-region |
| Papua New Guinea                 | 9.7  | 1.45-38.91 | 473.24   | 70.74-1898.34        | Super-region |
| Samoa                            | 9.7  | 1.45-38.91 | 10.21    | 1.53-40.97           | Super-region |
| Solomon Islands                  | 9.7  | 1.45-38.91 | 33.16    | 4.96-133.03          | Super-region |
| Tonga                            | 9.7  | 1.45-38.91 | 5.58     | 0.83-22.39           | Super-region |
| Vanuatu                          | 9.7  | 1.45-38.91 | 15.46    | 2.31-62              | Super-region |
| Sub-Saharan Africa               | 7.31 | 1.98-21.54 | 379811.3 | 102834.15-1120152.35 | SUPER-REGION |
| Sub-Saharan Africa, central      | 7.31 | 1.98-21.54 | 379811.3 | 102834.15-1120152.35 | REGION       |
| Angola                           | 7.31 | 1.98-21.54 | 1029.63  | 278.89-3033.97       | Global       |
| Central African Republic         | 7.31 | 1.98-21.54 | 155.67   | 42.16-458.7          | Global       |
| Congo                            | 7.31 | 1.98-21.54 | 195.02   | 52.82-574.64         | Global       |
| Democratic Republic of the Congo | 7.31 | 1.98-21.54 | 2856.3   | 773.66-8416.52       | Global       |
| Equatorial Guinea                | 7.31 | 1.98-21.54 | 56       | 15.17-165            | Global       |
| Gabon                            | 7.31 | 1.98-21.54 | 87.94    | 23.82-259.12         | Global       |
| Sub-Saharan Africa, eastern      | 7.31 | 1.98-21.54 | 379811.3 | 102834.15-1120152.35 | REGION       |
| Burundi                          | 7.31 | 1.98-21.54 | 386.92   | 104.8-1140.12        | Global       |
| Comoros                          | 7.31 | 1.98-21.54 | 32.21    | 8.73-94.92           | Global       |
| Djibouti                         | 7.31 | 1.98-21.54 | 44.71    | 12.11-131.73         | Global       |
| Eritrea                          | 7.31 | 1.98-21.54 | 125.29   | 33.94-369.2          | Global       |
| Ethiopia                         | 7.31 | 1.98-21.54 | 4100.66  | 1110.71-12083.21     | Global       |
| Kenya                            | 7.31 | 1.98-21.54 | 1974.47  | 534.81-5818.06       | Global       |
| Madagascar                       | 7.31 | 1.98-21.54 | 993.07   | 268.98-2926.21       | Global       |
| Malawi                           | 7.31 | 1.98-21.54 | 638.12   | 172.84-1880.31       | Global       |
| Mozambique                       | 7.31 | 1.98-21.54 | 1019.17  | 276.06-3003.15       | Global       |
| Rwanda                           | 7.31 | 1.98-21.54 | 474.08   | 128.41-1396.95       | Global       |
| Somalia                          | 7.31 | 1.98-21.54 | 492.71   | 133.46-1451.84       | Global       |
| South Sudan                      | 7.31 | 1.98-21.54 | 392.26   | 106.25-1155.86       | Global       |
| Uganda                           | 7.31 | 1.98-21.54 | 1420.74  | 384.83-4186.43       | Global       |
| United Republic of Tanzania      | 7.31 | 1.98-21.54 | 1994.38  | 540.2-5876.73        | Global       |
| Zambia                           | 7.31 | 1.98-21.54 | 597.24   | 161.77-1759.87       | Global       |
| Sub-Saharan Africa, southern     | 7.31 | 1.98-21.54 | 379811.3 | 102834.15-1120152.35 | REGION       |
| Botswana                         | 7.31 | 1.98-21.54 | 98       | 26.54-288.76         | Global       |
| Lesotho                          | 7.31 | 1.98-21.54 | 90.25    | 24.45-265.95         | Global       |
| Namibia                          | 7.31 | 1.98-21.54 | 99.41    | 26.93-292.93         | Global       |
| South Africa                     | 7.31 | 1.98-21.54 | 2727.64  | 738.81-8037.41       | Global       |
| Eswatini                         | 7.31 | 1.98-21.54 | 43.61    | 11.81-128.49         | Global       |
| Zimbabwe                         | 7.31 | 1.98-21.54 | 511.32   | 138.5-1506.68        | Global       |
| Sub-Saharan Africa, western      | 7.31 | 1.98-21.54 | 379811.3 | 102834.15-1120152.35 | REGION       |
| Benin                            | 7.31 | 1.98-21.54 | 420.09   | 113.78-1237.84       | Global       |
| Burkina Faso                     | 7.31 | 1.98-21.54 | 681.41   | 184.57-2007.86       | Global       |
| Cote d'Ivoire                    | 7.31 | 1.98-21.54 | 915.44   | 247.96-2697.48       | Global       |
| Cameroon                         | 7.31 | 1.98-21.54 | 915.46   | 247.96-2697.53       | Global       |
| Cabo Verde                       | 7.31 | 1.98-21.54 | 25.66    | 6.95-75.6            | Global       |
| Chad                             | 7.31 | 1.98-21.54 | 506.92   | 137.3-1493.7         | Global       |
| Gambia                           | 7.31 | 1.98-21.54 | 80.23    | 21.73-236.4          | Global       |
| Ghana                            | 7.31 | 1.98-21.54 | 1198.72  | 324.69-3532.2        | Global       |
| Guinea                           | 7.31 | 1.98-21.54 | 436.24   | 118.16-1285.44       | Global       |
| Guinea-Bissau                    | 7.31 | 1.98-21.54 | 68.39    | 18.53-201.53         | Global       |
| Liberia                          | 7.31 | 1.98-21.54 | 180.11   | 48.78-530.71         | Global       |
| Mali                             | 7.31 | 1.98-21.54 | 619.96   | 167.92-1826.82       | Global       |
| Mauritania                       | 7.31 | 1.98-21.54 | 170.63   | 46.22-502.8          | Global       |
| Niger                            | 7.31 | 1.98-21.54 | 697.92   | 189.04-2056.53       | Global       |

|                       |      |            |         |                  |        |
|-----------------------|------|------------|---------|------------------|--------|
| Nigeria               | 7.31 | 1.98-21.54 | 6914.08 | 1872.76-20373.38 | Global |
| Sao Tome and Principe | 7.31 | 1.98-21.54 | 7.5     | 2.03-22.11       | Global |
| Senegal               | 7.31 | 1.98-21.54 | 573.66  | 155.38-1690.38   | Global |
| Sierra Leone          | 7.31 | 1.98-21.54 | 283.91  | 76.9-836.59      | Global |
| Togo                  | 7.31 | 1.98-21.54 | 294.12  | 79.67-866.67     | Global |

**Table S13. Estimated incidence of SLE diagnosed by physician/ dermatologist for male.**

| Country/Region/Super-region                      | Expected Prevalence | 95% Confidence Interval of Prevalence | Expected Patient Number | 95% Confidence Interval of Patient Number | Hierarchy of Region in Estimate |
|--------------------------------------------------|---------------------|---------------------------------------|-------------------------|-------------------------------------------|---------------------------------|
| Global                                           | 1.53                | 0.41-4.46                             | 60286.28                | 16288.72-175439.72                        | GLOBAL                          |
| Central Europe, eastern Europe, and central Asia | 0.99                | 0.22-2.96                             | 1969.83                 | 425.97-5752.25                            | SUPER-REGION                    |
| Asia, central                                    | 0.34                | 0.05-1.07                             | 160.03                  | 17.98-499.02                              | REGION                          |
| Armenia                                          | 0.34                | 0.05-1.07                             | 4.74                    | 0.7-14.91                                 | Region                          |
| Azerbaijan                                       | 0.34                | 0.05-1.07                             | 17.22                   | 2.53-54.19                                | Region                          |
| Georgia                                          | 0.34                | 0.05-1.07                             | 6.46                    | 0.95-20.34                                | Region                          |
| Kazakhstan                                       | 0.16                | 0.05-0.35                             | 14.54                   | 3-33                                      | Country                         |
| Kyrgyzstan                                       | 0.34                | 0.05-1.07                             | 10.97                   | 1.61-34.53                                | Region                          |
| Mongolia                                         | 0.34                | 0.05-1.07                             | 5.49                    | 0.81-17.28                                | Region                          |
| Tajikistan                                       | 0.34                | 0.05-1.07                             | 16.34                   | 2.4-51.42                                 | Region                          |
| Turkmenistan                                     | 0.34                | 0.05-1.07                             | 10.1                    | 1.48-31.77                                | Region                          |
| Uzbekistan                                       | 0.34                | 0.05-1.07                             | 56.77                   | 8.35-178.66                               | Region                          |
| Europe, central                                  | 3.99                | 0.93-9.22                             | 2208.85                 | 507.88-5185.8                             | REGION                          |
| Albania                                          | 3.99                | 0.93-9.22                             | 58.44                   | 13.62-135.05                              | Region                          |
| Bosnia and Herzegovina                           | 3.99                | 0.93-9.22                             | 64.1                    | 14.94-148.13                              | Region                          |
| Bulgaria                                         | 3.99                | 0.93-9.22                             | 134.62                  | 31.38-311.09                              | Region                          |
| Croatia                                          | 3.99                | 0.93-9.22                             | 78.97                   | 18.41-182.49                              | Region                          |
| Czechia                                          | 3.99                | 0.93-9.22                             | 210.37                  | 49.03-486.12                              | Region                          |
| Hungary                                          | 1.26                | 1.21-1.31                             | 57.96                   | 44-74                                     | Country                         |
| Montenegro                                       | 3.99                | 0.93-9.22                             | 12.39                   | 2.89-28.63                                | Region                          |
| Poland                                           | 23.72               | 23.2-24.33                            | 4351.73                 | 4186.98-4524.02                           | Country                         |
| Romania                                          | 3.99                | 0.93-9.22                             | 373.2                   | 86.99-862.39                              | Region                          |
| Serbia                                           | 3.99                | 0.93-9.22                             | 170.76                  | 39.8-394.58                               | Region                          |
| Slovakia                                         | 3.99                | 0.93-9.22                             | 106.07                  | 24.72-245.11                              | Region                          |
| Slovenia                                         | 3.99                | 0.93-9.22                             | 41.3                    | 9.63-95.45                                | Region                          |
| North Macedonia                                  | 3.99                | 0.93-9.22                             | 41.58                   | 9.69-96.08                                | Region                          |
| Europe, eastern                                  | 1.48                | 0.06-6.98                             | 386.31                  | 50-1199.45                                | REGION                          |
| Belarus                                          | 1.48                | 0.06-6.98                             | 65.11                   | 2.64-307.07                               | Region                          |
| Estonia                                          | 2                   | 0.1-12                                | 3.11                    | 0-15                                      | Country                         |
| Latvia                                           | 1.48                | 0.06-6.98                             | 12.87                   | 0.52-60.67                                | Region                          |
| Lithuania                                        | 1.48                | 0.06-6.98                             | 18.65                   | 0.76-87.94                                | Region                          |
| Republic of Moldova                              | 1.48                | 0.06-6.98                             | 28.59                   | 1.16-134.85                               | Region                          |
| Russia                                           | 1.4                 | 0.06-8.57                             | 223.94                  | 26.98-829.55                              | Country                         |
| Ukraine                                          | 0.77                | 0.02-4.46                             | 38.34                   | 3-142                                     | Country                         |
| High income                                      | 1.24                | 0.42-3.14                             | 6642.84                 | 2230.22-17079.08                          | SUPER-REGION                    |
| Asia Pacific, high income                        | 1.64                | 0.56-3.94                             | 1484.4                  | 508.72-3584.9                             | REGION                          |
| Brunei Darussalam                                | 1.64                | 0.56-3.94                             | 3.72                    | 1.27-8.94                                 | Region                          |
| Japan                                            | 1.42                | 0.97-1.94                             | 874.62                  | 607.9-1188.08                             | Country                         |
| Republic of Korea                                | 1.58                | 1.55-1.62                             | 407.08                  | 370-446.02                                | Country                         |
| Singapore                                        | 1.64                | 0.56-3.94                             | 50.22                   | 17.15-120.65                              | Region                          |
| Australasia                                      | 0.73                | 0.15-2.24                             | 109.2                   | 19.98-331.12                              | REGION                          |
| Australia                                        | 0.4                 | 0.24-0.61                             | 50.77                   | 28-79                                     | Country                         |
| New Zealand                                      | 0.73                | 0.15-2.24                             | 17.3                    | 3.55-53.09                                | Region                          |
| Europe, western                                  | 0.93                | 0.57-1.42                             | 1994.61                 | 1225.98-3019.4                            | REGION                          |
| Austria                                          | 0.93                | 0.57-1.42                             | 41.29                   | 25.31-63.04                               | Region                          |

|                                    |      |            |         |                  |              |
|------------------------------------|------|------------|---------|------------------|--------------|
| Belgium                            | 0.93 | 0.57-1.42  | 53.42   | 32.74-81.57      | Region       |
| Cyprus                             | 0.93 | 0.57-1.42  | 5.61    | 3.44-8.57        | Region       |
| Denmark                            | 0.55 | 0.52-0.57  | 15.8    | 8-24             | Country      |
| Finland                            | 0.76 | 0.6-0.94   | 20.89   | 12-32            | Country      |
| France                             | 1.4  | 1.33-1.47  | 441.18  | 393.98-488.03    | Country      |
| Germany                            | 1.17 | 1.1-1.23   | 483.8   | 432.95-537       | Country      |
| Greece                             | 1.14 | 0.91-1.39  | 58.42   | 40.98-81         | Country      |
| Iceland                            | 0.93 | 0.57-1.42  | 1.59    | 0.98-2.43        | Region       |
| Ireland                            | 0.93 | 0.57-1.42  | 22.8    | 13.97-34.81      | Region       |
| Israel                             | 0.93 | 0.57-1.42  | 40.06   | 24.55-61.17      | Region       |
| Italy                              | 0.49 | 0.32-0.71  | 145.26  | 86-209           | Country      |
| Luxembourg                         | 0.93 | 0.57-1.42  | 2.94    | 1.8-4.5          | Region       |
| Malta                              | 0.46 | 0.21-0.83  | 1.02    | 0-3.02           | Country      |
| Netherlands                        | 1.77 | 0.78-3.22  | 150.97  | 61-275.05        | Country      |
| Norway                             | 0.51 | 0.31-0.75  | 13.97   | 6-25             | Country      |
| Portugal                           | 0.93 | 0.57-1.42  | 44.86   | 27.49-68.5       | Region       |
| Spain                              | 1.19 | 0.89-1.51  | 274.12  | 198.98-354.02    | Country      |
| Sweden                             | 1.6  | 1.38-1.85  | 80.98   | 60-102.02        | Country      |
| Switzerland                        | 0.93 | 0.57-1.42  | 39.93   | 24.47-60.97      | Region       |
| United Kingdom                     | 1.19 | 1.14-1.23  | 399.65  | 358-441.02       | Country      |
| Latin America, southern            | 0.8  | 0.18-2.26  | 265.71  | 60-743.07        | REGION       |
| Argentina                          | 0.52 | 0.35-0.73  | 114.2   | 75-160.02        | Country      |
| Chile                              | 0.8  | 0.18-2.26  | 75.4    | 16.96-213        | Region       |
| Uruguay                            | 0.8  | 0.18-2.26  | 13.43   | 3.02-37.93       | Region       |
| North America, high income         | 1.91 | 0.59-4.56  | 3487.3  | 1081.73-8313     | REGION       |
| Canada                             | 1.09 | 1.01-1.18  | 203.51  | 171-232          | Country      |
| United States of America           | 3.58 | 3.51-3.66  | 5864.09 | 5670.95-6066.08  | Country      |
| Latin America and Caribbean        | 1.89 | 0.4-7.41   | 5447.77 | 1142.77-21268.95 | SUPER-REGION |
| Caribbean                          | 2.31 | 0.52-7.73  | 473.84  | 112.92-1392.57   | REGION       |
| Antigua and Barbuda                | 2.31 | 0.52-7.73  | 1.09    | 0.25-3.65        | Region       |
| Bahamas                            | 2.31 | 0.52-7.73  | 4.41    | 0.99-14.77       | Region       |
| Barbados                           | 2.99 | 0.58-10.56 | 3.23    | 0-7              | Country      |
| Belize                             | 2.31 | 0.52-7.73  | 4.57    | 1.03-15.29       | Region       |
| Cuba                               | 2.31 | 0.52-7.73  | 129.87  | 29.24-434.6      | Region       |
| Dominican Republic                 | 2.31 | 0.52-7.73  | 125.14  | 28.17-418.75     | Region       |
| Grenada                            | 2.31 | 0.52-7.73  | 1.31    | 0.29-4.38        | Region       |
| Guyana                             | 2.31 | 0.52-7.73  | 9.14    | 2.06-30.57       | Region       |
| Haiti                              | 2.31 | 0.52-7.73  | 129.97  | 29.26-434.92     | Region       |
| Jamaica                            | 2.31 | 0.52-7.73  | 33.95   | 7.64-113.59      | Region       |
| Puerto Rico                        | 2.31 | 0.52-7.73  | 31.3    | 7.05-104.75      | Region       |
| Saint Lucia                        | 2.31 | 0.52-7.73  | 2.09    | 0.47-6.99        | Region       |
| Saint Vincent and the Grenadines   | 2.31 | 0.52-7.73  | 1.3     | 0.29-4.35        | Region       |
| Suriname                           | 2.31 | 0.52-7.73  | 6.81    | 1.53-22.79       | Region       |
| Trinidad and Tobago                | 2.31 | 0.52-7.73  | 15.96   | 3.59-53.41       | Region       |
| Virgin Island (US)                 | 2.31 | 0.52-7.73  | 1.15    | 0.26-3.83        | Region       |
| Latin America, Andean              | 1.89 | 0.4-7.41   | 5447.77 | 1142.77-21268.95 | REGION       |
| Bolivia                            | 1.89 | 0.4-7.41   | 110.71  | 23.43-434.04     | Super-region |
| Ecuador                            | 1.89 | 0.4-7.41   | 166.76  | 35.29-653.82     | Super-region |
| Peru                               | 1.89 | 0.4-7.41   | 309.55  | 65.51-1213.63    | Super-region |
| Latin America, central             | 1.89 | 0.4-7.41   | 5447.77 | 1142.77-21268.95 | REGION       |
| Colombia                           | 1.89 | 0.4-7.41   | 472.18  | 99.93-1851.26    | Super-region |
| Costa Rica                         | 1.89 | 0.4-7.41   | 48.1    | 10.18-188.58     | Super-region |
| El Salvador                        | 1.89 | 0.4-7.41   | 57.39   | 12.15-225        | Super-region |
| Guatemala                          | 1.89 | 0.4-7.41   | 166.83  | 35.31-654.08     | Super-region |
| Honduras                           | 1.89 | 0.4-7.41   | 93.53   | 19.79-366.7      | Super-region |
| Mexico                             | 1.89 | 0.4-7.41   | 1191.96 | 252.27-4673.25   | Super-region |
| Nicaragua                          | 1.89 | 0.4-7.41   | 61.7    | 13.06-241.92     | Super-region |
| Panama                             | 1.89 | 0.4-7.41   | 40.81   | 8.64-160.01      | Super-region |
| Venezuela (Bolivarian Republic of) | 1.89 | 0.4-7.41   | 264.3   | 55.94-1036.22    | Super-region |

|                                                |      |           |          |                    |              |
|------------------------------------------------|------|-----------|----------|--------------------|--------------|
| <b>Latin America, tropical</b>                 | 2.55 | 0.54-8.82 | 2755.12  | 571.95-9460.52     | REGION       |
| <b>Brazil</b>                                  | 2.33 | 1.79-2.93 | 2437.62  | 1870.75-3060.5     | Country      |
| <b>Paraguay</b>                                | 2.55 | 0.54-8.82 | 92.42    | 19.57-319.66       | Region       |
| <b>North Africa and Middle East</b>            | 1.85 | 0.32-6.84 | 5887.27  | 1015.85-21623.17   | SUPER-REGION |
| <b>North Africa and the Middle East</b>        | 2.21 | 0.66-5.54 | 7060.77  | 2076.38-17692.17   | REGION       |
| <b>Afghanistan</b>                             | 2.21 | 0.66-5.54 | 441.48   | 131.84-1106.68     | Region       |
| <b>Algeria</b>                                 | 2.21 | 0.66-5.54 | 489.59   | 146.21-1227.29     | Region       |
| <b>Bahrain</b>                                 | 2.21 | 0.66-5.54 | 24.32    | 7.26-60.97         | Region       |
| <b>Egypt</b>                                   | 2.21 | 0.66-5.54 | 1142.63  | 341.24-2864.33     | Region       |
| <b>Iran (Islamic Republic of)</b>              | 2.21 | 0.66-5.54 | 937.22   | 279.89-2349.41     | Region       |
| <b>Iraq</b>                                    | 2.21 | 0.66-5.54 | 449.91   | 134.36-1127.82     | Region       |
| <b>Jordan</b>                                  | 2.21 | 0.66-5.54 | 114.17   | 34.1-286.19        | Region       |
| <b>Kuwait</b>                                  | 2.21 | 0.66-5.54 | 57.78    | 17.26-144.84       | Region       |
| <b>Lebanon</b>                                 | 2.21 | 0.66-5.54 | 75.93    | 22.68-190.34       | Region       |
| <b>Libya</b>                                   | 2.21 | 0.66-5.54 | 76.66    | 22.89-192.17       | Region       |
| <b>Morocco</b>                                 | 2.21 | 0.66-5.54 | 404.8    | 120.89-1014.75     | Region       |
| <b>Palestine</b>                               | 2.21 | 0.66-5.54 | 57.17    | 17.07-143.32       | Region       |
| <b>Oman</b>                                    | 2.21 | 0.66-5.54 | 74.48    | 22.24-186.71       | Region       |
| <b>Qatar</b>                                   | 2.21 | 0.66-5.54 | 47.85    | 14.29-119.95       | Region       |
| <b>Saudi Arabia</b>                            | 2.21 | 0.66-5.54 | 444.9    | 132.87-1115.27     | Region       |
| <b>Sudan</b>                                   | 2.21 | 0.66-5.54 | 484.15   | 144.59-1213.66     | Region       |
| <b>Syrian Arab Republic</b>                    | 2.21 | 0.66-5.54 | 193.6    | 57.82-485.31       | Region       |
| <b>Sudan</b>                                   | 2.21 | 0.66-5.54 | 484.15   | 144.59-1213.66     | Region       |
| <b>Tunisia</b>                                 | 2.21 | 0.66-5.54 | 129.52   | 38.68-324.68       | Region       |
| <b>Turkey</b>                                  | 1.81 | 1.22-2.48 | 753.39   | 498.92-1031.12     | Country      |
| <b>United Arab Emirates</b>                    | 3.96 | 1.96-6.58 | 270.34   | 118.98-462         | Country      |
| <b>Yemen</b>                                   | 2.21 | 0.66-5.54 | 332.05   | 99.16-832.38       | Region       |
| <b>South Asia</b>                              | 1.53 | 0.41-4.46 | 60286.28 | 16288.72-175439.72 | SUPER-REGION |
| <b>Asia, south</b>                             | 1.53 | 0.41-4.46 | 60286.28 | 16288.72-175439.72 | REGION       |
| <b>Bangladesh</b>                              | 1.53 | 0.41-4.46 | 1273.83  | 341.35-3713.27     | Global       |
| <b>Bhutan</b>                                  | 1.53 | 0.41-4.46 | 6.27     | 1.68-18.29         | Global       |
| <b>India</b>                                   | 1.53 | 0.41-4.46 | 10971.38 | 2940.04-31981.93   | Global       |
| <b>Nepal</b>                                   | 1.53 | 0.41-4.46 | 204.23   | 54.73-595.34       | Global       |
| <b>Pakistan</b>                                | 1.53 | 0.41-4.46 | 1739.17  | 466.05-5069.75     | Global       |
| <b>South East Asia, east Asia, and Oceania</b> | 2.22 | 0.33-8.93 | 24711.14 | 3626.68-99713.02   | SUPER-REGION |
| <b>Asia, east</b>                              | 2.76 | 0.52-8.46 | 21136.5  | 3986.7-65012.22    | REGION       |
| <b>China</b>                                   | 2.58 | 2.51-2.65 | 19458.48 | 18875.93-20058.03  | Country      |
| <b>Dem. People's Republic of Korea</b>         | 2.76 | 0.52-8.46 | 347.99   | 65.56-1066.67      | Region       |
| <b>Asia, South East</b>                        | 2.22 | 0.33-8.93 | 24711.14 | 3626.68-99713.02   | REGION       |
| <b>Cambodia</b>                                | 2.22 | 0.33-8.93 | 181.21   | 26.94-728.9        | Super-region |
| <b>Indonesia</b>                               | 2.22 | 0.33-8.93 | 3057.33  | 454.47-12298.17    | Super-region |
| <b>Lao People's Democratic Republic</b>        | 2.22 | 0.33-8.93 | 81.07    | 12.05-326.1        | Super-region |
| <b>Malaysia</b>                                | 2.22 | 0.33-8.93 | 369.18   | 54.88-1485.05      | Super-region |
| <b>Maldives</b>                                | 2.22 | 0.33-8.93 | 7.61     | 1.13-30.62         | Super-region |
| <b>Mauritius</b>                               | 2.22 | 0.33-8.93 | 13.93    | 2.07-56.03         | Super-region |
| <b>Myanmar</b>                                 | 2.22 | 0.33-8.93 | 582.09   | 86.53-2341.46      | Super-region |
| <b>Philippines</b>                             | 2.22 | 0.33-8.93 | 1221.64  | 181.59-4914.05     | Super-region |
| <b>Seychelles</b>                              | 2.22 | 0.33-8.93 | 1.12     | 0.17-4.5           | Super-region |
| <b>Sri Lanka</b>                               | 2.22 | 0.33-8.93 | 227.93   | 33.88-916.84       | Super-region |
| <b>Thailand</b>                                | 2.22 | 0.33-8.93 | 753.99   | 112.08-3032.93     | Super-region |
| <b>Timor-Leste</b>                             | 2.22 | 0.33-8.93 | 14.79    | 2.2-59.5           | Super-region |
| <b>Vietnam</b>                                 | 2.22 | 0.33-8.93 | 1078.75  | 160.36-4339.31     | Super-region |
| <b>Oceania</b>                                 | 2.22 | 0.33-8.93 | 24711.14 | 3626.68-99713.02   | REGION       |
| <b>Fiji</b>                                    | 2.22 | 0.33-8.93 | 10.08    | 1.5-40.54          | Super-region |
| <b>Guam</b>                                    | 2.22 | 0.33-8.93 | 1.89     | 0.28-7.6           | Super-region |
| <b>Kiribati</b>                                | 2.22 | 0.33-8.93 | 1.3      | 0.19-5.25          | Super-region |

|                                         |      |           |          |                    |              |
|-----------------------------------------|------|-----------|----------|--------------------|--------------|
| <b>Marshall Islands</b>                 | 2.22 | 0.33-8.93 | 0.63     | 0.09-2.55          | Super-region |
| <b>Micronesia (Fed. States of)</b>      | 2.22 | 0.33-8.93 | 1.3      | 0.19-5.22          | Super-region |
| <b>Papua New Guinea</b>                 | 2.22 | 0.33-8.93 | 101.41   | 15.07-407.93       | Super-region |
| <b>Samoa</b>                            | 2.22 | 0.33-8.93 | 2.28     | 0.34-9.17          | Super-region |
| <b>Solomon Islands</b>                  | 2.22 | 0.33-8.93 | 7.75     | 1.15-31.19         | Super-region |
| <b>Tonga</b>                            | 2.22 | 0.33-8.93 | 1.17     | 0.17-4.72          | Super-region |
| <b>Vanuatu</b>                          | 2.22 | 0.33-8.93 | 3.46     | 0.51-13.9          | Super-region |
| <b>Sub-Saharan Africa</b>               | 1.53 | 0.41-4.46 | 60286.28 | 16288.72-175439.72 | SUPER-REGION |
| <b>Sub-Saharan Africa, central</b>      | 1.53 | 0.41-4.46 | 60286.28 | 16288.72-175439.72 | REGION       |
| <b>Angola</b>                           | 1.53 | 0.41-4.46 | 248.79   | 66.67-725.23       | Global       |
| <b>Central African Republic</b>         | 1.53 | 0.41-4.46 | 36.63    | 9.82-106.77        | Global       |
| <b>Congo</b>                            | 1.53 | 0.41-4.46 | 42.18    | 11.3-122.95        | Global       |
| <b>Democratic Republic of the Congo</b> | 1.53 | 0.41-4.46 | 684.07   | 183.31-1994.07     | Global       |
| <b>Equatorial Guinea</b>                | 1.53 | 0.41-4.46 | 11.94    | 3.2-34.8           | Global       |
| <b>Gabon</b>                            | 1.53 | 0.41-4.46 | 17.33    | 4.64-50.53         | Global       |
| <b>Sub-Saharan Africa, eastern</b>      | 1.53 | 0.41-4.46 | 60286.28 | 16288.72-175439.72 | REGION       |
| <b>Burundi</b>                          | 1.53 | 0.41-4.46 | 90.27    | 24.19-263.13       | Global       |
| <b>Comoros</b>                          | 1.53 | 0.41-4.46 | 6.71     | 1.8-19.56          | Global       |
| <b>Djibouti</b>                         | 1.53 | 0.41-4.46 | 7.94     | 2.13-23.15         | Global       |
| <b>Eritrea</b>                          | 1.53 | 0.41-4.46 | 27.2     | 7.29-79.28         | Global       |
| <b>Ethiopia</b>                         | 1.53 | 0.41-4.46 | 880      | 235.82-2565.24     | Global       |
| <b>Kenya</b>                            | 1.53 | 0.41-4.46 | 408.79   | 109.55-1191.65     | Global       |
| <b>Madagascar</b>                       | 1.53 | 0.41-4.46 | 211.36   | 56.64-616.13       | Global       |
| <b>Malawi</b>                           | 1.53 | 0.41-4.46 | 144.34   | 38.68-420.76       | Global       |
| <b>Mozambique</b>                       | 1.53 | 0.41-4.46 | 232.38   | 62.27-677.4        | Global       |
| <b>Rwanda</b>                           | 1.53 | 0.41-4.46 | 97.42    | 26.11-283.99       | Global       |
| <b>Somalia</b>                          | 1.53 | 0.41-4.46 | 121.24   | 32.49-353.41       | Global       |
| <b>South Sudan</b>                      | 1.53 | 0.41-4.46 | 85.73    | 22.97-249.89       | Global       |
| <b>Uganda</b>                           | 1.53 | 0.41-4.46 | 344.96   | 92.44-1005.58      | Global       |
| <b>United Republic of Tanzania</b>      | 1.53 | 0.41-4.46 | 456.72   | 122.39-1331.36     | Global       |
| <b>Zambia</b>                           | 1.53 | 0.41-4.46 | 139.28   | 37.32-405.99       | Global       |
| <b>Sub-Saharan Africa, southern</b>     | 1.53 | 0.41-4.46 | 60286.28 | 16288.72-175439.72 | REGION       |
| <b>Botswana</b>                         | 1.53 | 0.41-4.46 | 17.43    | 4.67-50.8          | Global       |
| <b>Lesotho</b>                          | 1.53 | 0.41-4.46 | 16.17    | 4.33-47.14         | Global       |
| <b>Namibia</b>                          | 1.53 | 0.41-4.46 | 18.84    | 5.05-54.93         | Global       |
| <b>South Africa</b>                     | 1.53 | 0.41-4.46 | 447      | 119.79-1303.03     | Global       |
| <b>Eswatini</b>                         | 1.53 | 0.41-4.46 | 8.72     | 2.34-25.43         | Global       |
| <b>Zimbabwe</b>                         | 1.53 | 0.41-4.46 | 108.51   | 29.08-316.3        | Global       |
| <b>Sub-Saharan Africa, western</b>      | 1.53 | 0.41-4.46 | 60286.28 | 16288.72-175439.72 | REGION       |
| <b>Benin</b>                            | 1.53 | 0.41-4.46 | 92.63    | 24.82-270.02       | Global       |
| <b>Burkina Faso</b>                     | 1.53 | 0.41-4.46 | 159.8    | 42.82-465.83       | Global       |
| <b>Cote d'Ivoire</b>                    | 1.53 | 0.41-4.46 | 203.5    | 54.53-593.2        | Global       |
| <b>Cameroon</b>                         | 1.53 | 0.41-4.46 | 203.14   | 54.44-592.16       | Global       |
| <b>Cabo Verde</b>                       | 1.53 | 0.41-4.46 | 4.27     | 1.14-12.45         | Global       |
| <b>Chad</b>                             | 1.53 | 0.41-4.46 | 125.46   | 33.62-365.73       | Global       |
| <b>Gambia</b>                           | 1.53 | 0.41-4.46 | 18.34    | 4.91-53.45         | Global       |
| <b>Ghana</b>                            | 1.53 | 0.41-4.46 | 240.97   | 64.57-702.45       | Global       |
| <b>Guinea</b>                           | 1.53 | 0.41-4.46 | 97.2     | 26.05-283.35       | Global       |
| <b>Guinea-Bissau</b>                    | 1.53 | 0.41-4.46 | 14.73    | 3.95-42.94         | Global       |
| <b>Liberia</b>                          | 1.53 | 0.41-4.46 | 38.9     | 10.42-113.4        | Global       |
| <b>Mali</b>                             | 1.53 | 0.41-4.46 | 155.22   | 41.6-452.47        | Global       |
| <b>Mauritania</b>                       | 1.53 | 0.41-4.46 | 35.73    | 9.57-104.14        | Global       |
| <b>Niger</b>                            | 1.53 | 0.41-4.46 | 186.2    | 49.9-542.79        | Global       |
| <b>Nigeria</b>                          | 1.53 | 0.41-4.46 | 1598.39  | 428.33-4659.35     | Global       |

|                       |      |           |        |              |        |
|-----------------------|------|-----------|--------|--------------|--------|
| Sao Tome and Principe | 1.53 | 0.41-4.46 | 1.68   | 0.45-4.89    | Global |
| Senegal               | 1.53 | 0.41-4.46 | 125.01 | 33.5-364.42  | Global |
| Sierra Leone          | 1.53 | 0.41-4.46 | 60.91  | 16.32-177.56 | Global |
| Togo                  | 1.53 | 0.41-4.46 | 63.03  | 16.89-183.73 | Global |

**Table S14. Estimated incidence of SLE diagnosed by physician/ dermatologist for female.**

| Country/Region/Super-region                      | Expected Prevalence | 95% Confidence Interval of Prevalence | Expected Patient Number | 95% Confidence Interval of Patient Number | Hierarchy of Region in Estimate |
|--------------------------------------------------|---------------------|---------------------------------------|-------------------------|-------------------------------------------|---------------------------------|
| Global                                           | 8.82                | 2.4-25.99                             | 340649                  | 92606.03-1004738.97                       | GLOBAL                          |
| Central Europe, eastern Europe, and central Asia | 5.8                 | 1.25-17.41                            | 12671.72                | 2841.07-37582.45                          | SUPER-REGION                    |
| Asia, central                                    | 2                   | 0.27-6.22                             | 956.99                  | 117-2948.75                               | REGION                          |
| Armenia                                          | 2                   | 0.27-6.22                             | 31.39                   | 4.24-97.61                                | Region                          |
| Azerbaijan                                       | 2                   | 0.27-6.22                             | 101.49                  | 13.7-315.63                               | Region                          |
| Georgia                                          | 2                   | 0.27-6.22                             | 41.76                   | 5.64-129.86                               | Region                          |
| Kazakhstan                                       | 0.95                | 0.28-2.07                             | 92.29                   | 23-196.1                                  | Country                         |
| Kyrgyzstan                                       | 2                   | 0.27-6.22                             | 65.94                   | 8.9-205.07                                | Region                          |
| Mongolia                                         | 2                   | 0.27-6.22                             | 33.26                   | 4.49-103.45                               | Region                          |
| Tajikistan                                       | 2                   | 0.27-6.22                             | 94.64                   | 12.78-294.32                              | Region                          |
| Turkmenistan                                     | 2                   | 0.27-6.22                             | 61.24                   | 8.27-190.45                               | Region                          |
| Uzbekistan                                       | 2                   | 0.27-6.22                             | 335.44                  | 45.28-1043.21                             | Region                          |
| Europe, central                                  | 22.99               | 5.35-53.28                            | 13409.98                | 3097.95-31311.42                          | REGION                          |
| Albania                                          | 22.99               | 5.35-53.28                            | 324.86                  | 75.6-752.87                               | Region                          |
| Bosnia and Herzegovina                           | 22.99               | 5.35-53.28                            | 384.87                  | 89.56-891.95                              | Region                          |
| Bulgaria                                         | 22.99               | 5.35-53.28                            | 821.71                  | 191.22-1904.34                            | Region                          |
| Croatia                                          | 22.99               | 5.35-53.28                            | 488.72                  | 113.73-1132.62                            | Region                          |
| Czechia                                          | 22.99               | 5.35-53.28                            | 1249.77                 | 290.83-2896.38                            | Region                          |
| Hungary                                          | 7.31                | 7.07-7.57                             | 370.43                  | 330-409.02                                | Country                         |
| Montenegro                                       | 22.99               | 5.35-53.28                            | 72.99                   | 16.99-169.16                              | Region                          |
| Poland                                           | 136.48              | 133.89-139.31                         | 26624.01                | 26039.77-27256.27                         | Country                         |
| Romania                                          | 22.99               | 5.35-53.28                            | 2272.12                 | 528.75-5265.71                            | Region                          |
| Serbia                                           | 22.99               | 5.35-53.28                            | 1024.81                 | 238.48-2375.03                            | Region                          |
| Slovakia                                         | 22.99               | 5.35-53.28                            | 643.96                  | 149.86-1492.41                            | Region                          |
| Slovenia                                         | 22.99               | 5.35-53.28                            | 239.91                  | 55.83-556                                 | Region                          |
| North Macedonia                                  | 22.99               | 5.35-53.28                            | 239.38                  | 55.71-554.77                              | Region                          |
| Europe, eastern                                  | 8.77                | 0.37-41.38                            | 2647.17                 | 338-8284.1                                | REGION                          |
| Belarus                                          | 8.77                | 0.37-41.38                            | 442.85                  | 18.68-2089.52                             | Region                          |
| Estonia                                          | 11.69               | 0.59-69.81                            | 20.08                   | 1.98-79.02                                | Country                         |
| Latvia                                           | 8.77                | 0.37-41.38                            | 89.14                   | 3.76-420.58                               | Region                          |
| Lithuania                                        | 8.77                | 0.37-41.38                            | 128.2                   | 5.41-604.9                                | Region                          |
| Republic of Moldova                              | 8.77                | 0.37-41.38                            | 184.34                  | 7.78-869.78                               | Region                          |
| Russia                                           | 8.29                | 0.38-51.33                            | 1544                    | 186.88-5500.57                            | Country                         |
| Ukraine                                          | 4.55                | 0.15-26.22                            | 261.37                  | 26-1029.2                                 | Country                         |
| High income                                      | 7.12                | 2.42-18.01                            | 39175.81                | 13550.13-98875.6                          | SUPER-REGION                    |
| Asia Pacific, high income                        | 9.35                | 3.2-22.64                             | 8716.75                 | 2955.7-21154.22                           | REGION                          |
| Brunei Darussalam                                | 9.35                | 3.2-22.64                             | 19.68                   | 6.74-47.66                                | Region                          |
| Japan                                            | 8.11                | 5.64-11.07                            | 5244.8                  | 3596.78-7101.42                           | Country                         |
| Republic of Korea                                | 9.02                | 8.85-9.19                             | 2311.73                 | 2212.98-2417.02                           | Country                         |
| Singapore                                        | 9.35                | 3.2-22.64                             | 260.63                  | 89.2-631.09                               | Region                          |
| Australasia                                      | 4.16                | 0.87-12.82                            | 635.11                  | 125.93-1928.42                            | REGION                          |
| Australia                                        | 2.28                | 1.36-3.49                             | 291.36                  | 169.98-451.07                             | Country                         |
| New Zealand                                      | 4.16                | 0.87-12.82                            | 101.98                  | 21.33-314.29                              | Region                          |
| Europe, western                                  | 5.36                | 3.3-8.14                              | 11838.04                | 7311.05-17975.25                          | REGION                          |
| Austria                                          | 5.36                | 3.3-8.14                              | 244.72                  | 150.67-371.65                             | Region                          |
| Belgium                                          | 5.36                | 3.3-8.14                              | 313.22                  | 192.84-475.68                             | Region                          |



|                                  |       |             |          |                   |              |
|----------------------------------|-------|-------------|----------|-------------------|--------------|
| Cyprus                           | 5.36  | 3.3-8.14    | 32.36    | 19.92-49.15       | Region       |
| Denmark                          | 3.12  | 2.97-3.27   | 90.76    | 71.97-111         | Country      |
| Finland                          | 4.36  | 3.4-5.36    | 122.29   | 89.97-158         | Country      |
| France                           | 8.09  | 7.72-8.47   | 2723.77  | 2566.98-2897.05   | Country      |
| Germany                          | 6.69  | 6.33-7.07   | 2837.21  | 2654.98-3026.12   | Country      |
| Greece                           | 6.54  | 5.23-8.06   | 347.22   | 271-437.02        | Country      |
| Iceland                          | 5.36  | 3.3-8.14    | 9.1      | 5.6-13.82         | Region       |
| Ireland                          | 5.36  | 3.3-8.14    | 133.25   | 82.04-202.35      | Region       |
| Israel                           | 5.36  | 3.3-8.14    | 232.98   | 143.44-353.82     | Region       |
| Italy                            | 2.84  | 1.81-4.1    | 880.46   | 564-1283.02       | Country      |
| Luxembourg                       | 5.36  | 3.3-8.14    | 16.58    | 10.21-25.18       | Region       |
| Malta                            | 2.61  | 1.21-4.69   | 5.73     | 1-13              | Country      |
| Netherlands                      | 10.09 | 4.4-18.36   | 868      | 381.8-1573.15     | Country      |
| Norway                           | 2.88  | 1.77-4.22   | 77.38    | 44.97-119.02      | Country      |
| Portugal                         | 5.36  | 3.3-8.14    | 287.89   | 177.25-437.21     | Region       |
| Spain                            | 6.85  | 5.14-8.74   | 1629.82  | 1210.92-2085.3    | Country      |
| Sweden                           | 9.11  | 7.82-10.56  | 459.63   | 388-551.07        | Country      |
| Switzerland                      | 5.36  | 3.3-8.14    | 233.67   | 143.87-354.87     | Region       |
| United Kingdom                   | 6.82  | 6.58-7.05   | 2342.33  | 2221.85-2467.12   | Country      |
| Latin America, southern          | 4.66  | 1.04-13.09  | 1614.75  | 353.9-4544.95     | REGION       |
| Argentina                        | 3.02  | 2.05-4.26   | 698.69   | 467.95-1009.12    | Country      |
| Chile                            | 4.66  | 1.04-13.09  | 451.44   | 100.75-1268.11    | Region       |
| Uruguay                          | 4.66  | 1.04-13.09  | 83.57    | 18.65-234.76      | Region       |
| North America, high income       | 10.94 | 3.39-25.88  | 20362.53 | 6295.95-48181.98  | REGION       |
| Canada                           | 6.2   | 5.75-6.69   | 1179.51  | 1065.92-1296.05   | Country      |
| United States of America         | 20.51 | 20.17-20.87 | 34284.38 | 33609.47-34958.03 | Country      |
| Latin America and Caribbean      | 10.97 | 2.34-42.69  | 32546.65 | 6943.3-126392.7   | SUPER-REGION |
| Caribbean                        | 13.33 | 3.02-44.27  | 2793.05  | 668.92-8278.15    | REGION       |
| Antigua and Barbuda              | 13.33 | 3.02-44.27  | 6.75     | 1.53-22.43        | Region       |
| Bahamas                          | 13.33 | 3.02-44.27  | 26.95    | 6.1-89.49         | Region       |
| Barbados                         | 17.3  | 3.35-60.74  | 19.94    | 11-30             | Country      |
| Belize                           | 13.33 | 3.02-44.27  | 26.64    | 6.04-88.48        | Region       |
| Cuba                             | 13.33 | 3.02-44.27  | 759.97   | 172.18-2523.92    | Region       |
| Dominican Republic               | 13.33 | 3.02-44.27  | 723.58   | 163.93-2403.08    | Region       |
| Grenada                          | 13.33 | 3.02-44.27  | 7.44     | 1.69-24.73        | Region       |
| Guyana                           | 13.33 | 3.02-44.27  | 52.11    | 11.81-173.07      | Region       |
| Haiti                            | 13.33 | 3.02-44.27  | 769.92   | 174.43-2556.97    | Region       |
| Jamaica                          | 13.33 | 3.02-44.27  | 198.81   | 45.04-660.26      | Region       |
| Puerto Rico                      | 13.33 | 3.02-44.27  | 200.5    | 45.42-665.86      | Region       |
| Saint Lucia                      | 13.33 | 3.02-44.27  | 12.42    | 2.81-41.26        | Region       |
| Saint Vincent and the Grenadines | 13.33 | 3.02-44.27  | 7.29     | 1.65-24.23        | Region       |
| Suriname                         | 13.33 | 3.02-44.27  | 38.9     | 8.81-129.18       | Region       |
| Trinidad and Tobago              | 13.33 | 3.02-44.27  | 94.44    | 21.4-313.65       | Region       |
| Virgin Island (US)               | 13.33 | 3.02-44.27  | 7.31     | 1.66-24.27        | Region       |
| Latin America, Andean            | 10.97 | 2.34-42.69  | 32546.65 | 6943.3-126392.7   | REGION       |
| Bolivia                          | 10.97 | 2.34-42.69  | 637.79   | 136.05-2481.98    | Super-region |
| Ecuador                          | 10.97 | 2.34-42.69  | 967.24   | 206.32-3764.02    | Super-region |
| Peru                             | 10.97 | 2.34-42.69  | 1820.16  | 388.26-7083.19    | Super-region |
| Latin America, central           | 10.97 | 2.34-42.69  | 32546.65 | 6943.3-126392.7   | REGION       |
| Colombia                         | 10.97 | 2.34-42.69  | 2840.75  | 605.96-11054.86   | Super-region |
| Costa Rica                       | 10.97 | 2.34-42.69  | 279.58   | 59.64-1088        | Super-region |
| El Salvador                      | 10.97 | 2.34-42.69  | 378.42   | 80.72-1472.63     | Super-region |
| Guatemala                        | 10.97 | 2.34-42.69  | 996.97   | 212.66-3879.73    | Super-region |
| Honduras                         | 10.97 | 2.34-42.69  | 543.61   | 115.96-2115.46    | Super-region |
| Mexico                           | 10.97 | 2.34-42.69  | 7224.08  | 1540.96-28112.66  | Super-region |
| Nicaragua                        | 10.97 | 2.34-42.69  | 368.53   | 78.61-1434.13     | Super-region |
| Panama                           | 10.97 | 2.34-42.69  | 236.32   | 50.41-919.65      | Super-region |

|                                         |       |             |           |                     |              |
|-----------------------------------------|-------|-------------|-----------|---------------------|--------------|
| Venezuela (Bolivarian Republic of)      | 10.97 | 2.34-42.69  | 1585.05   | 338.1-6168.25       | Super-region |
| Latin America, tropical                 | 14.7  | 3.15-50.48  | 16419.13  | 3483.85-56815.92    | REGION       |
| Brazil                                  | 13.47 | 10.37-16.93 | 14564.37  | 11170.77-18368.6    | Country      |
| Paraguay                                | 14.7  | 3.15-50.48  | 515.67    | 110.5-1770.81       | Region       |
| North Africa and Middle East            | 10.35 | 1.81-38.24  | 31270.44  | 5444.82-115130.22   | SUPER-REGION |
| North Africa and the Middle East        | 12.42 | 3.69-31.02  | 37532.96  | 11190.72-94006.47   | REGION       |
| Afghanistan                             | 12.42 | 3.69-31.02  | 2353.84   | 699.33-5878.93      | Region       |
| Algeria                                 | 12.42 | 3.69-31.02  | 2694.74   | 800.61-6730.34      | Region       |
| Bahrain                                 | 12.42 | 3.69-31.02  | 74.66     | 22.18-186.46        | Region       |
| Egypt                                   | 12.42 | 3.69-31.02  | 6288.34   | 1868.27-15705.66    | Region       |
| Iran (Islamic Republic of)              | 12.42 | 3.69-31.02  | 5164.77   | 1534.46-12899.44    | Region       |
| Iraq                                    | 12.42 | 3.69-31.02  | 2467.18   | 733-6162            | Region       |
| Jordan                                  | 12.42 | 3.69-31.02  | 625.61    | 185.87-1562.52      | Region       |
| Kuwait                                  | 12.42 | 3.69-31.02  | 205.69    | 61.11-513.73        | Region       |
| Lebanon                                 | 12.42 | 3.69-31.02  | 420.98    | 125.08-1051.45      | Region       |
| Libya                                   | 12.42 | 3.69-31.02  | 422.59    | 125.55-1055.46      | Region       |
| Morocco                                 | 12.42 | 3.69-31.02  | 2309.33   | 686.1-5767.74       | Region       |
| Palestine                               | 12.42 | 3.69-31.02  | 312.29    | 92.78-779.98        | Region       |
| Oman                                    | 12.42 | 3.69-31.02  | 215.64    | 64.07-538.57        | Region       |
| Qatar                                   | 12.42 | 3.69-31.02  | 88.91     | 26.42-222.06        | Region       |
| Saudi Arabia                            | 12.42 | 3.69-31.02  | 1823.55   | 541.78-4554.46      | Region       |
| Sudan                                   | 12.42 | 3.69-31.02  | 2725.17   | 809.65-6806.35      | Region       |
| Syrian Arab Republic                    | 12.42 | 3.69-31.02  | 1085.57   | 322.52-2711.29      | Region       |
| Sudan                                   | 12.42 | 3.69-31.02  | 2725.17   | 809.65-6806.35      | Region       |
| Tunisia                                 | 12.42 | 3.69-31.02  | 739.94    | 219.84-1848.07      | Region       |
| Turkey                                  | 10.46 | 7.05-14.26  | 4470.04   | 2996.17-6049.15     | Country      |
| United Arab Emirates                    | 18.72 | 9.25-31.19  | 572.84    | 277.83-982.07       | Country      |
| Yemen                                   | 12.42 | 3.69-31.02  | 1838.28   | 546.15-4591.25      | Region       |
| South Asia                              | 8.82  | 2.4-25.99   | 340649    | 92606.03-1004738.97 | SUPER-REGION |
| Asia, south                             | 8.82  | 2.4-25.99   | 340649    | 92606.03-1004738.97 | REGION       |
| Bangladesh                              | 8.82  | 2.4-25.99   | 7181.81   | 1954.23-21162.74    | Global       |
| Bhutan                                  | 8.82  | 2.4-25.99   | 31.88     | 8.68-93.95          | Global       |
| India                                   | 8.82  | 2.4-25.99   | 58465.37  | 15908.95-172280.62  | Global       |
| Nepal                                   | 8.82  | 2.4-25.99   | 1392.53   | 378.92-4103.38      | Global       |
| Pakistan                                | 8.82  | 2.4-25.99   | 9456.81   | 2573.28-27866.49    | Global       |
| South East Asia, east Asia, and Oceania | 12.75 | 1.91-51.13  | 137683.03 | 20635.08-552511.07  | SUPER-REGION |
| Asia, east                              | 15.86 | 3.02-48.64  | 115885.54 | 22080.88-355315.45  | REGION       |
| China                                   | 14.86 | 14.52-15.21 | 106610.11 | 104213.93-109161.15 | Country      |
| Dem. People's Republic of Korea         | 15.86 | 3.02-48.64  | 2088.79   | 397.74-6405.98      | Region       |
| Asia, South East                        | 12.75 | 1.91-51.13  | 137683.03 | 20635.08-552511.07  | REGION       |
| Cambodia                                | 12.75 | 1.91-51.13  | 1090.96   | 163.43-4374.95      | Super-region |
| Indonesia                               | 12.75 | 1.91-51.13  | 17315.08  | 2593.87-69436.88    | Super-region |
| Lao People's Democratic Republic        | 12.75 | 1.91-51.13  | 462.03    | 69.21-1852.82       | Super-region |
| Malaysia                                | 12.75 | 1.91-51.13  | 2006.21   | 300.54-8045.28      | Super-region |
| Maldives                                | 12.75 | 1.91-51.13  | 25.2      | 3.77-101.04         | Super-region |
| Mauritius                               | 12.75 | 1.91-51.13  | 82.13     | 12.3-329.37         | Super-region |
| Myanmar                                 | 12.75 | 1.91-51.13  | 3594.15   | 538.42-14413.26     | Super-region |
| Philippines                             | 12.75 | 1.91-51.13  | 6955.21   | 1041.92-27891.76    | Super-region |
| Seychelles                              | 12.75 | 1.91-51.13  | 6.11      | 0.91-24.49          | Super-region |
| Sri Lanka                               | 12.75 | 1.91-51.13  | 1421.08   | 212.88-5698.8       | Super-region |
| Thailand                                | 12.75 | 1.91-51.13  | 4568.05   | 684.31-18318.79     | Super-region |
| Timor-Leste                             | 12.75 | 1.91-51.13  | 83.16     | 12.46-333.47        | Super-region |
| Vietnam                                 | 12.75 | 1.91-51.13  | 6212.09   | 930.59-24911.68     | Super-region |
| Oceania                                 | 12.75 | 1.91-51.13  | 137683.03 | 20635.08-552511.07  | REGION       |
| Fiji                                    | 12.75 | 1.91-51.13  | 56.41     | 8.45-226.21         | Super-region |

|                                  |       |            |         |                     |              |
|----------------------------------|-------|------------|---------|---------------------|--------------|
| Guam                             | 12.75 | 1.91-51.13 | 10.66   | 1.6-42.76           | Super-region |
| Kiribati                         | 12.75 | 1.91-51.13 | 7.74    | 1.16-31.04          | Super-region |
| Marshall Islands                 | 12.75 | 1.91-51.13 | 3.47    | 0.52-13.93          | Super-region |
| Micronesia (Fed. States of)      | 12.75 | 1.91-51.13 | 7.21    | 1.08-28.91          | Super-region |
| Papua New Guinea                 | 12.75 | 1.91-51.13 | 558.32  | 83.64-2238.96       | Super-region |
| Samoa                            | 12.75 | 1.91-51.13 | 12.2    | 1.83-48.93          | Super-region |
| Solomon Islands                  | 12.75 | 1.91-51.13 | 43.05   | 6.45-172.62         | Super-region |
| Tonga                            | 12.75 | 1.91-51.13 | 6.73    | 1.01-26.99          | Super-region |
| Vanuatu                          | 12.75 | 1.91-51.13 | 19.31   | 2.89-77.44          | Super-region |
| Sub-Saharan Africa               | 8.82  | 2.4-25.99  | 340649  | 92606.03-1004738.97 | SUPER-REGION |
| Sub-Saharan Africa, central      | 8.82  | 2.4-25.99  | 340649  | 92606.03-1004738.97 | REGION       |
| Angola                           | 8.82  | 2.4-25.99  | 1464.59 | 398.53-4315.74      | Global       |
| Central African Republic         | 8.82  | 2.4-25.99  | 214.83  | 58.46-633.04        | Global       |
| Congo                            | 8.82  | 2.4-25.99  | 243.56  | 66.27-717.69        | Global       |
| Democratic Republic of the Congo | 8.82  | 2.4-25.99  | 3955.87 | 1076.43-11656.8     | Global       |
| Equatorial Guinea                | 8.82  | 2.4-25.99  | 54.91   | 14.94-161.82        | Global       |
| Gabon                            | 8.82  | 2.4-25.99  | 96.39   | 26.23-284.04        | Global       |
| Sub-Saharan Africa, eastern      | 8.82  | 2.4-25.99  | 340649  | 92606.03-1004738.97 | REGION       |
| Burundi                          | 8.82  | 2.4-25.99  | 528.4   | 143.78-1557.04      | Global       |
| Comoros                          | 8.82  | 2.4-25.99  | 38.01   | 10.34-112           | Global       |
| Djibouti                         | 8.82  | 2.4-25.99  | 41.37   | 11.26-121.89        | Global       |
| Eritrea                          | 8.82  | 2.4-25.99  | 156.01  | 42.45-459.73        | Global       |
| Ethiopia                         | 8.82  | 2.4-25.99  | 5066.78 | 1378.72-14930.34    | Global       |
| Kenya                            | 8.82  | 2.4-25.99  | 2386.05 | 649.27-7031.01      | Global       |
| Madagascar                       | 8.82  | 2.4-25.99  | 1223.89 | 333.03-3606.46      | Global       |
| Malawi                           | 8.82  | 2.4-25.99  | 855.18  | 232.7-2519.97       | Global       |
| Mozambique                       | 8.82  | 2.4-25.99  | 1417.13 | 385.61-4175.86      | Global       |
| Rwanda                           | 8.82  | 2.4-25.99  | 580.78  | 158.03-1711.38      | Global       |
| Somalia                          | 8.82  | 2.4-25.99  | 702.88  | 191.26-2071.17      | Global       |
| South Sudan                      | 8.82  | 2.4-25.99  | 493.1   | 134.18-1453.02      | Global       |
| Uganda                           | 8.82  | 2.4-25.99  | 2045.75 | 556.67-6028.23      | Global       |
| United Republic of Tanzania      | 8.82  | 2.4-25.99  | 2635.69 | 717.19-7766.62      | Global       |
| Zambia                           | 8.82  | 2.4-25.99  | 818.58  | 222.74-2412.12      | Global       |
| Sub-Saharan Africa, southern     | 8.82  | 2.4-25.99  | 340649  | 92606.03-1004738.97 | REGION       |
| Botswana                         | 8.82  | 2.4-25.99  | 106.94  | 29.1-315.13         | Global       |
| Lesotho                          | 8.82  | 2.4-25.99  | 95.72   | 26.05-282.07        | Global       |
| Namibia                          | 8.82  | 2.4-25.99  | 115.47  | 31.42-340.27        | Global       |
| South Africa                     | 8.82  | 2.4-25.99  | 2654.17 | 722.22-7821.08      | Global       |
| Eswatini                         | 8.82  | 2.4-25.99  | 52.03   | 14.16-153.32        | Global       |
| Zimbabwe                         | 8.82  | 2.4-25.99  | 685.39  | 186.5-2019.66       | Global       |
| Sub-Saharan Africa, western      | 8.82  | 2.4-25.99  | 340649  | 92606.03-1004738.97 | REGION       |
| Benin                            | 8.82  | 2.4-25.99  | 535.28  | 145.65-1577.31      | Global       |
| Burkina Faso                     | 8.82  | 2.4-25.99  | 922.45  | 251.01-2718.18      | Global       |
| Cote d'Ivoire                    | 8.82  | 2.4-25.99  | 1153.47 | 313.87-3398.94      | Global       |
| Cameroon                         | 8.82  | 2.4-25.99  | 1170.31 | 318.45-3448.56      | Global       |
| Cabo Verde                       | 8.82  | 2.4-25.99  | 24.42   | 6.64-71.96          | Global       |
| Chad                             | 8.82  | 2.4-25.99  | 725.5   | 197.42-2137.85      | Global       |
| Gambia                           | 8.82  | 2.4-25.99  | 107.44  | 29.23-316.59        | Global       |
| Ghana                            | 8.82  | 2.4-25.99  | 1351.48 | 367.75-3982.43      | Global       |
| Guinea                           | 8.82  | 2.4-25.99  | 597.96  | 162.71-1762.01      | Global       |
| Guinea-Bissau                    | 8.82  | 2.4-25.99  | 88.67   | 24.13-261.28        | Global       |
| Liberia                          | 8.82  | 2.4-25.99  | 221.84  | 60.36-653.68        | Global       |
| Mali                             | 8.82  | 2.4-25.99  | 891.32  | 242.54-2626.46      | Global       |
| Mauritania                       | 8.82  | 2.4-25.99  | 204.15  | 55.55-601.58        | Global       |
| Niger                            | 8.82  | 2.4-25.99  | 1061.62 | 288.88-3128.28      | Global       |
| Nigeria                          | 8.82  | 2.4-25.99  | 8967.29 | 2440.08-26424.02    | Global       |
| Sao Tome and Principe            | 8.82  | 2.4-25.99  | 9.66    | 2.63-28.46          | Global       |
| Senegal                          | 8.82  | 2.4-25.99  | 756.15  | 205.76-2228.16      | Global       |

|              |      |           |        |               |        |
|--------------|------|-----------|--------|---------------|--------|
| Sierra Leone | 8.82 | 2.4-25.99 | 352.42 | 95.9-1038.49  | Global |
| Togo         | 8.82 | 2.4-25.99 | 366.85 | 99.82-1081.01 | Global |

**Table S15. Estimated incidence of SLE diagnosed by physician/ dermatologist for male adults.**

| Country/Region/Super-region                      | Expected Prevalence | 95% Confidence Interval of Prevalence | Expected Patient Number | 95% Confidence Interval of Patient Number | Hierarchy of Region in Estimate |
|--------------------------------------------------|---------------------|---------------------------------------|-------------------------|-------------------------------------------|---------------------------------|
| Global                                           | 2.2                 | 0.59-6.41                             | 56913.4                 | 15366.75-166168.95                        | GLOBAL                          |
| Central Europe, eastern Europe, and central Asia | 1.3                 | 0.28-3.89                             | 1890.44                 | 411.95-5503.92                            | SUPER-REGION                    |
| Asia, central                                    | 0.51                | 0.07-1.6                              | 149.6                   | 17-465.17                                 | REGION                          |
| Armenia                                          | 0.51                | 0.07-1.6                              | 4.97                    | 0.68-15.6                                 | Region                          |
| Azerbaijan                                       | 0.51                | 0.07-1.6                              | 17.61                   | 2.42-55.24                                | Region                          |
| Georgia                                          | 0.51                | 0.07-1.6                              | 6.97                    | 0.96-21.86                                | Region                          |
| Kazakhstan                                       | 0.24                | 0.07-0.52                             | 13.63                   | 3-31                                      | Country                         |
| Kyrgyzstan                                       | 0.51                | 0.07-1.6                              | 9.6                     | 1.32-30.11                                | Region                          |
| Mongolia                                         | 0.51                | 0.07-1.6                              | 5.04                    | 0.69-15.82                                | Region                          |
| Tajikistan                                       | 0.51                | 0.07-1.6                              | 13.07                   | 1.79-41.01                                | Region                          |
| Turkmenistan                                     | 0.51                | 0.07-1.6                              | 9.09                    | 1.25-28.53                                | Region                          |
| Uzbekistan                                       | 0.51                | 0.07-1.6                              | 53.29                   | 7.31-167.19                               | Region                          |
| Europe, central                                  | 4.92                | 1.15-11.37                            | 2142.16                 | 489.97-5024.6                             | REGION                          |
| Albania                                          | 4.92                | 1.15-11.37                            | 53.98                   | 12.62-124.75                              | Region                          |
| Bosnia and Herzegovina                           | 4.92                | 1.15-11.37                            | 62.86                   | 14.69-145.27                              | Region                          |
| Bulgaria                                         | 4.92                | 1.15-11.37                            | 132.2                   | 30.9-305.52                               | Region                          |
| Croatia                                          | 4.92                | 1.15-11.37                            | 77.28                   | 18.06-178.59                              | Region                          |
| Czechia                                          | 4.92                | 1.15-11.37                            | 204.47                  | 47.79-472.53                              | Region                          |
| Hungary                                          | 1.55                | 1.49-1.61                             | 56.24                   | 41-71.02                                  | Country                         |
| Montenegro                                       | 4.92                | 1.15-11.37                            | 11.37                   | 2.66-26.27                                | Region                          |
| Poland                                           | 29.11               | 28.46-29.86                           | 4224.08                 | 4064.98-4391.05                           | Country                         |
| Romania                                          | 4.92                | 1.15-11.37                            | 359.54                  | 84.04-830.9                               | Region                          |
| Serbia                                           | 4.92                | 1.15-11.37                            | 163.37                  | 38.19-377.55                              | Region                          |
| Slovakia                                         | 4.92                | 1.15-11.37                            | 102.79                  | 24.03-237.55                              | Region                          |
| Slovenia                                         | 4.92                | 1.15-11.37                            | 40.64                   | 9.5-93.91                                 | Region                          |
| North Macedonia                                  | 4.92                | 1.15-11.37                            | 39.56                   | 9.25-91.43                                | Region                          |
| Europe, eastern                                  | 1.9                 | 0.08-8.97                             | 372.21                  | 47.98-1150.35                             | REGION                          |
| Belarus                                          | 1.9                 | 0.08-8.97                             | 63.42                   | 2.67-299.43                               | Region                          |
| Estonia                                          | 2.51                | 0.13-15.07                            | 3.03                    | 0-14                                      | Country                         |
| Latvia                                           | 1.9                 | 0.08-8.97                             | 12.63                   | 0.53-59.62                                | Region                          |
| Lithuania                                        | 1.9                 | 0.08-8.97                             | 18.63                   | 0.78-87.95                                | Region                          |
| Republic of Moldova                              | 1.9                 | 0.08-8.97                             | 28.46                   | 1.2-134.34                                | Region                          |
| Russia                                           | 1.81                | 0.08-11.11                            | 215.26                  | 25-796.5                                  | Country                         |
| Ukraine                                          | 0.97                | 0.03-5.59                             | 37.14                   | 3-140                                     | Country                         |
| High income                                      | 1.56                | 0.53-3.95                             | 6423.17                 | 2144.65-16480.6                           | SUPER-REGION                    |
| Asia Pacific, high income                        | 1.94                | 0.67-4.68                             | 1448.4                  | 493.88-3492.7                             | REGION                          |
| Brunei Darussalam                                | 1.94                | 0.67-4.68                             | 3.09                    | 1.07-7.46                                 | Region                          |
| Japan                                            | 1.68                | 1.15-2.31                             | 853.3                   | 591.9-1156.1                              | Country                         |
| Republic of Korea                                | 1.88                | 1.84-1.93                             | 397.09                  | 362-437                                   | Country                         |
| Singapore                                        | 1.94                | 0.67-4.68                             | 49.55                   | 17.11-119.54                              | Region                          |
| Australasia                                      | 0.95                | 0.2-2.91                              | 104.88                  | 19-322.12                                 | REGION                          |
| Australia                                        | 0.52                | 0.31-0.79                             | 48.75                   | 26-76                                     | Country                         |
| New Zealand                                      | 0.95                | 0.2-2.91                              | 16.48                   | 3.47-50.47                                | Region                          |
| Europe, western                                  | 1.16                | 0.71-1.77                             | 1931.88                 | 1184.88-2919.1                            | REGION                          |
| Austria                                          | 1.16                | 0.71-1.77                             | 41.03                   | 25.11-62.6                                | Region                          |
| Belgium                                          | 1.16                | 0.71-1.77                             | 51.01                   | 31.22-77.83                               | Region                          |
| Cyprus                                           | 1.16                | 0.71-1.77                             | 5.36                    | 3.28-8.18                                 | Region                          |
| Denmark                                          | 0.68                | 0.65-0.72                             | 15.28                   | 8-23                                      | Country                         |

|                                           |      |            |         |                  |              |
|-------------------------------------------|------|------------|---------|------------------|--------------|
| <b>Finland</b>                            | 0.94 | 0.74-1.17  | 20.23   | 11-31            | Country      |
| <b>France</b>                             | 1.79 | 1.71-1.88  | 424.95  | 379.98-472       | Country      |
| <b>Germany</b>                            | 1.41 | 1.33-1.49  | 470.48  | 421.95-521.02    | Country      |
| <b>Greece</b>                             | 1.38 | 1.1-1.69   | 56.83   | 39-79            | Country      |
| <b>Iceland</b>                            | 1.16 | 0.71-1.77  | 1.47    | 0.9-2.24         | Region       |
| <b>Ireland</b>                            | 1.16 | 0.71-1.77  | 20.47   | 12.53-31.24      | Region       |
| <b>Israel</b>                             | 1.16 | 0.71-1.77  | 31.65   | 19.37-48.3       | Region       |
| <b>Italy</b>                              | 0.59 | 0.38-0.86  | 141.47  | 85.97-204.02     | Country      |
| <b>Luxembourg</b>                         | 1.16 | 0.71-1.77  | 2.89    | 1.77-4.41        | Region       |
| <b>Malta</b>                              | 0.55 | 0.26-1     | 1       | 0-3              | Country      |
| <b>Netherlands</b>                        | 2.2  | 0.97-4.01  | 146.13  | 59-264.12        | Country      |
| <b>Norway</b>                             | 0.64 | 0.39-0.94  | 13.52   | 6-24             | Country      |
| <b>Portugal</b>                           | 1.16 | 0.71-1.77  | 44.91   | 27.49-68.53      | Region       |
| <b>Spain</b>                              | 1.45 | 1.09-1.83  | 266.37  | 193-344.02       | Country      |
| <b>Sweden</b>                             | 2.02 | 1.74-2.34  | 78.16   | 58-99            | Country      |
| <b>Switzerland</b>                        | 1.16 | 0.71-1.77  | 39.59   | 24.23-60.41      | Region       |
| <b>United Kingdom</b>                     | 1.51 | 1.45-1.57  | 385.73  | 345-427          | Country      |
| <b>Latin America, southern</b>            | 1.11 | 0.25-3.11  | 252.31  | 56-713.02        | REGION       |
| <b>Argentina</b>                          | 0.74 | 0.5-1.04   | 107.81  | 70-153           | Country      |
| <b>Chile</b>                              | 1.11 | 0.25-3.11  | 76.82   | 17.3-215.24      | Region       |
| <b>Uruguay</b>                            | 1.11 | 0.25-3.11  | 13.23   | 2.98-37.06       | Region       |
| <b>North America, high income</b>         | 2.46 | 0.76-5.87  | 3358.04 | 1033.85-7995.12  | REGION       |
| <b>Canada</b>                             | 1.34 | 1.24-1.46  | 197.19  | 167-226          | Country      |
| <b>United States of America</b>           | 4.63 | 4.53-4.73  | 5642.3  | 5453.97-5840.15  | Country      |
| <b>Latin America and Caribbean</b>        | 2.69 | 0.57-10.55 | 5153.02 | 1070.92-20174.72 | SUPER-REGION |
| <b>Caribbean</b>                          | 3.28 | 0.74-10.98 | 447.98  | 104.97-1307.6    | REGION       |
| <b>Antigua and Barbuda</b>                | 3.28 | 0.74-10.98 | 1.08    | 0.24-3.61        | Region       |
| <b>Bahamas</b>                            | 3.28 | 0.74-10.98 | 4.32    | 0.97-14.46       | Region       |
| <b>Barbados</b>                           | 3.83 | 0.74-13.5  | 3.14    | 0-7              | Country      |
| <b>Belize</b>                             | 3.28 | 0.74-10.98 | 3.9     | 0.88-13.04       | Region       |
| <b>Cuba</b>                               | 3.28 | 0.74-10.98 | 143.17  | 32.3-479.28      | Region       |
| <b>Dominican Republic</b>                 | 3.28 | 0.74-10.98 | 111.86  | 25.24-374.46     | Region       |
| <b>Grenada</b>                            | 3.28 | 0.74-10.98 | 1.28    | 0.29-4.3         | Region       |
| <b>Guyana</b>                             | 3.28 | 0.74-10.98 | 8.07    | 1.82-27.02       | Region       |
| <b>Haiti</b>                              | 3.28 | 0.74-10.98 | 103.89  | 23.44-347.77     | Region       |
| <b>Jamaica</b>                            | 3.28 | 0.74-10.98 | 32.63   | 7.36-109.22      | Region       |
| <b>Puerto Rico</b>                        | 3.28 | 0.74-10.98 | 33.6    | 7.58-112.49      | Region       |
| <b>Saint Lucia</b>                        | 3.28 | 0.74-10.98 | 2.2     | 0.5-7.37         | Region       |
| <b>Saint Vincent and the Grenadines</b>   | 3.28 | 0.74-10.98 | 1.29    | 0.29-4.31        | Region       |
| <b>Suriname</b>                           | 3.28 | 0.74-10.98 | 6.15    | 1.39-20.59       | Region       |
| <b>Trinidad and Tobago</b>                | 3.28 | 0.74-10.98 | 16.5    | 3.72-55.24       | Region       |
| <b>Virgin Island (US)</b>                 | 3.28 | 0.74-10.98 | 1.18    | 0.27-3.94        | Region       |
| <b>Latin America, Andean</b>              | 2.69 | 0.57-10.55 | 5153.02 | 1070.92-20174.72 | REGION       |
| <b>Bolivia</b>                            | 2.69 | 0.57-10.55 | 93.53   | 19.82-366.81     | Super-region |
| <b>Ecuador</b>                            | 2.69 | 0.57-10.55 | 149.52  | 31.68-586.41     | Super-region |
| <b>Peru</b>                               | 2.69 | 0.57-10.55 | 298.9   | 63.34-1172.27    | Super-region |
| <b>Latin America, central</b>             | 2.69 | 0.57-10.55 | 5153.02 | 1070.92-20174.72 | REGION       |
| <b>Colombia</b>                           | 2.69 | 0.57-10.55 | 458.51  | 97.16-1798.25    | Super-region |
| <b>Costa Rica</b>                         | 2.69 | 0.57-10.55 | 48.86   | 10.35-191.62     | Super-region |
| <b>El Salvador</b>                        | 2.69 | 0.57-10.55 | 50      | 10.59-196.09     | Super-region |
| <b>Guatemala</b>                          | 2.69 | 0.57-10.55 | 128.68  | 27.27-504.68     | Super-region |
| <b>Honduras</b>                           | 2.69 | 0.57-10.55 | 77.21   | 16.36-302.81     | Super-region |
| <b>Mexico</b>                             | 2.69 | 0.57-10.55 | 1085.21 | 229.95-4256.13   | Super-region |
| <b>Nicaragua</b>                          | 2.69 | 0.57-10.55 | 52.45   | 11.11-205.72     | Super-region |
| <b>Panama</b>                             | 2.69 | 0.57-10.55 | 37.49   | 7.94-147.03      | Super-region |
| <b>Venezuela (Bolivarian Republic of)</b> | 2.69 | 0.57-10.55 | 235.41  | 49.88-923.28     | Super-region |

|                                                |      |            |          |                    |              |
|------------------------------------------------|------|------------|----------|--------------------|--------------|
| <b>Latin America, tropical</b>                 | 3.46 | 0.74-11.93 | 2627.87  | 544.95-9004.47     | REGION       |
| <b>Brazil</b>                                  | 3.16 | 2.43-3.97  | 2326.57  | 1783.87-2927.48    | Country      |
| <b>Paraguay</b>                                | 3.46 | 0.74-11.93 | 77.29    | 16.53-266.49       | Region       |
| <b>North Africa and Middle East</b>            | 2.81 | 0.49-10.41 | 5489.97  | 948.65-20137.25    | SUPER-REGION |
| <b>North Africa and the Middle East</b>        | 3.37 | 1-8.44     | 6585.53  | 1946.97-16485.1    | REGION       |
| <b>Afghanistan</b>                             | 3.37 | 1-8.44     | 312.22   | 92.65-781.93       | Region       |
| <b>Algeria</b>                                 | 3.37 | 1-8.44     | 464.35   | 137.79-1162.93     | Region       |
| <b>Bahrain</b>                                 | 3.37 | 1-8.44     | 30.08    | 8.93-75.34         | Region       |
| <b>Egypt</b>                                   | 3.37 | 1-8.44     | 989.35   | 293.58-2477.78     | Region       |
| <b>Iran (Islamic Republic of)</b>              | 3.37 | 1-8.44     | 974.35   | 289.13-2440.22     | Region       |
| <b>Iraq</b>                                    | 3.37 | 1-8.44     | 351.57   | 104.32-880.49      | Region       |
| <b>Jordan</b>                                  | 3.37 | 1-8.44     | 98.85    | 29.33-247.57       | Region       |
| <b>Kuwait</b>                                  | 3.37 | 1-8.44     | 67.35    | 19.98-168.66       | Region       |
| <b>Lebanon</b>                                 | 3.37 | 1-8.44     | 75.99    | 22.55-190.31       | Region       |
| <b>Libya</b>                                   | 3.37 | 1-8.44     | 74.17    | 22.01-185.76       | Region       |
| <b>Morocco</b>                                 | 3.37 | 1-8.44     | 395.24   | 117.28-989.87      | Region       |
| <b>Palestine</b>                               | 3.37 | 1-8.44     | 44.61    | 13.24-111.72       | Region       |
| <b>Oman</b>                                    | 3.37 | 1-8.44     | 90.55    | 26.87-226.79       | Region       |
| <b>Qatar</b>                                   | 3.37 | 1-8.44     | 64.2     | 19.05-160.79       | Region       |
| <b>Saudi Arabia</b>                            | 3.37 | 1-8.44     | 493.38   | 146.4-1235.63      | Region       |
| <b>Sudan</b>                                   | 3.37 | 1-8.44     | 358.29   | 106.32-897.31      | Region       |
| <b>Syrian Arab Republic</b>                    | 3.37 | 1-8.44     | 175.57   | 52.1-439.7         | Region       |
| <b>Sudan</b>                                   | 3.37 | 1-8.44     | 358.29   | 106.32-897.31      | Region       |
| <b>Tunisia</b>                                 | 3.37 | 1-8.44     | 133.89   | 39.73-335.33       | Region       |
| <b>Turkey</b>                                  | 2.56 | 1.73-3.51  | 713.06   | 473.92-981.05      | Country      |
| <b>United Arab Emirates</b>                    | 4.51 | 2.23-7.51  | 265.34   | 115.98-454.02      | Country      |
| <b>Yemen</b>                                   | 3.37 | 1-8.44     | 252.45   | 74.91-632.24       | Region       |
| <b>South Asia</b>                              | 2.2  | 0.59-6.41  | 56913.4  | 15366.75-166168.95 | SUPER-REGION |
| <b>Asia, south</b>                             | 2.2  | 0.59-6.41  | 56913.4  | 15366.75-166168.95 | REGION       |
| <b>Bangladesh</b>                              | 2.2  | 0.59-6.41  | 1161.1   | 311.39-3383.03     | Global       |
| <b>Bhutan</b>                                  | 2.2  | 0.59-6.41  | 6.09     | 1.63-17.75         | Global       |
| <b>India</b>                                   | 2.2  | 0.59-6.41  | 10142.1  | 2719.93-29550.4    | Global       |
| <b>Nepal</b>                                   | 2.2  | 0.59-6.41  | 164.95   | 44.24-480.62       | Global       |
| <b>Pakistan</b>                                | 2.2  | 0.59-6.41  | 1371.44  | 367.8-3995.88      | Global       |
| <b>South East Asia, east Asia, and Oceania</b> | 2.93 | 0.44-11.81 | 23682.35 | 3478.02-95646.3    | SUPER-REGION |
| <b>Asia, east</b>                              | 3.52 | 0.67-10.79 | 20386.29 | 3840.93-62804.53   | REGION       |
| <b>China</b>                                   | 3.29 | 3.21-3.37  | 18769.3  | 18222.7-19334.15   | Country      |
| <b>Dem. People's Republic of Korea</b>         | 3.52 | 0.67-10.79 | 318.02   | 60.53-974.85       | Region       |
| <b>Asia, South East</b>                        | 2.93 | 0.44-11.81 | 23682.35 | 3478.02-95646.3    | REGION       |
| <b>Cambodia</b>                                | 2.93 | 0.44-11.81 | 140.35   | 21.08-565.71       | Super-region |
| <b>Indonesia</b>                               | 2.93 | 0.44-11.81 | 2619.29  | 393.34-10557.61    | Super-region |
| <b>Lao People's Democratic Republic</b>        | 2.93 | 0.44-11.81 | 61.8     | 9.28-249.1         | Super-region |
| <b>Malaysia</b>                                | 2.93 | 0.44-11.81 | 332.47   | 49.93-1340.11      | Super-region |
| <b>Maldives</b>                                | 2.93 | 0.44-11.81 | 8.05     | 1.21-32.45         | Super-region |
| <b>Mauritius</b>                               | 2.93 | 0.44-11.81 | 13.79    | 2.07-55.57         | Super-region |
| <b>Myanmar</b>                                 | 2.93 | 0.44-11.81 | 489.27   | 73.47-1972.1       | Super-region |
| <b>Philippines</b>                             | 2.93 | 0.44-11.81 | 959.46   | 144.08-3867.3      | Super-region |
| <b>Seychelles</b>                              | 2.93 | 0.44-11.81 | 1.03     | 0.15-4.15          | Super-region |
| <b>Sri Lanka</b>                               | 2.93 | 0.44-11.81 | 201.33   | 30.23-811.51       | Super-region |
| <b>Thailand</b>                                | 2.93 | 0.44-11.81 | 755.18   | 113.41-3043.93     | Super-region |
| <b>Timor-Leste</b>                             | 2.93 | 0.44-11.81 | 10.01    | 1.5-40.35          | Super-region |
| <b>Vietnam</b>                                 | 2.93 | 0.44-11.81 | 976.39   | 146.63-3935.56     | Super-region |
| <b>Oceania</b>                                 | 2.93 | 0.44-11.81 | 23682.35 | 3478.02-95646.3    | REGION       |
| <b>Fiji</b>                                    | 2.93 | 0.44-11.81 | 8.27     | 1.24-33.33         | Super-region |

|                                  |      |            |         |                    |              |
|----------------------------------|------|------------|---------|--------------------|--------------|
| Guam                             | 2.93 | 0.44-11.81 | 1.68    | 0.25-6.77          | Super-region |
| Kiribati                         | 2.93 | 0.44-11.81 | 0.92    | 0.14-3.72          | Super-region |
| Marshall Islands                 | 2.93 | 0.44-11.81 | 0.41    | 0.06-1.65          | Super-region |
| Micronesia (Fed. States of)      | 2.93 | 0.44-11.81 | 1       | 0.15-4.04          | Super-region |
| Papua New Guinea                 | 2.93 | 0.44-11.81 | 72.28   | 10.85-291.34       | Super-region |
| Samoa                            | 2.93 | 0.44-11.81 | 1.59    | 0.24-6.42          | Super-region |
| Solomon Islands                  | 2.93 | 0.44-11.81 | 5.02    | 0.75-20.23         | Super-region |
| Tonga                            | 2.93 | 0.44-11.81 | 0.82    | 0.12-3.3           | Super-region |
| Vanuatu                          | 2.93 | 0.44-11.81 | 2.32    | 0.35-9.35          | Super-region |
| Sub-Saharan Africa               | 2.2  | 0.59-6.41  | 56913.4 | 15366.75-166168.95 | SUPER-REGION |
| Sub-Saharan Africa, central      | 2.2  | 0.59-6.41  | 56913.4 | 15366.75-166168.95 | REGION       |
| Angola                           | 2.2  | 0.59-6.41  | 150.71  | 40.42-439.13       | Global       |
| Central African Republic         | 2.2  | 0.59-6.41  | 22.82   | 6.12-66.5          | Global       |
| Congo                            | 2.2  | 0.59-6.41  | 29.03   | 7.79-84.59         | Global       |
| Democratic Republic of the Congo | 2.2  | 0.59-6.41  | 423.79  | 113.65-1234.78     | Global       |
| Equatorial Guinea                | 2.2  | 0.59-6.41  | 10.07   | 2.7-29.34          | Global       |
| Gabon                            | 2.2  | 0.59-6.41  | 13.58   | 3.64-39.55         | Global       |
| Sub-Saharan Africa, eastern      | 2.2  | 0.59-6.41  | 56913.4 | 15366.75-166168.95 | REGION       |
| Burundi                          | 2.2  | 0.59-6.41  | 56.77   | 15.23-165.41       | Global       |
| Comoros                          | 2.2  | 0.59-6.41  | 4.85    | 1.3-14.13          | Global       |
| Djibouti                         | 2.2  | 0.59-6.41  | 7.06    | 1.89-20.57         | Global       |
| Eritrea                          | 2.2  | 0.59-6.41  | 18.53   | 4.97-53.98         | Global       |
| Ethiopia                         | 2.2  | 0.59-6.41  | 610.14  | 163.63-1777.72     | Global       |
| Kenya                            | 2.2  | 0.59-6.41  | 291.16  | 78.08-848.35       | Global       |
| Madagascar                       | 2.2  | 0.59-6.41  | 147.52  | 39.56-429.83       | Global       |
| Malawi                           | 2.2  | 0.59-6.41  | 92.42   | 24.78-269.27       | Global       |
| Mozambique                       | 2.2  | 0.59-6.41  | 143.5   | 38.49-418.12       | Global       |
| Rwanda                           | 2.2  | 0.59-6.41  | 68.83   | 18.46-200.54       | Global       |
| Somalia                          | 2.2  | 0.59-6.41  | 73.03   | 19.58-212.77       | Global       |
| South Sudan                      | 2.2  | 0.59-6.41  | 58.4    | 15.66-170.16       | Global       |
| Uganda                           | 2.2  | 0.59-6.41  | 204.4   | 54.82-595.55       | Global       |
| United Republic of Tanzania      | 2.2  | 0.59-6.41  | 295.98  | 79.38-862.38       | Global       |
| Zambia                           | 2.2  | 0.59-6.41  | 87.07   | 23.35-253.68       | Global       |
| Sub-Saharan Africa, southern     | 2.2  | 0.59-6.41  | 56913.4 | 15366.75-166168.95 | REGION       |
| Botswana                         | 2.2  | 0.59-6.41  | 13.81   | 3.7-40.24          | Global       |
| Lesotho                          | 2.2  | 0.59-6.41  | 13.26   | 3.56-38.64         | Global       |
| Namibia                          | 2.2  | 0.59-6.41  | 14.12   | 3.79-41.14         | Global       |
| South Africa                     | 2.2  | 0.59-6.41  | 398.35  | 106.83-1160.64     | Global       |
| Eswatini                         | 2.2  | 0.59-6.41  | 6.3     | 1.69-18.35         | Global       |
| Zimbabwe                         | 2.2  | 0.59-6.41  | 69.27   | 18.58-201.82       | Global       |
| Sub-Saharan Africa, western      | 2.2  | 0.59-6.41  | 56913.4 | 15366.75-166168.95 | REGION       |
| Benin                            | 2.2  | 0.59-6.41  | 62.07   | 16.65-180.84       | Global       |
| Burkina Faso                     | 2.2  | 0.59-6.41  | 100.07  | 26.84-291.58       | Global       |
| Cote d'Ivoire                    | 2.2  | 0.59-6.41  | 139.59  | 37.44-406.71       | Global       |
| Cameroon                         | 2.2  | 0.59-6.41  | 136.59  | 36.63-397.98       | Global       |
| Cabo Verde                       | 2.2  | 0.59-6.41  | 3.86    | 1.04-11.25         | Global       |
| Chad                             | 2.2  | 0.59-6.41  | 75.59   | 20.27-220.25       | Global       |
| Gambia                           | 2.2  | 0.59-6.41  | 11.74   | 3.15-34.21         | Global       |
| Ghana                            | 2.2  | 0.59-6.41  | 181.64  | 48.71-529.24       | Global       |
| Guinea                           | 2.2  | 0.59-6.41  | 60.36   | 16.19-175.85       | Global       |
| Guinea-Bissau                    | 2.2  | 0.59-6.41  | 9.76    | 2.62-28.44         | Global       |
| Liberia                          | 2.2  | 0.59-6.41  | 26.86   | 7.2-78.26          | Global       |
| Mali                             | 2.2  | 0.59-6.41  | 91.62   | 24.57-266.93       | Global       |
| Mauritania                       | 2.2  | 0.59-6.41  | 25.5    | 6.84-74.3          | Global       |
| Niger                            | 2.2  | 0.59-6.41  | 103.66  | 27.8-302.03        | Global       |
| Nigeria                          | 2.2  | 0.59-6.41  | 1044.86 | 280.21-3044.34     | Global       |
| Sao Tome and Principe            | 2.2  | 0.59-6.41  | 1.12    | 0.3-3.26           | Global       |

|              |     |           |       |              |        |
|--------------|-----|-----------|-------|--------------|--------|
| Senegal      | 2.2 | 0.59-6.41 | 80.69 | 21.64-235.09 | Global |
| Sierra Leone | 2.2 | 0.59-6.41 | 42.46 | 11.39-123.71 | Global |
| Togo         | 2.2 | 0.59-6.41 | 43.67 | 11.71-127.24 | Global |

**Table S16. Estimated incidence of SLE diagnosed by physician/ dermatologist for female adults.**

| Country/Region/Super-region                      | Expected Prevalence | 95% Confidence Interval of Prevalence | Expected Patient Number | 95% Confidence Interval of Patient Number | Hierarchy of Region in Estimate |
|--------------------------------------------------|---------------------|---------------------------------------|-------------------------|-------------------------------------------|---------------------------------|
| Global                                           | 12.38               | 3.36-36.55                            | 322880.08               | 87798.88-953808.65                        | GLOBAL                          |
| Central Europe, eastern Europe, and central Asia | 7.3                 | 1.58-21.92                            | 12249.37                | 2741.35-36282.37                          | SUPER-REGION                    |
| Asia, central                                    | 2.88                | 0.38-8.97                             | 902.4                   | 112-2792.67                               | REGION                          |
| Armenia                                          | 2.88                | 0.38-8.97                             | 34.56                   | 4.56-107.65                               | Region                          |
| Azerbaijan                                       | 2.88                | 0.38-8.97                             | 105.55                  | 13.93-328.73                              | Region                          |
| Georgia                                          | 2.88                | 0.38-8.97                             | 46.04                   | 6.07-143.38                               | Region                          |
| Kazakhstan                                       | 1.34                | 0.39-2.94                             | 87.29                   | 21.98-187.1                               | Country                         |
| Kyrgyzstan                                       | 2.88                | 0.38-8.97                             | 57.95                   | 7.65-180.49                               | Region                          |
| Mongolia                                         | 2.88                | 0.38-8.97                             | 30.28                   | 4-94.31                                   | Region                          |
| Tajikistan                                       | 2.88                | 0.38-8.97                             | 75.12                   | 9.91-233.97                               | Region                          |
| Turkmenistan                                     | 2.88                | 0.38-8.97                             | 54.91                   | 7.24-171.01                               | Region                          |
| Uzbekistan                                       | 2.88                | 0.38-8.97                             | 312.33                  | 41.21-972.79                              | Region                          |
| Europe, central                                  | 27.68               | 6.45-64.24                            | 13056.07                | 3018.88-30494.92                          | REGION                          |
| Albania                                          | 27.68               | 6.45-64.24                            | 300.3                   | 69.98-696.95                              | Region                          |
| Bosnia and Herzegovina                           | 27.68               | 6.45-64.24                            | 376.87                  | 87.82-874.64                              | Region                          |
| Bulgaria                                         | 27.68               | 6.45-64.24                            | 809.9                   | 188.72-1879.61                            | Region                          |
| Croatia                                          | 27.68               | 6.45-64.24                            | 481.74                  | 112.26-1118.04                            | Region                          |
| Czechia                                          | 27.68               | 6.45-64.24                            | 1211.74                 | 282.36-2812.22                            | Region                          |
| Hungary                                          | 8.7                 | 8.41-9.01                             | 361.26                  | 321.98-400                                | Country                         |
| Montenegro                                       | 27.68               | 6.45-64.24                            | 67.69                   | 15.77-157.1                               | Region                          |
| Poland                                           | 163.68              | 160.59-167.16                         | 25937.41                | 25362.92-26547.62                         | Country                         |
| Romania                                          | 27.68               | 6.45-64.24                            | 2200.11                 | 512.67-5106.04                            | Region                          |
| Serbia                                           | 27.68               | 6.45-64.24                            | 985.72                  | 229.69-2287.67                            | Region                          |
| Slovakia                                         | 27.68               | 6.45-64.24                            | 625.06                  | 145.65-1450.64                            | Region                          |
| Slovenia                                         | 27.68               | 6.45-64.24                            | 234.24                  | 54.58-543.62                              | Region                          |
| North Macedonia                                  | 27.68               | 6.45-64.24                            | 226.48                  | 52.77-525.62                              | Region                          |
| Europe, eastern                                  | 10.7                | 0.46-50.49                            | 2571.85                 | 328.95-8031.15                            | REGION                          |
| Belarus                                          | 10.7                | 0.46-50.49                            | 432.08                  | 18.58-2038.84                             | Region                          |
| Estonia                                          | 14.14               | 0.71-84.47                            | 19.6                    | 1.98-75.1                                 | Country                         |
| Latvia                                           | 10.7                | 0.46-50.49                            | 88.22                   | 3.79-416.27                               | Region                          |
| Lithuania                                        | 10.7                | 0.46-50.49                            | 128.16                  | 5.51-604.75                               | Region                          |
| Republic of Moldova                              | 10.7                | 0.46-50.49                            | 181.14                  | 7.79-854.73                               | Region                          |
| Russia                                           | 10.19               | 0.47-63.01                            | 1498.22                 | 181.85-5349.27                            | Country                         |
| Ukraine                                          | 5.44                | 0.18-31.39                            | 254.6                   | 24.98-1005.2                              | Country                         |
| High income                                      | 8.78                | 2.98-22.18                            | 37997.03                | 13160.78-95735.55                         | SUPER-REGION                    |
| Asia Pacific, high income                        | 10.93               | 3.74-26.48                            | 8525.62                 | 2886.72-20683.22                          | REGION                          |
| Brunei Darussalam                                | 10.93               | 3.74-26.48                            | 16.04                   | 5.49-38.85                                | Region                          |
| Japan                                            | 9.46                | 6.58-12.92                            | 5131.82                 | 3510.68-6948.57                           | Country                         |
| Republic of Korea                                | 10.6                | 10.41-10.81                           | 2259.21                 | 2159.95-2362.02                           | Country                         |
| Singapore                                        | 10.93               | 3.74-26.48                            | 252.53                  | 86.41-611.79                              | Region                          |
| Australasia                                      | 5.32                | 1.11-16.41                            | 612.44                  | 123.8-1859.37                             | REGION                          |
| Australia                                        | 2.91                | 1.74-4.46                             | 280.8                   | 162-435                                   | Country                         |
| New Zealand                                      | 5.32                | 1.11-16.41                            | 98.25                   | 20.5-303.07                               | Region                          |
| Europe, western                                  | 6.52                | 4.01-9.91                             | 11507.18                | 7088.27-17503.28                          | REGION                          |
| Austria                                          | 6.52                | 4.01-9.91                             | 242.42                  | 149.09-368.46                             | Region                          |
| Belgium                                          | 6.52                | 4.01-9.91                             | 298.32                  | 183.48-453.43                             | Region                          |
| Cyprus                                           | 6.52                | 4.01-9.91                             | 30.72                   | 18.9-46.7                                 | Region                          |



|                                    |       |            |          |                   |              |
|------------------------------------|-------|------------|----------|-------------------|--------------|
| Denmark                            | 3.85  | 3.67-4.05  | 87.96    | 68-107            | Country      |
| Finland                            | 5.32  | 4.15-6.54  | 118.73   | 86-152.05         | Country      |
| France                             | 10.08 | 9.61-10.56 | 2636.77  | 2480-2806         | Country      |
| Germany                            | 7.97  | 7.54-8.41  | 2767.76  | 2590.95-2951.05   | Country      |
| Greece                             | 7.76  | 6.21-9.58  | 338.74   | 263.98-427.02     | Country      |
| Iceland                            | 6.52  | 4.01-9.91  | 8.27     | 5.09-12.57        | Region       |
| Ireland                            | 6.52  | 4.01-9.91  | 119.42   | 73.45-181.51      | Region       |
| Israel                             | 6.52  | 4.01-9.91  | 185.78   | 114.26-282.38     | Region       |
| Italy                              | 3.33  | 2.13-4.82  | 860.57   | 551.88-1253.12    | Country      |
| Luxembourg                         | 6.52  | 4.01-9.91  | 15.97    | 9.82-24.28        | Region       |
| Malta                              | 3.12  | 1.45-5.61  | 5.61     | 1-12              | Country      |
| Netherlands                        | 12.4  | 5.41-22.57 | 842.26   | 368.92-1520.35    | Country      |
| Norway                             | 3.61  | 2.22-5.29  | 74.77    | 43.98-115.02      | Country      |
| Portugal                           | 6.52  | 4.01-9.91  | 291.22   | 179.11-442.63     | Region       |
| Spain                              | 8.17  | 6.14-10.43 | 1589.07  | 1176.93-2020.47   | Country      |
| Sweden                             | 11.37 | 9.76-13.18 | 444.83   | 375-532.07        | Country      |
| Switzerland                        | 6.52  | 4.01-9.91  | 229.52   | 141.16-348.86     | Region       |
| United Kingdom                     | 8.5   | 8.2-8.79   | 2267.99  | 2146.92-2397      | Country      |
| Latin America, southern            | 6.27  | 1.39-17.56 | 1542.95  | 336.85-4339.62    | REGION       |
| Argentina                          | 4.15  | 2.82-5.87  | 664.51   | 442-957.07        | Country      |
| Chile                              | 6.27  | 1.39-17.56 | 455.8    | 101.05-1276.53    | Region       |
| Uruguay                            | 6.27  | 1.39-17.56 | 83.26    | 18.46-233.18      | Region       |
| North America, high income         | 13.84 | 4.29-32.73 | 19665.64 | 6099.9-46526.28   | REGION       |
| Canada                             | 7.57  | 7.02-8.16  | 1145.94  | 1035-1263         | Country      |
| United States of America           | 26.05 | 25.62-26.5 | 33086.88 | 32414.95-33773.23 | Country      |
| Latin America and Caribbean        | 15.15 | 3.22-59.07 | 30945.6  | 6631.97-120267.6  | SUPER-REGION |
| Caribbean                          | 18.45 | 4.17-61.18 | 2653.48  | 629.9-7849.27     | REGION       |
| Antigua and Barbuda                | 18.45 | 4.17-61.18 | 6.76     | 1.53-22.4         | Region       |
| Bahamas                            | 18.45 | 4.17-61.18 | 26.58    | 6.01-88.15        | Region       |
| Barbados                           | 21.53 | 4.17-75.5  | 19.3     | 11-29             | Country      |
| Belize                             | 18.45 | 4.17-61.18 | 22.67    | 5.12-75.17        | Region       |
| Cuba                               | 18.45 | 4.17-61.18 | 832.53   | 188.16-2760.65    | Region       |
| Dominican Republic                 | 18.45 | 4.17-61.18 | 645.73   | 145.94-2141.22    | Region       |
| Grenada                            | 18.45 | 4.17-61.18 | 7.22     | 1.63-23.94        | Region       |
| Guyana                             | 18.45 | 4.17-61.18 | 45.65    | 10.32-151.36      | Region       |
| Haiti                              | 18.45 | 4.17-61.18 | 625.02   | 141.26-2072.55    | Region       |
| Jamaica                            | 18.45 | 4.17-61.18 | 190.93   | 43.15-633.12      | Region       |
| Puerto Rico                        | 18.45 | 4.17-61.18 | 221.35   | 50.03-733.99      | Region       |
| Saint Lucia                        | 18.45 | 4.17-61.18 | 12.98    | 2.93-43.05        | Region       |
| Saint Vincent and the Grenadines   | 18.45 | 4.17-61.18 | 7.06     | 1.6-23.42         | Region       |
| Suriname                           | 18.45 | 4.17-61.18 | 35.43    | 8.01-117.49       | Region       |
| Trinidad and Tobago                | 18.45 | 4.17-61.18 | 97.06    | 21.94-321.84      | Region       |
| Virgin Island (US)                 | 18.45 | 4.17-61.18 | 7.69     | 1.74-25.49        | Region       |
| Latin America, Andean              | 15.15 | 3.22-59.07 | 30945.6  | 6631.97-120267.6  | REGION       |
| Bolivia                            | 15.15 | 3.22-59.07 | 535.15   | 113.74-2086.56    | Super-region |
| Ecuador                            | 15.15 | 3.22-59.07 | 861.79   | 183.17-3360.15    | Super-region |
| Peru                               | 15.15 | 3.22-59.07 | 1708.73  | 363.18-6662.36    | Super-region |
| Latin America, central             | 15.15 | 3.22-59.07 | 30945.6  | 6631.97-120267.6  | REGION       |
| Colombia                           | 15.15 | 3.22-59.07 | 2772.43  | 589.26-10809.72   | Super-region |
| Costa Rica                         | 15.15 | 3.22-59.07 | 280.7    | 59.66-1094.44     | Super-region |
| El Salvador                        | 15.15 | 3.22-59.07 | 350.67   | 74.53-1367.25     | Super-region |
| Guatemala                          | 15.15 | 3.22-59.07 | 789.66   | 167.84-3078.9     | Super-region |
| Honduras                           | 15.15 | 3.22-59.07 | 448.94   | 95.42-1750.42     | Super-region |
| Mexico                             | 15.15 | 3.22-59.07 | 6674.73  | 1418.66-26024.84  | Super-region |
| Nicaragua                          | 15.15 | 3.22-59.07 | 320.7    | 68.16-1250.42     | Super-region |
| Panama                             | 15.15 | 3.22-59.07 | 215.08   | 45.71-838.59      | Super-region |
| Venezuela (Bolivarian Republic of) | 15.15 | 3.22-59.07 | 1428.41  | 303.6-5569.39     | Super-region |

|                                                |       |             |           |                     |              |
|------------------------------------------------|-------|-------------|-----------|---------------------|--------------|
| <b>Latin America, tropical</b>                 | 19.47 | 4.17-66.62  | 15731.84  | 3336.73-54223.8     | REGION       |
| <b>Brazil</b>                                  | 17.76 | 13.69-22.3  | 13965.04  | 10737.6-17627.07    | Country      |
| <b>Paraguay</b>                                | 19.47 | 4.17-66.62  | 424.1     | 90.83-1451.13       | Region       |
| <b>North Africa and Middle East</b>            | 15.81 | 2.77-58.4   | 29136.03  | 5043.75-107293.97   | SUPER-REGION |
| <b>North Africa and the Middle East</b>        | 18.97 | 5.64-47.41  | 34972.99  | 10400.23-87496.35   | REGION       |
| <b>Afghanistan</b>                             | 18.97 | 5.64-47.41  | 1660.52   | 493.69-4149.99      | Region       |
| <b>Algeria</b>                                 | 18.97 | 5.64-47.41  | 2591.69   | 770.54-6477.16      | Region       |
| <b>Bahrain</b>                                 | 18.97 | 5.64-47.41  | 77.57     | 23.06-193.86        | Region       |
| <b>Egypt</b>                                   | 18.97 | 5.64-47.41  | 5607.9    | 1667.29-14015.31    | Region       |
| <b>Iran (Islamic Republic of)</b>              | 18.97 | 5.64-47.41  | 5456.92   | 1622.41-13637.99    | Region       |
| <b>Iraq</b>                                    | 18.97 | 5.64-47.41  | 1985.96   | 590.45-4963.33      | Region       |
| <b>Jordan</b>                                  | 18.97 | 5.64-47.41  | 545.85    | 162.29-1364.19      | Region       |
| <b>Kuwait</b>                                  | 18.97 | 5.64-47.41  | 214.48    | 63.77-536.03        | Region       |
| <b>Lebanon</b>                                 | 18.97 | 5.64-47.41  | 433.13    | 128.77-1082.48      | Region       |
| <b>Libya</b>                                   | 18.97 | 5.64-47.41  | 417.18    | 124.03-1042.63      | Region       |
| <b>Morocco</b>                                 | 18.97 | 5.64-47.41  | 2339.45   | 695.55-5846.78      | Region       |
| <b>Palestine</b>                               | 18.97 | 5.64-47.41  | 247.3     | 73.53-618.06        | Region       |
| <b>Oman</b>                                    | 18.97 | 5.64-47.41  | 200.41    | 59.58-500.87        | Region       |
| <b>Qatar</b>                                   | 18.97 | 5.64-47.41  | 90.47     | 26.9-226.1          | Region       |
| <b>Saudi Arabia</b>                            | 18.97 | 5.64-47.41  | 1774.99   | 527.73-4436.08      | Region       |
| <b>Sudan</b>                                   | 18.97 | 5.64-47.41  | 2080.05   | 618.42-5198.47      | Region       |
| <b>Syrian Arab Republic</b>                    | 18.97 | 5.64-47.41  | 1011.05   | 300.6-2526.82       | Region       |
| <b>Sudan</b>                                   | 18.97 | 5.64-47.41  | 2080.05   | 618.42-5198.47      | Region       |
| <b>Tunisia</b>                                 | 18.97 | 5.64-47.41  | 794.39    | 236.18-1985.34      | Region       |
| <b>Turkey</b>                                  | 14.41 | 9.7-19.65   | 4252.1    | 2846.28-5739.02     | Country      |
| <b>United Arab Emirates</b>                    | 25.39 | 12.54-42.39 | 545.8     | 260.95-940.02       | Country      |
| <b>Yemen</b>                                   | 18.97 | 5.64-47.41  | 1432.46   | 425.89-3580.02      | Region       |
| <b>South Asia</b>                              | 12.38 | 3.36-36.55  | 322880.08 | 87798.88-953808.65  | SUPER-REGION |
| <b>Asia, south</b>                             | 12.38 | 3.36-36.55  | 322880.08 | 87798.88-953808.65  | REGION       |
| <b>Bangladesh</b>                              | 12.38 | 3.36-36.55  | 6469.7    | 1755.91-19100.78    | Global       |
| <b>Bhutan</b>                                  | 12.38 | 3.36-36.55  | 28.82     | 7.82-85.1           | Global       |
| <b>India</b>                                   | 12.38 | 3.36-36.55  | 53467.81  | 14511.46-157855.29  | Global       |
| <b>Nepal</b>                                   | 12.38 | 3.36-36.55  | 1244.9    | 337.87-3675.36      | Global       |
| <b>Pakistan</b>                                | 12.38 | 3.36-36.55  | 7386.36   | 2004.7-21807.06     | Global       |
| <b>South East Asia, east Asia, and Oceania</b> | 16.5  | 2.47-66.16  | 132454.63 | 19833.05-531221.9   | SUPER-REGION |
| <b>Asia, east</b>                              | 19.77 | 3.77-60.67  | 112196.93 | 21342.52-344184.4   | REGION       |
| <b>China</b>                                   | 18.51 | 18.08-18.94 | 103226.89 | 100874.03-105702.02 | Country      |
| <b>Dem. People's Republic of Korea</b>         | 19.77 | 3.77-60.67  | 1928.01   | 367.66-5916.66      | Region       |
| <b>Asia, South East</b>                        | 16.5  | 2.47-66.16  | 132454.63 | 19833.05-531221.9   | REGION       |
| <b>Cambodia</b>                                | 16.5  | 2.47-66.16  | 874.2     | 130.87-3505.29      | Super-region |
| <b>Indonesia</b>                               | 16.5  | 2.47-66.16  | 14828.07  | 2219.72-59456.05    | Super-region |
| <b>Lao People's Democratic Republic</b>        | 16.5  | 2.47-66.16  | 351.99    | 52.69-1411.39       | Super-region |
| <b>Malaysia</b>                                | 16.5  | 2.47-66.16  | 1775.19   | 265.74-7117.96      | Super-region |
| <b>Maldives</b>                                | 16.5  | 2.47-66.16  | 22.03     | 3.3-88.35           | Super-region |
| <b>Mauritius</b>                               | 16.5  | 2.47-66.16  | 81.36     | 12.18-326.24        | Super-region |
| <b>Myanmar</b>                                 | 16.5  | 2.47-66.16  | 3097.56   | 463.7-12420.28      | Super-region |
| <b>Philippines</b>                             | 16.5  | 2.47-66.16  | 5519.14   | 826.2-22130.06      | Super-region |
| <b>Seychelles</b>                              | 16.5  | 2.47-66.16  | 5.51      | 0.82-22.08          | Super-region |
| <b>Sri Lanka</b>                               | 16.5  | 2.47-66.16  | 1287.83   | 192.78-5163.8       | Super-region |
| <b>Thailand</b>                                | 16.5  | 2.47-66.16  | 4634.01   | 693.7-18580.96      | Super-region |
| <b>Timor-Leste</b>                             | 16.5  | 2.47-66.16  | 55.81     | 8.35-223.76         | Super-region |
| <b>Vietnam</b>                                 | 16.5  | 2.47-66.16  | 5760.66   | 862.35-23098.52     | Super-region |
| <b>Oceania</b>                                 | 16.5  | 2.47-66.16  | 132454.63 | 19833.05-531221.9   | REGION       |
| <b>Fiji</b>                                    | 16.5  | 2.47-66.16  | 46.03     | 6.89-184.55         | Super-region |
| <b>Guam</b>                                    | 16.5  | 2.47-66.16  | 9.45      | 1.42-37.91          | Super-region |
| <b>Kiribati</b>                                | 16.5  | 2.47-66.16  | 5.75      | 0.86-23.07          | Super-region |

|                                  |       |            |           |                    |              |
|----------------------------------|-------|------------|-----------|--------------------|--------------|
| Marshall Islands                 | 16.5  | 2.47-66.16 | 2.26      | 0.34-9.04          | Super-region |
| Micronesia (Fed. States of)      | 16.5  | 2.47-66.16 | 5.53      | 0.83-22.16         | Super-region |
| Papua New Guinea                 | 16.5  | 2.47-66.16 | 397.97    | 59.57-1595.72      | Super-region |
| Samoa                            | 16.5  | 2.47-66.16 | 8.4       | 1.26-33.69         | Super-region |
| Solomon Islands                  | 16.5  | 2.47-66.16 | 28.15     | 4.21-112.86        | Super-region |
| Tonga                            | 16.5  | 2.47-66.16 | 4.89      | 0.73-19.6          | Super-region |
| Vanuatu                          | 16.5  | 2.47-66.16 | 13.23     | 1.98-53.05         | Super-region |
| Sub-Saharan Africa               | 12.38 | 3.36-36.55 | 322880.08 | 87798.88-953808.65 | SUPER-REGION |
| Sub-Saharan Africa, central      | 12.38 | 3.36-36.55 | 322880.08 | 87798.88-953808.65 | REGION       |
| Angola                           | 12.38 | 3.36-36.55 | 895.64    | 243.08-2644.25     | Global       |
| Central African Republic         | 12.38 | 3.36-36.55 | 135.2     | 36.69-399.17       | Global       |
| Congo                            | 12.38 | 3.36-36.55 | 166.89    | 45.3-492.73        | Global       |
| Democratic Republic of the Congo | 12.38 | 3.36-36.55 | 2452.55   | 665.64-7240.77     | Global       |
| Equatorial Guinea                | 12.38 | 3.36-36.55 | 38.16     | 10.36-112.67       | Global       |
| Gabon                            | 12.38 | 3.36-36.55 | 72.53     | 19.69-214.14       | Global       |
| Sub-Saharan Africa, eastern      | 12.38 | 3.36-36.55 | 322880.08 | 87798.88-953808.65 | REGION       |
| Burundi                          | 12.38 | 3.36-36.55 | 335.8     | 91.14-991.41       | Global       |
| Comoros                          | 12.38 | 3.36-36.55 | 27.27     | 7.4-80.51          | Global       |
| Djibouti                         | 12.38 | 3.36-36.55 | 35.99     | 9.77-106.26        | Global       |
| Eritrea                          | 12.38 | 3.36-36.55 | 107.93    | 29.29-318.65       | Global       |
| Ethiopia                         | 12.38 | 3.36-36.55 | 3511.34   | 953-10366.69       | Global       |
| Kenya                            | 12.38 | 3.36-36.55 | 1705.44   | 462.87-5035.04     | Global       |
| Madagascar                       | 12.38 | 3.36-36.55 | 851.66    | 231.15-2514.4      | Global       |
| Malawi                           | 12.38 | 3.36-36.55 | 560.64    | 152.16-1655.21     | Global       |
| Mozambique                       | 12.38 | 3.36-36.55 | 918.51    | 249.29-2711.74     | Global       |
| Rwanda                           | 12.38 | 3.36-36.55 | 415.58    | 112.79-1226.93     | Global       |
| Somalia                          | 12.38 | 3.36-36.55 | 423.5     | 114.94-1250.31     | Global       |
| South Sudan                      | 12.38 | 3.36-36.55 | 335.69    | 91.11-991.06       | Global       |
| Uganda                           | 12.38 | 3.36-36.55 | 1255.92   | 340.86-3707.9      | Global       |
| United Republic of Tanzania      | 12.38 | 3.36-36.55 | 1712.06   | 464.66-5054.59     | Global       |
| Zambia                           | 12.38 | 3.36-36.55 | 521.53    | 141.55-1539.75     | Global       |
| Sub-Saharan Africa, southern     | 12.38 | 3.36-36.55 | 322880.08 | 87798.88-953808.65 | REGION       |
| Botswana                         | 12.38 | 3.36-36.55 | 88.25     | 23.95-260.53       | Global       |
| Lesotho                          | 12.38 | 3.36-36.55 | 78.22     | 21.23-230.94       | Global       |
| Namibia                          | 12.38 | 3.36-36.55 | 88.9      | 24.13-262.46       | Global       |
| South Africa                     | 12.38 | 3.36-36.55 | 2377.85   | 645.36-7020.23     | Global       |
| Eswatini                         | 12.38 | 3.36-36.55 | 38.41     | 10.42-113.39       | Global       |
| Zimbabwe                         | 12.38 | 3.36-36.55 | 476.17    | 129.23-1405.81     | Global       |
| Sub-Saharan Africa, western      | 12.38 | 3.36-36.55 | 322880.08 | 87798.88-953808.65 | REGION       |
| Benin                            | 12.38 | 3.36-36.55 | 362.18    | 98.3-1069.28       | Global       |
| Burkina Faso                     | 12.38 | 3.36-36.55 | 590.87    | 160.36-1744.44     | Global       |
| Cote d'Ivoire                    | 12.38 | 3.36-36.55 | 764.85    | 207.59-2258.11     | Global       |
| Cameroon                         | 12.38 | 3.36-36.55 | 781.76    | 212.17-2308.01     | Global       |
| Cabo Verde                       | 12.38 | 3.36-36.55 | 21.71     | 5.89-64.11         | Global       |
| Chad                             | 12.38 | 3.36-36.55 | 433.12    | 117.55-1278.71     | Global       |
| Gambia                           | 12.38 | 3.36-36.55 | 69.79     | 18.94-206.05       | Global       |
| Ghana                            | 12.38 | 3.36-36.55 | 1007.97   | 273.57-2975.87     | Global       |
| Guinea                           | 12.38 | 3.36-36.55 | 399.17    | 108.34-1178.48     | Global       |
| Guinea-Bissau                    | 12.38 | 3.36-36.55 | 60.9      | 16.53-179.81       | Global       |
| Liberia                          | 12.38 | 3.36-36.55 | 153.88    | 41.76-454.3        | Global       |
| Mali                             | 12.38 | 3.36-36.55 | 534.41    | 145.04-1577.75     | Global       |
| Mauritania                       | 12.38 | 3.36-36.55 | 145.48    | 39.48-429.49       | Global       |
| Niger                            | 12.38 | 3.36-36.55 | 598.66    | 162.48-1767.44     | Global       |
| Nigeria                          | 12.38 | 3.36-36.55 | 5829.77   | 1582.23-17211.49   | Global       |
| Sao Tome and Principe            | 12.38 | 3.36-36.55 | 6.42      | 1.74-18.95         | Global       |
| Senegal                          | 12.38 | 3.36-36.55 | 517.5     | 140.45-1527.83     | Global       |
| Sierra Leone                     | 12.38 | 3.36-36.55 | 241.89    | 65.65-714.16       | Global       |
| Togo                             | 12.38 | 3.36-36.55 | 252.38    | 68.5-745.11        | Global       |

**Table S17. Estimated period prevalence of SLE diagnosed by physician/dermatologist for the overall population.**

| Country/Region/Super-region                      | Expected Prevalence | 95% Confidence Interval of Prevalence | Expected Patient Number | 95% Confidence Interval of Patient Number | Hierarchy of Region in Estimate |
|--------------------------------------------------|---------------------|---------------------------------------|-------------------------|-------------------------------------------|---------------------------------|
| Global                                           | 43.7                | 15.87-108.92                          | 3405958.6               | 1238549.72-8490061.52                     | GLOBAL                          |
| Central Europe, eastern Europe, and central Asia | 34.16               | 11.67-70.96                           | 142598.64               | 48849.05-295740.4                         | SUPER-REGION                    |
| Asia, central                                    | 22.21               | 6.62-55.29                            | 21039.88                | 6326.65-52398.05                          | REGION                          |
| Armenia                                          | 22.21               | 6.62-55.29                            | 658.09                  | 196.15-1638.25                            | Region                          |
| Azerbaijan                                       | 22.21               | 6.62-55.29                            | 2251.89                 | 671.21-5605.89                            | Region                          |
| Georgia                                          | 22.21               | 6.62-55.29                            | 885.97                  | 264.08-2205.55                            | Region                          |
| Kazakhstan                                       | 14.15               | 10.63-18.34                           | 2655.22                 | 1999.92-3441.18                           | Country                         |
| Kyrgyzstan                                       | 22.21               | 6.62-55.29                            | 1449.01                 | 431.9-3607.19                             | Region                          |
| Mongolia                                         | 22.21               | 6.62-55.29                            | 728.1                   | 217.02-1812.55                            | Region                          |
| Tajikistan                                       | 22.21               | 6.62-55.29                            | 2118.31                 | 631.39-5273.35                            | Region                          |
| Turkmenistan                                     | 22.21               | 6.62-55.29                            | 1339.51                 | 399.26-3334.6                             | Region                          |
| Uzbekistan                                       | 22.21               | 6.62-55.29                            | 7433.4                  | 2215.63-18504.86                          | Region                          |
| Europe, central                                  | 48.68               | 13.54-130.3                           | 55324.9                 | 15505.65-147412.9                         | REGION                          |
| Albania                                          | 48.68               | 13.54-130.3                           | 1400.89                 | 389.65-3749.71                            | Region                          |
| Bosnia and Herzegovina                           | 48.68               | 13.54-130.3                           | 1597.03                 | 444.2-4274.7                              | Region                          |
| Bulgaria                                         | 48.68               | 13.54-130.3                           | 3382.42                 | 940.8-9053.59                             | Region                          |
| Croatia                                          | 48.68               | 13.54-130.3                           | 1998.33                 | 555.82-5348.86                            | Region                          |
| Czechia                                          | 48.68               | 13.54-130.3                           | 5212.94                 | 1449.94-13953.3                           | Region                          |
| Hungary                                          | 59.64               | 59.12-60.22                           | 5760.81                 | 5599.95-5914.05                           | Country                         |
| Montenegro                                       | 48.68               | 13.54-130.3                           | 305.73                  | 85.04-818.35                              | Region                          |
| Poland                                           | 48.68               | 13.54-130.3                           | 18421.28                | 5123.75-49307.58                          | Region                          |
| Romania                                          | 48.68               | 13.54-130.3                           | 9364.34                 | 2604.62-25065.19                          | Region                          |
| Serbia                                           | 48.68               | 13.54-130.3                           | 4253.3                  | 1183.03-11384.65                          | Region                          |
| Slovakia                                         | 48.68               | 13.54-130.3                           | 2657.67                 | 739.21-7113.7                             | Region                          |
| Slovenia                                         | 48.68               | 13.54-130.3                           | 1011.93                 | 281.46-2708.6                             | Region                          |
| North Macedonia                                  | 48.68               | 13.54-130.3                           | 1014.18                 | 282.09-2714.63                            | Region                          |
| Europe, eastern                                  | 34.23               | 10.11-99.72                           | 56889.21                | 16912.93-142046.35                        | REGION                          |
| Belarus                                          | 34.23               | 10.11-99.72                           | 3234.37                 | 955.29-9422.47                            | Region                          |
| Estonia                                          | 73.64               | 20.54-222.81                          | 785.8                   | 204.98-1974.3                             | Country                         |
| Latvia                                           | 34.23               | 10.11-99.72                           | 645.46                  | 190.64-1880.36                            | Region                          |
| Lithuania                                        | 64.69               | 17.93-199.81                          | 1419.52                 | 361.9-3698.3                              | Country                         |
| Republic of Moldova                              | 34.23               | 10.11-99.72                           | 1380.8                  | 407.83-4022.59                            | Region                          |
| Russia                                           | 10.36               | 2.87-32.26                            | 12165.11                | 3305.5-32116.48                           | Country                         |
| Ukraine                                          | 17.62               | 4.59-55.08                            | 6228.98                 | 1544.55-16887.12                          | Country                         |
| High income                                      | 33.18               | 13.6-59.03                            | 359905.85               | 148070.72-641088.85                       | SUPER-REGION                    |
| Asia Pacific, high income                        | 31.38               | 12.12-60.83                           | 57733.39                | 22387.1-111646.3                          | REGION                          |
| Brunei Darussalam                                | 31.38               | 12.12-60.83                           | 137.28                  | 53.02-266.12                              | Region                          |
| Japan                                            | 26.27               | 23.44-29.11                           | 33210.17                | 29608.8-36868.6                           | Country                         |
| Republic of Korea                                | 26.29               | 26.13-26.47                           | 13475.94                | 13216.95-13722.02                         | Country                         |
| Singapore                                        | 31.38               | 12.12-60.83                           | 1835.6                  | 708.97-3558.31                            | Region                          |
| Australasia                                      | 22.12               | 5.88-54                               | 6705.65                 | 1795.38-16368.95                          | REGION                          |
| Australia                                        | 10.73               | 8.47-13.26                            | 2735.55                 | 2144-3389                                 | Country                         |
| New Zealand                                      | 22.12               | 5.88-54                               | 1066.52                 | 283.51-2603.63                            | Region                          |
| Europe, western                                  | 60                  | 38.03-87.17                           | 260467.67               | 165543.92-378755.4                        | REGION                          |
| Austria                                          | 60                  | 38.03-87.17                           | 5403.15                 | 3424.69-7849.87                           | Region                          |
| Belgium                                          | 60                  | 38.03-87.17                           | 6952.64                 | 4406.81-10101.03                          | Region                          |
| Cyprus                                           | 60                  | 38.03-87.17                           | 724.36                  | 459.12-1052.37                            | Region                          |
| Denmark                                          | 61.65               | 59.04-64.05                           | 3570.69                 | 3374.98-3754                              | Country                         |
| Finland                                          | 60                  | 38.03-87.17                           | 3323.85                 | 2106.76-4828.99                           | Region                          |
| France                                           | 40.29               | 39.76-40.86                           | 26290.67                | 25791-26748.15                            | Country                         |
| Germany                                          | 29.09               | 28.49-29.74                           | 24362.17                | 23774.92-24969.28                         | Country                         |

|                                    |        |               |           |                      |              |
|------------------------------------|--------|---------------|-----------|----------------------|--------------|
| Greece                             | 39.55  | 37.15-42      | 4122.16   | 3841.92-4403.02      | Country      |
| Iceland                            | 60     | 38.03-87.17   | 204.72    | 129.76-297.42        | Region       |
| Ireland                            | 60     | 38.03-87.17   | 2962.29   | 1877.6-4303.72       | Region       |
| Israel                             | 60     | 38.03-87.17   | 5192.58   | 3291.23-7543.95      | Region       |
| Italy                              | 59.09  | 52.55-66.21   | 35715.47  | 31720.7-39933.2      | Country      |
| Luxembourg                         | 60     | 38.03-87.17   | 375.55    | 238.03-545.61        | Region       |
| Malta                              | 40.36  | 32.96-48.23   | 178.05    | 139-223.02           | Country      |
| Netherlands                        | 111.85 | 86.56-141.5   | 19159.27  | 14819.3-24279.07     | Country      |
| Norway                             | 88.91  | 79.43-99.09   | 4817.72   | 4305.87-5388.3       | Country      |
| Portugal                           | 60     | 38.03-87.17   | 6116.85   | 3877.06-8886.76      | Region       |
| Spain                              | 74.93  | 67.7-82.82    | 35023.53  | 31637.85-38634.65    | Country      |
| Sweden                             | 140.5  | 136.65-144.18 | 14184.29  | 13743.95-14612.03    | Country      |
| Switzerland                        | 60     | 38.03-87.17   | 5191.75   | 3290.71-7542.75      | Region       |
| United Kingdom                     | 104.23 | 102.14-106.33 | 70739.38  | 69257.07-72330.25    | Country      |
| Latin America, southern            | 16.76  | 3.03-47.69    | 11353.25  | 2051.28-32250.12     | REGION       |
| Argentina                          | 5.05   | 4.22-6.06     | 2279.06   | 1869.97-2733.1       | Country      |
| Chile                              | 16.76  | 3.03-47.69    | 3203.25   | 579.11-9114.74       | Region       |
| Uruguay                            | 16.76  | 3.03-47.69    | 581.84    | 105.19-1655.6        | Region       |
| North America, high income         | 40.31  | 15.81-83.14   | 148580.83 | 58465.12-306124.27   | REGION       |
| Canada                             | 28.52  | 27.87-29.22   | 10760.68  | 10432.97-11090.2     | Country      |
| United States of America           | 53.9   | 53.17-54.6    | 178362.23 | 175775.6-180865.33   | Country      |
| Latin America and Caribbean        | 71.57  | 25.63-174.15  | 418236.62 | 150008.55-1018404.35 | SUPER-REGION |
| Caribbean                          | 91.02  | 23.73-245.97  | 53907.62  | 21238.08-114445.92   | REGION       |
| Antigua and Barbuda                | 91.02  | 23.73-245.97  | 89.13     | 23.24-240.86         | Region       |
| Bahamas                            | 91.02  | 23.73-245.97  | 357.93    | 93.32-967.25         | Region       |
| Barbados                           | 163.31 | 35.41-391.57  | 578.48    | 524.98-634.03        | Country      |
| Belize                             | 91.02  | 23.73-245.97  | 361.9     | 94.35-978            | Region       |
| Cuba                               | 149.9  | 26.05-424.12  | 21552.1   | 8301.98-44440.52     | Country      |
| Dominican Republic                 | 91.02  | 23.73-245.97  | 9871.58   | 2573.64-26676.69     | Region       |
| Grenada                            | 91.02  | 23.73-245.97  | 102.41    | 26.7-276.76          | Region       |
| Guyana                             | 91.02  | 23.73-245.97  | 715.81    | 186.62-1934.38       | Region       |
| Haiti                              | 91.02  | 23.73-245.97  | 10378.29  | 2705.74-28046        | Region       |
| Jamaica                            | 91.02  | 23.73-245.97  | 2695.05   | 702.63-7283.04       | Region       |
| Puerto Rico                        | 111.96 | 24.09-270.68  | 3952.53   | 3678.98-4219.05      | Country      |
| Saint Lucia                        | 91.02  | 23.73-245.97  | 167.11    | 43.57-451.59         | Region       |
| Saint Vincent and the Grenadines   | 91.02  | 23.73-245.97  | 100.98    | 26.33-272.88         | Region       |
| Suriname                           | 91.02  | 23.73-245.97  | 533.93    | 139.2-1442.89        | Region       |
| Trinidad and Tobago                | 91.02  | 23.73-245.97  | 1273.74   | 332.08-3442.11       | Region       |
| Virgin Island (US)                 | 91.02  | 23.73-245.97  | 95.04     | 24.78-256.82         | Region       |
| Latin America, Andean              | 74.97  | 16.16-199.1   | 46688.97  | 10001.3-123892.32    | REGION       |
| Bolivia                            | 74.97  | 16.16-199.1   | 8750.14   | 1886.12-23237.99     | Region       |
| Ecuador                            | 68.1   | 20.9-150.79   | 12011.7   | 3668.9-26732.4       | Country      |
| Peru                               | 74.97  | 16.16-199.1   | 24717.88  | 5328.01-65643.99     | Region       |
| Latin America, central             | 56.28  | 23.78-108.07  | 145511.71 | 61317.33-278947.47   | REGION       |
| Colombia                           | 16.51  | 16.24-16.8    | 8397.04   | 8166.92-8622         | Country      |
| Costa Rica                         | 56.28  | 23.78-108.07  | 2866.61   | 1211.23-5504.53      | Region       |
| El Salvador                        | 56.28  | 23.78-108.07  | 3650.3    | 1542.36-7009.38      | Region       |
| Guatemala                          | 56.28  | 23.78-108.07  | 10082.62  | 4260.21-19360.85     | Region       |
| Honduras                           | 56.28  | 23.78-108.07  | 5574.04   | 2355.2-10703.38      | Region       |
| Mexico                             | 112.87 | 66.11-170.08  | 145504.49 | 84964.38-220269.47   | Country      |
| Nicaragua                          | 56.28  | 23.78-108.07  | 3728.07   | 1575.22-7158.71      | Region       |
| Panama                             | 56.28  | 23.78-108.07  | 2427.73   | 1025.79-4661.78      | Region       |
| Venezuela (Bolivarian Republic of) | 71.87  | 22.41-159.9   | 20434.13  | 6395.58-45344.45     | Country      |
| Latin America, tropical            | 110.85 | 26.74-314.1   | 243508.34 | 58981.25-688896.22   | REGION       |
| Brazil                             | 147.58 | 34.87-352.14  | 313657.2  | 74106.22-750041.37   | Country      |

|                                         |        |               |            |                      |              |
|-----------------------------------------|--------|---------------|------------|----------------------|--------------|
| Paraguay                                | 110.85 | 26.74-314.1   | 7906.05    | 1907.15-22402.27     | Region       |
| North Africa and Middle East            | 58.49  | 14.84-149.23  | 363350.41  | 91679.05-926033.65   | SUPER-REGION |
| North Africa and the Middle East        | 67.78  | 30.44-123.7   | 421088.99  | 188554.3-769198.62   | REGION       |
| Afghanistan                             | 67.78  | 30.44-123.7   | 26385.6    | 11849.78-48154.31    | Region       |
| Algeria                                 | 67.78  | 30.44-123.7   | 29721.58   | 13347.96-54242.55    | Region       |
| Bahrain                                 | 67.78  | 30.44-123.7   | 1153.33    | 517.96-2104.85       | Region       |
| Egypt                                   | 67.78  | 30.44-123.7   | 69361.6    | 31150.3-126586.46    | Region       |
| Iran (Islamic Republic of)              | 72.67  | 46.72-103.72  | 61034.43   | 39035-87226.45       | Country      |
| Iraq                                    | 67.78  | 30.44-123.7   | 27262.7    | 12243.68-49755.03    | Region       |
| Jordan                                  | 67.78  | 30.44-123.7   | 6915.67    | 3105.83-12621.25     | Region       |
| Kuwait                                  | 67.78  | 30.44-123.7   | 2894.59    | 1299.96-5282.69      | Region       |
| Lebanon                                 | 67.78  | 30.44-123.7   | 4626.18    | 2077.62-8442.89      | Region       |
| Libya                                   | 67.78  | 30.44-123.7   | 4657.34    | 2091.61-8499.74      | Region       |
| Morocco                                 | 67.78  | 30.44-123.7   | 25017.93   | 11235.56-45658.28    | Region       |
| Palestine                               | 67.78  | 30.44-123.7   | 3457.73    | 1552.87-6310.44      | Region       |
| Oman                                    | 67.78  | 30.44-123.7   | 3461.12    | 1554.39-6316.63      | Region       |
| Qatar                                   | 67.78  | 30.44-123.7   | 1952.72    | 876.97-3563.76       | Region       |
| Saudi Arabia                            | 48.16  | 15.3-107.1    | 16766.73   | 5375.8-37316.85      | Country      |
| Sudan                                   | 67.78  | 30.44-123.7   | 29720.84   | 13347.63-54241.2     | Region       |
| Syrian Arab Republic                    | 67.78  | 30.44-123.7   | 11861.83   | 5327.15-21648.11     | Region       |
| Sudan                                   | 67.78  | 30.44-123.7   | 29720.84   | 13347.63-54241.2     | Region       |
| Tunisia                                 | 67.78  | 30.44-123.7   | 8010.49    | 3597.51-14619.32     | Region       |
| Turkey                                  | 50.29  | 46.62-54.33   | 42413.87   | 39260.6-45941.88     | Country      |
| United Arab Emirates                    | 166.92 | 139.01-198.54 | 16505.98   | 13735.8-19672.25     | Country      |
| Yemen                                   | 67.78  | 30.44-123.7   | 20215.99   | 9079-36894.63        | Region       |
| South Asia                              | 25.8   | 4.21-71.95    | 463245.95  | 75684.55-1291691     | SUPER-REGION |
| Asia, south                             | 15.9   | 3.29-45.85    | 285496.17  | 58918.53-823532.3    | REGION       |
| Bangladesh                              | 15.9   | 3.29-45.85    | 26184.7    | 5418.09-75507.45     | Region       |
| Bhutan                                  | 15.9   | 3.29-45.85    | 122.68     | 25.38-353.75         | Region       |
| India                                   | 7.48   | 3.56-13.11    | 103175.44  | 49043.2-180921.27    | Country      |
| Nepal                                   | 15.9   | 3.29-45.85    | 4632.74    | 958.6-13359.18       | Region       |
| Pakistan                                | 15.9   | 3.29-45.85    | 35121.75   | 7267.33-101278.75    | Region       |
| South East Asia, east Asia, and Oceania | 53.31  | 12.64-173.71  | 1169741.58 | 277990.75-3812053.47 | SUPER-REGION |
| Asia, east                              | 56.32  | 14.14-165.17  | 843087.86  | 211916.65-2473892.47 | REGION       |
| China                                   | 47.53  | 47.15-47.96   | 699191.16  | 693512.42-705521.17  | Country      |
| Dem. People's Republic of Korea         | 56.32  | 14.14-165.17  | 14518.48   | 3645.09-42578.43     | Region       |
| Asia, South East                        | 53.31  | 12.64-173.71  | 1169741.58 | 277990.75-3812053.47 | REGION       |
| Cambodia                                | 53.31  | 12.64-173.71  | 8912.86    | 2113.27-29042.46     | Super-region |
| Indonesia                               | 53.31  | 12.64-173.71  | 145814.61  | 34573.19-475135.17   | Super-region |
| Lao People's Democratic Republic        | 53.31  | 12.64-173.71  | 3878.59    | 919.63-12638.33      | Super-region |
| Malaysia                                | 53.31  | 12.64-173.71  | 17253.73   | 4090.92-56221.07     | Super-region |
| Maldives                                | 53.31  | 12.64-173.71  | 288.16     | 68.32-938.96         | Super-region |
| Mauritius                               | 53.31  | 12.64-173.71  | 677.92     | 160.74-2208.98       | Super-region |
| Myanmar                                 | 53.31  | 12.64-173.71  | 29005.74   | 6877.37-94514.87     | Super-region |
| Philippines                             | 53.31  | 12.64-173.71  | 58416.72   | 13850.82-190350.18   | Super-region |
| Seychelles                              | 53.31  | 12.64-173.71  | 52.42      | 12.43-170.82         | Super-region |
| Sri Lanka                               | 53.31  | 12.64-173.71  | 11415.1    | 2706.56-37195.96     | Super-region |
| Thailand                                | 53.31  | 12.64-173.71  | 37205.7    | 8821.61-121234.31    | Super-region |
| Timor-Leste                             | 53.31  | 12.64-173.71  | 702.86     | 166.65-2290.26       | Super-region |
| Vietnam                                 | 53.31  | 12.64-173.71  | 51878.48   | 12300.58-169045.42   | Super-region |
| Oceania                                 | 53.31  | 12.64-173.71  | 1169741.58 | 277990.75-3812053.47 | REGION       |
| Fiji                                    | 53.31  | 12.64-173.71  | 477.89     | 113.31-1557.21       | Super-region |
| Guam                                    | 53.31  | 12.64-173.71  | 89.97      | 21.33-293.17         | Super-region |
| Kiribati                                | 53.31  | 12.64-173.71  | 63.68      | 15.1-207.49          | Super-region |
| Marshall Islands                        | 53.31  | 12.64-173.71  | 29.76      | 7.06-96.96           | Super-region |

|                                  |       |              |           |                       |              |
|----------------------------------|-------|--------------|-----------|-----------------------|--------------|
| Micronesia (Fed. States of)      | 53.31 | 12.64-173.71 | 61.32     | 14.54-199.8           | Super-region |
| Papua New Guinea                 | 53.31 | 12.64-173.71 | 4769.66   | 1130.9-15541.88       | Super-region |
| Samoa                            | 53.31 | 12.64-173.71 | 105.77    | 25.08-344.66          | Super-region |
| Solomon Islands                  | 53.31 | 12.64-173.71 | 366.17    | 86.82-1193.17         | Super-region |
| Tonga                            | 53.31 | 12.64-173.71 | 56.35     | 13.36-183.61          | Super-region |
| Vanuatu                          | 53.31 | 12.64-173.71 | 163.74    | 38.82-533.55          | Super-region |
| Sub-Saharan Africa               | 43.7  | 15.87-108.92 | 3405958.6 | 1238549.72-8490061.52 | SUPER-REGION |
| Sub-Saharan Africa, central      | 43.7  | 15.87-108.92 | 3405958.6 | 1238549.72-8490061.52 | REGION       |
| Angola                           | 43.7  | 15.87-108.92 | 14362.54  | 5215.87-35797.9       | Global       |
| Central African Republic         | 43.7  | 15.87-108.92 | 2110.61   | 766.48-5260.58        | Global       |
| Congo                            | 43.7  | 15.87-108.92 | 2411.41   | 875.72-6010.31        | Global       |
| Democratic Republic of the Congo | 43.7  | 15.87-108.92 | 39138.26  | 14213.37-97550.09     | Global       |
| Equatorial Guinea                | 43.7  | 15.87-108.92 | 613.1     | 222.65-1528.13        | Global       |
| Gabon                            | 43.7  | 15.87-108.92 | 972.64    | 353.22-2424.26        | Global       |
| Sub-Saharan Africa, eastern      | 43.7  | 15.87-108.92 | 3405958.6 | 1238549.72-8490061.52 | REGION       |
| Burundi                          | 43.7  | 15.87-108.92 | 5196.26   | 1887.06-12951.42      | Global       |
| Comoros                          | 43.7  | 15.87-108.92 | 380.01    | 138-947.16            | Global       |
| Djibouti                         | 43.7  | 15.87-108.92 | 431.76    | 156.8-1076.13         | Global       |
| Eritrea                          | 43.7  | 15.87-108.92 | 1549.78   | 562.81-3862.74        | Global       |
| Ethiopia                         | 43.7  | 15.87-108.92 | 50238.89  | 18244.65-125217.85    | Global       |
| Kenya                            | 43.7  | 15.87-108.92 | 23498.05  | 8533.5-58567.69       | Global       |
| Madagascar                       | 43.7  | 15.87-108.92 | 12100.92  | 4394.54-30160.92      | Global       |
| Malawi                           | 43.7  | 15.87-108.92 | 8359.79   | 3035.92-20836.34      | Global       |
| Mozambique                       | 43.7  | 15.87-108.92 | 13658.62  | 4960.24-34043.41      | Global       |
| Rwanda                           | 43.7  | 15.87-108.92 | 5660.11   | 2055.51-14107.54      | Global       |
| Somalia                          | 43.7  | 15.87-108.92 | 6945.32   | 2522.25-17310.85      | Global       |
| South Sudan                      | 43.7  | 15.87-108.92 | 4891.65   | 1776.44-12192.18      | Global       |
| Uganda                           | 43.7  | 15.87-108.92 | 19988.81  | 7259.1-49821.09       | Global       |
| United Republic of Tanzania      | 43.7  | 15.87-108.92 | 26103.85  | 9479.82-65062.5       | Global       |
| Zambia                           | 43.7  | 15.87-108.92 | 8033.79   | 2917.53-20023.8       | Global       |
| Sub-Saharan Africa, southern     | 43.7  | 15.87-108.92 | 3405958.6 | 1238549.72-8490061.52 | REGION       |
| Botswana                         | 43.7  | 15.87-108.92 | 1027.66   | 373.2-2561.39         | Global       |
| Lesotho                          | 43.7  | 15.87-108.92 | 936.16    | 339.97-2333.33        | Global       |
| Namibia                          | 43.7  | 15.87-108.92 | 1110.38   | 403.24-2767.56        | Global       |
| South Africa                     | 43.7  | 15.87-108.92 | 25917.87  | 9412.28-64598.97      | Global       |
| Eswatini                         | 43.7  | 15.87-108.92 | 506.99    | 184.12-1263.65        | Global       |
| Zimbabwe                         | 43.7  | 15.87-108.92 | 6495.09   | 2358.74-16188.68      | Global       |
| Sub-Saharan Africa, western      | 43.7  | 15.87-108.92 | 3405958.6 | 1238549.72-8490061.52 | REGION       |
| Benin                            | 43.7  | 15.87-108.92 | 5297.82   | 1923.94-13204.54      | Global       |
| Burkina Faso                     | 43.7  | 15.87-108.92 | 9134.73   | 3317.35-22767.85      | Global       |
| Cote d'Ivoire                    | 43.7  | 15.87-108.92 | 11527.3   | 4186.23-28731.21      | Global       |
| Cameroon                         | 43.7  | 15.87-108.92 | 11600.54  | 4212.83-28913.75      | Global       |
| Cabo Verde                       | 43.7  | 15.87-108.92 | 242.96    | 88.23-605.58          | Global       |
| Chad                             | 43.7  | 15.87-108.92 | 7178.09   | 2606.78-17891.02      | Global       |
| Gambia                           | 43.7  | 15.87-108.92 | 1056.08   | 383.52-2632.23        | Global       |
| Ghana                            | 43.7  | 15.87-108.92 | 13578.87  | 4931.27-33844.64      | Global       |
| Guinea                           | 43.7  | 15.87-108.92 | 5739.03   | 2084.17-14304.23      | Global       |
| Guinea-Bissau                    | 43.7  | 15.87-108.92 | 860.02    | 312.32-2143.54        | Global       |
| Liberia                          | 43.7  | 15.87-108.92 | 2210.2    | 802.65-5508.82        | Global       |
| Mali                             | 43.7  | 15.87-108.92 | 8849.61   | 3213.81-22057.2       | Global       |
| Mauritania                       | 43.7  | 15.87-108.92 | 2031.9    | 737.9-5064.4          | Global       |
| Niger                            | 43.7  | 15.87-108.92 | 10578.3   | 3841.59-26365.86      | Global       |

|                       |      |              |          |                    |        |
|-----------------------|------|--------------|----------|--------------------|--------|
| Nigeria               | 43.7 | 15.87-108.92 | 90082.99 | 32714.35-224527.21 | Global |
| Sao Tome and Principe | 43.7 | 15.87-108.92 | 95.77    | 34.78-238.71       | Global |
| Senegal               | 43.7 | 15.87-108.92 | 7317.09  | 2657.26-18237.48   | Global |
| Sierra Leone          | 43.7 | 15.87-108.92 | 3485.94  | 1265.94-8688.51    | Global |
| Togo                  | 43.7 | 15.87-108.92 | 3617.81  | 1313.84-9017.2     | Global |

**Table S18. Estimated adult period prevalence of SLE diagnosed by physician/dermatologist.**

| Country/Region/Super-region                      | Expected Prevalence | 95% Confidence Interval of Prevalence | Expected Patient Number | 95% Confidence Interval of Patient Number | Hierarchy of Region in Estimate |
|--------------------------------------------------|---------------------|---------------------------------------|-------------------------|-------------------------------------------|---------------------------------|
| Global                                           | 61.08               | 22.18-151.87                          | 3174949.11              | 1153235.05-7896862.42                     | GLOBAL                          |
| Central Europe, eastern Europe, and central Asia | 43.51               | 14.86-90.34                           | 136315.16               | 46553.5-282918.05                         | SUPER-REGION                    |
| Asia, central                                    | 32.17               | 9.58-80.05                            | 19475.62                | 5784.68-48630.05                          | REGION                          |
| Armenia                                          | 32.17               | 9.58-80.05                            | 699.77                  | 208.39-1741.27                            | Region                          |
| Azerbaijan                                       | 32.17               | 9.58-80.05                            | 2289.72                 | 681.86-5697.62                            | Region                          |
| Georgia                                          | 32.17               | 9.58-80.05                            | 953.79                  | 284.03-2373.35                            | Region                          |
| Kazakhstan                                       | 20.27               | 15.21-26.2                            | 2470.83                 | 1842.95-3231                              | Country                         |
| Kyrgyzstan                                       | 32.17               | 9.58-80.05                            | 1252.69                 | 373.04-3117.13                            | Region                          |
| Mongolia                                         | 32.17               | 9.58-80.05                            | 656.38                  | 195.47-1633.3                             | Region                          |
| Tajikistan                                       | 32.17               | 9.58-80.05                            | 1663.72                 | 495.44-4139.9                             | Region                          |
| Turkmenistan                                     | 32.17               | 9.58-80.05                            | 1186.89                 | 353.45-2953.4                             | Region                          |
| Uzbekistan                                       | 32.17               | 9.58-80.05                            | 6850.33                 | 2039.98-17045.96                          | Region                          |
| Europe, central                                  | 58.9                | 16.37-157.71                          | 53401.45                | 15043.28-142597.92                        | REGION                          |
| Albania                                          | 58.9                | 16.37-157.71                          | 1285.28                 | 357.22-3441.45                            | Region                          |
| Bosnia and Herzegovina                           | 58.9                | 16.37-157.71                          | 1554.47                 | 432.03-4162.24                            | Region                          |
| Bulgaria                                         | 58.9                | 16.37-157.71                          | 3306.06                 | 918.85-8852.27                            | Region                          |
| Croatia                                          | 58.9                | 16.37-157.71                          | 1950.27                 | 542.04-5222.01                            | Region                          |
| Czechia                                          | 58.9                | 16.37-157.71                          | 5026.3                  | 1396.95-13458.37                          | Region                          |
| Hungary                                          | 71.62               | 71.01-72.29                           | 5573.96                 | 5417.9-5722.03                            | Country                         |
| Montenegro                                       | 58.9                | 16.37-157.71                          | 280.11                  | 77.85-750.02                              | Region                          |
| Poland                                           | 58.9                | 16.37-157.71                          | 17874.72                | 4967.9-47861.16                           | Region                          |
| Romania                                          | 58.9                | 16.37-157.71                          | 8985.88                 | 2497.43-24060.5                           | Region                          |
| Serbia                                           | 58.9                | 16.37-157.71                          | 4053.33                 | 1126.54-10853.15                          | Region                          |
| Slovakia                                         | 58.9                | 16.37-157.71                          | 2560.61                 | 711.67-6856.27                            | Region                          |
| Slovenia                                         | 58.9                | 16.37-157.71                          | 984.92                  | 273.74-2637.22                            | Region                          |
| North Macedonia                                  | 58.9                | 16.37-157.71                          | 955.57                  | 265.58-2558.63                            | Region                          |
| Europe, eastern                                  | 42.48               | 12.55-123.74                          | 54735.46                | 16373.4-136783.2                          | REGION                          |
| Belarus                                          | 42.48               | 12.55-123.74                          | 3133.41                 | 925.71-9127.32                            | Region                          |
| Estonia                                          | 90.09               | 25.14-272.52                          | 758.68                  | 201.98-1918.07                            | Country                         |
| Latvia                                           | 42.48               | 12.55-123.74                          | 632.59                  | 186.89-1842.67                            | Region                          |
| Lithuania                                        | 78.18               | 21.67-241.4                           | 1374.37                 | 359.95-3557.48                            | Country                         |
| Republic of Moldova                              | 42.48               | 12.55-123.74                          | 1355.34                 | 400.41-3947.98                            | Region                          |
| Russia                                           | 12.96               | 3.59-40.35                            | 11687.67                | 3145.9-30716.07                           | Country                         |
| Ukraine                                          | 21.41               | 5.58-66.9                             | 6020.59                 | 1474.6-16419.52                           | Country                         |
| High income                                      | 40.96               | 16.81-72.91                           | 345687.48               | 142012.6-615267.38                        | SUPER-REGION                    |
| Asia Pacific, high income                        | 36.77               | 14.2-71.26                            | 56070.6                 | 21707.65-108400.45                        | REGION                          |
| Brunei Darussalam                                | 36.77               | 14.2-71.26                            | 112.53                  | 43.46-218.08                              | Region                          |
| Japan                                            | 30.75               | 27.44-34.05                           | 32271.34                | 28741.25-35717                            | Country                         |
| Republic of Korea                                | 30.87               | 30.68-31.08                           | 13079.85                | 12847.95-13308.18                         | Country                         |
| Singapore                                        | 36.77               | 14.2-71.26                            | 1788.77                 | 690.8-3466.63                             | Region                          |
| Australasia                                      | 28.24               | 7.51-68.87                            | 6391.77                 | 1685.48-15706.9                           | REGION                          |
| Australia                                        | 13.69               | 10.8-16.92                            | 2608.77                 | 2074.8-3217.77                            | Country                         |
| New Zealand                                      | 28.24               | 7.51-68.87                            | 1011.36                 | 268.96-2466.44                            | Region                          |
| Europe, western                                  | 73.17               | 46.43-106.41                          | 250896.76               | 158792.82-364368.1                        | REGION                          |
| Austria                                          | 73.17               | 46.43-106.41                          | 5308.38                 | 3368.43-7719.89                           | Region                          |



|                                  |        |               |           |                    |              |
|----------------------------------|--------|---------------|-----------|--------------------|--------------|
| Belgium                          | 73.17  | 46.43-106.41  | 6565.38   | 4166.06-9547.93    | Region       |
| Cyprus                           | 73.17  | 46.43-106.41  | 682.83    | 433.29-993.03      | Region       |
| Denmark                          | 76.04  | 72.82-78.96   | 3429.65   | 3243.98-3610.02    | Country      |
| Finland                          | 73.17  | 46.43-106.41  | 3193.43   | 2026.39-4644.16    | Region       |
| France                           | 50.53  | 49.88-51.24   | 25190.83  | 24759.9-25653.02   | Country      |
| Germany                          | 34.7   | 33.99-35.47   | 23582.9   | 23038.83-24163.2   | Country      |
| Greece                           | 47.11  | 44.26-50.04   | 3990.91   | 3719.95-4276.05    | Country      |
| Iceland                          | 73.17  | 46.43-106.41  | 185.43    | 117.66-269.67      | Region       |
| Ireland                          | 73.17  | 46.43-106.41  | 2631.53   | 1669.84-3827       | Region       |
| Israel                           | 73.17  | 46.43-106.41  | 4081.52   | 2589.93-5935.69    | Region       |
| Italy                            | 69.7   | 62.02-78.14   | 34657.73  | 30721.42-38758.83  | Country      |
| Luxembourg                       | 73.17  | 46.43-106.41  | 361.54    | 229.41-525.78      | Region       |
| Malta                            | 48.19  | 39.37-57.66   | 172.42    | 131.98-214         | Country      |
| Netherlands                      | 137.22 | 106.15-173.59 | 18425.3   | 14272-23365.18     | Country      |
| Norway                           | 110.82 | 99.05-123.5   | 4613.27   | 4134.87-5165.05    | Country      |
| Portugal                         | 73.17  | 46.43-106.41  | 6101.28   | 3871.57-8873       | Region       |
| Spain                            | 89.68  | 81.05-99.12   | 33874.78  | 30540.63-37503.68  | Country      |
| Sweden                           | 174.8  | 169.99-179.34 | 13594.89  | 13164.85-14010.52  | Country      |
| Switzerland                      | 73.17  | 46.43-106.41  | 5072.96   | 3219.04-7377.52    | Region       |
| United Kingdom                   | 129.9  | 127.31-132.55 | 67791.93  | 66320.7-69291.47   | Country      |
| Latin America, southern          | 22.6   | 4.08-64.33    | 10697.3   | 1914.88-30300.5    | REGION       |
| Argentina                        | 6.98   | 5.83-8.36     | 2135.38   | 1759-2600          | Country      |
| Chile                            | 22.6   | 4.08-64.33    | 3207.06   | 578.97-9128.76     | Region       |
| Uruguay                          | 22.6   | 4.08-64.33    | 569.43    | 102.8-1620.85      | Region       |
| North America, high income       | 50.94  | 20.01-105.07  | 141941.02 | 55915.5-292605.07  | REGION       |
| Canada                           | 34.77  | 34-35.64      | 10361.56  | 10052-10684.07     | Country      |
| United States of America         | 68.41  | 67.45-69.33   | 170231.91 | 167882.65-172659.1 | Country      |
| Latin America and Caribbean      | 98.94  | 35.48-240.28  | 391320.74 | 139749.1-950445.5  | SUPER-REGION |
| Caribbean                        | 125.8  | 32.72-340.05  | 50418.65  | 19947.25-107069.97 | REGION       |
| Antigua and Barbuda              | 125.8  | 32.72-340.05  | 87.4      | 22.73-236.25       | Region       |
| Bahamas                          | 125.8  | 32.72-340.05  | 346.95    | 90.24-937.83       | Region       |
| Barbados                         | 204.25 | 44.27-489.46  | 553.3     | 502-605.05         | Country      |
| Belize                           | 125.8  | 32.72-340.05  | 304       | 79.07-821.74       | Region       |
| Cuba                             | 183.85 | 31.96-520.17  | 20726.54  | 8001-42296.27      | Country      |
| Dominican Republic               | 125.8  | 32.72-340.05  | 8693.13   | 2261.04-23498.41   | Region       |
| Grenada                          | 125.8  | 32.72-340.05  | 98.44     | 25.6-266.08        | Region       |
| Guyana                           | 125.8  | 32.72-340.05  | 620.76    | 161.46-1677.98     | Region       |
| Haiti                            | 125.8  | 32.72-340.05  | 8246.06   | 2144.76-22289.92   | Region       |
| Jamaica                          | 125.8  | 32.72-340.05  | 2553.18   | 664.07-6901.51     | Region       |
| Puerto Rico                      | 138.51 | 29.81-334.37  | 3803.85   | 3538.65-4072.02    | Country      |
| Saint Lucia                      | 125.8  | 32.72-340.05  | 172.91    | 44.97-467.4        | Region       |
| Saint Vincent and the Grenadines | 125.8  | 32.72-340.05  | 97.58     | 25.38-263.77       | Region       |
| Suriname                         | 125.8  | 32.72-340.05  | 477.47    | 124.19-1290.66     | Region       |
| Trinidad and Tobago              | 125.8  | 32.72-340.05  | 1294.66   | 336.74-3499.6      | Region       |
| Virgin Island (US)               | 125.8  | 32.72-340.05  | 97.53     | 25.37-263.63       | Region       |
| Latin America, Andean            | 106.49 | 22.92-282.68  | 43285.41  | 9368.85-114689.1   | REGION       |
| Bolivia                          | 106.49 | 22.92-282.68  | 7464.13   | 1606.52-19813.7    | Region       |
| Ecuador                          | 98.63  | 30.25-217.87  | 11093.32  | 3420.95-24657.42   | Country      |
| Peru                             | 106.49 | 22.92-282.68  | 23843.49  | 5131.87-63293.06   | Region       |
| Latin America, central           | 80.24  | 33.84-154.07  | 135194.74 | 56721.98-259552.1  | REGION       |
| Colombia                         | 22.36  | 21.99-22.74   | 7903.35   | 7679.92-8103.05    | Country      |
| Costa Rica                       | 80.24  | 33.84-154.07  | 2944.04   | 1241.61-5652.9     | Region       |
| El Salvador                      | 80.24  | 33.84-154.07  | 3348.67   | 1412.25-6429.83    | Region       |
| Guatemala                        | 80.24  | 33.84-154.07  | 8020.82   | 3382.66-15400.88   | Region       |
| Honduras                         | 80.24  | 33.84-154.07  | 4680.79   | 1974.05-8987.65    | Region       |
| Mexico                           | 160.34 | 93.86-241.8   | 135331.06 | 78866.75-204254.03 | Country      |

|                                         |        |               |            |                     |              |
|-----------------------------------------|--------|---------------|------------|---------------------|--------------|
| Nicaragua                               | 80.24  | 33.84-154.07  | 3263.23    | 1376.22-6265.77     | Region       |
| Panama                                  | 80.24  | 33.84-154.07  | 2257.37    | 952.01-4334.41      | Region       |
| Venezuela (Bolivarian Republic of)      | 104    | 32.5-231.43   | 18912.14   | 5892.55-42023.92    | Country      |
| Latin America, tropical                 | 146.87 | 35.42-415.99  | 230171.68  | 55652.3-652100.37   | REGION       |
| Brazil                                  | 194.84 | 46.07-463.49  | 296747.69  | 70148.25-706283.32  | Country      |
| Paraguay                                | 146.87 | 35.42-415.99  | 6479.93    | 1562.74-18353.56    | Region       |
| North Africa and Middle East            | 87.3   | 22.23-222.69  | 331441.24  | 84549-844645.3      | SUPER-REGION |
| North Africa and the Middle East        | 101.22 | 45.41-184.89  | 384283.81  | 172689.12-702717.3  | REGION       |
| Afghanistan                             | 101.22 | 45.41-184.89  | 18237.83   | 8181.98-33313.5     | Region       |
| Algeria                                 | 101.22 | 45.41-184.89  | 27775.62   | 12460.89-50735.37   | Region       |
| Bahrain                                 | 101.22 | 45.41-184.89  | 1317.47    | 591.05-2406.5       | Region       |
| Egypt                                   | 101.22 | 45.41-184.89  | 59638.28   | 26755.33-108936.2   | Region       |
| Iran (Islamic Republic of)              | 99.16  | 63.6-141.6    | 57202.1    | 36817.6-82000.9     | Country      |
| Iraq                                    | 101.22 | 45.41-184.89  | 21156.35   | 9491.3-38644.5      | Region       |
| Jordan                                  | 101.22 | 45.41-184.89  | 5881.59    | 2638.64-10743.4     | Region       |
| Kuwait                                  | 101.22 | 45.41-184.89  | 3167.18    | 1420.88-5785.23     | Region       |
| Lebanon                                 | 101.22 | 45.41-184.89  | 4593.5     | 2060.77-8390.56     | Region       |
| Libya                                   | 101.22 | 45.41-184.89  | 4453.77    | 1998.08-8135.32     | Region       |
| Morocco                                 | 101.22 | 45.41-184.89  | 24354.23   | 10925.96-44485.8    | Region       |
| Palestine                               | 101.22 | 45.41-184.89  | 2659.44    | 1193.09-4857.77     | Region       |
| Oman                                    | 101.22 | 45.41-184.89  | 3789.2     | 1699.94-6921.41     | Region       |
| Qatar                                   | 101.22 | 45.41-184.89  | 2411.1     | 1081.68-4404.14     | Region       |
| Saudi Arabia                            | 64.65  | 20.55-143.36  | 15516.75   | 4961.82-34497.65    | Country      |
| Sudan                                   | 101.22 | 45.41-184.89  | 21860      | 9806.98-39929.81    | Region       |
| Syrian Arab Republic                    | 101.22 | 45.41-184.89  | 10668.05   | 4785.97-19486.42    | Region       |
| Sudan                                   | 101.22 | 45.41-184.89  | 21860      | 9806.98-39929.81    | Region       |
| Tunisia                                 | 101.22 | 45.41-184.89  | 8260.23    | 3705.76-15088.26    | Region       |
| Turkey                                  | 69.29  | 64.28-74.95   | 39723.68   | 36816.78-42934.37   | Country      |
| United Arab Emirates                    | 194.97 | 162.19-232.01 | 15669.2    | 13073-18692.15      | Country      |
| Yemen                                   | 101.22 | 45.41-184.89  | 15225.72   | 6830.67-27811.54    | Region       |
| South Asia                              | 37.51  | 6.14-104.6    | 426859.98  | 69766.3-1188732.48  | SUPER-REGION |
| Asia, south                             | 23.12  | 4.78-66.66    | 263107.78  | 54542.45-758649.37  | REGION       |
| Bangladesh                              | 23.12  | 4.78-66.66    | 24284.46   | 5020.75-70017.4     | Region       |
| Bhutan                                  | 23.12  | 4.78-66.66    | 117.85     | 24.36-339.78        | Region       |
| India                                   | 10.7   | 5.09-18.74    | 95501.29   | 45301.9-167593.15   | Country      |
| Nepal                                   | 23.12  | 4.78-66.66    | 4058.39    | 839.06-11701.23     | Region       |
| Pakistan                                | 23.12  | 4.78-66.66    | 28206.82   | 5831.69-81326.42    | Region       |
| South East Asia, east Asia, and Oceania | 69.05  | 16.36-224.77  | 1111535.11 | 263304.05-3618757   | SUPER-REGION |
| Asia, east                              | 70.42  | 17.67-206.58  | 807836.95  | 203296.05-2371601.4 | REGION       |
| China                                   | 59.38  | 58.91-59.91   | 670064.99  | 664612.97-676158.42 | Country      |
| Dem. People's Republic of Korea         | 70.42  | 17.67-206.58  | 13229.77   | 3319.65-38810.08    | Region       |
| Asia, South East                        | 69.05  | 16.36-224.77  | 1111535.11 | 263304.05-3618757   | REGION       |
| Cambodia                                | 69.05  | 16.36-224.77  | 6965.95    | 1650.44-22675.42    | Super-region |
| Indonesia                               | 69.05  | 16.36-224.77  | 123780.83  | 29327.36-402928.56  | Super-region |
| Lao People's Democratic Republic        | 69.05  | 16.36-224.77  | 2929.48    | 694.08-9535.96      | Super-region |
| Malaysia                                | 69.05  | 16.36-224.77  | 15264.16   | 3616.53-49687.53    | Super-region |
| Maldives                                | 69.05  | 16.36-224.77  | 281.91     | 66.79-917.67        | Super-region |
| Mauritius                               | 69.05  | 16.36-224.77  | 665.36     | 157.64-2165.88      | Super-region |
| Myanmar                                 | 69.05  | 16.36-224.77  | 24493.19   | 5803.17-79729.67    | Super-region |
| Philippines                             | 69.05  | 16.36-224.77  | 45707.85   | 10829.55-148787.17  | Super-region |
| Seychelles                              | 69.05  | 16.36-224.77  | 47.32      | 11.21-154.05        | Super-region |
| Sri Lanka                               | 69.05  | 16.36-224.77  | 10134.07   | 2401.06-32988.19    | Super-region |
| Thailand                                | 69.05  | 16.36-224.77  | 37189.69   | 8811.34-121059.03   | Super-region |
| Timor-Leste                             | 69.05  | 16.36-224.77  | 469.43     | 111.22-1528.09      | Super-region |

|                                  |       |              |            |                       |              |
|----------------------------------|-------|--------------|------------|-----------------------|--------------|
| Vietnam                          | 69.05 | 16.36-224.77 | 47117.73   | 11163.59-153376.57    | Super-region |
| Oceania                          | 69.05 | 16.36-224.77 | 1111535.11 | 263304.05-3618757     | REGION       |
| Fiji                             | 69.05 | 16.36-224.77 | 387.49     | 91.81-1261.34         | Super-region |
| Guam                             | 69.05 | 16.36-224.77 | 79.15      | 18.75-257.66          | Super-region |
| Kiribati                         | 69.05 | 16.36-224.77 | 45.81      | 10.85-149.13          | Super-region |
| Marshall Islands                 | 69.05 | 16.36-224.77 | 19.09      | 4.52-62.15            | Super-region |
| Micronesia (Fed. States of)      | 69.05 | 16.36-224.77 | 46.73      | 11.07-152.11          | Super-region |
| Papua New Guinea                 | 69.05 | 16.36-224.77 | 3368.81    | 798.17-10966.06       | Super-region |
| Samoa                            | 69.05 | 16.36-224.77 | 72.7       | 17.23-236.66          | Super-region |
| Solomon Islands                  | 69.05 | 16.36-224.77 | 236.07     | 55.93-768.44          | Super-region |
| Tonga                            | 69.05 | 16.36-224.77 | 39.73      | 9.41-129.32           | Super-region |
| Vanuatu                          | 69.05 | 16.36-224.77 | 110.02     | 26.07-358.15          | Super-region |
| Sub-Saharan Africa               | 61.08 | 22.18-151.87 | 3174949.11 | 1153235.05-7896862.42 | SUPER-REGION |
| Sub-Saharan Africa, central      | 61.08 | 22.18-151.87 | 3174949.11 | 1153235.05-7896862.42 | REGION       |
| Angola                           | 61.08 | 22.18-151.87 | 8603.29    | 3124.12-21391.32      | Global       |
| Central African Republic         | 61.08 | 22.18-151.87 | 1300.73    | 472.33-3234.14        | Global       |
| Congo                            | 61.08 | 22.18-151.87 | 1629.49    | 591.72-4051.58        | Global       |
| Democratic Republic of the Congo | 61.08 | 22.18-151.87 | 23866.34   | 8666.59-59341.53      | Global       |
| Equatorial Guinea                | 61.08 | 22.18-151.87 | 467.89     | 169.9-1163.36         | Global       |
| Gabon                            | 61.08 | 22.18-151.87 | 734.76     | 266.81-1826.92        | Global       |
| Sub-Saharan Africa, eastern      | 61.08 | 22.18-151.87 | 3174949.11 | 1153235.05-7896862.42 | REGION       |
| Burundi                          | 61.08 | 22.18-151.87 | 3232.98    | 1173.99-8038.52       | Global       |
| Comoros                          | 61.08 | 22.18-151.87 | 269.17     | 97.74-669.27          | Global       |
| Djibouti                         | 61.08 | 22.18-151.87 | 373.55     | 135.65-928.79         | Global       |
| Eritrea                          | 61.08 | 22.18-151.87 | 1046.91    | 380.17-2603.06        | Global       |
| Ethiopia                         | 61.08 | 22.18-151.87 | 34263.8    | 12442.23-85193.9      | Global       |
| Kenya                            | 61.08 | 22.18-151.87 | 16498.01   | 5990.93-41020.85      | Global       |
| Madagascar                       | 61.08 | 22.18-151.87 | 8297.73    | 3013.16-20631.58      | Global       |
| Malawi                           | 61.08 | 22.18-151.87 | 5331.9     | 1936.18-13257.31      | Global       |
| Mozambique                       | 61.08 | 22.18-151.87 | 8515.89    | 3092.38-21174         | Global       |
| Rwanda                           | 61.08 | 22.18-151.87 | 3961.27    | 1438.46-9849.35       | Global       |
| Somalia                          | 61.08 | 22.18-151.87 | 4116.93    | 1494.98-10236.38      | Global       |
| South Sudan                      | 61.08 | 22.18-151.87 | 3277.63    | 1190.21-8149.53       | Global       |
| Uganda                           | 61.08 | 22.18-151.87 | 11871.28   | 4310.82-29516.87      | Global       |
| United Republic of Tanzania      | 61.08 | 22.18-151.87 | 16664.36   | 6051.34-41434.46      | Global       |
| Zambia                           | 61.08 | 22.18-151.87 | 4990.38    | 1812.16-12408.13      | Global       |
| Sub-Saharan Africa, southern     | 61.08 | 22.18-151.87 | 3174949.11 | 1153235.05-7896862.42 | REGION       |
| Botswana                         | 61.08 | 22.18-151.87 | 818.83     | 297.34-2035.95        | Global       |
| Lesotho                          | 61.08 | 22.18-151.87 | 754.14     | 273.85-1875.1         | Global       |
| Namibia                          | 61.08 | 22.18-151.87 | 830.66     | 301.64-2065.36        | Global       |
| South Africa                     | 61.08 | 22.18-151.87 | 22791.31   | 8276.21-56668.56      | Global       |
| Eswatini                         | 61.08 | 22.18-151.87 | 364.36     | 132.31-905.94         | Global       |
| Zimbabwe                         | 61.08 | 22.18-151.87 | 4272.42    | 1551.45-10622.99      | Global       |
| Sub-Saharan Africa, western      | 61.08 | 22.18-151.87 | 3174949.11 | 1153235.05-7896862.42 | REGION       |
| Benin                            | 61.08 | 22.18-151.87 | 3510.09    | 1274.62-8727.54       | Global       |
| Burkina Faso                     | 61.08 | 22.18-151.87 | 5693.6     | 2067.52-14156.63      | Global       |
| Cote d'Ivoire                    | 61.08 | 22.18-151.87 | 7649.13    | 2777.63-19018.87      | Global       |
| Cameroon                         | 61.08 | 22.18-151.87 | 7649.28    | 2777.68-19019.25      | Global       |
| Cabo Verde                       | 61.08 | 22.18-151.87 | 214.37     | 77.85-533.02          | Global       |
| Chad                             | 61.08 | 22.18-151.87 | 4235.63    | 1538.08-10531.51      | Global       |
| Gambia                           | 61.08 | 22.18-151.87 | 670.35     | 243.42-1666.77        | Global       |

|                       |       |              |          |                    |        |
|-----------------------|-------|--------------|----------|--------------------|--------|
| Ghana                 | 61.08 | 22.18-151.87 | 10016.1  | 3637.15-24904.16   | Global |
| Guinea                | 61.08 | 22.18-151.87 | 3645.08  | 1323.64-9063.16    | Global |
| Guinea-Bissau         | 61.08 | 22.18-151.87 | 571.48   | 207.52-1420.93     | Global |
| Liberia               | 61.08 | 22.18-151.87 | 1504.91  | 546.48-3741.83     | Global |
| Mali                  | 61.08 | 22.18-151.87 | 5180.22  | 1881.1-12880.16    | Global |
| Mauritania            | 61.08 | 22.18-151.87 | 1425.77  | 517.74-3545.05     | Global |
| Niger                 | 61.08 | 22.18-151.87 | 5831.6   | 2117.63-14499.76   | Global |
| Nigeria               | 61.08 | 22.18-151.87 | 57771.86 | 20978.71-143644.61 | Global |
| Sao Tome and Principe | 61.08 | 22.18-151.87 | 62.69    | 22.77-155.88       | Global |
| Senegal               | 61.08 | 22.18-151.87 | 4793.34  | 1740.61-11918.21   | Global |
| Sierra Leone          | 61.08 | 22.18-151.87 | 2372.28  | 861.45-5898.46     | Global |
| Togo                  | 61.08 | 22.18-151.87 | 2457.59  | 892.43-6110.58     | Global |

**Table S19. Estimated period prevalence of SLE diagnosed by physician/dermatologist for male.**

| Country/Region/Super-region                      | Expected Prevalence | 95% Confidence Interval of Prevalence | Expected Patient Number | 95% Confidence Interval of Patient Number | Hierarchy of Region in Estimate |
|--------------------------------------------------|---------------------|---------------------------------------|-------------------------|-------------------------------------------|---------------------------------|
| Global                                           | 9.26                | 3.36-22.97                            | 363723.56               | 132217.17-903245.82                       | GLOBAL                          |
| Central Europe, eastern Europe, and central Asia | 6.8                 | 2.33-14.24                            | 13541.65                | 4638.27-28305.65                          | SUPER-REGION                    |
| Asia, central                                    | 4.55                | 1.35-11.38                            | 2130.96                 | 633.92-5303.22                            | REGION                          |
| Armenia                                          | 4.55                | 1.35-11.38                            | 63.41                   | 18.82-158.6                               | Region                          |
| Azerbaijan                                       | 4.55                | 1.35-11.38                            | 230.44                  | 68.37-576.36                              | Region                          |
| Georgia                                          | 4.55                | 1.35-11.38                            | 86.51                   | 25.67-216.36                              | Region                          |
| Kazakhstan                                       | 2.83                | 2.13-3.67                             | 257.86                  | 186.98-341.03                             | Country                         |
| Kyrgyzstan                                       | 4.55                | 1.35-11.38                            | 146.84                  | 43.57-367.26                              | Region                          |
| Mongolia                                         | 4.55                | 1.35-11.38                            | 73.48                   | 21.8-183.79                               | Region                          |
| Tajikistan                                       | 4.55                | 1.35-11.38                            | 218.66                  | 64.88-546.89                              | Region                          |
| Turkmenistan                                     | 4.55                | 1.35-11.38                            | 135.1                   | 40.09-337.91                              | Region                          |
| Uzbekistan                                       | 4.55                | 1.35-11.38                            | 759.71                  | 225.41-1900.1                             | Region                          |
| Europe, central                                  | 10                  | 2.78-27.01                            | 5531.96                 | 1611.33-14837.27                          | REGION                          |
| Albania                                          | 10                  | 2.78-27.01                            | 146.47                  | 40.72-395.62                              | Region                          |
| Bosnia and Herzegovina                           | 10                  | 2.78-27.01                            | 160.66                  | 44.66-433.94                              | Region                          |
| Bulgaria                                         | 10                  | 2.78-27.01                            | 337.41                  | 93.8-911.33                               | Region                          |
| Croatia                                          | 10                  | 2.78-27.01                            | 197.92                  | 55.02-534.59                              | Region                          |
| Czechia                                          | 10                  | 2.78-27.01                            | 527.24                  | 146.57-1424.09                            | Region                          |
| Hungary                                          | 11.97               | 11.82-12.13                           | 551.03                  | 507-596                                   | Country                         |
| Montenegro                                       | 10                  | 2.78-27.01                            | 31.06                   | 8.63-83.88                                | Region                          |
| Poland                                           | 10                  | 2.78-27.01                            | 1833.67                 | 509.76-4952.74                            | Region                          |
| Romania                                          | 10                  | 2.78-27.01                            | 935.34                  | 260.03-2526.36                            | Region                          |
| Serbia                                           | 10                  | 2.78-27.01                            | 427.96                  | 118.97-1155.93                            | Region                          |
| Slovakia                                         | 10                  | 2.78-27.01                            | 265.84                  | 73.9-718.04                               | Region                          |
| Slovenia                                         | 10                  | 2.78-27.01                            | 103.52                  | 28.78-279.61                              | Region                          |
| North Macedonia                                  | 10                  | 2.78-27.01                            | 104.21                  | 28.97-281.48                              | Region                          |
| Europe, eastern                                  | 6.64                | 1.96-19.31                            | 5120.77                 | 1542.58-12909.32                          | REGION                          |
| Belarus                                          | 6.64                | 1.96-19.31                            | 292.12                  | 86.23-849.51                              | Region                          |
| Estonia                                          | 14.66               | 4.08-44.61                            | 74.5                    | 17.98-191                                 | Country                         |
| Latvia                                           | 6.64                | 1.96-19.31                            | 57.72                   | 17.04-167.85                              | Region                          |
| Lithuania                                        | 12.59               | 3.49-38.86                            | 127.87                  | 32.98-326.32                              | Country                         |
| Republic of Moldova                              | 6.64                | 1.96-19.31                            | 128.28                  | 37.87-373.06                              | Region                          |
| Russia                                           | 2                   | 0.56-6.24                             | 1091.95                 | 294.88-2882.27                            | Country                         |
| Ukraine                                          | 3.42                | 0.89-10.72                            | 561.27                  | 136.95-1538.37                            | Country                         |
| High income                                      | 6.91                | 2.83-12.3                             | 36937.86                | 15250.93-65834.68                         | SUPER-REGION                    |
| Asia Pacific, high income                        | 6.55                | 2.52-12.73                            | 5946.89                 | 2297.67-11466.7                           | REGION                          |
| Brunei Darussalam                                | 6.55                | 2.52-12.73                            | 14.87                   | 5.72-28.89                                | Region                          |
| Japan                                            | 5.44                | 4.85-6.02                             | 3357.95                 | 2965.95-3720.12                           | Country                         |
| Republic of Korea                                | 5.57                | 5.51-5.64                             | 1432.41                 | 1356.98-1510.02                           | Country                         |
| Singapore                                        | 6.55                | 2.52-12.73                            | 200.57                  | 77.17-389.81                              | Region                          |

|                                         |       |             |          |                    |              |
|-----------------------------------------|-------|-------------|----------|--------------------|--------------|
| <b>Australasia</b>                      | 4.64  | 1.22-11.26  | 698.52   | 182.93-1677.32     | REGION       |
| <b>Australia</b>                        | 2.25  | 1.77-2.78   | 286.46   | 219.97-363         | Country      |
| <b>New Zealand</b>                      | 4.64  | 1.22-11.26  | 109.97   | 28.91-266.86       | Region       |
| <b>Europe, western</b>                  | 12.45 | 7.91-18.03  | 26568.93 | 16823.72-38690.3   | REGION       |
| <b>Austria</b>                          | 12.45 | 7.91-18.03  | 552.72   | 351.16-800.44      | Region       |
| <b>Belgium</b>                          | 12.45 | 7.91-18.03  | 715.13   | 454.35-1035.65     | Region       |
| <b>Cyprus</b>                           | 12.45 | 7.91-18.03  | 75.14    | 47.74-108.81       | Region       |
| <b>Denmark</b>                          | 12.97 | 12.44-13.47 | 373.93   | 333.98-414.03      | Country      |
| <b>Finland</b>                          | 12.45 | 7.91-18.03  | 340.17   | 216.12-492.63      | Region       |
| <b>France</b>                           | 8.2   | 8.07-8.34   | 2592.58  | 2482.98-2695.1     | Country      |
| <b>Germany</b>                          | 6.07  | 5.93-6.21   | 2515.2   | 2402-2631.03       | Country      |
| <b>Greece</b>                           | 8.21  | 7.72-8.74   | 420.32   | 371-469            | Country      |
| <b>Iceland</b>                          | 12.45 | 7.91-18.03  | 21.34    | 13.56-30.9         | Region       |
| <b>Ireland</b>                          | 12.45 | 7.91-18.03  | 305.18   | 193.89-441.96      | Region       |
| <b>Israel</b>                           | 12.45 | 7.91-18.03  | 536.3    | 340.74-776.67      | Region       |
| <b>Italy</b>                            | 12.17 | 10.81-13.67 | 3582.79  | 3176.95-4039       | Country      |
| <b>Luxembourg</b>                       | 12.45 | 7.91-18.03  | 39.41    | 25.04-57.08        | Region       |
| <b>Malta</b>                            | 8.57  | 6.97-10.21  | 19.05    | 10-29              | Country      |
| <b>Netherlands</b>                      | 23.6  | 18.23-29.84 | 2016.3   | 1556.9-2573.17     | Country      |
| <b>Norway</b>                           | 19.07 | 17.04-21.26 | 523.08   | 452-601            | Country      |
| <b>Portugal</b>                         | 12.45 | 7.91-18.03  | 600.54   | 381.55-869.7       | Region       |
| <b>Spain</b>                            | 15.56 | 14.02-17.22 | 3577.07  | 3206.95-3961.15    | Country      |
| <b>Sweden</b>                           | 29.83 | 29-30.64    | 1510.44  | 1427.97-1594       | Country      |
| <b>Switzerland</b>                      | 12.45 | 7.91-18.03  | 534.52   | 339.6-774.09       | Region       |
| <b>United Kingdom</b>                   | 21.78 | 21.33-22.23 | 7308.76  | 7085.88-7545       | Country      |
| <b>Latin America, southern</b>          | 3.44  | 0.62-9.73   | 1140.62  | 226.52-3209.15     | REGION       |
| <b>Argentina</b>                        | 1.03  | 0.86-1.24   | 226.6    | 179.98-281         | Country      |
| <b>Chile</b>                            | 3.44  | 0.62-9.73   | 324.22   | 58.43-917.04       | Region       |
| <b>Uruguay</b>                          | 3.44  | 0.62-9.73   | 57.73    | 10.4-163.28        | Region       |
| <b>North America, high income</b>       | 8.43  | 3.32-17.51  | 15386.08 | 6100.65-31934.62   | REGION       |
| <b>Canada</b>                           | 5.99  | 5.85-6.15   | 1123.71  | 1053-1197.03       | Country      |
| <b>United States of America</b>         | 11.27 | 11.09-11.45 | 18454.63 | 18056.68-18839     | Country      |
| <b>Latin America and Caribbean</b>      | 14.78 | 5.28-36.01  | 42501.92 | 15296.73-103284.07 | SUPER-REGION |
| <b>Caribbean</b>                        | 18.95 | 4.94-51.25  | 5555.3   | 2196.78-11925.25   | REGION       |
| <b>Antigua and Barbuda</b>              | 18.95 | 4.94-51.25  | 8.96     | 2.33-24.22         | Region       |
| <b>Bahamas</b>                          | 18.95 | 4.94-51.25  | 36.21    | 9.44-97.93         | Region       |
| <b>Barbados</b>                         | 33.4  | 7.18-80.61  | 57.53    | 42.98-73.02        | Country      |
| <b>Belize</b>                           | 18.95 | 4.94-51.25  | 37.47    | 9.77-101.35        | Region       |
| <b>Cuba</b>                             | 31.55 | 5.45-89.33  | 2253.44  | 844.9-4592.95      | Country      |
| <b>Dominican Republic</b>               | 18.95 | 4.94-51.25  | 1026.57  | 267.61-2776.35     | Region       |
| <b>Grenada</b>                          | 18.95 | 4.94-51.25  | 10.74    | 2.8-29.04          | Region       |
| <b>Guyana</b>                           | 18.95 | 4.94-51.25  | 74.95    | 19.54-202.69       | Region       |
| <b>Haiti</b>                            | 18.95 | 4.94-51.25  | 1066.19  | 277.94-2883.51     | Region       |
| <b>Jamaica</b>                          | 18.95 | 4.94-51.25  | 278.47   | 72.59-753.12       | Region       |
| <b>Puerto Rico</b>                      | 22.15 | 4.73-53.93  | 371.31   | 329.98-415         | Country      |
| <b>Saint Lucia</b>                      | 18.95 | 4.94-51.25  | 17.13    | 4.47-46.33         | Region       |
| <b>Saint Vincent and the Grenadines</b> | 18.95 | 4.94-51.25  | 10.65    | 2.78-28.81         | Region       |
| <b>Suriname</b>                         | 18.95 | 4.94-51.25  | 55.87    | 14.56-151.09       | Region       |
| <b>Trinidad and Tobago</b>              | 18.95 | 4.94-51.25  | 130.93   | 34.13-354.1        | Region       |
| <b>Virgin Island (US)</b>               | 18.95 | 4.94-51.25  | 9.4      | 2.45-25.42         | Region       |
| <b>Latin America, Andean</b>            | 15.89 | 3.42-42.24  | 4937.52  | 1064.9-13082.5     | REGION       |
| <b>Bolivia</b>                          | 15.89 | 3.42-42.24  | 930.76   | 200.33-2474.23     | Region       |
| <b>Ecuador</b>                          | 14.34 | 4.4-31.72   | 1266.45  | 388-2836.2         | Country      |
| <b>Peru</b>                             | 15.89 | 3.42-42.24  | 2602.5   | 560.13-6918.16     | Region       |
| <b>Latin America, central</b>           | 11.51 | 4.86-22.13  | 14597.01 | 6148.8-28105.4     | REGION       |
| <b>Colombia</b>                         | 3.39  | 3.33-3.46   | 848.91   | 793.98-909         | Country      |
| <b>Costa Rica</b>                       | 11.51 | 4.86-22.13  | 292.91   | 123.68-563.18      | Region       |
| <b>El Salvador</b>                      | 11.51 | 4.86-22.13  | 349.49   | 147.57-671.95      | Region       |

|                                         |       |             |           |                    |              |
|-----------------------------------------|-------|-------------|-----------|--------------------|--------------|
| Guatemala                               | 11.51 | 4.86-22.13  | 1015.98   | 428.99-1953.41     | Region       |
| Honduras                                | 11.51 | 4.86-22.13  | 569.6     | 240.51-1095.15     | Region       |
| Mexico                                  | 23.03 | 13.49-34.83 | 14527.52  | 8535.5-22000.62    | Country      |
| Nicaragua                               | 11.51 | 4.86-22.13  | 375.77    | 158.67-722.49      | Region       |
| Panama                                  | 11.51 | 4.86-22.13  | 248.55    | 104.95-477.88      | Region       |
| Venezuela (Bolivarian Republic of)      | 14.75 | 4.57-32.78  | 2064.75   | 642-4558.52        | Country      |
| Latin America, tropical                 | 22.96 | 5.55-65.79  | 24811.28  | 5992.05-71066.73   | REGION       |
| Brazil                                  | 30.55 | 7.23-73.12  | 31909.17  | 7526.52-76769.07   | Country      |
| Paraguay                                | 22.96 | 5.55-65.79  | 832.13    | 201.15-2384.4      | Region       |
| North Africa and Middle East            | 12.89 | 3.22-32.83  | 41131.43  | 10347.38-104788.7  | SUPER-REGION |
| North Africa and the Middle East        | 14.87 | 6.69-27.47  | 47426.68  | 21365.47-87573.47  | REGION       |
| Afghanistan                             | 14.87 | 6.69-27.47  | 2970.47   | 1336.41-5487.48    | Region       |
| Algeria                                 | 14.87 | 6.69-27.47  | 3294.2    | 1482.06-6085.51    | Region       |
| Bahrain                                 | 14.87 | 6.69-27.47  | 163.64    | 73.62-302.3        | Region       |
| Egypt                                   | 14.87 | 6.69-27.47  | 7688.19   | 3458.91-14202.73   | Region       |
| Iran (Islamic Republic of)              | 15.51 | 9.98-22.15  | 6581.52   | 4213.98-9449.4     | Country      |
| Iraq                                    | 14.87 | 6.69-27.47  | 3027.2    | 1361.93-5592.27    | Region       |
| Jordan                                  | 14.87 | 6.69-27.47  | 768.18    | 345.6-1419.09      | Region       |
| Kuwait                                  | 14.87 | 6.69-27.47  | 388.77    | 174.91-718.19      | Region       |
| Lebanon                                 | 14.87 | 6.69-27.47  | 510.89    | 229.85-943.79      | Region       |
| Libya                                   | 14.87 | 6.69-27.47  | 515.8     | 232.06-952.86      | Region       |
| Morocco                                 | 14.87 | 6.69-27.47  | 2723.72   | 1225.4-5031.65     | Region       |
| Palestine                               | 14.87 | 6.69-27.47  | 384.68    | 173.07-710.64      | Region       |
| Oman                                    | 14.87 | 6.69-27.47  | 501.15    | 225.47-925.8       | Region       |
| Qatar                                   | 14.87 | 6.69-27.47  | 321.95    | 144.85-594.75      | Region       |
| Saudi Arabia                            | 12.85 | 4.06-28.9   | 2589.05   | 836.43-5788.6      | Country      |
| Sudan                                   | 14.87 | 6.69-27.47  | 3257.6    | 1465.59-6017.9     | Region       |
| Syrian Arab Republic                    | 14.87 | 6.69-27.47  | 1302.62   | 586.05-2406.38     | Region       |
| Sudan                                   | 14.87 | 6.69-27.47  | 3257.6    | 1465.59-6017.9     | Region       |
| Tunisia                                 | 14.87 | 6.69-27.47  | 871.48    | 392.08-1609.93     | Region       |
| Turkey                                  | 10.41 | 9.63-11.24  | 4334.32   | 3996.62-4708.48    | Country      |
| United Arab Emirates                    | 58.2  | 48.54-69.28 | 3980.14   | 3298.42-4762.4     | Country      |
| Yemen                                   | 14.87 | 6.69-27.47  | 2234.21   | 1005.17-4127.36    | Region       |
| South Asia                              | 5.61  | 0.91-15.58  | 52056.36  | 8425.3-145026.52   | SUPER-REGION |
| Asia, south                             | 3.46  | 0.72-9.95   | 32072.66  | 6526.82-92457.82   | REGION       |
| Bangladesh                              | 3.46  | 0.72-9.95   | 2880.7    | 599.45-8284.09     | Region       |
| Bhutan                                  | 3.46  | 0.72-9.95   | 14.19     | 2.95-40.8          | Region       |
| India                                   | 1.63  | 0.78-2.86   | 11719.22  | 5577.22-20570.8    | Country      |
| Nepal                                   | 3.46  | 0.72-9.95   | 461.86    | 96.11-1328.17      | Region       |
| Pakistan                                | 3.46  | 0.72-9.95   | 3933.03   | 818.43-11310.31    | Region       |
| South East Asia, east Asia, and Oceania | 11.34 | 2.7-36.8    | 126344.38 | 30193.45-410470.1  | SUPER-REGION |
| Asia, east                              | 12.05 | 3-35.43     | 92358.56  | 23092.47-271968.55 | REGION       |
| China                                   | 10.17 | 10.04-10.31 | 76677.48  | 75630.88-77816.02  | Country      |
| Dem. People's Republic of Korea         | 12.05 | 3-35.43     | 1519.31   | 378.25-4467.14     | Region       |
| Asia, South East                        | 11.34 | 2.7-36.8    | 126344.38 | 30193.45-410470.1  | REGION       |
| Cambodia                                | 11.34 | 2.7-36.8    | 925.62    | 220.39-3003.77     | Super-region |
| Indonesia                               | 11.34 | 2.7-36.8    | 15617.16  | 3718.37-50680.04   | Super-region |
| Lao People's Democratic Republic        | 11.34 | 2.7-36.8    | 414.11    | 98.6-1343.86       | Super-region |
| Malaysia                                | 11.34 | 2.7-36.8    | 1885.84   | 449.01-6119.82     | Super-region |
| Maldives                                | 11.34 | 2.7-36.8    | 38.89     | 9.26-126.2         | Super-region |
| Mauritius                               | 11.34 | 2.7-36.8    | 71.15     | 16.94-230.91       | Super-region |
| Myanmar                                 | 11.34 | 2.7-36.8    | 2973.36   | 707.94-9649.01     | Super-region |
| Philippines                             | 11.34 | 2.7-36.8    | 6240.24   | 1485.77-20250.53   | Super-region |
| Seychelles                              | 11.34 | 2.7-36.8    | 5.72      | 1.36-18.56         | Super-region |
| Sri Lanka                               | 11.34 | 2.7-36.8    | 1164.27   | 277.21-3778.24     | Super-region |
| Thailand                                | 11.34 | 2.7-36.8    | 3851.44   | 917.01-12498.51    | Super-region |
| Timor-Leste                             | 11.34 | 2.7-36.8    | 75.55     | 17.99-245.18       | Super-region |

|                                  |       |            |           |                     |              |
|----------------------------------|-------|------------|-----------|---------------------|--------------|
| Vietnam                          | 11.34 | 2.7-36.8   | 5510.39   | 1312-17882.04       | Super-region |
| Oceania                          | 11.34 | 2.7-36.8   | 126344.38 | 30193.45-410470.1   | REGION       |
| Fiji                             | 11.34 | 2.7-36.8   | 51.49     | 12.26-167.08        | Super-region |
| Guam                             | 11.34 | 2.7-36.8   | 9.65      | 2.3-31.33           | Super-region |
| Kiribati                         | 11.34 | 2.7-36.8   | 6.66      | 1.59-21.62          | Super-region |
| Marshall Islands                 | 11.34 | 2.7-36.8   | 3.24      | 0.77-10.52          | Super-region |
| Micronesia (Fed. States of)      | 11.34 | 2.7-36.8   | 6.63      | 1.58-21.52          | Super-region |
| Papua New Guinea                 | 11.34 | 2.7-36.8   | 518.02    | 123.34-1681.05      | Super-region |
| Samoa                            | 11.34 | 2.7-36.8   | 11.65     | 2.77-37.79          | Super-region |
| Solomon Islands                  | 11.34 | 2.7-36.8   | 39.61     | 9.43-128.53         | Super-region |
| Tonga                            | 11.34 | 2.7-36.8   | 6         | 1.43-19.47          | Super-region |
| Vanuatu                          | 11.34 | 2.7-36.8   | 17.66     | 4.2-57.29           | Super-region |
| Sub-Saharan Africa               | 9.26  | 3.36-22.97 | 363723.56 | 132217.17-903245.82 | SUPER-REGION |
| Sub-Saharan Africa, central      | 9.26  | 3.36-22.97 | 363723.56 | 132217.17-903245.82 | REGION       |
| Angola                           | 9.26  | 3.36-22.97 | 1505.76   | 546.36-3735.12      | Global       |
| Central African Republic         | 9.26  | 3.36-22.97 | 221.69    | 80.44-549.91        | Global       |
| Congo                            | 9.26  | 3.36-22.97 | 255.27    | 92.62-633.21        | Global       |
| Democratic Republic of the Congo | 9.26  | 3.36-22.97 | 4140.16   | 1502.26-10269.92    | Global       |
| Equatorial Guinea                | 9.26  | 3.36-22.97 | 72.26     | 26.22-179.25        | Global       |
| Gabon                            | 9.26  | 3.36-22.97 | 104.9     | 38.06-260.22        | Global       |
| Sub-Saharan Africa, eastern      | 9.26  | 3.36-22.97 | 363723.56 | 132217.17-903245.82 | REGION       |
| Burundi                          | 9.26  | 3.36-22.97 | 546.33    | 198.24-1355.2       | Global       |
| Comoros                          | 9.26  | 3.36-22.97 | 40.62     | 14.74-100.76        | Global       |
| Djibouti                         | 9.26  | 3.36-22.97 | 48.06     | 17.44-119.21        | Global       |
| Eritrea                          | 9.26  | 3.36-22.97 | 164.6     | 59.73-408.3         | Global       |
| Ethiopia                         | 9.26  | 3.36-22.97 | 5326.04   | 1932.56-13211.58    | Global       |
| Kenya                            | 9.26  | 3.36-22.97 | 2474.14   | 897.74-6137.25      | Global       |
| Madagascar                       | 9.26  | 3.36-22.97 | 1279.23   | 464.17-3173.2       | Global       |
| Malawi                           | 9.26  | 3.36-22.97 | 873.59    | 316.98-2167         | Global       |
| Mozambique                       | 9.26  | 3.36-22.97 | 1406.43   | 510.32-3488.74      | Global       |
| Rwanda                           | 9.26  | 3.36-22.97 | 589.62    | 213.95-1462.6       | Global       |
| Somalia                          | 9.26  | 3.36-22.97 | 733.77    | 266.25-1820.16      | Global       |
| South Sudan                      | 9.26  | 3.36-22.97 | 518.84    | 188.26-1287.01      | Global       |
| Uganda                           | 9.26  | 3.36-22.97 | 2087.81   | 757.57-5178.95      | Global       |
| United Republic of Tanzania      | 9.26  | 3.36-22.97 | 2764.21   | 1003-6856.8         | Global       |
| Zambia                           | 9.26  | 3.36-22.97 | 842.94    | 305.86-2090.96      | Global       |
| Sub-Saharan Africa, southern     | 9.26  | 3.36-22.97 | 363723.56 | 132217.17-903245.82 | REGION       |
| Botswana                         | 9.26  | 3.36-22.97 | 105.48    | 38.27-261.65        | Global       |
| Lesotho                          | 9.26  | 3.36-22.97 | 97.87     | 35.51-242.78        | Global       |
| Namibia                          | 9.26  | 3.36-22.97 | 114.05    | 41.38-282.92        | Global       |
| South Africa                     | 9.26  | 3.36-22.97 | 2705.4    | 981.66-6710.92      | Global       |
| Eswatini                         | 9.26  | 3.36-22.97 | 52.8      | 19.16-130.98        | Global       |
| Zimbabwe                         | 9.26  | 3.36-22.97 | 656.72    | 238.29-1629.03      | Global       |
| Sub-Saharan Africa, western      | 9.26  | 3.36-22.97 | 363723.56 | 132217.17-903245.82 | REGION       |
| Benin                            | 9.26  | 3.36-22.97 | 560.62    | 203.42-1390.66      | Global       |
| Burkina Faso                     | 9.26  | 3.36-22.97 | 967.18    | 350.94-2399.15      | Global       |
| Cote d'Ivoire                    | 9.26  | 3.36-22.97 | 1231.62   | 446.89-3055.1       | Global       |
| Cameroon                         | 9.26  | 3.36-22.97 | 1229.46   | 446.11-3049.74      | Global       |
| Cabo Verde                       | 9.26  | 3.36-22.97 | 25.85     | 9.38-64.11          | Global       |
| Chad                             | 9.26  | 3.36-22.97 | 759.34    | 275.53-1883.58      | Global       |
| Gambia                           | 9.26  | 3.36-22.97 | 110.98    | 40.27-275.3         | Global       |
| Ghana                            | 9.26  | 3.36-22.97 | 1458.45   | 529.2-3617.77       | Global       |
| Guinea                           | 9.26  | 3.36-22.97 | 588.31    | 213.47-1459.34      | Global       |
| Guinea-Bissau                    | 9.26  | 3.36-22.97 | 89.15     | 32.35-221.13        | Global       |
| Liberia                          | 9.26  | 3.36-22.97 | 235.44    | 85.43-584.02        | Global       |
| Mali                             | 9.26  | 3.36-22.97 | 939.44    | 340.88-2330.35      | Global       |
| Mauritania                       | 9.26  | 3.36-22.97 | 216.22    | 78.46-536.34        | Global       |
| Niger                            | 9.26  | 3.36-22.97 | 1126.96   | 408.92-2795.49      | Global       |

|                       |      |            |         |                  |        |
|-----------------------|------|------------|---------|------------------|--------|
| Nigeria               | 9.26 | 3.36-22.97 | 9673.89 | 3510.18-23996.67 | Global |
| Sao Tome and Principe | 9.26 | 3.36-22.97 | 10.16   | 3.69-25.19       | Global |
| Senegal               | 9.26 | 3.36-22.97 | 756.61  | 274.54-1876.83   | Global |
| Sierra Leone          | 9.26 | 3.36-22.97 | 368.66  | 133.77-914.49    | Global |
| Togo                  | 9.26 | 3.36-22.97 | 381.46  | 138.41-946.23    | Global |

**Table S20. Estimated period prevalence of SLE diagnosed by physician/dermatologist for male adults.**

| Country/Region/Super-region                      | Expected Prevalence | 95% Confidence Interval of Prevalence | Expected Patient Number | 95% Confidence Interval of Patient Number | Hierarchy of Region in Estimate |
|--------------------------------------------------|---------------------|---------------------------------------|-------------------------|-------------------------------------------|---------------------------------|
| Global                                           | 13.04               | 4.73-32.29                            | 337533.39               | 122642.17-836097.75                       | GLOBAL                          |
| Central Europe, eastern Europe, and central Asia | 8.82                | 3.02-18.42                            | 12834.62                | 4399.88-26815.5                           | SUPER-REGION                    |
| Asia, central                                    | 6.69                | 1.99-16.74                            | 1954.62                 | 580.75-4866.17                            | REGION                          |
| Armenia                                          | 6.69                | 1.99-16.74                            | 65.23                   | 19.4-163.23                               | Region                          |
| Azerbaijan                                       | 6.69                | 1.99-16.74                            | 230.99                  | 68.71-577.99                              | Region                          |
| Georgia                                          | 6.69                | 1.99-16.74                            | 91.41                   | 27.19-228.73                              | Region                          |
| Kazakhstan                                       | 4.14                | 3.11-5.35                             | 236.71                  | 172-312.02                                | Country                         |
| Kyrgyzstan                                       | 6.69                | 1.99-16.74                            | 125.89                  | 37.45-315.02                              | Region                          |
| Mongolia                                         | 6.69                | 1.99-16.74                            | 66.16                   | 19.68-165.54                              | Region                          |
| Tajikistan                                       | 6.69                | 1.99-16.74                            | 171.48                  | 51.01-429.1                               | Region                          |
| Turkmenistan                                     | 6.69                | 1.99-16.74                            | 119.28                  | 35.48-298.46                              | Region                          |
| Uzbekistan                                       | 6.69                | 1.99-16.74                            | 699.05                  | 207.94-1749.2                             | Region                          |
| Europe, central                                  | 12.22               | 3.4-32.98                             | 5316.4                  | 1542.52-14233.65                          | REGION                          |
| Albania                                          | 12.22               | 3.4-32.98                             | 134.08                  | 37.31-361.87                              | Region                          |
| Bosnia and Herzegovina                           | 12.22               | 3.4-32.98                             | 156.13                  | 43.44-421.37                              | Region                          |
| Bulgaria                                         | 12.22               | 3.4-32.98                             | 328.36                  | 91.36-886.2                               | Region                          |
| Croatia                                          | 12.22               | 3.4-32.98                             | 191.94                  | 53.41-518.03                              | Region                          |
| Czechia                                          | 12.22               | 3.4-32.98                             | 507.86                  | 141.3-1370.63                             | Region                          |
| Hungary                                          | 14.57               | 14.38-14.77                           | 529.91                  | 487-572.05                                | Country                         |
| Montenegro                                       | 12.22               | 3.4-32.98                             | 28.23                   | 7.85-76.19                                | Region                          |
| Poland                                           | 12.22               | 3.4-32.98                             | 1772.24                 | 493.1-4783.02                             | Region                          |
| Romania                                          | 12.22               | 3.4-32.98                             | 893.01                  | 248.46-2410.11                            | Region                          |
| Serbia                                           | 12.22               | 3.4-32.98                             | 405.77                  | 112.9-1095.13                             | Region                          |
| Slovakia                                         | 12.22               | 3.4-32.98                             | 255.31                  | 71.03-689.03                              | Region                          |
| Slovenia                                         | 12.22               | 3.4-32.98                             | 100.93                  | 28.08-272.4                               | Region                          |
| North Macedonia                                  | 12.22               | 3.4-32.98                             | 98.27                   | 27.34-265.21                              | Region                          |
| Europe, eastern                                  | 8.42                | 2.48-24.51                            | 4879.99                 | 1468.78-12288.3                           | REGION                          |
| Belarus                                          | 8.42                | 2.48-24.51                            | 281.07                  | 82.78-818.17                              | Region                          |
| Estonia                                          | 18.23               | 5.07-55.42                            | 71.29                   | 16.98-182.05                              | Country                         |
| Latvia                                           | 8.42                | 2.48-24.51                            | 55.97                   | 16.48-162.92                              | Region                          |
| Lithuania                                        | 15.52               | 4.3-47.88                             | 122.61                  | 30.98-312.32                              | Country                         |
| Republic of Moldova                              | 8.42                | 2.48-24.51                            | 126.1                   | 37.14-367.08                              | Region                          |
| Russia                                           | 2.56                | 0.71-7.99                             | 1038.02                 | 277.98-2723.8                             | Country                         |
| Ukraine                                          | 4.25                | 1.1-13.3                              | 537.43                  | 129.93-1474.27                            | Country                         |
| High income                                      | 8.59                | 3.52-15.31                            | 35349.37                | 14602.33-62993.05                         | SUPER-REGION                    |
| Asia Pacific, high income                        | 7.73                | 2.97-15                               | 5759.99                 | 2225.82-11085.12                          | REGION                          |
| Brunei Darussalam                                | 7.73                | 2.97-15                               | 12.31                   | 4.73-23.9                                 | Region                          |
| Japan                                            | 6.41                | 5.72-7.09                             | 3252.52                 | 2878-3615.02                              | Country                         |
| Republic of Korea                                | 6.57                | 6.5-6.65                              | 1387.03                 | 1314-1458                                 | Country                         |
| Singapore                                        | 7.73                | 2.97-15                               | 197.45                  | 75.86-383.15                              | Region                          |
| Australasia                                      | 5.96                | 1.57-14.46                            | 663.35                  | 171.98-1600.07                            | REGION                          |
| Australia                                        | 2.89                | 2.28-3.57                             | 271.99                  | 207.98-345.02                             | Country                         |
| New Zealand                                      | 5.96                | 1.57-14.46                            | 103.37                  | 27.23-250.8                               | Region                          |
| Europe, western                                  | 15.31               | 9.73-22.14                            | 25494                   | 16138.6-37032.72                          | REGION                          |
| Austria                                          | 15.31               | 9.73-22.14                            | 541.49                  | 344.13-783.05                             | Region                          |
| Belgium                                          | 15.31               | 9.73-22.14                            | 673.23                  | 427.86-973.56                             | Region                          |



|                                  |       |             |          |                  |              |
|----------------------------------|-------|-------------|----------|------------------|--------------|
| Cyprus                           | 15.31 | 9.73-22.14  | 70.73    | 44.95-102.29     | Region       |
| Denmark                          | 16.09 | 15.42-16.71 | 358.01   | 318.98-397       | Country      |
| Finland                          | 15.31 | 9.73-22.14  | 326.2    | 207.31-471.73    | Region       |
| France                           | 10.41 | 10.24-10.58 | 2469.93  | 2360-2570.05     | Country      |
| Germany                          | 7.29  | 7.13-7.46   | 2425.86  | 2316.98-2541.02  | Country      |
| Greece                           | 9.85  | 9.27-10.49  | 405.46   | 358-455.03       | Country      |
| Iceland                          | 15.31 | 9.73-22.14  | 19.37    | 12.31-28.02      | Region       |
| Ireland                          | 15.31 | 9.73-22.14  | 270.2    | 171.72-390.74    | Region       |
| Israel                           | 15.31 | 9.73-22.14  | 417.77   | 265.51-604.14    | Region       |
| Italy                            | 14.48 | 12.85-16.27 | 3462.96  | 3074.95-3912.12  | Country      |
| Luxembourg                       | 15.31 | 9.73-22.14  | 38.14    | 24.24-55.15      | Region       |
| Malta                            | 10.28 | 8.37-12.26  | 18.38    | 10-28            | Country      |
| Netherlands                      | 29.12 | 22.5-36.85  | 1933.54  | 1491.9-2463.07   | Country      |
| Norway                           | 23.85 | 21.32-26.58 | 499.94   | 432-573          | Country      |
| Portugal                         | 15.31 | 9.73-22.14  | 592.8    | 376.74-857.25    | Region       |
| Spain                            | 18.77 | 16.91-20.76 | 3447.19  | 3095.93-3827.1   | Country      |
| Sweden                           | 37.3  | 36.23-38.32 | 1444.09  | 1366-1525.02     | Country      |
| Switzerland                      | 15.31 | 9.73-22.14  | 522.5    | 332.07-755.6     | Region       |
| United Kingdom                   | 27.34 | 26.76-27.92 | 6980.27  | 6756.97-7211.13  | Country      |
| Latin America, southern          | 4.69  | 0.84-13.28  | 1067.42  | 210.62-2984.62   | REGION       |
| Argentina                        | 1.44  | 1.2-1.73    | 210.45   | 167-258          | Country      |
| Chile                            | 4.69  | 0.84-13.28  | 324.59   | 58.14-919.11     | Region       |
| Uruguay                          | 4.69  | 0.84-13.28  | 55.89    | 10.01-158.26     | Region       |
| North America, high income       | 10.73 | 4.23-22.28  | 14647.91 | 5825.38-30408.92 | REGION       |
| Canada                           | 7.35  | 7.17-7.54   | 1078.71  | 1010.95-1152     | Country      |
| United States of America         | 14.4  | 14.17-14.64 | 17550.39 | 17149.92-17925.1 | Country      |
| Latin America and Caribbean      | 20.66 | 7.38-50.23  | 39523.45 | 14209.15-95887.1 | SUPER-REGION |
| Caribbean                        | 26.44 | 6.87-71.55  | 5169     | 2047.73-11149.8  | REGION       |
| Antigua and Barbuda              | 26.44 | 6.87-71.55  | 8.69     | 2.26-23.51       | Region       |
| Bahamas                          | 26.44 | 6.87-71.55  | 34.82    | 9.05-94.24       | Region       |
| Barbados                         | 42.24 | 9.07-101.91 | 54.81    | 40-71            | Country      |
| Belize                           | 26.44 | 6.87-71.55  | 31.41    | 8.16-85          | Region       |
| Cuba                             | 38.95 | 6.74-110.3  | 2160.33  | 812.85-4420.3    | Country      |
| Dominican Republic               | 26.44 | 6.87-71.55  | 901.71   | 234.3-2440.15    | Region       |
| Grenada                          | 26.44 | 6.87-71.55  | 10.34    | 2.69-27.99       | Region       |
| Guyana                           | 26.44 | 6.87-71.55  | 65.05    | 16.9-176.04      | Region       |
| Haiti                            | 26.44 | 6.87-71.55  | 837.43   | 217.59-2266.18   | Region       |
| Jamaica                          | 26.44 | 6.87-71.55  | 263      | 68.34-711.72     | Region       |
| Puerto Rico                      | 27.95 | 5.96-67.92  | 354.14   | 314.98-396       | Country      |
| Saint Lucia                      | 26.44 | 6.87-71.55  | 17.74    | 4.61-48          | Region       |
| Saint Vincent and the Grenadines | 26.44 | 6.87-71.55  | 10.39    | 2.7-28.11        | Region       |
| Suriname                         | 26.44 | 6.87-71.55  | 49.58    | 12.88-134.17     | Region       |
| Trinidad and Tobago              | 26.44 | 6.87-71.55  | 133.01   | 34.56-359.95     | Region       |
| Virgin Island (US)               | 26.44 | 6.87-71.55  | 9.48     | 2.46-25.66       | Region       |
| Latin America, Andean            | 22.66 | 4.88-60.35  | 4567.23  | 994.45-12067.6   | REGION       |
| Bolivia                          | 22.66 | 4.88-60.35  | 787.86   | 169.67-2098.3    | Region       |
| Ecuador                          | 20.93 | 6.41-46.31  | 1163.7   | 359.95-2623.65   | Country      |
| Peru                             | 22.66 | 4.88-60.35  | 2517.89  | 542.25-6705.85   | Region       |
| Latin America, central           | 16.64 | 7.01-31.99  | 13450.5  | 5636.45-25926.82 | REGION       |
| Colombia                         | 4.65  | 4.56-4.74   | 793.49   | 738.98-849       | Country      |
| Costa Rica                       | 16.64 | 7.01-31.99  | 302.23   | 127.32-581.02    | Region       |
| El Salvador                      | 16.64 | 7.01-31.99  | 309.29   | 130.29-594.6     | Region       |
| Guatemala                        | 16.64 | 7.01-31.99  | 796.02   | 335.34-1530.32   | Region       |
| Honduras                         | 16.64 | 7.01-31.99  | 477.6    | 201.2-918.18     | Region       |
| Mexico                           | 33.2  | 19.43-50.23 | 13397.02 | 7861.8-20318.6   | Country      |
| Nicaragua                        | 16.64 | 7.01-31.99  | 324.48   | 136.69-623.8     | Region       |
| Panama                           | 16.64 | 7.01-31.99  | 231.9    | 97.69-445.82     | Region       |

|                                         |       |             |           |                    |              |
|-----------------------------------------|-------|-------------|-----------|--------------------|--------------|
| Venezuela (Bolivarian Republic of)      | 21.64 | 6.71-48.07  | 1894.7    | 583.82-4163.9      | Country      |
| Latin America, tropical                 | 30.73 | 7.42-88.02  | 23331.6   | 5632.57-66719.02   | REGION       |
| Brazil                                  | 40.75 | 9.65-97.22  | 30030.75  | 7081.85-72145.35   | Country      |
| Paraguay                                | 30.73 | 7.42-88.02  | 686.45    | 165.75-1966.19     | Region       |
| North Africa and Middle East            | 19.23 | 4.82-48.94  | 37566.97  | 9441.95-95775.15   | SUPER-REGION |
| North Africa and the Middle East        | 22.18 | 9.97-40.96  | 43322.26  | 19503.35-80021.6   | REGION       |
| Afghanistan                             | 22.18 | 9.97-40.96  | 2054.89   | 923.68-3794.79     | Region       |
| Algeria                                 | 22.18 | 9.97-40.96  | 3056.14   | 1373.75-5643.81    | Region       |
| Bahrain                                 | 22.18 | 9.97-40.96  | 198       | 89-365.65          | Region       |
| Egypt                                   | 22.18 | 9.97-40.96  | 6511.5    | 2926.95-12024.85   | Region       |
| Iran (Islamic Republic of)              | 21.27 | 13.65-30.39 | 6152.26   | 3949.98-8816.5     | Country      |
| Iraq                                    | 22.18 | 9.97-40.96  | 2313.91   | 1040.11-4273.11    | Region       |
| Jordan                                  | 22.18 | 9.97-40.96  | 650.6     | 292.45-1201.47     | Region       |
| Kuwait                                  | 22.18 | 9.97-40.96  | 443.24    | 199.24-818.54      | Region       |
| Lebanon                                 | 22.18 | 9.97-40.96  | 500.14    | 224.81-923.61      | Region       |
| Libya                                   | 22.18 | 9.97-40.96  | 488.16    | 219.43-901.49      | Region       |
| Morocco                                 | 22.18 | 9.97-40.96  | 2601.34   | 1169.31-4803.91    | Region       |
| Palestine                               | 22.18 | 9.97-40.96  | 293.6     | 131.98-542.2       | Region       |
| Oman                                    | 22.18 | 9.97-40.96  | 595.99    | 267.9-1100.62      | Region       |
| Qatar                                   | 22.18 | 9.97-40.96  | 422.56    | 189.94-780.34      | Region       |
| Saudi Arabia                            | 16.73 | 5.29-37.55  | 2451.3    | 796.43-5469.77     | Country      |
| Sudan                                   | 22.18 | 9.97-40.96  | 2358.09   | 1059.97-4354.71    | Region       |
| Syrian Arab Republic                    | 22.18 | 9.97-40.96  | 1155.52   | 519.41-2133.91     | Region       |
| Sudan                                   | 22.18 | 9.97-40.96  | 2358.09   | 1059.97-4354.71    | Region       |
| Tunisia                                 | 22.18 | 9.97-40.96  | 881.23    | 396.12-1627.37     | Region       |
| Turkey                                  | 14.49 | 13.43-15.66 | 4034.56   | 3711.88-4393.2     | Country      |
| United Arab Emirates                    | 65.98 | 55.08-78.56 | 3886.6    | 3214.52-4660.2     | Country      |
| Yemen                                   | 22.18 | 9.97-40.96  | 1661.51   | 746.85-3068.32     | Region       |
| South Asia                              | 8.19  | 1.34-22.75  | 47835.69  | 7744.12-133187.45  | SUPER-REGION |
| Asia, south                             | 5.05  | 1.05-14.53  | 29473.91  | 6041.07-85030.5    | REGION       |
| Bangladesh                              | 5.05  | 1.05-14.53  | 2665.25   | 554.16-7668.54     | Region       |
| Bhutan                                  | 5.05  | 1.05-14.53  | 13.98     | 2.91-40.23         | Region       |
| India                                   | 2.35  | 1.12-4.11   | 10819.41  | 5142.82-18941.05   | Country      |
| Nepal                                   | 5.05  | 1.05-14.53  | 378.64    | 78.73-1089.44      | Region       |
| Pakistan                                | 5.05  | 1.05-14.53  | 3148.08   | 654.55-9057.74     | Region       |
| South East Asia, east Asia, and Oceania | 14.81 | 3.52-48.02  | 119532.78 | 28522.18-388084.02 | SUPER-REGION |
| Asia, east                              | 15.2  | 3.79-44.7   | 88111.19  | 22005.8-259525.1   | REGION       |
| China                                   | 12.82 | 12.66-12.99 | 73162.89  | 72167.95-74271.1   | Country      |
| Dem. People's Republic of Korea         | 15.2  | 3.79-44.7   | 1373.28   | 342.42-4038.53     | Region       |
| Asia, South East                        | 14.81 | 3.52-48.02  | 119532.78 | 28522.18-388084.02 | REGION       |
| Cambodia                                | 14.81 | 3.52-48.02  | 709.41    | 168.61-2300.19     | Super-region |
| Indonesia                               | 14.81 | 3.52-48.02  | 13239.48  | 3146.72-42927.74   | Super-region |
| Lao People's Democratic Republic        | 14.81 | 3.52-48.02  | 312.38    | 74.25-1012.86      | Super-region |
| Malaysia                                | 14.81 | 3.52-48.02  | 1680.53   | 399.42-5448.95     | Super-region |
| Maldives                                | 14.81 | 3.52-48.02  | 40.69     | 9.67-131.93        | Super-region |
| Mauritius                               | 14.81 | 3.52-48.02  | 69.68     | 16.56-225.93       | Super-region |
| Myanmar                                 | 14.81 | 3.52-48.02  | 2473.06   | 587.79-8018.66     | Super-region |
| Philippines                             | 14.81 | 3.52-48.02  | 4849.68   | 1152.66-15724.62   | Super-region |
| Seychelles                              | 14.81 | 3.52-48.02  | 5.21      | 1.24-16.88         | Super-region |
| Sri Lanka                               | 14.81 | 3.52-48.02  | 1017.65   | 241.87-3299.65     | Super-region |
| Thailand                                | 14.81 | 3.52-48.02  | 3817.16   | 907.25-12376.76    | Super-region |
| Timor-Leste                             | 14.81 | 3.52-48.02  | 50.6      | 12.03-164.05       | Super-region |
| Vietnam                                 | 14.81 | 3.52-48.02  | 4935.28   | 1173-16002.19      | Super-region |
| Oceania                                 | 14.81 | 3.52-48.02  | 119532.78 | 28522.18-388084.02 | REGION       |
| Fiji                                    | 14.81 | 3.52-48.02  | 41.8      | 9.93-135.52        | Super-region |

|                                  |       |            |           |                     |              |
|----------------------------------|-------|------------|-----------|---------------------|--------------|
| Guam                             | 14.81 | 3.52-48.02 | 8.49      | 2.02-27.53          | Super-region |
| Kiribati                         | 14.81 | 3.52-48.02 | 4.66      | 1.11-15.11          | Super-region |
| Marshall Islands                 | 14.81 | 3.52-48.02 | 2.07      | 0.49-6.71           | Super-region |
| Micronesia (Fed. States of)      | 14.81 | 3.52-48.02 | 5.06      | 1.2-16.42           | Super-region |
| Papua New Guinea                 | 14.81 | 3.52-48.02 | 365.34    | 86.83-1184.6        | Super-region |
| Samoa                            | 14.81 | 3.52-48.02 | 8.05      | 1.91-26.11          | Super-region |
| Solomon Islands                  | 14.81 | 3.52-48.02 | 25.37     | 6.03-82.25          | Super-region |
| Tonga                            | 14.81 | 3.52-48.02 | 4.13      | 0.98-13.4           | Super-region |
| Vanuatu                          | 14.81 | 3.52-48.02 | 11.72     | 2.79-38.01          | Super-region |
| Sub-Saharan Africa               | 13.04 | 4.73-32.29 | 337533.39 | 122642.17-836097.75 | SUPER-REGION |
| Sub-Saharan Africa, central      | 13.04 | 4.73-32.29 | 337533.39 | 122642.17-836097.75 | REGION       |
| Angola                           | 13.04 | 4.73-32.29 | 893.33    | 324.04-2212.08      | Global       |
| Central African Republic         | 13.04 | 4.73-32.29 | 135.28    | 49.07-334.99        | Global       |
| Congo                            | 13.04 | 4.73-32.29 | 172.09    | 62.42-426.13        | Global       |
| Democratic Republic of the Congo | 13.04 | 4.73-32.29 | 2511.94   | 911.15-6220.13      | Global       |
| Equatorial Guinea                | 13.04 | 4.73-32.29 | 59.69     | 21.65-147.81        | Global       |
| Gabon                            | 13.04 | 4.73-32.29 | 80.47     | 29.19-199.25        | Global       |
| Sub-Saharan Africa, eastern      | 13.04 | 4.73-32.29 | 337533.39 | 122642.17-836097.75 | REGION       |
| Burundi                          | 13.04 | 4.73-32.29 | 336.5     | 122.06-833.26       | Global       |
| Comoros                          | 13.04 | 4.73-32.29 | 28.74     | 10.43-71.17         | Global       |
| Djibouti                         | 13.04 | 4.73-32.29 | 41.84     | 15.18-103.6         | Global       |
| Eritrea                          | 13.04 | 4.73-32.29 | 109.82    | 39.84-271.95        | Global       |
| Ethiopia                         | 13.04 | 4.73-32.29 | 3616.46   | 1311.8-8955.17      | Global       |
| Kenya                            | 13.04 | 4.73-32.29 | 1725.81   | 626-4273.5          | Global       |
| Madagascar                       | 13.04 | 4.73-32.29 | 874.42    | 317.18-2165.26      | Global       |
| Malawi                           | 13.04 | 4.73-32.29 | 547.78    | 198.7-1356.42       | Global       |
| Mozambique                       | 13.04 | 4.73-32.29 | 850.59    | 308.53-2106.25      | Global       |
| Rwanda                           | 13.04 | 4.73-32.29 | 407.96    | 147.98-1010.2       | Global       |
| Somalia                          | 13.04 | 4.73-32.29 | 432.85    | 157.01-1071.84      | Global       |
| South Sudan                      | 13.04 | 4.73-32.29 | 346.16    | 125.56-857.17       | Global       |
| Uganda                           | 13.04 | 4.73-32.29 | 1211.53   | 439.46-3000.03      | Global       |
| United Republic of Tanzania      | 13.04 | 4.73-32.29 | 1754.35   | 636.36-4344.17      | Global       |
| Zambia                           | 13.04 | 4.73-32.29 | 516.06    | 187.19-1277.88      | Global       |
| Sub-Saharan Africa, southern     | 13.04 | 4.73-32.29 | 337533.39 | 122642.17-836097.75 | REGION       |
| Botswana                         | 13.04 | 4.73-32.29 | 81.86     | 29.69-202.71        | Global       |
| Lesotho                          | 13.04 | 4.73-32.29 | 78.61     | 28.51-194.65        | Global       |
| Namibia                          | 13.04 | 4.73-32.29 | 83.7      | 30.36-207.26        | Global       |
| South Africa                     | 13.04 | 4.73-32.29 | 2361.11   | 856.44-5846.64      | Global       |
| Eswatini                         | 13.04 | 4.73-32.29 | 37.33     | 13.54-92.44         | Global       |
| Zimbabwe                         | 13.04 | 4.73-32.29 | 410.57    | 148.93-1016.66      | Global       |
| Sub-Saharan Africa, western      | 13.04 | 4.73-32.29 | 337533.39 | 122642.17-836097.75 | REGION       |
| Benin                            | 13.04 | 4.73-32.29 | 367.88    | 133.44-910.96       | Global       |
| Burkina Faso                     | 13.04 | 4.73-32.29 | 593.16    | 215.16-1468.8       | Global       |
| Cote d'Ivoire                    | 13.04 | 4.73-32.29 | 827.39    | 300.12-2048.8       | Global       |
| Cameroon                         | 13.04 | 4.73-32.29 | 809.61    | 293.67-2004.79      | Global       |
| Cabo Verde                       | 13.04 | 4.73-32.29 | 22.9      | 8.3-56.69           | Global       |
| Chad                             | 13.04 | 4.73-32.29 | 448.06    | 162.52-1109.5       | Global       |
| Gambia                           | 13.04 | 4.73-32.29 | 69.6      | 25.25-172.35        | Global       |
| Ghana                            | 13.04 | 4.73-32.29 | 1076.64   | 390.53-2666         | Global       |
| Guinea                           | 13.04 | 4.73-32.29 | 357.74    | 129.76-885.85       | Global       |
| Guinea-Bissau                    | 13.04 | 4.73-32.29 | 57.86     | 20.99-143.26        | Global       |
| Liberia                          | 13.04 | 4.73-32.29 | 159.2     | 57.75-394.23        | Global       |
| Mali                             | 13.04 | 4.73-32.29 | 543.03    | 196.97-1344.67      | Global       |
| Mauritania                       | 13.04 | 4.73-32.29 | 151.16    | 54.83-374.3         | Global       |
| Niger                            | 13.04 | 4.73-32.29 | 614.42    | 222.87-1521.44      | Global       |
| Nigeria                          | 13.04 | 4.73-32.29 | 6193.17   | 2246.45-15335.7     | Global       |
| Sao Tome and Principe            | 13.04 | 4.73-32.29 | 6.62      | 2.4-16.4            | Global       |
| Senegal                          | 13.04 | 4.73-32.29 | 478.25    | 173.47-1184.25      | Global       |

|              |       |            |        |              |        |
|--------------|-------|------------|--------|--------------|--------|
| Sierra Leone | 13.04 | 4.73-32.29 | 251.67 | 91.29-623.19 | Global |
| Togo         | 13.04 | 4.73-32.29 | 258.84 | 93.89-640.94 | Global |

**Table S21. Estimated period prevalence of SLE diagnosed by physician/dermatologist for female.**

| Country/Region/Super-region                      | Expected Prevalence | 95% Confidence Interval of Prevalence | Expected Patient Number | 95% Confidence Interval of Patient Number | Hierarchy of Region in Estimate |
|--------------------------------------------------|---------------------|---------------------------------------|-------------------------|-------------------------------------------|---------------------------------|
| Global                                           | 78.73               | 28.61-196.33                          | 3042273.89              | 1105724.22-7588738.25                     | GLOBAL                          |
| Central Europe, eastern Europe, and central Asia | 59.11               | 20.2-122.66                           | 129066.22               | 44196.07-267880.9                         | SUPER-REGION                    |
| Asia, central                                    | 39.46               | 11.76-98.13                           | 18912.67                | 5671.28-47158.6                           | REGION                          |
| Armenia                                          | 39.46               | 11.76-98.13                           | 619.25                  | 184.55-1539.96                            | Region                          |
| Azerbaijan                                       | 39.46               | 11.76-98.13                           | 2002.36                 | 596.75-4979.53                            | Region                          |
| Georgia                                          | 39.46               | 11.76-98.13                           | 823.86                  | 245.53-2048.8                             | Region                          |
| Kazakhstan                                       | 24.82               | 18.64-32.19                           | 2400.49                 | 1784.3-3146.1                             | Country                         |
| Kyrgyzstan                                       | 39.46               | 11.76-98.13                           | 1300.94                 | 387.71-3235.22                            | Region                          |
| Mongolia                                         | 39.46               | 11.76-98.13                           | 656.31                  | 195.6-1632.13                             | Region                          |
| Tajikistan                                       | 39.46               | 11.76-98.13                           | 1867.2                  | 556.47-4643.4                             | Region                          |
| Turkmenistan                                     | 39.46               | 11.76-98.13                           | 1208.19                 | 360.07-3004.56                            | Region                          |
| Uzbekistan                                       | 39.46               | 11.76-98.13                           | 6618.19                 | 1972.37-16458.26                          | Region                          |
| Europe, central                                  | 85.36               | 23.74-228.57                          | 49798.42                | 13922.68-133111.72                        | REGION                          |
| Albania                                          | 85.36               | 23.74-228.57                          | 1206.18                 | 335.46-3229.81                            | Region                          |
| Bosnia and Herzegovina                           | 85.36               | 23.74-228.57                          | 1428.99                 | 397.43-3826.44                            | Region                          |
| Bulgaria                                         | 85.36               | 23.74-228.57                          | 3050.95                 | 848.52-8169.59                            | Region                          |
| Croatia                                          | 85.36               | 23.74-228.57                          | 1814.57                 | 504.66-4858.92                            | Region                          |
| Czechia                                          | 85.36               | 23.74-228.57                          | 4640.3                  | 1290.54-12425.41                          | Region                          |
| Hungary                                          | 102.95              | 102.07-103.95                         | 5212.16                 | 5067.98-5354.1                            | Country                         |
| Montenegro                                       | 85.36               | 23.74-228.57                          | 271.01                  | 75.37-725.69                              | Region                          |
| Poland                                           | 85.36               | 23.74-228.57                          | 16649.39                | 4630.46-44582.36                          | Region                          |
| Romania                                          | 85.36               | 23.74-228.57                          | 8436.21                 | 2346.25-22589.79                          | Region                          |
| Serbia                                           | 85.36               | 23.74-228.57                          | 3805.04                 | 1058.24-10188.82                          | Region                          |
| Slovakia                                         | 85.36               | 23.74-228.57                          | 2390.99                 | 664.97-6402.39                            | Region                          |
| Slovenia                                         | 85.36               | 23.74-228.57                          | 890.77                  | 247.74-2385.23                            | Region                          |
| North Macedonia                                  | 85.36               | 23.74-228.57                          | 888.8                   | 247.19-2379.96                            | Region                          |
| Europe, eastern                                  | 58.11               | 17.15-169.36                          | 51774.85                | 15502.43-129070.2                         | REGION                          |
| Belarus                                          | 58.11               | 17.15-169.36                          | 2934.32                 | 866-8551.99                               | Region                          |
| Estonia                                          | 126.74              | 35.35-383.5                           | 712.91                  | 189.95-1771.55                            | Country                         |
| Latvia                                           | 58.11               | 17.15-169.36                          | 590.62                  | 174.31-1721.35                            | Region                          |
| Lithuania                                        | 109.59              | 30.38-338.51                          | 1293.71                 | 336.98-3372.02                            | Country                         |
| Republic of Moldova                              | 58.11               | 17.15-169.36                          | 1221.44                 | 360.48-3559.85                            | Region                          |
| Russia                                           | 17.58               | 4.87-54.78                            | 11076.47                | 2965.6-29180.07                           | Country                         |
| Ukraine                                          | 29.87               | 7.78-93.43                            | 5673.47                 | 1393.32-15527.07                          | Country                         |
| High income                                      | 58.72               | 24.07-104.47                          | 322972.1                | 132777.12-575264.9                        | SUPER-REGION                    |
| Asia Pacific, high income                        | 55.54               | 21.43-107.62                          | 51790.21                | 20062.72-100440.75                        | REGION                          |
| Brunei Darussalam                                | 55.54               | 21.43-107.62                          | 116.91                  | 45.11-226.53                              | Region                          |
| Japan                                            | 46.18               | 41.2-51.16                            | 29857.36                | 26645.8-33074.42                          | Country                         |
| Republic of Korea                                | 47.06               | 46.78-47.39                           | 12050.07                | 11813.9-12286.05                          | Country                         |
| Singapore                                        | 55.54               | 21.43-107.62                          | 1548.17                 | 597.36-2999.89                            | Region                          |
| Australasia                                      | 39.4                | 10.48-96.23                           | 6008.06                 | 1580.65-14772.97                          | REGION                          |
| Australia                                        | 19.14               | 15.12-23.67                           | 2451.39                 | 1919-3033.12                              | Country                         |
| New Zealand                                      | 39.4                | 10.48-96.23                           | 965.91                  | 256.92-2359.12                            | Region                          |
| Europe, western                                  | 105.96              | 67.22-154                             | 233904.25               | 148419.5-339836.75                        | REGION                          |
| Austria                                          | 105.96              | 67.22-154                             | 4837.88                 | 3069.1-7031.27                            | Region                          |
| Belgium                                          | 105.96              | 67.22-154                             | 6191.98                 | 3928.13-8999.29                           | Region                          |
| Cyprus                                           | 105.96              | 67.22-154                             | 639.75                  | 405.85-929.8                              | Region                          |
| Denmark                                          | 109.79              | 105.14-114.08                         | 3198.65                 | 3028.92-3370                              | Country                         |

|                                         |        |               |           |                     |              |
|-----------------------------------------|--------|---------------|-----------|---------------------|--------------|
| <b>Finland</b>                          | 105.96 | 67.22-154     | 2974.82   | 1887.2-4323.54      | Region       |
| <b>France</b>                           | 70.4   | 69.48-71.37   | 23703.94  | 23264.93-24166.08   | Country      |
| <b>Germany</b>                          | 51.6   | 50.54-52.78   | 21854.07  | 21310-22411.13      | Country      |
| <b>Greece</b>                           | 69.77  | 65.55-74.06   | 3703.15   | 3478.98-3961        | Country      |
| <b>Iceland</b>                          | 105.96 | 67.22-154     | 179.93    | 114.14-261.5        | Region       |
| <b>Ireland</b>                          | 105.96 | 67.22-154     | 2634.09   | 1671.04-3828.33     | Region       |
| <b>Israel</b>                           | 105.96 | 67.22-154     | 4605.69   | 2921.81-6693.81     | Region       |
| <b>Italy</b>                            | 103.63 | 92.15-116.03  | 32138.89  | 28570.68-35937.58   | Country      |
| <b>Luxembourg</b>                       | 105.96 | 67.22-154     | 327.77    | 207.93-476.38       | Region       |
| <b>Malta</b>                            | 72.34  | 59.09-86.48   | 159.35    | 120-200             | Country      |
| <b>Netherlands</b>                      | 199.5  | 154.43-252.26 | 17149.56  | 13301.35-21802.05   | Country      |
| <b>Norway</b>                           | 160.3  | 143.16-178.64 | 4298.62   | 3838.98-4794.1      | Country      |
| <b>Portugal</b>                         | 105.96 | 67.22-154     | 5691.21   | 3610.45-8271.48     | Region       |
| <b>Spain</b>                            | 132.32 | 119.54-146.25 | 31450.49  | 28394.05-34685.55   | Country      |
| <b>Sweden</b>                           | 251.61 | 244.64-258.45 | 12679.4   | 12259-13090.15      | Country      |
| <b>Switzerland</b>                      | 105.96 | 67.22-154     | 4619.42   | 2930.51-6713.76     | Region       |
| <b>United Kingdom</b>                   | 184.77 | 181.11-188.49 | 63434.86  | 62004.22-64892.02   | Country      |
| <b>Latin America, southern</b>          | 29.51  | 5.33-84.03    | 10220.82  | 1850.23-29062.22    | REGION       |
| <b>Argentina</b>                        | 8.87   | 7.42-10.66    | 2055.93   | 1686.92-2490.1      | Country      |
| <b>Chile</b>                            | 29.51  | 5.33-84.03    | 2858.81   | 516.35-8140.48      | Region       |
| <b>Uruguay</b>                          | 29.51  | 5.33-84.03    | 529.25    | 95.59-1507.04       | Region       |
| <b>North America, high income</b>       | 71.56  | 28.06-147.57  | 133210.48 | 51923.65-274114.5   | REGION       |
| <b>Canada</b>                           | 50.72  | 49.57-51.95   | 9640.92   | 9358.97-9952.2      | Country      |
| <b>United States of America</b>         | 95.67  | 94.42-96.91   | 159913.93 | 157566.57-162205.22 | Country      |
| <b>Latin America and Caribbean</b>      | 126.62 | 45.36-308.05  | 375741.6  | 135261.35-914361.45 | SUPER-REGION |
| <b>Caribbean</b>                        | 161.63 | 42.12-436.62  | 48357.28  | 19050.4-102728.5    | REGION       |
| <b>Antigua and Barbuda</b>              | 161.63 | 42.12-436.62  | 81.88     | 21.34-221.18        | Region       |
| <b>Bahamas</b>                          | 161.63 | 42.12-436.62  | 326.74    | 85.15-882.63        | Region       |
| <b>Barbados</b>                         | 285.17 | 61.9-683.25   | 522.56    | 470.98-572.05       | Country      |
| <b>Belize</b>                           | 161.63 | 42.12-436.62  | 323.03    | 84.18-872.61        | Region       |
| <b>Cuba</b>                             | 266.62 | 46.34-754.49  | 19304.21  | 7456.5-39399.37     | Country      |
| <b>Dominican Republic</b>               | 161.63 | 42.12-436.62  | 8773.67   | 2286.38-23700.79    | Region       |
| <b>Grenada</b>                          | 161.63 | 42.12-436.62  | 90.27     | 23.52-243.86        | Region       |
| <b>Guyana</b>                           | 161.63 | 42.12-436.62  | 631.87    | 164.66-1706.9       | Region       |
| <b>Haiti</b>                            | 161.63 | 42.12-436.62  | 9335.5    | 2432.79-25218.51    | Region       |
| <b>Jamaica</b>                          | 161.63 | 42.12-436.62  | 2410.63   | 628.2-6511.97       | Region       |
| <b>Puerto Rico</b>                      | 192.87 | 41.53-465.95  | 3583.13   | 3327.95-3836.12     | Country      |
| <b>Saint Lucia</b>                      | 161.63 | 42.12-436.62  | 150.64    | 39.26-406.93        | Region       |
| <b>Saint Vincent and the Grenadines</b> | 161.63 | 42.12-436.62  | 88.45     | 23.05-238.94        | Region       |
| <b>Suriname</b>                         | 161.63 | 42.12-436.62  | 471.63    | 122.9-1274.03       | Region       |
| <b>Trinidad and Tobago</b>              | 161.63 | 42.12-436.62  | 1145.12   | 298.41-3093.39      | Region       |
| <b>Virgin Island (US)</b>               | 161.63 | 42.12-436.62  | 88.59     | 23.09-239.32        | Region       |
| <b>Latin America, Andean</b>            | 133.74 | 28.82-355.32  | 41760.2   | 8998.45-110843.97   | REGION       |
| <b>Bolivia</b>                          | 133.74 | 28.82-355.32  | 7775.6    | 1675.59-20658.19    | Region       |
| <b>Ecuador</b>                          | 121.9  | 37.41-269.95  | 10750.76  | 3277.4-23965.67     | Country      |
| <b>Peru</b>                             | 133.74 | 28.82-355.32  | 22190.34  | 4781.86-58955.22    | Region       |
| <b>Latin America, central</b>           | 99.37  | 41.99-190.79  | 130918.09 | 55197-251205.3      | REGION       |
| <b>Colombia</b>                         | 29.16  | 28.69-29.68   | 7554.41   | 7347.98-7766        | Country      |
| <b>Costa Rica</b>                       | 99.37  | 41.99-190.79  | 2532.55   | 1070.16-4862.49     | Region       |
| <b>El Salvador</b>                      | 99.37  | 41.99-190.79  | 3427.86   | 1448.48-6581.48     | Region       |
| <b>Guatemala</b>                        | 99.37  | 41.99-190.79  | 9030.88   | 3816.11-17339.26    | Region       |
| <b>Honduras</b>                         | 99.37  | 41.99-190.79  | 4924.17   | 2080.77-9454.38     | Region       |
| <b>Mexico</b>                           | 198.9  | 116.49-299.49 | 130986.83 | 76471.6-197989.87   | Country      |
| <b>Nicaragua</b>                        | 99.37  | 41.99-190.79  | 3338.23   | 1410.61-6409.39     | Region       |
| <b>Panama</b>                           | 99.37  | 41.99-190.79  | 2140.68   | 904.57-4110.1       | Region       |

|                                         |        |               |            |                      |              |
|-----------------------------------------|--------|---------------|------------|----------------------|--------------|
| Venezuela (Bolivarian Republic of)      | 127.16 | 39.68-282.58  | 18374.69   | 5656.8-40754.27      | Country      |
| Latin America, tropical                 | 195.94 | 47.25-554.5   | 218701.96  | 52674.05-619522.72   | REGION       |
| Brazil                                  | 260.62 | 61.58-621.39  | 281762.81  | 66454.38-670851      | Country      |
| Paraguay                                | 195.94 | 47.25-554.5   | 6873.48    | 1657.51-19451.6      | Region       |
| North Africa and Middle East            | 106.61 | 27.1-272.08   | 322229.15  | 81908.77-822269.45   | SUPER-REGION |
| North Africa and the Middle East        | 123.63 | 55.56-225.54  | 373680.36  | 167892.85-682087.15  | REGION       |
| Afghanistan                             | 123.63 | 55.56-225.54  | 23430.42   | 10529.76-42744.45    | Region       |
| Algeria                                 | 123.63 | 55.56-225.54  | 26823.73   | 12054.73-48934.92    | Region       |
| Bahrain                                 | 123.63 | 55.56-225.54  | 743.14     | 333.97-1355.73       | Region       |
| Egypt                                   | 123.63 | 55.56-225.54  | 62594.8    | 28130.45-114192.6    | Region       |
| Iran (Islamic Republic of)              | 130.96 | 84.18-186.89  | 54460.09   | 35041.15-77879.67    | Country      |
| Iraq                                    | 123.63 | 55.56-225.54  | 24558.6    | 11036.77-44802.61    | Region       |
| Jordan                                  | 123.63 | 55.56-225.54  | 6227.42    | 2798.64-11360.77     | Region       |
| Kuwait                                  | 123.63 | 55.56-225.54  | 2047.46    | 920.14-3735.21       | Region       |
| Lebanon                                 | 123.63 | 55.56-225.54  | 4190.53    | 1883.25-7644.84      | Region       |
| Libya                                   | 123.63 | 55.56-225.54  | 4206.54    | 1890.44-7674.05      | Region       |
| Morocco                                 | 123.63 | 55.56-225.54  | 22987.3    | 10330.62-41936.06    | Region       |
| Palestine                               | 123.63 | 55.56-225.54  | 3108.6     | 1397.02-5671.06      | Region       |
| Oman                                    | 123.63 | 55.56-225.54  | 2146.46    | 964.63-3915.82       | Region       |
| Qatar                                   | 123.63 | 55.56-225.54  | 885.03     | 397.74-1614.56       | Region       |
| Saudi Arabia                            | 96.57  | 30.72-214.33  | 14181.7    | 4530.18-31460.05     | Country      |
| Sudan                                   | 123.63 | 55.56-225.54  | 27126.65   | 12190.87-49487.54    | Region       |
| Syrian Arab Republic                    | 123.63 | 55.56-225.54  | 10805.83   | 4856.2-19713.24      | Region       |
| Sudan                                   | 123.63 | 55.56-225.54  | 27126.65   | 12190.87-49487.54    | Region       |
| Tunisia                                 | 123.63 | 55.56-225.54  | 7365.48    | 3310.09-13436.94     | Region       |
| Turkey                                  | 89.18  | 82.63-96.39   | 38085.1    | 35256.9-41108.05     | Country      |
| United Arab Emirates                    | 410.3  | 341.95-487.56 | 12533.12   | 10441.48-14936.03    | Country      |
| Yemen                                   | 123.63 | 55.56-225.54  | 18298.39   | 8223.4-33382.02      | Region       |
| South Asia                              | 47.39  | 7.74-132.22   | 411202.18  | 66917.75-1146671.97  | SUPER-REGION |
| Asia, south                             | 29.21  | 6.04-84.23    | 253436.57  | 52558.05-731105.17   | REGION       |
| Bangladesh                              | 29.21  | 6.04-84.23    | 23784.67   | 4918.16-68585.5      | Region       |
| Bhutan                                  | 29.21  | 6.04-84.23    | 105.59     | 21.83-304.47         | Region       |
| India                                   | 13.8   | 6.56-24.19    | 91456.88   | 43392.23-160111.05   | Country      |
| Nepal                                   | 29.21  | 6.04-84.23    | 4611.76    | 953.61-13298.48      | Region       |
| Pakistan                                | 29.21  | 6.04-84.23    | 31318.98   | 6476.09-90311.45     | Region       |
| South East Asia, east Asia, and Oceania | 96.62  | 22.89-314.96  | 1043426.95 | 248076.4-3402748.58  | SUPER-REGION |
| Asia, east                              | 102.76 | 25.83-301.29  | 750729.5   | 188586.55-2202270.28 | REGION       |
| China                                   | 86.78  | 86.06-87.57   | 622525.93  | 616987.82-628177.78  | Country      |
| Dem. People's Republic of Korea         | 102.76 | 25.83-301.29  | 13533.69   | 3401.86-39680.46     | Region       |
| Asia, South East                        | 96.62  | 22.89-314.96  | 1043426.95 | 248076.4-3402748.58  | REGION       |
| Cambodia                                | 96.62  | 22.89-314.96  | 8267.31    | 1958.59-26949.6      | Super-region |
| Indonesia                               | 96.62  | 22.89-314.96  | 131214.38  | 31085.67-427730.08   | Super-region |
| Lao People's Democratic Republic        | 96.62  | 22.89-314.96  | 3501.26    | 829.48-11413.35      | Super-region |
| Malaysia                                | 96.62  | 22.89-314.96  | 15203.11   | 3601.73-49558.8      | Super-region |
| Maldives                                | 96.62  | 22.89-314.96  | 190.93     | 45.23-622.39         | Super-region |
| Mauritius                               | 96.62  | 22.89-314.96  | 622.41     | 147.45-2028.93       | Super-region |
| Myanmar                                 | 96.62  | 22.89-314.96  | 27236.63   | 6452.56-88785.43     | Super-region |
| Philippines                             | 96.62  | 22.89-314.96  | 52706.87   | 12486.65-171812.83   | Super-region |
| Seychelles                              | 96.62  | 22.89-314.96  | 46.28      | 10.96-150.86         | Super-region |
| Sri Lanka                               | 96.62  | 22.89-314.96  | 10768.98   | 2551.25-35104.52     | Super-region |
| Thailand                                | 96.62  | 22.89-314.96  | 34616.88   | 8201-112843.43       | Super-region |
| Timor-Leste                             | 96.62  | 22.89-314.96  | 630.15     | 149.29-2054.16       | Super-region |

|                                  |       |              |            |                       |              |
|----------------------------------|-------|--------------|------------|-----------------------|--------------|
| Vietnam                          | 96.62 | 22.89-314.96 | 47075.43   | 11152.52-153455.58    | Super-region |
| Oceania                          | 96.62 | 22.89-314.96 | 1043426.95 | 248076.4-3402748.58   | REGION       |
| Fiji                             | 96.62 | 22.89-314.96 | 427.47     | 101.27-1393.46        | Super-region |
| Guam                             | 96.62 | 22.89-314.96 | 80.81      | 19.14-263.41          | Super-region |
| Kiribati                         | 96.62 | 22.89-314.96 | 58.65      | 13.89-191.18          | Super-region |
| Marshall Islands                 | 96.62 | 22.89-314.96 | 26.32      | 6.23-85.79            | Super-region |
| Micronesia (Fed. States of)      | 96.62 | 22.89-314.96 | 54.63      | 12.94-178.08          | Super-region |
| Papua New Guinea                 | 96.62 | 22.89-314.96 | 4230.95    | 1002.34-13791.95      | Super-region |
| Samoa                            | 96.62 | 22.89-314.96 | 92.47      | 21.91-301.44          | Super-region |
| Solomon Islands                  | 96.62 | 22.89-314.96 | 326.2      | 77.28-1063.35         | Super-region |
| Tonga                            | 96.62 | 22.89-314.96 | 51.01      | 12.08-166.28          | Super-region |
| Vanuatu                          | 96.62 | 22.89-314.96 | 146.34     | 34.67-477.04          | Super-region |
| Sub-Saharan Africa               | 78.73 | 28.61-196.33 | 3042273.89 | 1105724.22-7588738.25 | SUPER-REGION |
| Sub-Saharan Africa, central      | 78.73 | 28.61-196.33 | 3042273.89 | 1105724.22-7588738.25 | REGION       |
| Angola                           | 78.73 | 28.61-196.33 | 13073.41   | 4750.8-32601.32       | Global       |
| Central African Republic         | 78.73 | 28.61-196.33 | 1917.64    | 696.86-4782.05        | Global       |
| Congo                            | 78.73 | 28.61-196.33 | 2174.06    | 790.04-5421.48        | Global       |
| Democratic Republic of the Congo | 78.73 | 28.61-196.33 | 35311.26   | 12831.9-88056.15      | Global       |
| Equatorial Guinea                | 78.73 | 28.61-196.33 | 490.18     | 178.13-1222.36        | Global       |
| Gabon                            | 78.73 | 28.61-196.33 | 860.42     | 312.67-2145.64        | Global       |
| Sub-Saharan Africa, eastern      | 78.73 | 28.61-196.33 | 3042273.89 | 1105724.22-7588738.25 | REGION       |
| Burundi                          | 78.73 | 28.61-196.33 | 4716.64    | 1714-11761.94         | Global       |
| Comoros                          | 78.73 | 28.61-196.33 | 339.28     | 123.29-846.07         | Global       |
| Djibouti                         | 78.73 | 28.61-196.33 | 369.25     | 134.18-920.8          | Global       |
| Eritrea                          | 78.73 | 28.61-196.33 | 1392.62    | 506.07-3472.8         | Global       |
| Ethiopia                         | 78.73 | 28.61-196.33 | 45227.62   | 16435.44-112784.68    | Global       |
| Kenya                            | 78.73 | 28.61-196.33 | 21298.64   | 7739.8-53112.7        | Global       |
| Madagascar                       | 78.73 | 28.61-196.33 | 10924.84   | 3970.02-27243.41      | Global       |
| Malawi                           | 78.73 | 28.61-196.33 | 7633.59    | 2774-19035.99         | Global       |
| Mozambique                       | 78.73 | 28.61-196.33 | 12649.7    | 4596.82-31544.72      | Global       |
| Rwanda                           | 78.73 | 28.61-196.33 | 5184.19    | 1883.9-12927.89       | Global       |
| Somalia                          | 78.73 | 28.61-196.33 | 6274.08    | 2279.96-15645.75      | Global       |
| South Sudan                      | 78.73 | 28.61-196.33 | 4401.56    | 1599.5-10976.22       | Global       |
| Uganda                           | 78.73 | 28.61-196.33 | 18260.96   | 6635.92-45537.58      | Global       |
| United Republic of Tanzania      | 78.73 | 28.61-196.33 | 23526.96   | 8549.55-58669.49      | Global       |
| Zambia                           | 78.73 | 28.61-196.33 | 7306.89    | 2655.28-18221.28      | Global       |
| Sub-Saharan Africa, southern     | 78.73 | 28.61-196.33 | 3042273.89 | 1105724.22-7588738.25 | REGION       |
| Botswana                         | 78.73 | 28.61-196.33 | 954.62     | 346.9-2380.55         | Global       |
| Lesotho                          | 78.73 | 28.61-196.33 | 854.45     | 310.5-2130.75         | Global       |
| Namibia                          | 78.73 | 28.61-196.33 | 1030.76    | 374.57-2570.41        | Global       |
| South Africa                     | 78.73 | 28.61-196.33 | 23691.93   | 8609.5-59080.87       | Global       |
| Eswatini                         | 78.73 | 28.61-196.33 | 464.45     | 168.78-1158.2         | Global       |
| Zimbabwe                         | 78.73 | 28.61-196.33 | 6118.03    | 2223.25-15256.61      | Global       |
| Sub-Saharan Africa, western      | 78.73 | 28.61-196.33 | 3042273.89 | 1105724.22-7588738.25 | REGION       |
| Benin                            | 78.73 | 28.61-196.33 | 4778.06    | 1736.32-11915.1       | Global       |
| Burkina Faso                     | 78.73 | 28.61-196.33 | 8234.03    | 2992.2-20533.3        | Global       |
| Cote d'Ivoire                    | 78.73 | 28.61-196.33 | 10296.23   | 3741.59-25675.83      | Global       |
| Cameroon                         | 78.73 | 28.61-196.33 | 10446.52   | 3796.2-26050.61       | Global       |
| Cabo Verde                       | 78.73 | 28.61-196.33 | 217.98     | 79.21-543.57          | Global       |
| Chad                             | 78.73 | 28.61-196.33 | 6476.07    | 2353.36-16149.46      | Global       |
| Gambia                           | 78.73 | 28.61-196.33 | 959.03     | 348.51-2391.54        | Global       |

|                       |       |              |          |                    |        |
|-----------------------|-------|--------------|----------|--------------------|--------|
| Ghana                 | 78.73 | 28.61-196.33 | 12063.75 | 4383.89-30083.52   | Global |
| Guinea                | 78.73 | 28.61-196.33 | 5337.54  | 1939.63-13310.3    | Global |
| Guinea-Bissau         | 78.73 | 28.61-196.33 | 791.48   | 287.62-1973.71     | Global |
| Liberia               | 78.73 | 28.61-196.33 | 1980.17  | 719.58-4937.97     | Global |
| Mali                  | 78.73 | 28.61-196.33 | 7956.18  | 2891.23-19840.43   | Global |
| Mauritania            | 78.73 | 28.61-196.33 | 1822.34  | 662.23-4544.4      | Global |
| Niger                 | 78.73 | 28.61-196.33 | 9476.31  | 3443.63-23631.2    | Global |
| Nigeria               | 78.73 | 28.61-196.33 | 80044.74 | 29087.77-199608.58 | Global |
| Sao Tome and Principe | 78.73 | 28.61-196.33 | 86.2     | 31.32-214.95       | Global |
| Senegal               | 78.73 | 28.61-196.33 | 6749.63  | 2452.78-16831.65   | Global |
| Sierra Leone          | 78.73 | 28.61-196.33 | 3145.84  | 1143.18-7844.82    | Global |
| Togo                  | 78.73 | 28.61-196.33 | 3274.64  | 1189.99-8166.02    | Global |

**Table S22. Estimated period prevalence of SLE diagnosed by physician/dermatologist for female adults.**

| Country/Region/Super-region                      | Expected Prevalence | 95% Confidence Interval of Prevalence | Expected Patient Number | 95% Confidence Interval of Patient Number | Hierarchy of Region in Estimate |
|--------------------------------------------------|---------------------|---------------------------------------|-------------------------|-------------------------------------------|---------------------------------|
| Global                                           | 108.75              | 39.5-270.58                           | 2837376.36              | 1031162.53-7061172.6                      | GLOBAL                          |
| Central Europe, eastern Europe, and central Asia | 73.62               | 25.16-152.72                          | 123482.94               | 42289.02-256055.05                        | SUPER-REGION                    |
| Asia, central                                    | 55.89               | 16.65-138.95                          | 17524.41                | 5242.1-43721.6                            | REGION                          |
| Armenia                                          | 55.89               | 16.65-138.95                          | 670.77                  | 199.83-1667.63                            | Region                          |
| Azerbaijan                                       | 55.89               | 16.65-138.95                          | 2048.26                 | 610.19-5092.24                            | Region                          |
| Georgia                                          | 55.89               | 16.65-138.95                          | 893.38                  | 266.15-2221.07                            | Region                          |
| Kazakhstan                                       | 34.55               | 25.92-44.67                           | 2235.19                 | 1662.55-2933.02                           | Country                         |
| Kyrgyzstan                                       | 55.89               | 16.65-138.95                          | 1124.6                  | 335.03-2795.91                            | Region                          |
| Mongolia                                         | 55.89               | 16.65-138.95                          | 587.65                  | 175.06-1460.97                            | Region                          |
| Tajikistan                                       | 55.89               | 16.65-138.95                          | 1457.81                 | 434.29-3624.31                            | Region                          |
| Turkmenistan                                     | 55.89               | 16.65-138.95                          | 1065.55                 | 317.43-2649.09                            | Region                          |
| Uzbekistan                                       | 55.89               | 16.65-138.95                          | 6061.24                 | 1805.68-15069.05                          | Region                          |
| Europe, central                                  | 101.97              | 28.34-273.14                          | 48089.56                | 13427.8-128620.05                         | REGION                          |
| Albania                                          | 101.97              | 28.34-273.14                          | 1106.28                 | 307.46-2963.33                            | Region                          |
| Bosnia and Herzegovina                           | 101.97              | 28.34-273.14                          | 1388.34                 | 385.85-3718.86                            | Region                          |
| Bulgaria                                         | 101.97              | 28.34-273.14                          | 2983.56                 | 829.21-7991.86                            | Region                          |
| Croatia                                          | 101.97              | 28.34-273.14                          | 1774.69                 | 493.23-4753.75                            | Region                          |
| Czechia                                          | 101.97              | 28.34-273.14                          | 4463.91                 | 1240.63-11957.17                          | Region                          |
| Hungary                                          | 121.62              | 120.56-122.77                         | 5046.06                 | 4901.98-5185.05                           | Country                         |
| Montenegro                                       | 101.97              | 28.34-273.14                          | 249.36                  | 69.3-667.95                               | Region                          |
| Poland                                           | 101.97              | 28.34-273.14                          | 16156.92                | 4490.41-43278.42                          | Region                          |
| Romania                                          | 101.97              | 28.34-273.14                          | 8104.96                 | 2252.57-21710.19                          | Region                          |
| Serbia                                           | 101.97              | 28.34-273.14                          | 3631.29                 | 1009.23-9726.88                           | Region                          |
| Slovakia                                         | 101.97              | 28.34-273.14                          | 2302.64                 | 639.96-6167.92                            | Region                          |
| Slovenia                                         | 101.97              | 28.34-273.14                          | 862.9                   | 239.82-2311.39                            | Region                          |
| North Macedonia                                  | 101.97              | 28.34-273.14                          | 834.32                  | 231.88-2234.85                            | Region                          |
| Europe, eastern                                  | 70.31               | 20.75-204.73                          | 49859.72                | 14929.62-124216.55                        | REGION                          |
| Belarus                                          | 70.31               | 20.75-204.73                          | 2839.19                 | 837.91-8267.22                            | Region                          |
| Estonia                                          | 152.01              | 42.42-459.85                          | 687.98                  | 182.95-1717.62                            | Country                         |
| Latvia                                           | 70.31               | 20.75-204.73                          | 579.68                  | 171.08-1687.92                            | Region                          |
| Lithuania                                        | 129.46              | 35.9-399.81                           | 1252.46                 | 325.98-3259.4                             | Country                         |
| Republic of Moldova                              | 70.31               | 20.75-204.73                          | 1190.26                 | 351.27-3465.81                            | Region                          |
| Russia                                           | 21.42               | 5.93-66.73                            | 10650.97                | 2860.62-28047.23                          | Country                         |
| Ukraine                                          | 35.46               | 9.24-110.83                           | 5486.06                 | 1346.05-15003.55                          | Country                         |
| High income                                      | 71.75               | 29.44-127.69                          | 310346.29               | 127717.5-552881.6                         | SUPER-REGION                    |
| Asia Pacific, high income                        | 64.53               | 24.91-125.03                          | 50311.88                | 19507.8-97539.2                           | REGION                          |
| Brunei Darussalam                                | 64.53               | 24.91-125.03                          | 94.68                   | 36.55-183.45                              | Region                          |
| Japan                                            | 53.52               | 47.77-59.28                           | 29020.65                | 25901.82-32144.1                          | Country                         |
| Republic of Korea                                | 54.92               | 54.58-55.29                           | 11695.6                 | 11470.9-11923.05                          | Country                         |



|                                         |        |               |           |                     |              |
|-----------------------------------------|--------|---------------|-----------|---------------------|--------------|
| <b>Singapore</b>                        | 64.53  | 24.91-125.03  | 1490.9    | 575.52-2888.69      | Region       |
| <b>Australasia</b>                      | 49.78  | 13.25-121.5   | 5729.18   | 1512.28-14070.92    | REGION       |
| <b>Australia</b>                        | 24.18  | 19.08-29.9    | 2338.01   | 1828.97-2893.02     | Country      |
| <b>New Zealand</b>                      | 49.78  | 13.25-121.5   | 919.37    | 244.71-2243.94      | Region       |
| <b>Europe, western</b>                  | 127.79 | 81.16-185.92  | 225406.45 | 143017.25-327455.88 | REGION       |
| <b>Austria</b>                          | 127.79 | 81.16-185.92  | 4751.27   | 3017.55-6912.56     | Region       |
| <b>Belgium</b>                          | 127.79 | 81.16-185.92  | 5846.99   | 3713.45-8506.7      | Region       |
| <b>Cyprus</b>                           | 127.79 | 81.16-185.92  | 602.17    | 382.44-876.09       | Region       |
| <b>Denmark</b>                          | 134.3  | 128.61-139.48 | 3072.92   | 2901.88-3238        | Country      |
| <b>Finland</b>                          | 127.79 | 81.16-185.92  | 2854.5    | 1812.91-4152.97     | Region       |
| <b>France</b>                           | 86.93  | 85.82-88.15   | 22722.22  | 22301.98-23159.07   | Country      |
| <b>Germany</b>                          | 60.93  | 59.65-62.3    | 21157.88  | 20634.83-21712.5    | Country      |
| <b>Greece</b>                           | 82.25  | 77.27-87.33   | 3586.67   | 3370.98-3836.05     | Country      |
| <b>Iceland</b>                          | 127.79 | 81.16-185.92  | 162.13    | 102.97-235.88       | Region       |
| <b>Ireland</b>                          | 127.79 | 81.16-185.92  | 2340.6    | 1486.52-3405.31     | Region       |
| <b>Israel</b>                           | 127.79 | 81.16-185.92  | 3641.25   | 2312.57-5297.6      | Region       |
| <b>Italy</b>                            | 120.86 | 107.49-135.44 | 31195.96  | 27700.85-34902.62   | Country      |
| <b>Luxembourg</b>                       | 127.79 | 81.16-185.92  | 313.1     | 198.85-455.52       | Region       |
| <b>Malta</b>                            | 85.85  | 70.14-102.73  | 154.02    | 116.98-193.02       | Country      |
| <b>Netherlands</b>                      | 242.82 | 187.89-307.02 | 16492.63  | 12786.9-20928.12    | Country      |
| <b>Norway</b>                           | 198.92 | 177.74-221.64 | 4115.76   | 3659.95-4584.08     | Country      |
| <b>Portugal</b>                         | 127.79 | 81.16-185.92  | 5707.8    | 3625.05-8304.2      | Region       |
| <b>Spain</b>                            | 156.68 | 141.61-173.14 | 30429.2   | 27439.78-33556.45   | Country      |
| <b>Sweden</b>                           | 310.84 | 302.36-319.04 | 12153     | 11746-12553.1       | Country      |
| <b>Switzerland</b>                      | 127.79 | 81.16-185.92  | 4498.56   | 2857.06-6544.9      | Region       |
| <b>United Kingdom</b>                   | 228.05 | 223.5-232.79  | 60812.47  | 59396.55-62229.02   | Country      |
| <b>Latin America, southern</b>          | 39.17  | 7.07-111.55   | 9632.47   | 1731.73-27375.42    | REGION       |
| <b>Argentina</b>                        | 12.04  | 10.06-14.44   | 1927.02   | 1583-2334           | Country      |
| <b>Chile</b>                            | 39.17  | 7.07-111.55   | 2847.47   | 513.96-8109.16      | Region       |
| <b>Uruguay</b>                          | 39.17  | 7.07-111.55   | 520.13    | 93.88-1481.25       | Region       |
| <b>North America, high income</b>       | 89.57  | 35.17-184.69  | 127303.38 | 49731.15-261979.7   | REGION       |
| <b>Canada</b>                           | 61.37  | 59.99-62.89   | 9284.62   | 9012.82-9576.05     | Country      |
| <b>United States of America</b>         | 120.22 | 118.52-121.81 | 152682.85 | 150356.98-154925.52 | Country      |
| <b>Latin America and Caribbean</b>      | 172.31 | 61.81-418.39  | 351806.25 | 126878.32-854478.2  | SUPER-REGION |
| <b>Caribbean</b>                        | 220.33 | 57.31-595.35  | 45254.87  | 17851.05-96220.72   | REGION       |
| <b>Antigua and Barbuda</b>              | 220.33 | 57.31-595.35  | 80.67     | 20.98-217.98        | Region       |
| <b>Bahamas</b>                          | 220.33 | 57.31-595.35  | 317.46    | 82.57-857.8         | Region       |
| <b>Barbados</b>                         | 351.48 | 76.26-841.65  | 501       | 453-552             | Country      |
| <b>Belize</b>                           | 220.33 | 57.31-595.35  | 270.7     | 70.41-731.45        | Region       |
| <b>Cuba</b>                             | 324.03 | 56.34-916.9   | 18569.11  | 7181.6-37845.32     | Country      |
| <b>Dominican Republic</b>               | 220.33 | 57.31-595.35  | 7711.27   | 2005.78-20836.49    | Region       |
| <b>Grenada</b>                          | 220.33 | 57.31-595.35  | 86.21     | 22.42-232.95        | Region       |
| <b>Guyana</b>                           | 220.33 | 57.31-595.35  | 545.11    | 141.79-1472.94      | Region       |
| <b>Haiti</b>                            | 220.33 | 57.31-595.35  | 7463.95   | 1941.45-20168.23    | Region       |
| <b>Jamaica</b>                          | 220.33 | 57.31-595.35  | 2280.07   | 593.07-6160.94      | Region       |
| <b>Puerto Rico</b>                      | 232.92 | 50.17-561.88  | 3451.76   | 3194-3699.07        | Country      |
| <b>Saint Lucia</b>                      | 220.33 | 57.31-595.35  | 155.04    | 40.33-418.94        | Region       |
| <b>Saint Vincent and the Grenadines</b> | 220.33 | 57.31-595.35  | 84.35     | 21.94-227.92        | Region       |
| <b>Suriname</b>                         | 220.33 | 57.31-595.35  | 423.11    | 110.06-1143.28      | Region       |
| <b>Trinidad and Tobago</b>              | 220.33 | 57.31-595.35  | 1159.07   | 301.49-3131.9       | Region       |
| <b>Virgin Island (US)</b>               | 220.33 | 57.31-595.35  | 91.8      | 23.88-248.04        | Region       |
| <b>Latin America, Andean</b>            | 188.87 | 40.66-501.57  | 38718.93  | 8349.35-102718.55   | REGION       |
| <b>Bolivia</b>                          | 188.87 | 40.66-501.57  | 6671.56   | 1436.26-17717.24    | Region       |
| <b>Ecuador</b>                          | 174.55 | 53.53-385.25  | 9930.88   | 3013.8-22118.72     | Country      |
| <b>Peru</b>                             | 188.87 | 40.66-501.57  | 21302.19  | 4585.94-56570.87    | Region       |
| <b>Latin America, central</b>           | 138.87 | 58.57-266.59  | 121740.7  | 51365.1-233431.6    | REGION       |

|                                         |        |               |           |                      |              |
|-----------------------------------------|--------|---------------|-----------|----------------------|--------------|
| Colombia                                | 38.85  | 38.22-39.52   | 7113.24   | 6906.95-7315.05      | Country      |
| Costa Rica                              | 138.87 | 58.57-266.59  | 2572.95   | 1085.17-4939.32      | Region       |
| El Salvador                             | 138.87 | 58.57-266.59  | 3214.31   | 1355.67-6170.55      | Region       |
| Guatemala                               | 138.87 | 58.57-266.59  | 7238.3    | 3052.84-13895.44     | Region       |
| Honduras                                | 138.87 | 58.57-266.59  | 4115.12   | 1735.6-7899.84       | Region       |
| Mexico                                  | 276.75 | 162.01-417.34 | 121935.01 | 71042.68-183779.7    | Country      |
| Nicaragua                               | 138.87 | 58.57-266.59  | 2939.66   | 1239.84-5643.3       | Region       |
| Panama                                  | 138.87 | 58.57-266.59  | 1971.47   | 831.49-3784.66       | Region       |
| Venezuela (Bolivarian Republic of)      | 180.46 | 56.43-401.11  | 17015.1   | 5277.48-37745.9      | Country      |
| Latin America, tropical                 | 256.01 | 61.72-724.22  | 206841.74 | 49795.82-585861.27   | REGION       |
| Brazil                                  | 339.25 | 80.2-806.78   | 266719.5  | 63065.67-633126.75   | Country      |
| Paraguay                                | 256.01 | 61.72-724.22  | 5576.45   | 1344.39-15775.08     | Region       |
| North Africa and Middle East            | 159.44 | 40.68-406.83  | 293869.39 | 75075.27-749573.3    | SUPER-REGION |
| North Africa and the Middle East        | 184.99 | 83.07-337.3   | 340963.69 | 153218.98-623129.02  | REGION       |
| Afghanistan                             | 184.99 | 83.07-337.3   | 16192.91  | 7271.45-29525.21     | Region       |
| Algeria                                 | 184.99 | 83.07-337.3   | 25273.37  | 11349.04-46081.99    | Region       |
| Bahrain                                 | 184.99 | 83.07-337.3   | 756.41    | 339.67-1379.2        | Region       |
| Egypt                                   | 184.99 | 83.07-337.3   | 54686.62  | 24557.1-99712.4      | Region       |
| Iran (Islamic Republic of)              | 177.46 | 113.8-253.39  | 51050.2   | 32728.07-73084.43    | Country      |
| Iraq                                    | 184.99 | 83.07-337.3   | 19366.51  | 8696.56-35311.77     | Region       |
| Jordan                                  | 184.99 | 83.07-337.3   | 5322.95   | 2390.28-9705.56      | Region       |
| Kuwait                                  | 184.99 | 83.07-337.3   | 2091.54   | 939.21-3813.59       | Region       |
| Lebanon                                 | 184.99 | 83.07-337.3   | 4223.75   | 1896.68-7701.34      | Region       |
| Libya                                   | 184.99 | 83.07-337.3   | 4068.26   | 1826.86-7417.83      | Region       |
| Morocco                                 | 184.99 | 83.07-337.3   | 22813.67  | 10244.51-41597.11    | Region       |
| Palestine                               | 184.99 | 83.07-337.3   | 2411.62   | 1082.94-4397.21      | Region       |
| Oman                                    | 184.99 | 83.07-337.3   | 1954.34   | 877.6-3563.43        | Region       |
| Qatar                                   | 184.99 | 83.07-337.3   | 882.23    | 396.17-1608.61       | Region       |
| Saudi Arabia                            | 139.62 | 44.47-308.9   | 13067.3   | 4175.05-28938.5      | Country      |
| Sudan                                   | 184.99 | 83.07-337.3   | 20284     | 9108.56-36984.67     | Region       |
| Syrian Arab Republic                    | 184.99 | 83.07-337.3   | 9859.45   | 4427.4-17977.15      | Region       |
| Sudan                                   | 184.99 | 83.07-337.3   | 20284     | 9108.56-36984.67     | Region       |
| Tunisia                                 | 184.99 | 83.07-337.3   | 7746.63   | 3478.63-14124.75     | Region       |
| Turkey                                  | 120.98 | 112.17-130.87 | 35690.5   | 33076.7-38590.58     | Country      |
| United Arab Emirates                    | 548.69 | 456.86-652.45 | 11784.82  | 9811.42-14030.15     | Country      |
| Yemen                                   | 184.99 | 83.07-337.3   | 13968.94  | 6272.77-25470.15     | Region       |
| South Asia                              | 68.4   | 11.19-190.7   | 379036.99 | 61806.05-1055916.85  | SUPER-REGION |
| Asia, south                             | 42.16  | 8.72-121.59   | 233631.66 | 48581.08-673754.47   | REGION       |
| Bangladesh                              | 42.16  | 8.72-121.59   | 22032.52  | 4557.01-63542.09     | Region       |
| Bhutan                                  | 42.16  | 8.72-121.59   | 98.16     | 20.3-283.09          | Region       |
| India                                   | 19.61  | 9.33-34.35    | 84677.13  | 40208.05-148227.35   | Country      |
| Nepal                                   | 42.16  | 8.72-121.59   | 4239.48   | 876.86-12226.73      | Region       |
| Pakistan                                | 42.16  | 8.72-121.59   | 25154.2   | 5202.67-72545.03     | Region       |
| South East Asia, east Asia, and Oceania | 123.59 | 29.27-402.5   | 992025.72 | 235763.83-3232110.45 | SUPER-REGION |
| Asia, east                              | 126.84 | 31.86-371.97  | 719721.42 | 180585.3-2111839.62  | REGION       |
| China                                   | 107.03 | 106.17-108    | 596908.03 | 591610.1-602497.35   | Country      |
| Dem. People's Republic of Korea         | 126.84 | 31.86-371.97  | 12369.7   | 3107.05-36275.28     | Region       |
| Asia, South East                        | 123.59 | 29.27-402.5   | 992025.72 | 235763.83-3232110.45 | REGION       |
| Cambodia                                | 123.59 | 29.27-402.5   | 6548.04   | 1550.78-21325.25     | Super-region |
| Indonesia                               | 123.59 | 29.27-402.5   | 111066.7  | 26304.09-361714.92   | Super-region |
| Lao People's Democratic Republic        | 123.59 | 29.27-402.5   | 2636.54   | 624.42-8586.52       | Super-region |
| Malaysia                                | 123.59 | 29.27-402.5   | 13296.68  | 3149.07-43303.78     | Super-region |
| Maldives                                | 123.59 | 29.27-402.5   | 165.04    | 39.09-537.49         | Super-region |
| Mauritius                               | 123.59 | 29.27-402.5   | 609.42    | 144.33-1984.73       | Super-region |

|                                  |        |             |            |                      |              |
|----------------------------------|--------|-------------|------------|----------------------|--------------|
| Myanmar                          | 123.59 | 29.27-402.5 | 23201.66   | 5494.88-75561.68     | Super-region |
| Philippines                      | 123.59 | 29.27-402.5 | 41340      | 9790.61-134633.46    | Super-region |
| Seychelles                       | 123.59 | 29.27-402.5 | 41.25      | 9.77-134.34          | Super-region |
| Sri Lanka                        | 123.59 | 29.27-402.5 | 9646.22    | 2284.53-31415.19     | Super-region |
| Thailand                         | 123.59 | 29.27-402.5 | 34710.11   | 8220.45-113041.67    | Super-region |
| Timor-Leste                      | 123.59 | 29.27-402.5 | 418        | 99-1361.32           | Super-region |
| Vietnam                          | 123.59 | 29.27-402.5 | 43149.12   | 10219.07-140525.28   | Super-region |
| Oceania                          | 123.59 | 29.27-402.5 | 992025.72  | 235763.83-3232110.45 | REGION       |
| Fiji                             | 123.59 | 29.27-402.5 | 344.75     | 81.65-1122.75        | Super-region |
| Guam                             | 123.59 | 29.27-402.5 | 70.82      | 16.77-230.64         | Super-region |
| Kiribati                         | 123.59 | 29.27-402.5 | 43.1       | 10.21-140.37         | Super-region |
| Marshall Islands                 | 123.59 | 29.27-402.5 | 16.89      | 4-55.02              | Super-region |
| Micronesia (Fed. States of)      | 123.59 | 29.27-402.5 | 41.39      | 9.8-134.79           | Super-region |
| Papua New Guinea                 | 123.59 | 29.27-402.5 | 2980.88    | 705.97-9707.95       | Super-region |
| Samoa                            | 123.59 | 29.27-402.5 | 62.93      | 14.9-204.96          | Super-region |
| Solomon Islands                  | 123.59 | 29.27-402.5 | 210.83     | 49.93-686.61         | Super-region |
| Tonga                            | 123.59 | 29.27-402.5 | 36.61      | 8.67-119.24          | Super-region |
| Vanuatu                          | 123.59 | 29.27-402.5 | 99.09      | 23.47-322.72         | Super-region |
| Sub-Saharan Africa               | 108.75 | 39.5-270.58 | 2837376.36 | 1031162.53-7061172.6 | SUPER-REGION |
| Sub-Saharan Africa, central      | 108.75 | 39.5-270.58 | 2837376.36 | 1031162.53-7061172.6 | REGION       |
| Angola                           | 108.75 | 39.5-270.58 | 7867.63    | 2857.67-19575.39     | Global       |
| Central African Republic         | 108.75 | 39.5-270.58 | 1187.67    | 431.38-2955.03       | Global       |
| Congo                            | 108.75 | 39.5-270.58 | 1466.05    | 532.5-3647.66        | Global       |
| Democratic Republic of the Congo | 108.75 | 39.5-270.58 | 21544.01   | 7825.18-53603.47     | Global       |
| Equatorial Guinea                | 108.75 | 39.5-270.58 | 335.24     | 121.77-834.11        | Global       |
| Gabon                            | 108.75 | 39.5-270.58 | 637.15     | 231.43-1585.3        | Global       |
| Sub-Saharan Africa, eastern      | 108.75 | 39.5-270.58 | 2837376.36 | 1031162.53-7061172.6 | REGION       |
| Burundi                          | 108.75 | 39.5-270.58 | 2949.82    | 1071.43-7339.41      | Global       |
| Comoros                          | 108.75 | 39.5-270.58 | 239.54     | 87-595.99            | Global       |
| Djibouti                         | 108.75 | 39.5-270.58 | 316.16     | 114.83-786.62        | Global       |
| Eritrea                          | 108.75 | 39.5-270.58 | 948.09     | 344.36-2358.93       | Global       |
| Ethiopia                         | 108.75 | 39.5-270.58 | 30844.79   | 11203.4-76744.68     | Global       |
| Kenya                            | 108.75 | 39.5-270.58 | 14981.14   | 5441.42-37274.45     | Global       |
| Madagascar                       | 108.75 | 39.5-270.58 | 7481.3     | 2717.34-18614.15     | Global       |
| Malawi                           | 108.75 | 39.5-270.58 | 4924.88    | 1788.81-12253.55     | Global       |
| Mozambique                       | 108.75 | 39.5-270.58 | 8068.46    | 2930.61-20075.06     | Global       |
| Rwanda                           | 108.75 | 39.5-270.58 | 3650.58    | 1325.96-9082.98      | Global       |
| Somalia                          | 108.75 | 39.5-270.58 | 3720.14    | 1351.22-9256.06      | Global       |
| South Sudan                      | 108.75 | 39.5-270.58 | 2948.79    | 1071.05-7336.85      | Global       |
| Uganda                           | 108.75 | 39.5-270.58 | 11032.4    | 4007.17-27449.62     | Global       |
| United Republic of Tanzania      | 108.75 | 39.5-270.58 | 15039.3    | 5462.55-37419.17     | Global       |
| Zambia                           | 108.75 | 39.5-270.58 | 4581.32    | 1664.02-11398.75     | Global       |
| Sub-Saharan Africa, southern     | 108.75 | 39.5-270.58 | 2837376.36 | 1031162.53-7061172.6 | REGION       |
| Botswana                         | 108.75 | 39.5-270.58 | 775.19     | 281.56-1928.74       | Global       |
| Lesotho                          | 108.75 | 39.5-270.58 | 687.15     | 249.58-1709.68       | Global       |
| Namibia                          | 108.75 | 39.5-270.58 | 780.92     | 283.64-1942.99       | Global       |
| South Africa                     | 108.75 | 39.5-270.58 | 20887.83   | 7586.85-51970.85     | Global       |
| Eswatini                         | 108.75 | 39.5-270.58 | 337.38     | 122.54-839.42        | Global       |
| Zimbabwe                         | 108.75 | 39.5-270.58 | 4182.81    | 1519.27-10407.21     | Global       |
| Sub-Saharan Africa, western      | 108.75 | 39.5-270.58 | 2837376.36 | 1031162.53-7061172.6 | REGION       |
| Benin                            | 108.75 | 39.5-270.58 | 3181.5     | 1155.58-7915.87      | Global       |
| Burkina Faso                     | 108.75 | 39.5-270.58 | 5190.38    | 1885.24-12914.13     | Global       |

|                       |        |             |          |                    |        |
|-----------------------|--------|-------------|----------|--------------------|--------|
| Cote d'Ivoire         | 108.75 | 39.5-270.58 | 6718.72  | 2440.36-16716.8    | Global |
| Cameroon              | 108.75 | 39.5-270.58 | 6867.21  | 2494.3-17086.24    | Global |
| Cabo Verde            | 108.75 | 39.5-270.58 | 190.74   | 69.28-474.58       | Global |
| Chad                  | 108.75 | 39.5-270.58 | 3804.63  | 1381.91-9466.28    | Global |
| Gambia                | 108.75 | 39.5-270.58 | 613.07   | 222.68-1525.37     | Global |
| Ghana                 | 108.75 | 39.5-270.58 | 8854.33  | 3216.06-22030.39   | Global |
| Guinea                | 108.75 | 39.5-270.58 | 3506.42  | 1273.6-8724.29     | Global |
| Guinea-Bissau         | 108.75 | 39.5-270.58 | 534.99   | 194.32-1331.1      | Global |
| Liberia               | 108.75 | 39.5-270.58 | 1351.7   | 490.96-3363.16     | Global |
| Mali                  | 108.75 | 39.5-270.58 | 4694.41  | 1705.1-11680.13    | Global |
| Mauritania            | 108.75 | 39.5-270.58 | 1277.9   | 464.16-3179.54     | Global |
| Niger                 | 108.75 | 39.5-270.58 | 5258.8   | 1910.09-13084.38   | Global |
| Nigeria               | 108.75 | 39.5-270.58 | 51210.66 | 18600.66-127416.84 | Global |
| Sao Tome and Principe | 108.75 | 39.5-270.58 | 56.39    | 20.48-140.29       | Global |
| Senegal               | 108.75 | 39.5-270.58 | 4545.86  | 1651.14-11310.52   | Global |
| Sierra Leone          | 108.75 | 39.5-270.58 | 2124.88  | 771.8-5286.9       | Global |
| Togo                  | 108.75 | 39.5-270.58 | 2216.98  | 805.25-5516.05     | Global |

**Table S23. Estimated point prevalence of SLE diagnosed by physician/ dermatologist for the overall population.**

| Country/Region/Super-region                      | Expected Prevalence | 95% Confidence Interval of Prevalence | Expected Patient Number | 95% Confidence Interval of Patient Number | Hierarchy of Region in Estimate |
|--------------------------------------------------|---------------------|---------------------------------------|-------------------------|-------------------------------------------|---------------------------------|
| Global                                           | 15.59               | 5.68-39.39                            | 1215078.73              | 442744.17-3071448.42                      | GLOBAL                          |
| Central Europe, eastern Europe, and central Asia | 12.18               | 4.16-25.46                            | 50860.74                | 17281.25-106091.88                        | SUPER-REGION                    |
| Asia, central                                    | 7.92                | 2.38-19.65                            | 7502.98                 | 2257.95-18733.62                          | REGION                          |
| Armenia                                          | 7.92                | 2.38-19.65                            | 234.67                  | 70.52-582.23                              | Region                          |
| Azerbaijan                                       | 7.92                | 2.38-19.65                            | 803.01                  | 241.31-1992.33                            | Region                          |
| Georgia                                          | 7.92                | 2.38-19.65                            | 315.93                  | 94.94-783.85                              | Region                          |
| Kazakhstan                                       | 5.05                | 3.78-6.56                             | 946.48                  | 711.97-1226.27                            | Country                         |
| Kyrgyzstan                                       | 7.92                | 2.38-19.65                            | 516.71                  | 155.27-1281.99                            | Region                          |
| Mongolia                                         | 7.92                | 2.38-19.65                            | 259.64                  | 78.02-644.18                              | Region                          |
| Tajikistan                                       | 7.92                | 2.38-19.65                            | 755.38                  | 227-1874.14                               | Region                          |
| Turkmenistan                                     | 7.92                | 2.38-19.65                            | 477.66                  | 143.54-1185.11                            | Region                          |
| Uzbekistan                                       | 7.92                | 2.38-19.65                            | 2650.72                 | 796.56-6576.6                             | Region                          |
| Europe, central                                  | 17.37               | 4.86-46.74                            | 19732.41                | 5503.48-53247.5                           | REGION                          |
| Albania                                          | 17.37               | 4.86-46.74                            | 499.87                  | 139.86-1345.06                            | Region                          |
| Bosnia and Herzegovina                           | 17.37               | 4.86-46.74                            | 569.85                  | 159.44-1533.38                            | Region                          |
| Bulgaria                                         | 17.37               | 4.86-46.74                            | 1206.91                 | 337.69-3247.62                            | Region                          |
| Croatia                                          | 17.37               | 4.86-46.74                            | 713.04                  | 199.5-1918.69                             | Region                          |
| Czechia                                          | 17.37               | 4.86-46.74                            | 1860.08                 | 520.44-5005.2                             | Region                          |
| Hungary                                          | 21.28               | 20.82-21.77                           | 2054.48                 | 1953-2158.05                              | Country                         |
| Montenegro                                       | 17.37               | 4.86-46.74                            | 109.09                  | 30.52-293.55                              | Region                          |
| Poland                                           | 17.37               | 4.86-46.74                            | 6573.08                 | 1839.1-17687.15                           | Region                          |
| Romania                                          | 17.37               | 4.86-46.74                            | 3341.38                 | 934.89-8991.15                            | Region                          |
| Serbia                                           | 17.37               | 4.86-46.74                            | 1517.66                 | 424.63-4083.8                             | Region                          |
| Slovakia                                         | 17.37               | 4.86-46.74                            | 948.31                  | 265.33-2551.76                            | Region                          |
| Slovenia                                         | 17.37               | 4.86-46.74                            | 361.08                  | 101.03-971.6                              | Region                          |
| North Macedonia                                  | 17.37               | 4.86-46.74                            | 361.88                  | 101.25-973.77                             | Region                          |
| Europe, eastern                                  | 12.21               | 3.63-35.61                            | 20290.87                | 6173.98-50299.52                          | REGION                          |
| Belarus                                          | 12.21               | 3.63-35.61                            | 1153.71                 | 343-3364.76                               | Region                          |
| Estonia                                          | 26.29               | 7.2-79.39                             | 280.45                  | 70.98-704.55                              | Country                         |
| Latvia                                           | 12.21               | 3.63-35.61                            | 230.24                  | 68.45-671.48                              | Region                          |
| Lithuania                                        | 23.09               | 6.42-71.55                            | 506.08                  | 128.98-1342                               | Country                         |
| Republic of Moldova                              | 12.21               | 3.63-35.61                            | 492.54                  | 146.43-1436.47                            | Region                          |
| Russia                                           | 3.7                 | 1.03-11.5                             | 4341.61                 | 1177.73-11412.92                          | Country                         |

|                                  |       |              |           |                    |              |
|----------------------------------|-------|--------------|-----------|--------------------|--------------|
| Ukraine                          | 6.28  | 1.64-19.62   | 2221.42   | 530.85-5958.22     | Country      |
| High income                      | 11.83 | 4.86-21.13   | 128383.26 | 52426.05-229083.7  | SUPER-REGION |
| Asia Pacific, high income        | 11.19 | 4.35-21.66   | 20582.68  | 7953.3-39823.57    | REGION       |
| Brunei Darussalam                | 11.19 | 4.35-21.66   | 48.95     | 19.03-94.76        | Region       |
| Japan                            | 9.37  | 8.35-10.38   | 11842.95  | 10500-13159.12     | Country      |
| Republic of Korea                | 9.38  | 9.17-9.58    | 4806.25   | 4638.98-4979.1     | Country      |
| Singapore                        | 11.19 | 4.35-21.66   | 654.57    | 254.46-1267.02     | Country      |
| Australasia                      | 7.89  | 2.12-19.5    | 2389.96   | 613.98-5872.08     | REGION       |
| Australia                        | 3.83  | 3.02-4.76    | 975.11    | 756-1217.05        | Country      |
| New Zealand                      | 7.89  | 2.12-19.5    | 380.42    | 102.22-940.2       | Region       |
| Europe, western                  | 21.41 | 13.58-31.07  | 92928.86  | 58827.83-134992.83 | REGION       |
| Austria                          | 21.41 | 13.58-31.07  | 1928.02   | 1222.91-2797.93    | Region       |
| Belgium                          | 21.41 | 13.58-31.07  | 2480.93   | 1573.61-3600.31    | Region       |
| Cyprus                           | 21.41 | 13.58-31.07  | 258.47    | 163.95-375.1       | Region       |
| Denmark                          | 22    | 21.14-22.78  | 1272.81   | 1180.95-1354.05    | Country      |
| Finland                          | 21.41 | 13.58-31.07  | 1186.06   | 752.3-1721.2       | Region       |
| France                           | 14.37 | 14-14.73     | 9377.19   | 9065.92-9689.27    | Country      |
| Germany                          | 10.37 | 10.11-10.64  | 8688.63   | 8417.57-8963.05    | Country      |
| Greece                           | 14.11 | 13.23-15.09  | 1468.92   | 1344-1596          | Country      |
| Iceland                          | 21.41 | 13.58-31.07  | 73.05     | 46.33-106.01       | Region       |
| Ireland                          | 21.41 | 13.58-31.07  | 1057.05   | 670.47-1533.97     | Region       |
| Israel                           | 21.41 | 13.58-31.07  | 1852.88   | 1175.25-2688.89    | Region       |
| Italy                            | 21.08 | 18.72-23.64  | 12742.2   | 11261.38-14300.05  | Country      |
| Luxembourg                       | 21.41 | 13.58-31.07  | 134.01    | 85-194.47          | Region       |
| Malta                            | 14.4  | 11.68-17.24  | 63.58     | 45-84.02           | Country      |
| Netherlands                      | 39.93 | 30.9-50.41   | 6840.85   | 5277.58-8613.1     | Country      |
| Norway                           | 31.73 | 28.37-35.24  | 1719.38   | 1528.98-1922.1     | Country      |
| Portugal                         | 21.41 | 13.58-31.07  | 2182.7    | 1384.45-3167.51    | Region       |
| Spain                            | 26.73 | 24.16-29.44  | 12495.24  | 11234.62-13805.08  | Country      |
| Sweden                           | 50.17 | 49.2-51.23   | 5065.76   | 4889.9-5244        | Country      |
| Switzerland                      | 21.41 | 13.58-31.07  | 1852.59   | 1175.07-2688.46    | Region       |
| United Kingdom                   | 37.2  | 36.55-37.81  | 25248.89  | 24693.88-25799     | Country      |
| Latin America, southern          | 5.98  | 1.09-16.82   | 4050.49   | 755.68-11415.45    | REGION       |
| Argentina                        | 1.8   | 1.51-2.16    | 812.14    | 670.97-984         | Country      |
| Chile                            | 5.98  | 1.09-16.82   | 1142.93   | 208.33-3214.72     | Region       |
| Uruguay                          | 5.98  | 1.09-16.82   | 207.6     | 37.84-583.92       | Region       |
| North America, high income       | 14.38 | 5.62-29.56   | 52995.4   | 20851.13-109148.17 | REGION       |
| Canada                           | 10.17 | 9.81-10.57   | 3838.73   | 3658.93-4019.02    | Country      |
| United States of America         | 19.23 | 18.68-19.83  | 63635.6   | 61705.5-65821.18   | Country      |
| Latin America and Caribbean      | 25.54 | 9.31-61.11   | 149266.42 | 54789.27-358482.32 | SUPER-REGION |
| Caribbean                        | 32.5  | 8.49-87.97   | 19257.35  | 7582.88-41602.18   | REGION       |
| Antigua and Barbuda              | 32.5  | 8.49-87.97   | 31.83     | 8.31-86.14         | Region       |
| Bahamas                          | 32.5  | 8.49-87.97   | 127.8     | 33.39-345.93       | Region       |
| Barbados                         | 58.37 | 12.37-139.55 | 207.12    | 179.95-235         | Country      |
| Belize                           | 32.5  | 8.49-87.97   | 129.22    | 33.76-349.78       | Region       |
| Cuba                             | 53.58 | 9.33-152.22  | 7703.14   | 3005.77-15760.4    | Country      |
| Dominican Republic               | 32.5  | 8.49-87.97   | 3524.79   | 920.78-9540.79     | Region       |
| Grenada                          | 32.5  | 8.49-87.97   | 36.57     | 9.55-98.98         | Region       |
| Guyana                           | 32.5  | 8.49-87.97   | 255.59    | 66.77-691.82       | Region       |
| Haiti                            | 32.5  | 8.49-87.97   | 3705.72   | 968.05-10030.52    | Region       |
| Jamaica                          | 32.5  | 8.49-87.97   | 962.31    | 251.38-2604.75     | Region       |
| Puerto Rico                      | 39.98 | 8.56-97.24   | 1410.51   | 1288.97-1527.02    | Country      |
| Saint Lucia                      | 32.5  | 8.49-87.97   | 59.67     | 15.59-161.51       | Region       |
| Saint Vincent and the Grenadines | 32.5  | 8.49-87.97   | 36.06     | 9.42-97.6          | Region       |
| Suriname                         | 32.5  | 8.49-87.97   | 190.65    | 49.8-516.04        | Region       |
| Trinidad and Tobago              | 32.5  | 8.49-87.97   | 454.81    | 118.81-1231.05     | Region       |
| Virgin Island (US)               | 32.5  | 8.49-87.97   | 33.93     | 8.86-91.85         | Region       |

|                                                |       |             |           |                     |              |
|------------------------------------------------|-------|-------------|-----------|---------------------|--------------|
| <b>Latin America, Andean</b>                   | 26.76 | 5.7-71.01   | 16668.03  | 3518.23-44419.12    | REGION       |
| <b>Bolivia</b>                                 | 26.76 | 5.7-71.01   | 3123.3    | 665.28-8287.94      | Region       |
| <b>Ecuador</b>                                 | 24.3  | 7.5-54.03   | 4284.58   | 1321.83-9593.35     | Country      |
| <b>Peru</b>                                    | 26.76 | 5.7-71.01   | 8822.87   | 1879.31-23412.25    | Region       |
| <b>Latin America, central</b>                  | 20.08 | 8.51-38.53  | 51919.47  | 22118.75-99261.5    | REGION       |
| <b>Colombia</b>                                | 5.89  | 5.71-6.06   | 2994.29   | 2859.95-3130        | Country      |
| <b>Costa Rica</b>                              | 20.08 | 8.51-38.53  | 1022.77   | 433.46-1962.52      | Region       |
| <b>El Salvador</b>                             | 20.08 | 8.51-38.53  | 1302.38   | 551.96-2499.04      | Region       |
| <b>Guatemala</b>                               | 20.08 | 8.51-38.53  | 3597.35   | 1524.58-6902.69     | Region       |
| <b>Honduras</b>                                | 20.08 | 8.51-38.53  | 1988.75   | 842.84-3816.06      | Region       |
| <b>Mexico</b>                                  | 40.3  | 23.33-60.71 | 51954.49  | 30025.53-78499.67   | Country      |
| <b>Nicaragua</b>                               | 20.08 | 8.51-38.53  | 1330.13   | 563.71-2552.28      | Region       |
| <b>Panama</b>                                  | 20.08 | 8.51-38.53  | 866.18    | 367.09-1662.05      | Region       |
| <b>Venezuela (Bolivarian Republic of)</b>      | 25.66 | 8-57.17     | 7294.76   | 2241.43-16198.3     | Country      |
| <b>Latin America, tropical</b>                 | 39.58 | 9.57-112.8  | 86951.89  | 21039.25-246680.05  | REGION       |
| <b>Brazil</b>                                  | 52.73 | 12.58-125.6 | 112068.16 | 26663.4-266725.65   | Country      |
| <b>Paraguay</b>                                | 39.58 | 9.57-112.8  | 2822.93   | 682.55-8045.13      | Region       |
| <b>North Africa and Middle East</b>            | 20.98 | 5.35-52.97  | 130324.14 | 33220.98-329334.82  | SUPER-REGION |
| <b>North Africa and the Middle East</b>        | 24.19 | 10.93-44.16 | 150279.98 | 67901.62-274395.02  | REGION       |
| <b>Afghanistan</b>                             | 24.19 | 10.93-44.16 | 9416.76   | 4254.86-17190.74    | Region       |
| <b>Algeria</b>                                 | 24.19 | 10.93-44.16 | 10607.33  | 4792.81-19364.2     | Region       |
| <b>Bahrain</b>                                 | 24.19 | 10.93-44.16 | 411.61    | 185.98-751.42       | Region       |
| <b>Egypt</b>                                   | 24.19 | 10.93-44.16 | 24754.46  | 11185.04-45190.45   | Region       |
| <b>Iran (Islamic Republic of)</b>              | 25.94 | 16.6-36.99  | 21784.92  | 13921.88-31056.25   | Country      |
| <b>Iraq</b>                                    | 24.19 | 10.93-44.16 | 9729.78   | 4396.3-17762.18     | Region       |
| <b>Jordan</b>                                  | 24.19 | 10.93-44.16 | 2468.13   | 1115.2-4505.69      | Region       |
| <b>Kuwait</b>                                  | 24.19 | 10.93-44.16 | 1033.05   | 466.77-1885.88      | Region       |
| <b>Lebanon</b>                                 | 24.19 | 10.93-44.16 | 1651.04   | 746-3014.05         | Region       |
| <b>Libya</b>                                   | 24.19 | 10.93-44.16 | 1662.16   | 751.03-3034.35      | Region       |
| <b>Morocco</b>                                 | 24.19 | 10.93-44.16 | 8928.65   | 4034.32-16299.68    | Region       |
| <b>Palestine</b>                               | 24.19 | 10.93-44.16 | 1234.03   | 557.58-2252.78      | Region       |
| <b>Oman</b>                                    | 24.19 | 10.93-44.16 | 1235.24   | 558.13-2254.99      | Region       |
| <b>Qatar</b>                                   | 24.19 | 10.93-44.16 | 696.91    | 314.89-1272.24      | Region       |
| <b>Saudi Arabia</b>                            | 17.18 | 5.42-38.46  | 5980.84   | 1898.58-13359.2     | Country      |
| <b>Sudan</b>                                   | 24.19 | 10.93-44.16 | 10607.07  | 4792.69-19363.71    | Region       |
| <b>Syrian Arab Republic</b>                    | 24.19 | 10.93-44.16 | 4233.37   | 1912.8-7728.22      | Region       |
| <b>Sudan</b>                                   | 24.19 | 10.93-44.16 | 10607.07  | 4792.69-19363.71    | Region       |
| <b>Tunisia</b>                                 | 24.19 | 10.93-44.16 | 2858.86   | 1291.75-5218.99     | Region       |
| <b>Turkey</b>                                  | 17.94 | 16.57-19.38 | 15130.5   | 13912-16320.1       | Country      |
| <b>United Arab Emirates</b>                    | 59.66 | 49.69-70.97 | 5899.1    | 4913.42-7053.1      | Country      |
| <b>Yemen</b>                                   | 24.19 | 10.93-44.16 | 7214.88   | 3259.97-13171.11    | Region       |
| <b>South Asia</b>                              | 9.2   | 1.49-25.35  | 165187.27 | 26525.38-455289.62  | SUPER-REGION |
| <b>Asia, south</b>                             | 5.67  | 1.16-16.51  | 101832.24 | 20855.7-296043.02   | REGION       |
| <b>Bangladesh</b>                              | 5.67  | 1.16-16.51  | 9337.56   | 1910.33-27189.27    | Region       |
| <b>Bhutan</b>                                  | 5.67  | 1.16-16.51  | 43.75     | 8.95-127.38         | Region       |
| <b>India</b>                                   | 2.66  | 1.28-4.68   | 36773.1   | 17737.5-64272.6     | Country      |
| <b>Nepal</b>                                   | 5.67  | 1.16-16.51  | 1652.05   | 337.99-4810.47      | Region       |
| <b>Pakistan</b>                                | 5.67  | 1.16-16.51  | 12524.55  | 2562.34-36469.19    | Region       |
| <b>South East Asia, east Asia, and Oceania</b> | 19.04 | 4.47-62.08  | 417806.66 | 97981.1-1363193.12  | SUPER-REGION |
| <b>Asia, east</b>                              | 20.1  | 4.98-59.24  | 300945.55 | 74976.57-886931.47  | REGION       |
| <b>China</b>                                   | 16.95 | 16.55-17.36 | 249430.2  | 243304.25-255376.22 | Country      |
| <b>Dem. People's Republic of Korea</b>         | 20.1  | 4.98-59.24  | 5181.49   | 1283.77-15271.21    | Region       |
| <b>Asia, South East</b>                        | 19.04 | 4.47-62.08  | 417806.66 | 97981.1-1363193.12  | REGION       |
| <b>Cambodia</b>                                | 19.04 | 4.47-62.08  | 3183.28   | 747.34-10379.11     | Super-region |
| <b>Indonesia</b>                               | 19.04 | 4.47-62.08  | 52078.6   | 12226.44-169802.49  | Super-region |

|                                         |       |            |            |                      |              |
|-----------------------------------------|-------|------------|------------|----------------------|--------------|
| <b>Lao People's Democratic Republic</b> | 19.04 | 4.47-62.08 | 1385.26    | 325.22-4516.65       | Super-region |
| <b>Malaysia</b>                         | 19.04 | 4.47-62.08 | 6162.28    | 1446.71-20092.13     | Super-region |
| <b>Maldives</b>                         | 19.04 | 4.47-62.08 | 102.92     | 24.16-335.56         | Super-region |
| <b>Mauritius</b>                        | 19.04 | 4.47-62.08 | 242.12     | 56.84-789.44         | Super-region |
| <b>Myanmar</b>                          | 19.04 | 4.47-62.08 | 10359.58   | 2432.11-33777.46     | Super-region |
| <b>Philippines</b>                      | 19.04 | 4.47-62.08 | 20863.9    | 4898.19-68026.82     | Super-region |
| <b>Seychelles</b>                       | 19.04 | 4.47-62.08 | 18.72      | 4.4-61.05            | Super-region |
| <b>Sri Lanka</b>                        | 19.04 | 4.47-62.08 | 4076.97    | 957.15-13292.99      | Super-region |
| <b>Thailand</b>                         | 19.04 | 4.47-62.08 | 13288.25   | 3119.67-43326.38     | Super-region |
| <b>Timor-Leste</b>                      | 19.04 | 4.47-62.08 | 251.03     | 58.93-818.49         | Super-region |
| <b>Vietnam</b>                          | 19.04 | 4.47-62.08 | 18528.73   | 4349.97-60412.99     | Super-region |
| <b>Oceania</b>                          | 19.04 | 4.47-62.08 | 417806.66  | 97981.1-1363193.12   | REGION       |
| <b>Fiji</b>                             | 19.04 | 4.47-62.08 | 170.68     | 40.07-556.51         | Super-region |
| <b>Guam</b>                             | 19.04 | 4.47-62.08 | 32.13      | 7.54-104.77          | Super-region |
| <b>Kiribati</b>                         | 19.04 | 4.47-62.08 | 22.74      | 5.34-74.15           | Super-region |
| <b>Marshall Islands</b>                 | 19.04 | 4.47-62.08 | 10.63      | 2.5-34.65            | Super-region |
| <b>Micronesia (Fed. States of)</b>      | 19.04 | 4.47-62.08 | 21.9       | 5.14-71.41           | Super-region |
| <b>Papua New Guinea</b>                 | 19.04 | 4.47-62.08 | 1703.51    | 399.93-5554.31       | Super-region |
| <b>Samoa</b>                            | 19.04 | 4.47-62.08 | 37.78      | 8.87-123.17          | Super-region |
| <b>Solomon Islands</b>                  | 19.04 | 4.47-62.08 | 130.78     | 30.7-426.41          | Super-region |
| <b>Tonga</b>                            | 19.04 | 4.47-62.08 | 20.12      | 4.72-65.62           | Super-region |
| <b>Vanuatu</b>                          | 19.04 | 4.47-62.08 | 58.48      | 13.73-190.68         | Super-region |
| <b>Sub-Saharan Africa</b>               | 15.59 | 5.68-39.39 | 1215078.73 | 442744.17-3071448.42 | SUPER-REGION |
| <b>Sub-Saharan Africa, central</b>      | 15.59 | 5.68-39.39 | 1215078.73 | 442744.17-3071448.42 | REGION       |
| <b>Angola</b>                           | 15.59 | 5.68-39.39 | 5123.85    | 1866.8-12946.01      | Global       |
| <b>Central African Republic</b>         | 15.59 | 5.68-39.39 | 752.96     | 274.33-1902.44       | Global       |
| <b>Congo</b>                            | 15.59 | 5.68-39.39 | 860.27     | 313.43-2173.58       | Global       |
| <b>Democratic Republic of the Congo</b> | 15.59 | 5.68-39.39 | 13962.59   | 5087.08-35278.17     | Global       |
| <b>Equatorial Guinea</b>                | 15.59 | 5.68-39.39 | 218.73     | 79.69-552.64         | Global       |
| <b>Gabon</b>                            | 15.59 | 5.68-39.39 | 346.99     | 126.42-876.71        | Global       |
| <b>Sub-Saharan Africa, eastern</b>      | 15.59 | 5.68-39.39 | 1215078.73 | 442744.17-3071448.42 | REGION       |
| <b>Burundi</b>                          | 15.59 | 5.68-39.39 | 1853.77    | 675.4-4683.77        | Global       |
| <b>Comoros</b>                          | 15.59 | 5.68-39.39 | 135.57     | 49.39-342.53         | Global       |
| <b>Djibouti</b>                         | 15.59 | 5.68-39.39 | 154.03     | 56.12-389.17         | Global       |
| <b>Eritrea</b>                          | 15.59 | 5.68-39.39 | 552.88     | 201.44-1396.93       | Global       |
| <b>Ethiopia</b>                         | 15.59 | 5.68-39.39 | 17922.75   | 6529.91-45283.98     | Global       |
| <b>Kenya</b>                            | 15.59 | 5.68-39.39 | 8382.94    | 3054.21-21180.51     | Global       |
| <b>Madagascar</b>                       | 15.59 | 5.68-39.39 | 4317.01    | 1572.84-10907.44     | Global       |
| <b>Malawi</b>                           | 15.59 | 5.68-39.39 | 2982.36    | 1086.58-7535.29      | Global       |
| <b>Mozambique</b>                       | 15.59 | 5.68-39.39 | 4872.72    | 1775.31-12311.51     | Global       |
| <b>Rwanda</b>                           | 15.59 | 5.68-39.39 | 2019.25    | 735.69-5101.87       | Global       |
| <b>Somalia</b>                          | 15.59 | 5.68-39.39 | 2477.75    | 902.73-6260.32       | Global       |
| <b>South Sudan</b>                      | 15.59 | 5.68-39.39 | 1745.1     | 635.8-4409.2         | Global       |
| <b>Uganda</b>                           | 15.59 | 5.68-39.39 | 7131.02    | 2598.09-18017.38     | Global       |
| <b>United Republic of Tanzania</b>      | 15.59 | 5.68-39.39 | 9312.56    | 3392.9-23529.3       | Global       |
| <b>Zambia</b>                           | 15.59 | 5.68-39.39 | 2866.06    | 1044.21-7241.44      | Global       |
| <b>Sub-Saharan Africa, southern</b>     | 15.59 | 5.68-39.39 | 1215078.73 | 442744.17-3071448.42 | REGION       |
| <b>Botswana</b>                         | 15.59 | 5.68-39.39 | 366.62     | 133.57-926.3         | Global       |
| <b>Lesotho</b>                          | 15.59 | 5.68-39.39 | 333.98     | 121.68-843.83        | Global       |
| <b>Namibia</b>                          | 15.59 | 5.68-39.39 | 396.13     | 144.32-1000.87       | Global       |
| <b>South Africa</b>                     | 15.59 | 5.68-39.39 | 9246.22    | 3368.73-23361.67     | Global       |
| <b>Eswatini</b>                         | 15.59 | 5.68-39.39 | 180.87     | 65.9-456.99          | Global       |
| <b>Zimbabwe</b>                         | 15.59 | 5.68-39.39 | 2317.13    | 844.21-5854.5        | Global       |

|                                    |       |            |            |                      |        |
|------------------------------------|-------|------------|------------|----------------------|--------|
| <b>Sub-Saharan Africa, western</b> | 15.59 | 5.68-39.39 | 1215078.73 | 442744.17-3071448.42 | REGION |
| <b>Benin</b>                       | 15.59 | 5.68-39.39 | 1890       | 688.6-4775.31        | Global |
| <b>Burkina Faso</b>                | 15.59 | 5.68-39.39 | 3258.82    | 1187.31-8233.8       | Global |
| <b>Cote d'Ivoire</b>               | 15.59 | 5.68-39.39 | 4112.37    | 1498.29-10390.4      | Global |
| <b>Cameroon</b>                    | 15.59 | 5.68-39.39 | 4138.5     | 1507.8-10456.41      | Global |
| <b>Cabo Verde</b>                  | 15.59 | 5.68-39.39 | 86.68      | 31.58-219            | Global |
| <b>Chad</b>                        | 15.59 | 5.68-39.39 | 2560.79    | 932.99-6470.14       | Global |
| <b>Gambia</b>                      | 15.59 | 5.68-39.39 | 376.76     | 137.27-951.92        | Global |
| <b>Ghana</b>                       | 15.59 | 5.68-39.39 | 4844.27    | 1764.94-12239.63     | Global |
| <b>Guinea</b>                      | 15.59 | 5.68-39.39 | 2047.4     | 745.94-5173.01       | Global |
| <b>Guinea-Bissau</b>               | 15.59 | 5.68-39.39 | 306.81     | 111.78-775.19        | Global |
| <b>Liberia</b>                     | 15.59 | 5.68-39.39 | 788.49     | 287.28-1992.22       | Global |
| <b>Mali</b>                        | 15.59 | 5.68-39.39 | 3157.1     | 1150.25-7976.8       | Global |
| <b>Mauritania</b>                  | 15.59 | 5.68-39.39 | 724.88     | 264.1-1831.5         | Global |
| <b>Niger</b>                       | 15.59 | 5.68-39.39 | 3773.81    | 1374.94-9534.99      | Global |
| <b>Nigeria</b>                     | 15.59 | 5.68-39.39 | 32137.16   | 11708.73-81198.37    | Global |
| <b>Sao Tome and Principe</b>       | 15.59 | 5.68-39.39 | 34.17      | 12.45-86.33          | Global |
| <b>Senegal</b>                     | 15.59 | 5.68-39.39 | 2610.38    | 951.05-6595.43       | Global |
| <b>Sierra Leone</b>                | 15.59 | 5.68-39.39 | 1243.61    | 453.09-3142.13       | Global |
| <b>Togo</b>                        | 15.59 | 5.68-39.39 | 1290.66    | 470.23-3260.99       | Global |

**Table S24. Estimated adult point prevalence of SLE diagnosed by physician/dermatologist.**

| Country/Region/Super-region                             | Expected Prevalence | 95% Confidence Interval of Prevalence | Expected Patient Number | 95% Confidence Interval of Patient Number | Hierarchy of Region in Estimate |
|---------------------------------------------------------|---------------------|---------------------------------------|-------------------------|-------------------------------------------|---------------------------------|
| <b>Global</b>                                           | 21.79               | 7.93-54.92                            | 1132760.03              | 412570.25-2856397.2                       | GLOBAL                          |
| <b>Central Europe, eastern Europe, and central Asia</b> | 15.52               | 5.3-32.42                             | 48617.63                | 16528.05-101223.68                        | SUPER-REGION                    |
| <b>Asia, central</b>                                    | 11.47               | 3.44-28.45                            | 6945.97                 | 2108.82-17342.85                          | REGION                          |
| <b>Armenia</b>                                          | 11.47               | 3.44-28.45                            | 249.5                   | 74.83-618.85                              | Region                          |
| <b>Azerbaijan</b>                                       | 11.47               | 3.44-28.45                            | 816.39                  | 244.84-2024.95                            | Region                          |
| <b>Georgia</b>                                          | 11.47               | 3.44-28.45                            | 340.07                  | 101.99-843.49                             | Region                          |
| <b>Kazakhstan</b>                                       | 7.23                | 5.41-9.39                             | 880.68                  | 649.87-1142.25                            | Country                         |
| <b>Kyrgyzstan</b>                                       | 11.47               | 3.44-28.45                            | 446.64                  | 133.95-1107.84                            | Region                          |
| <b>Mongolia</b>                                         | 11.47               | 3.44-28.45                            | 234.03                  | 70.19-580.48                              | Region                          |
| <b>Tajikistan</b>                                       | 11.47               | 3.44-28.45                            | 593.19                  | 177.9-1471.33                             | Region                          |
| <b>Turkmenistan</b>                                     | 11.47               | 3.44-28.45                            | 423.18                  | 126.92-1049.65                            | Region                          |
| <b>Uzbekistan</b>                                       | 11.47               | 3.44-28.45                            | 2442.44                 | 732.52-6058.18                            | Region                          |
| <b>Europe, central</b>                                  | 21.01               | 5.87-56.57                            | 19052.6                 | 5264.73-51480.55                          | REGION                          |
| <b>Albania</b>                                          | 21.01               | 5.87-56.57                            | 458.47                  | 128.09-1234.44                            | Region                          |
| <b>Bosnia and Herzegovina</b>                           | 21.01               | 5.87-56.57                            | 554.49                  | 154.92-1492.98                            | Region                          |
| <b>Bulgaria</b>                                         | 21.01               | 5.87-56.57                            | 1179.29                 | 329.48-3175.28                            | Region                          |
| <b>Croatia</b>                                          | 21.01               | 5.87-56.57                            | 695.67                  | 194.36-1873.12                            | Region                          |
| <b>Czechia</b>                                          | 21.01               | 5.87-56.57                            | 1792.91                 | 500.92-4827.47                            | Region                          |
| <b>Hungary</b>                                          | 25.55               | 25-26.15                              | 1989.54                 | 1898.98-2083.07                           | Country                         |
| <b>Montenegro</b>                                       | 21.01               | 5.87-56.57                            | 99.92                   | 27.92-269.03                              | Region                          |
| <b>Poland</b>                                           | 21.01               | 5.87-56.57                            | 6376.03                 | 1781.4-17167.62                           | Region                          |
| <b>Romania</b>                                          | 21.01               | 5.87-56.57                            | 3205.32                 | 895.54-8630.41                            | Region                          |
| <b>Serbia</b>                                           | 21.01               | 5.87-56.57                            | 1445.85                 | 403.96-3892.98                            | Region                          |
| <b>Slovakia</b>                                         | 21.01               | 5.87-56.57                            | 913.39                  | 255.19-2459.32                            | Region                          |
| <b>Slovenia</b>                                         | 21.01               | 5.87-56.57                            | 351.33                  | 98.16-945.96                              | Region                          |
| <b>North Macedonia</b>                                  | 21.01               | 5.87-56.57                            | 340.86                  | 95.23-917.77                              | Region                          |
| <b>Europe, eastern</b>                                  | 15.15               | 4.5-44.23                             | 19527.24                | 5865.53-48523.9                           | REGION                          |
| <b>Belarus</b>                                          | 15.15               | 4.5-44.23                             | 1117.5                  | 331.93-3262.5                             | Region                          |
| <b>Estonia</b>                                          | 32.16               | 8.81-97.07                            | 270.93                  | 73-694.15                                 | Country                         |
| <b>Latvia</b>                                           | 15.15               | 4.5-44.23                             | 225.61                  | 67.01-658.65                              | Region                          |



|                                  |       |              |           |                    |              |
|----------------------------------|-------|--------------|-----------|--------------------|--------------|
| Lithuania                        | 27.9  | 7.75-86.45   | 490.04    | 127-1269.4         | Country      |
| Republic of Moldova              | 15.15 | 4.5-44.23    | 483.37    | 143.57-1411.18     | Region       |
| Russia                           | 4.62  | 1.29-14.38   | 4168.39   | 1117.58-11097.1    | Country      |
| Ukraine                          | 7.64  | 1.99-23.85   | 2146.44   | 531.95-5907.27     | Country      |
| High income                      | 14.61 | 6-26.08      | 123312.35 | 50646.72-218877.3  | SUPER-REGION |
| Asia Pacific, high income        | 13.11 | 5.09-25.39   | 19993.15  | 7882.4-38641.85    | REGION       |
| Brunei Darussalam                | 13.11 | 5.09-25.39   | 40.12     | 15.58-77.7         | Region       |
| Japan                            | 10.97 | 9.77-12.15   | 11509.51  | 10230.55-12799.17  | Country      |
| Republic of Korea                | 11.01 | 10.77-11.26  | 4664.44   | 4501.97-4848.05    | Country      |
| Singapore                        | 13.11 | 5.09-25.39   | 637.77    | 247.62-1235.16     | Region       |
| Australasia                      | 10.07 | 2.71-24.89   | 2278.39   | 581.85-5588.4      | REGION       |
| Australia                        | 4.88  | 3.85-6.07    | 930.28    | 721-1156.17        | Country      |
| New Zealand                      | 10.07 | 2.71-24.89   | 360.64    | 97.05-891.39       | Region       |
| Europe, western                  | 26.11 | 16.55-37.87  | 89519.48  | 56624.07-130211.15 | REGION       |
| Austria                          | 26.11 | 16.55-37.87  | 1894.24   | 1200.68-2747.41    | Region       |
| Belgium                          | 26.11 | 16.55-37.87  | 2342.79   | 1484.99-3397.99    | Region       |
| Cyprus                           | 26.11 | 16.55-37.87  | 243.66    | 154.45-353.41      | Region       |
| Denmark                          | 27.13 | 26.07-28.09  | 1223.62   | 1141.95-1309.03    | Country      |
| Finland                          | 26.11 | 16.55-37.87  | 1139.55   | 722.31-1652.8      | Region       |
| France                           | 18.03 | 17.55-18.49  | 8985.73   | 8683.97-9290.05    | Country      |
| Germany                          | 12.38 | 12.06-12.7   | 8410.75   | 8133.8-8695        | Country      |
| Greece                           | 16.8  | 15.75-17.96  | 1423.96   | 1311.92-1539.03    | Country      |
| Iceland                          | 26.11 | 16.55-37.87  | 66.17     | 41.94-95.97        | Region       |
| Ireland                          | 26.11 | 16.55-37.87  | 939.04    | 595.22-1361.98     | Region       |
| Israel                           | 26.11 | 16.55-37.87  | 1456.45   | 923.18-2112.44     | Region       |
| Italy                            | 24.87 | 22.08-27.88  | 12365.38  | 10964.75-13926.75  | Country      |
| Luxembourg                       | 26.11 | 16.55-37.87  | 129.01    | 81.77-187.12       | Region       |
| Malta                            | 17.19 | 13.95-20.57  | 61.6      | 43-81              | Country      |
| Netherlands                      | 48.98 | 37.89-61.87  | 6577.16   | 5099.73-8290.17    | Country      |
| Norway                           | 39.55 | 35.37-43.93  | 1647.32   | 1455-1846.05       | Country      |
| Portugal                         | 26.11 | 16.55-37.87  | 2177.18   | 1380.02-3157.79    | Region       |
| Spain                            | 32    | 28.92-35.21  | 12087.72  | 10854.9-13395.3    | Country      |
| Sweden                           | 62.43 | 61.21-63.76  | 4855.14   | 4695.95-5038.03    | Country      |
| Switzerland                      | 26.11 | 16.55-37.87  | 1810.24   | 1147.43-2625.57    | Region       |
| United Kingdom                   | 46.37 | 45.54-47.15  | 24201.82  | 23679.95-24698.15  | Country      |
| Latin America, southern          | 8.06  | 1.47-22.69   | 3814.16   | 702.92-10720.23    | REGION       |
| Argentina                        | 2.49  | 2.08-2.99    | 760.69    | 619.98-935.02      | Country      |
| Chile                            | 8.06  | 1.47-22.69   | 1143.76   | 208.6-3219.83      | Region       |
| Uruguay                          | 8.06  | 1.47-22.69   | 203.08    | 37.04-571.69       | Region       |
| North America, high income       | 18.17 | 7.12-37.36   | 50630.37  | 19785.75-104267.87 | REGION       |
| Canada                           | 12.4  | 11.97-12.89  | 3695.02   | 3520.98-3879       | Country      |
| United States of America         | 24.41 | 23.7-25.17   | 60738.82  | 58974.07-62734.08  | Country      |
| Latin America and Caribbean      | 35.32 | 12.86-84.33  | 139683.14 | 51154.58-334006.82 | SUPER-REGION |
| Caribbean                        | 44.92 | 11.71-121.61 | 18015.02  | 7135.12-38888.72   | REGION       |
| Antigua and Barbuda              | 44.92 | 11.71-121.61 | 31.21     | 8.14-84.49         | Region       |
| Bahamas                          | 44.92 | 11.71-121.61 | 123.89    | 32.3-335.39        | Region       |
| Barbados                         | 73.01 | 15.46-174.63 | 198.89    | 172-228            | Country      |
| Belize                           | 44.92 | 11.71-121.61 | 108.55    | 28.3-293.87        | Region       |
| Cuba                             | 65.73 | 11.45-186.86 | 7411.24   | 2896.3-15108.7     | Country      |
| Dominican Republic               | 44.92 | 11.71-121.61 | 3104.1    | 809.19-8403.59     | Region       |
| Grenada                          | 44.92 | 11.71-121.61 | 35.15     | 9.16-95.16         | Region       |
| Guyana                           | 44.92 | 11.71-121.61 | 221.66    | 57.78-600.08       | Region       |
| Haiti                            | 44.92 | 11.71-121.61 | 2944.46   | 767.58-7971.41     | Region       |
| Jamaica                          | 44.92 | 11.71-121.61 | 911.68    | 237.66-2468.15     | Region       |
| Puerto Rico                      | 49.47 | 10.6-120.26  | 1358.82   | 1241.98-1476       | Country      |
| Saint Lucia                      | 44.92 | 11.71-121.61 | 61.74     | 16.1-167.15        | Region       |
| Saint Vincent and the Grenadines | 44.92 | 11.71-121.61 | 34.84     | 9.08-94.33         | Region       |
| Suriname                         | 44.92 | 11.71-121.61 | 170.49    | 44.45-461.57       | Region       |

|                                         |       |              |           |                    |              |
|-----------------------------------------|-------|--------------|-----------|--------------------|--------------|
| Trinidad and Tobago                     | 44.92 | 11.71-121.61 | 462.29    | 120.51-1251.54     | Region       |
| Virgin Island (US)                      | 44.92 | 11.71-121.61 | 34.82     | 9.08-94.28         | Region       |
| Latin America, Andean                   | 38.02 | 8.09-100.76  | 15453.41  | 3270.8-40800.03    | REGION       |
| Bolivia                                 | 38.02 | 8.09-100.76  | 2664.91   | 567.05-7062.5      | Region       |
| Ecuador                                 | 35.2  | 10.85-78.31  | 3958.54   | 1215.85-8907.17    | Country      |
| Peru                                    | 38.02 | 8.09-100.76  | 8512.81   | 1811.38-22560.52   | Region       |
| Latin America, central                  | 28.63 | 12.11-54.93  | 48241.06  | 20349.77-91951.2   | REGION       |
| Colombia                                | 7.97  | 7.72-8.21    | 2818.49   | 2689.9-2943        | Country      |
| Costa Rica                              | 28.63 | 12.11-54.93  | 1050.45   | 444.32-2015.41     | Region       |
| El Salvador                             | 28.63 | 12.11-54.93  | 1194.82   | 505.39-2292.4      | Region       |
| Guatemala                               | 28.63 | 12.11-54.93  | 2861.86   | 1210.52-5490.82    | Region       |
| Honduras                                | 28.63 | 12.11-54.93  | 1670.13   | 706.44-3204.33     | Region       |
| Mexico                                  | 57.26 | 33.15-86.41  | 48330.44  | 27864.9-72535.9    | Country      |
| Nicaragua                               | 28.63 | 12.11-54.93  | 1164.33   | 492.49-2233.91     | Region       |
| Panama                                  | 28.63 | 12.11-54.93  | 805.44    | 340.69-1545.33     | Region       |
| Venezuela (Bolivarian Republic of)      | 37.13 | 11.57-82.73  | 6752      | 2080.25-14966.95   | Country      |
| Latin America, tropical                 | 52.45 | 12.69-149.52 | 82197.42  | 20085.17-234046.47 | REGION       |
| Brazil                                  | 69.63 | 16.63-165.4  | 106042.32 | 25318.05-251993.88 | Country      |
| Paraguay                                | 52.45 | 12.69-149.52 | 2314.1    | 559.89-6596.85     | Region       |
| North Africa and Middle East            | 31.32 | 8.02-79.06   | 118927.3  | 30256.75-299689.6  | SUPER-REGION |
| North Africa and the Middle East        | 36.13 | 16.31-65.93  | 137164.39 | 62339.45-250853.47 | REGION       |
| Afghanistan                             | 36.13 | 16.31-65.93  | 6509.91   | 2938.74-11879.27   | Region       |
| Algeria                                 | 36.13 | 16.31-65.93  | 9914.38   | 4475.6-18091.75    | Region       |
| Bahrain                                 | 36.13 | 16.31-65.93  | 470.26    | 212.29-858.14      | Region       |
| Egypt                                   | 36.13 | 16.31-65.93  | 21287.6   | 9609.76-38845.6    | Region       |
| Iran (Islamic Republic of)              | 35.39 | 22.6-50.44   | 20417.39  | 12972.43-29389.9   | Country      |
| Iraq                                    | 36.13 | 16.31-65.93  | 7551.66   | 3409.01-13780.26   | Region       |
| Jordan                                  | 36.13 | 16.31-65.93  | 2099.4    | 947.72-3830.99     | Region       |
| Kuwait                                  | 36.13 | 16.31-65.93  | 1130.51   | 510.34-2062.96     | Region       |
| Lebanon                                 | 36.13 | 16.31-65.93  | 1639.63   | 740.17-2991.99     | Region       |
| Libya                                   | 36.13 | 16.31-65.93  | 1589.75   | 717.65-2900.98     | Region       |
| Morocco                                 | 36.13 | 16.31-65.93  | 8693.13   | 3924.3-15863.21    | Region       |
| Palestine                               | 36.13 | 16.31-65.93  | 949.27    | 428.53-1732.23     | Region       |
| Oman                                    | 36.13 | 16.31-65.93  | 1352.54   | 610.57-2468.11     | Region       |
| Qatar                                   | 36.13 | 16.31-65.93  | 860.63    | 388.51-1570.48     | Region       |
| Saudi Arabia                            | 23.07 | 7.28-51.67   | 5535.09   | 1711.78-12293.45   | Country      |
| Sudan                                   | 36.13 | 16.31-65.93  | 7802.82   | 3522.39-14238.59   | Region       |
| Syrian Arab Republic                    | 36.13 | 16.31-65.93  | 3807.91   | 1718.99-6948.67    | Region       |
| Sudan                                   | 36.13 | 16.31-65.93  | 7802.82   | 3522.39-14238.59   | Region       |
| Tunisia                                 | 36.13 | 16.31-65.93  | 2948.45   | 1331.01-5380.33    | Region       |
| Turkey                                  | 24.72 | 22.82-26.72  | 14173.17  | 13026.67-15318.5   | Country      |
| United Arab Emirates                    | 69.7  | 58.08-82.91  | 5601.37   | 4653.82-6717.12    | Country      |
| Yemen                                   | 36.13 | 16.31-65.93  | 5434.75   | 2453.38-9917.33    | Region       |
| South Asia                              | 13.38 | 2.16-36.81   | 152227.8  | 24515-418471.07    | SUPER-REGION |
| Asia, south                             | 8.25  | 1.69-24.03   | 93847.92  | 19272.35-274126.2  | REGION       |
| Bangladesh                              | 8.25  | 1.69-24.03   | 8665.52   | 1775.12-25240.3    | Region       |
| Bhutan                                  | 8.25  | 1.69-24.03   | 42.05     | 8.61-122.49        | Region       |
| India                                   | 3.81  | 1.83-6.69    | 34042.78  | 16467.6-59924.2    | Country      |
| Nepal                                   | 8.25  | 1.69-24.03   | 1448.17   | 296.66-4218.13     | Region       |
| Pakistan                                | 8.25  | 1.69-24.03   | 10065.15  | 2061.83-29317.04   | Region       |
| South East Asia, east Asia, and Oceania | 24.66 | 5.79-80.33   | 397057.52 | 93373.43-1293461   | SUPER-REGION |
| Asia, east                              | 25.14 | 6.23-74.1    | 288383.62 | 71685.93-849708.67 | REGION       |
| China                                   | 21.19 | 20.68-21.68  | 239048.4  | 233543.82-244831.8 | Country      |
| Dem. People's Republic of Korea         | 25.14 | 6.23-74.1    | 4723.04   | 1170.43-13921.13   | Region       |
| Asia, South East                        | 24.66 | 5.79-80.33   | 397057.52 | 93373.43-1293461   | REGION       |
| Cambodia                                | 24.66 | 5.79-80.33   | 2487.77   | 584.11-8103.91     | Super-region |

|                                  |       |            |            |                     |              |
|----------------------------------|-------|------------|------------|---------------------|--------------|
| Indonesia                        | 24.66 | 5.79-80.33 | 44206.16   | 10379.3-144001.65   | Super-region |
| Lao People's Democratic Republic | 24.66 | 5.79-80.33 | 1046.21    | 245.64-3408.03      | Super-region |
| Malaysia                         | 24.66 | 5.79-80.33 | 5451.33    | 1279.93-17757.71    | Super-region |
| Maldives                         | 24.66 | 5.79-80.33 | 100.68     | 23.64-327.96        | Super-region |
| Mauritius                        | 24.66 | 5.79-80.33 | 237.62     | 55.79-774.06        | Super-region |
| Myanmar                          | 24.66 | 5.79-80.33 | 8747.31    | 2053.81-28494.39    | Super-region |
| Philippines                      | 24.66 | 5.79-80.33 | 16323.76   | 3832.71-53174.68    | Super-region |
| Seychelles                       | 24.66 | 5.79-80.33 | 16.9       | 3.97-55.05          | Super-region |
| Sri Lanka                        | 24.66 | 5.79-80.33 | 3619.21    | 849.76-11789.57     | Super-region |
| Thailand                         | 24.66 | 5.79-80.33 | 13281.65   | 3118.44-43264.99    | Super-region |
| Timor-Leste                      | 24.66 | 5.79-80.33 | 167.65     | 39.36-546.12        | Super-region |
| Vietnam                          | 24.66 | 5.79-80.33 | 16827.27   | 3950.93-54814.88    | Super-region |
| Oceania                          | 24.66 | 5.79-80.33 | 397057.52  | 93373.43-1293461    | REGION       |
| Fiji                             | 24.66 | 5.79-80.33 | 138.38     | 32.49-450.79        | Super-region |
| Guam                             | 24.66 | 5.79-80.33 | 28.27      | 6.64-92.08          | Super-region |
| Kiribati                         | 24.66 | 5.79-80.33 | 16.36      | 3.84-53.3           | Super-region |
| Marshall Islands                 | 24.66 | 5.79-80.33 | 6.82       | 1.6-22.21           | Super-region |
| Micronesia (Fed. States of)      | 24.66 | 5.79-80.33 | 16.69      | 3.92-54.36          | Super-region |
| Papua New Guinea                 | 24.66 | 5.79-80.33 | 1203.11    | 282.48-3919.13      | Super-region |
| Samoa                            | 24.66 | 5.79-80.33 | 25.96      | 6.1-84.58           | Super-region |
| Solomon Islands                  | 24.66 | 5.79-80.33 | 84.31      | 19.79-274.63        | Super-region |
| Tonga                            | 24.66 | 5.79-80.33 | 14.19      | 3.33-46.22          | Super-region |
| Vanuatu                          | 24.66 | 5.79-80.33 | 39.29      | 9.23-128            | Super-region |
| Sub-Saharan Africa               | 21.79 | 7.93-54.92 | 1132760.03 | 412570.25-2856397.2 | SUPER-REGION |
| Sub-Saharan Africa, central      | 21.79 | 7.93-54.92 | 1132760.03 | 412570.25-2856397.2 | REGION       |
| Angola                           | 21.79 | 7.93-54.92 | 3069.18    | 1116.96-7735.64     | Global       |
| Central African Republic         | 21.79 | 7.93-54.92 | 464.03     | 168.87-1169.55      | Global       |
| Congo                            | 21.79 | 7.93-54.92 | 581.31     | 211.56-1465.15      | Global       |
| Democratic Republic of the Congo | 21.79 | 7.93-54.92 | 8514.2     | 3098.56-21459.39    | Global       |
| Equatorial Guinea                | 21.79 | 7.93-54.92 | 166.92     | 60.75-420.7         | Global       |
| Gabon                            | 21.79 | 7.93-54.92 | 262.12     | 95.39-660.66        | Global       |
| Sub-Saharan Africa, eastern      | 21.79 | 7.93-54.92 | 1132760.03 | 412570.25-2856397.2 | REGION       |
| Burundi                          | 21.79 | 7.93-54.92 | 1153.35    | 419.74-2906.93      | Global       |
| Comoros                          | 21.79 | 7.93-54.92 | 96.03      | 34.95-242.03        | Global       |
| Djibouti                         | 21.79 | 7.93-54.92 | 133.26     | 48.5-335.87         | Global       |
| Eritrea                          | 21.79 | 7.93-54.92 | 373.48     | 135.92-941.33       | Global       |
| Ethiopia                         | 21.79 | 7.93-54.92 | 12223.45   | 4448.46-30808.25    | Global       |
| Kenya                            | 21.79 | 7.93-54.92 | 5885.59    | 2141.93-14834.17    | Global       |
| Madagascar                       | 21.79 | 7.93-54.92 | 2960.18    | 1077.29-7460.9      | Global       |
| Malawi                           | 21.79 | 7.93-54.92 | 1902.13    | 692.24-4794.17      | Global       |
| Mozambique                       | 21.79 | 7.93-54.92 | 3038       | 1105.62-7657.05     | Global       |
| Rwanda                           | 21.79 | 7.93-54.92 | 1413.17    | 514.29-3561.77      | Global       |
| Somalia                          | 21.79 | 7.93-54.92 | 1468.7     | 534.5-3701.73       | Global       |
| South Sudan                      | 21.79 | 7.93-54.92 | 1169.28    | 425.53-2947.07      | Global       |
| Uganda                           | 21.79 | 7.93-54.92 | 4235.02    | 1541.24-10674.04    | Global       |
| United Republic of Tanzania      | 21.79 | 7.93-54.92 | 5944.93    | 2163.53-14983.74    | Global       |
| Zambia                           | 21.79 | 7.93-54.92 | 1780.29    | 647.9-4487.09       | Global       |
| Sub-Saharan Africa, southern     | 21.79 | 7.93-54.92 | 1132760.03 | 412570.25-2856397.2 | REGION       |
| Botswana                         | 21.79 | 7.93-54.92 | 292.11     | 106.31-736.25       | Global       |
| Lesotho                          | 21.79 | 7.93-54.92 | 269.04     | 97.91-678.08        | Global       |
| Namibia                          | 21.79 | 7.93-54.92 | 296.33     | 107.84-746.89       | Global       |
| South Africa                     | 21.79 | 7.93-54.92 | 8130.69    | 2958.99-20492.77    | Global       |
| Eswatini                         | 21.79 | 7.93-54.92 | 129.98     | 47.3-327.61         | Global       |
| Zimbabwe                         | 21.79 | 7.93-54.92 | 1524.17    | 554.69-3841.54      | Global       |
| Sub-Saharan Africa, western      | 21.79 | 7.93-54.92 | 1132760.03 | 412570.25-2856397.2 | REGION       |
| Benin                            | 21.79 | 7.93-54.92 | 1252.21    | 455.71-3156.1       | Global       |
| Burkina Faso                     | 21.79 | 7.93-54.92 | 2031.16    | 739.2-5119.39       | Global       |

|                       |       |            |          |                  |        |
|-----------------------|-------|------------|----------|------------------|--------|
| Cote d'Ivoire         | 21.79 | 7.93-54.92 | 2728.79  | 993.08-6877.7    | Global |
| Cameroon              | 21.79 | 7.93-54.92 | 2728.84  | 993.1-6877.84    | Global |
| Cabo Verde            | 21.79 | 7.93-54.92 | 76.48    | 27.83-192.75     | Global |
| Chad                  | 21.79 | 7.93-54.92 | 1511.04  | 549.91-3808.46   | Global |
| Gambia                | 21.79 | 7.93-54.92 | 239.14   | 87.03-602.75     | Global |
| Ghana                 | 21.79 | 7.93-54.92 | 3573.2   | 1300.39-9005.97  | Global |
| Guinea                | 21.79 | 7.93-54.92 | 1300.36  | 473.24-3277.47   | Global |
| Guinea-Bissau         | 21.79 | 7.93-54.92 | 203.87   | 74.19-513.84     | Global |
| Liberia               | 21.79 | 7.93-54.92 | 536.87   | 195.38-1353.14   | Global |
| Mali                  | 21.79 | 7.93-54.92 | 1848.02  | 672.55-4657.79   | Global |
| Mauritania            | 21.79 | 7.93-54.92 | 508.64   | 185.11-1281.98   | Global |
| Niger                 | 21.79 | 7.93-54.92 | 2080.4   | 757.12-5243.48   | Global |
| Nigeria               | 21.79 | 7.93-54.92 | 20609.84 | 7500.51-51945.49 | Global |
| Sao Tome and Principe | 21.79 | 7.93-54.92 | 22.37    | 8.14-56.37       | Global |
| Senegal               | 21.79 | 7.93-54.92 | 1710     | 622.32-4309.92   | Global |
| Sierra Leone          | 21.79 | 7.93-54.92 | 846.3    | 307.99-2133.03   | Global |
| Togo                  | 21.79 | 7.93-54.92 | 876.73   | 319.07-2209.74   | Global |

**Table S25. Estimated point prevalence of SLE diagnosed by physician/ dermatologist for male.**

| Country/Region/Super-region                      | Expected Prevalence | 95% Confidence Interval of Prevalence | Expected Patient Number | 95% Confidence Interval of Patient Number | Hierarchy of Region in Estimate |
|--------------------------------------------------|---------------------|---------------------------------------|-------------------------|-------------------------------------------|---------------------------------|
| Global                                           | 3.3                 | 1.2-8.29                              | 129635.38               | 47034.88-326300.3                         | GLOBAL                          |
| Central Europe, eastern Europe, and central Asia | 2.42                | 0.83-5.07                             | 4828.6                  | 1634.03-10066.37                          | SUPER-REGION                    |
| Asia, central                                    | 1.62                | 0.48-4.03                             | 759.96                  | 223.93-1917.03                            | REGION                          |
| Armenia                                          | 1.62                | 0.48-4.03                             | 22.58                   | 6.69-56.17                                | Region                          |
| Azerbaijan                                       | 1.62                | 0.48-4.03                             | 82.05                   | 24.31-204.11                              | Region                          |
| Georgia                                          | 1.62                | 0.48-4.03                             | 30.8                    | 9.13-76.62                                | Region                          |
| Kazakhstan                                       | 1.01                | 0.76-1.31                             | 91.76                   | 63-127                                    | Country                         |
| Kyrgyzstan                                       | 1.62                | 0.48-4.03                             | 52.28                   | 15.49-130.06                              | Region                          |
| Mongolia                                         | 1.62                | 0.48-4.03                             | 26.16                   | 7.75-65.09                                | Region                          |
| Tajikistan                                       | 1.62                | 0.48-4.03                             | 77.85                   | 23.07-193.67                              | Region                          |
| Turkmenistan                                     | 1.62                | 0.48-4.03                             | 48.1                    | 14.25-119.66                              | Region                          |
| Uzbekistan                                       | 1.62                | 0.48-4.03                             | 270.49                  | 80.14-672.88                              | Region                          |
| Europe, central                                  | 3.56                | 1-9.68                                | 1972.43                 | 535.9-5276.17                             | REGION                          |
| Albania                                          | 3.56                | 1-9.68                                | 52.14                   | 14.65-141.78                              | Region                          |
| Bosnia and Herzegovina                           | 3.56                | 1-9.68                                | 57.19                   | 16.07-155.52                              | Region                          |
| Bulgaria                                         | 3.56                | 1-9.68                                | 120.12                  | 33.74-326.61                              | Region                          |
| Croatia                                          | 3.56                | 1-9.68                                | 70.46                   | 19.79-191.59                              | Region                          |
| Czechia                                          | 3.56                | 1-9.68                                | 187.7                   | 52.72-510.37                              | Region                          |
| Hungary                                          | 4.27                | 4.16-4.37                             | 196.36                  | 170.98-223                                | Country                         |
| Montenegro                                       | 3.56                | 1-9.68                                | 11.06                   | 3.11-30.06                                | Region                          |
| Poland                                           | 3.56                | 1-9.68                                | 652.79                  | 183.37-1774.99                            | Region                          |
| Romania                                          | 3.56                | 1-9.68                                | 332.98                  | 93.53-905.41                              | Region                          |
| Serbia                                           | 3.56                | 1-9.68                                | 152.35                  | 42.8-414.27                               | Region                          |
| Slovakia                                         | 3.56                | 1-9.68                                | 94.64                   | 26.58-257.33                              | Region                          |
| Slovenia                                         | 3.56                | 1-9.68                                | 36.85                   | 10.35-100.21                              | Region                          |
| North Macedonia                                  | 3.56                | 1-9.68                                | 37.1                    | 10.42-100.88                              | Region                          |
| Europe, eastern                                  | 2.37                | 0.7-6.93                              | 1826.13                 | 558.93-4546.22                            | REGION                          |
| Belarus                                          | 2.37                | 0.7-6.93                              | 104.26                  | 30.8-304.87                               | Region                          |
| Estonia                                          | 5.23                | 1.43-15.85                            | 26.31                   | 7-68.02                                   | Country                         |
| Latvia                                           | 2.37                | 0.7-6.93                              | 20.6                    | 6.08-60.24                                | Region                          |
| Lithuania                                        | 4.49                | 1.25-13.89                            | 45.67                   | 11-122.02                                 | Country                         |
| Republic of Moldova                              | 2.37                | 0.7-6.93                              | 45.79                   | 13.52-133.88                              | Region                          |
| Russia                                           | 0.71                | 0.2-2.21                              | 389.14                  | 102.97-1003.6                             | Country                         |
| Ukraine                                          | 1.22                | 0.32-3.82                             | 199.4                   | 48-543.47                                 | Country                         |

|                                  |       |             |          |                  |              |
|----------------------------------|-------|-------------|----------|------------------|--------------|
| High income                      | 2.46  | 1.01-4.38   | 13170.34 | 5354.2-23359.77  | SUPER-REGION |
| Asia Pacific, high income        | 2.34  | 0.91-4.51   | 2119.64  | 819.85-4133.67   | REGION       |
| Brunei Darussalam                | 2.34  | 0.91-4.51   | 5.31     | 2.07-10.24       | Region       |
| Japan                            | 1.94  | 1.72-2.15   | 1197.51  | 1059-1359.08     | Country      |
| Republic of Korea                | 1.99  | 1.94-2.04   | 510.7    | 467-556          | Country      |
| Singapore                        | 2.34  | 0.91-4.51   | 71.65    | 27.87-138.1      | Region       |
| Australasia                      | 1.65  | 0.44-4.1    | 247.78   | 63.95-605.1      | REGION       |
| Australia                        | 0.8   | 0.63-0.99   | 102.16   | 73-137           | Country      |
| New Zealand                      | 1.65  | 0.44-4.1    | 39.1     | 10.43-97.17      | Region       |
| Europe, western                  | 4.44  | 2.8-6.44    | 9473.92  | 5946.85-13794.73 | REGION       |
| Austria                          | 4.44  | 2.8-6.44    | 197.11   | 124.31-285.9     | Region       |
| Belgium                          | 4.44  | 2.8-6.44    | 255.04   | 160.83-369.92    | Region       |
| Cyprus                           | 4.44  | 2.8-6.44    | 26.8     | 16.9-38.87       | Region       |
| Denmark                          | 4.62  | 4.44-4.79   | 133.07   | 111-158          | Country      |
| Finland                          | 4.44  | 2.8-6.44    | 121.31   | 76.5-175.96      | Region       |
| France                           | 2.92  | 2.84-3      | 924.63   | 857.98-991       | Country      |
| Germany                          | 2.16  | 2.1-2.22    | 896.67   | 833.95-955.02    | Country      |
| Greece                           | 2.93  | 2.73-3.13   | 149.56   | 125-177          | Country      |
| Iceland                          | 4.44  | 2.8-6.44    | 7.61     | 4.8-11.04        | Region       |
| Ireland                          | 4.44  | 2.8-6.44    | 108.83   | 68.63-157.86     | Region       |
| Israel                           | 4.44  | 2.8-6.44    | 191.26   | 120.61-277.41    | Region       |
| Italy                            | 4.34  | 3.84-4.86   | 1278.51  | 1111.95-1450.07  | Country      |
| Luxembourg                       | 4.44  | 2.8-6.44    | 14.06    | 8.86-20.39       | Region       |
| Malta                            | 3.06  | 2.48-3.66   | 6.77     | 2-12             | Country      |
| Netherlands                      | 8.41  | 6.51-10.62  | 719.35   | 537.98-917.07    | Country      |
| Norway                           | 6.8   | 6.07-7.58   | 186.38   | 155-220.02       | Country      |
| Portugal                         | 4.44  | 2.8-6.44    | 214.17   | 135.06-310.64    | Region       |
| Spain                            | 5.55  | 5.01-6.1    | 1276.15  | 1128-1426.02     | Country      |
| Sweden                           | 10.64 | 10.41-10.87 | 539.01   | 492-585.03       | Country      |
| Switzerland                      | 4.44  | 2.8-6.44    | 190.62   | 120.21-276.49    | Region       |
| United Kingdom                   | 7.77  | 7.62-7.93   | 2606.36  | 2496.95-2717     | Country      |
| Latin America, southern          | 1.23  | 0.22-3.43   | 405.95   | 76.95-1152.2     | REGION       |
| Argentina                        | 0.37  | 0.31-0.44   | 80.79    | 58-105           | Country      |
| Chile                            | 1.23  | 0.22-3.43   | 115.93   | 20.73-323.27     | Region       |
| Uruguay                          | 1.23  | 0.22-3.43   | 20.64    | 3.69-57.56       | Region       |
| North America, high income       | 3     | 1.18-6.23   | 5486.7   | 2181.73-11370.37 | REGION       |
| Canada                           | 2.14  | 2.06-2.22   | 400.99   | 360-445          | Country      |
| United States of America         | 4.02  | 3.89-4.15   | 6581.74  | 6340.98-6851.05  | Country      |
| Latin America and Caribbean      | 5.27  | 1.92-12.7   | 15155.29 | 5601.47-36521.9  | SUPER-REGION |
| Caribbean                        | 6.75  | 1.77-18.23  | 1982.49  | 775.75-4242.12   | REGION       |
| Antigua and Barbuda              | 6.75  | 1.77-18.23  | 3.19     | 0.84-8.62        | Region       |
| Bahamas                          | 6.75  | 1.77-18.23  | 12.9     | 3.38-34.84       | Region       |
| Barbados                         | 11.91 | 2.53-28.62  | 20.52    | 12-30            | Country      |
| Belize                           | 6.75  | 1.77-18.23  | 13.35    | 3.5-36.05        | Region       |
| Cuba                             | 11.25 | 1.96-32.05  | 804.27   | 311.83-1637.57   | Country      |
| Dominican Republic               | 6.75  | 1.77-18.23  | 365.67   | 95.89-987.57     | Region       |
| Grenada                          | 6.75  | 1.77-18.23  | 3.82     | 1-10.33          | Region       |
| Guyana                           | 6.75  | 1.77-18.23  | 26.7     | 7-72.1           | Region       |
| Haiti                            | 6.75  | 1.77-18.23  | 379.78   | 99.59-1025.68    | Region       |
| Jamaica                          | 6.75  | 1.77-18.23  | 99.19    | 26.01-267.89     | Region       |
| Puerto Rico                      | 7.9   | 1.68-19.28  | 132.03   | 109-156          | Country      |
| Saint Lucia                      | 6.75  | 1.77-18.23  | 6.1      | 1.6-16.48        | Region       |
| Saint Vincent and the Grenadines | 6.75  | 1.77-18.23  | 3.79     | 1-10.25          | Region       |
| Suriname                         | 6.75  | 1.77-18.23  | 19.9     | 5.22-53.75       | Region       |
| Trinidad and Tobago              | 6.75  | 1.77-18.23  | 46.64    | 12.23-125.95     | Region       |
| Virgin Island (US)               | 6.75  | 1.77-18.23  | 3.35     | 0.88-9.04        | Region       |
| Latin America, Andean            | 5.66  | 1.21-15.02  | 1760.38  | 371.65-4711.2    | REGION       |
| Bolivia                          | 5.66  | 1.21-15.02  | 331.54   | 70.88-879.8      | Region       |

|                                         |       |            |          |                   |              |
|-----------------------------------------|-------|------------|----------|-------------------|--------------|
| Ecuador                                 | 5.11  | 1.58-11.27 | 451.59   | 136.92-1021.1     | Country      |
| Peru                                    | 5.66  | 1.21-15.02 | 927.01   | 198.18-2460.01    | Region       |
| Latin America, central                  | 4.1   | 1.73-7.86  | 5205.63  | 2176.95-10012.7   | REGION       |
| Colombia                                | 1.21  | 1.17-1.25  | 302.36   | 268-338           | Country      |
| Costa Rica                              | 4.1   | 1.73-7.86  | 104.34   | 44.03-200.03      | Region       |
| El Salvador                             | 4.1   | 1.73-7.86  | 124.49   | 52.53-238.66      | Region       |
| Guatemala                               | 4.1   | 1.73-7.86  | 361.91   | 152.71-693.8      | Region       |
| Honduras                                | 4.1   | 1.73-7.86  | 202.9    | 85.61-388.97      | Region       |
| Mexico                                  | 8.21  | 4.76-12.44 | 5179.76  | 2992.95-7830.2    | Country      |
| Nicaragua                               | 4.1   | 1.73-7.86  | 133.85   | 56.48-256.61      | Region       |
| Panama                                  | 4.1   | 1.73-7.86  | 88.54    | 37.36-169.73      | Region       |
| Venezuela (Bolivarian Republic of)      | 5.26  | 1.63-11.67 | 736.55   | 228.7-1628.1      | Country      |
| Latin America, tropical                 | 8.18  | 1.98-23.41 | 8843.73  | 2168.02-25328.18  | REGION       |
| Brazil                                  | 10.89 | 2.61-25.99 | 11376.68 | 2708.8-27343.42   | Country      |
| Paraguay                                | 8.18  | 1.98-23.41 | 296.46   | 71.76-848.44      | Region       |
| North Africa and Middle East            | 4.61  | 1.16-11.63 | 14698.39 | 3684.32-37263.65  | SUPER-REGION |
| North Africa and the Middle East        | 5.3   | 2.39-9.76  | 16912.82 | 7685.5-31092.02   | REGION       |
| Afghanistan                             | 5.3   | 2.39-9.76  | 1058.74  | 477.43-1949.68    | Region       |
| Algeria                                 | 5.3   | 2.39-9.76  | 1174.12  | 529.46-2162.16    | Region       |
| Bahrain                                 | 5.3   | 2.39-9.76  | 58.33    | 26.3-107.41       | Region       |
| Egypt                                   | 5.3   | 2.39-9.76  | 2740.24  | 1235.69-5046.18   | Region       |
| Iran (Islamic Republic of)              | 5.53  | 3.53-7.93  | 2348.05  | 1503.95-3358.9    | Country      |
| Iraq                                    | 5.3   | 2.39-9.76  | 1078.96  | 486.55-1986.92    | Region       |
| Jordan                                  | 5.3   | 2.39-9.76  | 273.8    | 123.47-504.2      | Region       |
| Kuwait                                  | 5.3   | 2.39-9.76  | 138.57   | 62.49-255.17      | Region       |
| Lebanon                                 | 5.3   | 2.39-9.76  | 182.09   | 82.11-335.33      | Region       |
| Libya                                   | 5.3   | 2.39-9.76  | 183.84   | 82.9-338.55       | Region       |
| Morocco                                 | 5.3   | 2.39-9.76  | 970.79   | 437.77-1787.73    | Region       |
| Palestine                               | 5.3   | 2.39-9.76  | 137.11   | 61.83-252.49      | Region       |
| Oman                                    | 5.3   | 2.39-9.76  | 178.62   | 80.55-328.93      | Region       |
| Qatar                                   | 5.3   | 2.39-9.76  | 114.75   | 51.75-211.31      | Region       |
| Saudi Arabia                            | 4.58  | 1.43-10.32 | 922.41   | 285.95-2049.5     | Country      |
| Sudan                                   | 5.3   | 2.39-9.76  | 1161.08  | 523.58-2138.14    | Region       |
| Syrian Arab Republic                    | 5.3   | 2.39-9.76  | 464.28   | 209.36-854.98     | Region       |
| Sudan                                   | 5.3   | 2.39-9.76  | 1161.08  | 523.58-2138.14    | Region       |
| Tunisia                                 | 5.3   | 2.39-9.76  | 310.62   | 140.07-572        | Region       |
| Turkey                                  | 3.71  | 3.42-4     | 1546.39  | 1407.95-1696.03   | Country      |
| United Arab Emirates                    | 20.75 | 17.38-24.7 | 1420.02  | 1170.92-1701      | Country      |
| Yemen                                   | 5.3   | 2.39-9.76  | 796.32   | 359.1-1466.44     | Region       |
| South Asia                              | 2     | 0.32-5.52  | 18554.4  | 2897.93-51134.15  | SUPER-REGION |
| Asia, south                             | 1.23  | 0.25-3.58  | 11440.49 | 2357.8-33231.92   | REGION       |
| Bangladesh                              | 1.23  | 0.25-3.58  | 1024.06  | 208.14-2980.61    | Region       |
| Bhutan                                  | 1.23  | 0.25-3.58  | 5.04     | 1.03-14.68        | Region       |
| India                                   | 0.58  | 0.28-1.02  | 4177.37  | 1984.8-7295.62    | Country      |
| Nepal                                   | 1.23  | 0.25-3.58  | 164.19   | 33.37-477.87      | Region       |
| Pakistan                                | 1.23  | 0.25-3.58  | 1398.16  | 284.18-4069.44    | Region       |
| South East Asia, east Asia, and Oceania | 4.05  | 0.95-13.13 | 45090.31 | 10763.05-146669.1 | SUPER-REGION |
| Asia, east                              | 4.3   | 1.06-12.68 | 32940.84 | 8105.15-96822.72  | REGION       |
| China                                   | 3.63  | 3.53-3.72  | 27342.82 | 26563.95-28102    | Country      |
| Dem. People's Republic of Korea         | 4.3   | 1.06-12.68 | 542.16   | 133.65-1598.74    | Region       |
| Asia, South East                        | 4.05  | 0.95-13.13 | 45090.31 | 10763.05-146669.1 | REGION       |
| Cambodia                                | 4.05  | 0.95-13.13 | 330.58   | 77.54-1071.73     | Super-region |
| Indonesia                               | 4.05  | 0.95-13.13 | 5577.56  | 1308.32-18082.31  | Super-region |
| Lao People's Democratic Republic        | 4.05  | 0.95-13.13 | 147.9    | 34.69-479.48      | Super-region |
| Malaysia                                | 4.05  | 0.95-13.13 | 673.51   | 157.98-2183.51    | Super-region |
| Maldives                                | 4.05  | 0.95-13.13 | 13.89    | 3.26-45.03        | Super-region |
| Mauritius                               | 4.05  | 0.95-13.13 | 25.41    | 5.96-82.39        | Super-region |

|                                  |      |            |           |                   |              |
|----------------------------------|------|------------|-----------|-------------------|--------------|
| Myanmar                          | 4.05 | 0.95-13.13 | 1061.92   | 249.09-3442.7     | Super-region |
| Philippines                      | 4.05 | 0.95-13.13 | 2228.66   | 522.77-7225.26    | Super-region |
| Seychelles                       | 4.05 | 0.95-13.13 | 2.04      | 0.48-6.62         | Super-region |
| Sri Lanka                        | 4.05 | 0.95-13.13 | 415.81    | 97.54-1348.05     | Super-region |
| Thailand                         | 4.05 | 0.95-13.13 | 1375.52   | 322.65-4459.39    | Super-region |
| Timor-Leste                      | 4.05 | 0.95-13.13 | 26.98     | 6.33-87.48        | Super-region |
| Vietnam                          | 4.05 | 0.95-13.13 | 1968      | 461.63-6380.19    | Super-region |
| Oceania                          | 4.05 | 0.95-13.13 | 45090.31  | 10763.05-146669.1 | REGION       |
| Fiji                             | 4.05 | 0.95-13.13 | 18.39     | 4.31-59.61        | Super-region |
| Guam                             | 4.05 | 0.95-13.13 | 3.45      | 0.81-11.18        | Super-region |
| Kiribati                         | 4.05 | 0.95-13.13 | 2.38      | 0.56-7.71         | Super-region |
| Marshall Islands                 | 4.05 | 0.95-13.13 | 1.16      | 0.27-3.75         | Super-region |
| Micronesia (Fed. States of)      | 4.05 | 0.95-13.13 | 2.37      | 0.56-7.68         | Super-region |
| Papua New Guinea                 | 4.05 | 0.95-13.13 | 185.01    | 43.4-599.79       | Super-region |
| Samoa                            | 4.05 | 0.95-13.13 | 4.16      | 0.98-13.48        | Super-region |
| Solomon Islands                  | 4.05 | 0.95-13.13 | 14.15     | 3.32-45.86        | Super-region |
| Tonga                            | 4.05 | 0.95-13.13 | 2.14      | 0.5-6.95          | Super-region |
| Vanuatu                          | 4.05 | 0.95-13.13 | 6.31      | 1.48-20.44        | Super-region |
| Sub-Saharan Africa               | 3.3  | 1.2-8.29   | 129635.38 | 47034.88-326300.3 | SUPER-REGION |
| Sub-Saharan Africa, central      | 3.3  | 1.2-8.29   | 129635.38 | 47034.88-326300.3 | REGION       |
| Angola                           | 3.3  | 1.2-8.29   | 536.61    | 195.13-1348.03    | Global       |
| Central African Republic         | 3.3  | 1.2-8.29   | 79        | 28.73-198.47      | Global       |
| Congo                            | 3.3  | 1.2-8.29   | 90.97     | 33.08-228.53      | Global       |
| Democratic Republic of the Congo | 3.3  | 1.2-8.29   | 1475.43   | 536.52-3706.47    | Global       |
| Equatorial Guinea                | 3.3  | 1.2-8.29   | 25.75     | 9.36-64.69        | Global       |
| Gabon                            | 3.3  | 1.2-8.29   | 37.38     | 13.59-93.91       | Global       |
| Sub-Saharan Africa, eastern      | 3.3  | 1.2-8.29   | 129635.38 | 47034.88-326300.3 | REGION       |
| Burundi                          | 3.3  | 1.2-8.29   | 194.7     | 70.8-489.1        | Global       |
| Comoros                          | 3.3  | 1.2-8.29   | 14.48     | 5.26-36.36        | Global       |
| Djibouti                         | 3.3  | 1.2-8.29   | 17.13     | 6.23-43.02        | Global       |
| Eritrea                          | 3.3  | 1.2-8.29   | 58.66     | 21.33-147.36      | Global       |
| Ethiopia                         | 3.3  | 1.2-8.29   | 1898.05   | 690.2-4768.13     | Global       |
| Kenya                            | 3.3  | 1.2-8.29   | 881.71    | 320.62-2214.97    | Global       |
| Madagascar                       | 3.3  | 1.2-8.29   | 455.88    | 165.77-1145.23    | Global       |
| Malawi                           | 3.3  | 1.2-8.29   | 311.32    | 113.21-782.08     | Global       |
| Mozambique                       | 3.3  | 1.2-8.29   | 501.21    | 182.26-1259.1     | Global       |
| Rwanda                           | 3.3  | 1.2-8.29   | 210.13    | 76.41-527.86      | Global       |
| Somalia                          | 3.3  | 1.2-8.29   | 261.49    | 95.09-656.91      | Global       |
| South Sudan                      | 3.3  | 1.2-8.29   | 184.9     | 67.24-464.49      | Global       |
| Uganda                           | 3.3  | 1.2-8.29   | 744.04    | 270.56-1869.11    | Global       |
| United Republic of Tanzania      | 3.3  | 1.2-8.29   | 985.09    | 358.21-2474.66    | Global       |
| Zambia                           | 3.3  | 1.2-8.29   | 300.4     | 109.24-754.64     | Global       |
| Sub-Saharan Africa, southern     | 3.3  | 1.2-8.29   | 129635.38 | 47034.88-326300.3 | REGION       |
| Botswana                         | 3.3  | 1.2-8.29   | 37.59     | 13.67-94.43       | Global       |
| Lesotho                          | 3.3  | 1.2-8.29   | 34.88     | 12.68-87.62       | Global       |
| Namibia                          | 3.3  | 1.2-8.29   | 40.65     | 14.78-102.11      | Global       |
| South Africa                     | 3.3  | 1.2-8.29   | 964.13    | 350.59-2422.01    | Global       |
| Eswatini                         | 3.3  | 1.2-8.29   | 18.82     | 6.84-47.27        | Global       |
| Zimbabwe                         | 3.3  | 1.2-8.29   | 234.04    | 85.1-587.93       | Global       |
| Sub-Saharan Africa, western      | 3.3  | 1.2-8.29   | 129635.38 | 47034.88-326300.3 | REGION       |
| Benin                            | 3.3  | 1.2-8.29   | 199.79    | 72.65-501.9       | Global       |
| Burkina Faso                     | 3.3  | 1.2-8.29   | 344.68    | 125.34-865.87     | Global       |
| Cote d'Ivoire                    | 3.3  | 1.2-8.29   | 438.91    | 159.6-1102.6      | Global       |
| Cameroon                         | 3.3  | 1.2-8.29   | 438.14    | 159.32-1100.67    | Global       |
| Cabo Verde                       | 3.3  | 1.2-8.29   | 9.21      | 3.35-23.14        | Global       |
| Chad                             | 3.3  | 1.2-8.29   | 270.61    | 98.4-679.79       | Global       |
| Gambia                           | 3.3  | 1.2-8.29   | 39.55     | 14.38-99.36       | Global       |
| Ghana                            | 3.3  | 1.2-8.29   | 519.75    | 189-1305.67       | Global       |

|                       |     |          |        |                 |        |
|-----------------------|-----|----------|--------|-----------------|--------|
| Guinea                | 3.3 | 1.2-8.29 | 209.66 | 76.24-526.68    | Global |
| Guinea-Bissau         | 3.3 | 1.2-8.29 | 31.77  | 11.55-79.81     | Global |
| Liberia               | 3.3 | 1.2-8.29 | 83.9   | 30.51-210.78    | Global |
| Mali                  | 3.3 | 1.2-8.29 | 334.79 | 121.74-841.03   | Global |
| Mauritania            | 3.3 | 1.2-8.29 | 77.05  | 28.02-193.57    | Global |
| Niger                 | 3.3 | 1.2-8.29 | 401.62 | 146.04-1008.91  | Global |
| Nigeria               | 3.3 | 1.2-8.29 | 3447.5 | 1253.64-8660.53 | Global |
| Sao Tome and Principe | 3.3 | 1.2-8.29 | 3.62   | 1.32-9.09       | Global |
| Senegal               | 3.3 | 1.2-8.29 | 269.64 | 98.05-677.36    | Global |
| Sierra Leone          | 3.3 | 1.2-8.29 | 131.38 | 47.77-330.04    | Global |
| Togo                  | 3.3 | 1.2-8.29 | 135.94 | 49.43-341.5     | Global |

**Table S26. Estimated point prevalence of SLE diagnosed by physician/ dermatologist for male adults.**

| Country/Region/Super-region                      | Expected Prevalence | 95% Confidence Interval of Prevalence | Expected Patient Number | 95% Confidence Interval of Patient Number | Hierarchy of Region in Estimate |
|--------------------------------------------------|---------------------|---------------------------------------|-------------------------|-------------------------------------------|---------------------------------|
| Global                                           | 4.65                | 1.69-11.65                            | 120298.69               | 43645.65-302117.02                        | GLOBAL                          |
| Central Europe, eastern Europe, and central Asia | 3.14                | 1.07-6.57                             | 4576.53                 | 1553.68-9543.75                           | SUPER-REGION                    |
| Asia, central                                    | 2.39                | 0.71-5.92                             | 697.37                  | 202.98-1758                               | REGION                          |
| Armenia                                          | 2.39                | 0.71-5.92                             | 23.3                    | 6.92-57.72                                | Region                          |
| Azerbaijan                                       | 2.39                | 0.71-5.92                             | 82.52                   | 24.51-204.4                               | Region                          |
| Georgia                                          | 2.39                | 0.71-5.92                             | 32.66                   | 9.7-80.89                                 | Region                          |
| Kazakhstan                                       | 1.47                | 1.11-1.92                             | 84.16                   | 57-114.02                                 | Country                         |
| Kyrgyzstan                                       | 2.39                | 0.71-5.92                             | 44.98                   | 13.36-111.4                               | Region                          |
| Mongolia                                         | 2.39                | 0.71-5.92                             | 23.64                   | 7.02-58.54                                | Region                          |
| Tajikistan                                       | 2.39                | 0.71-5.92                             | 61.26                   | 18.2-151.75                               | Region                          |
| Turkmenistan                                     | 2.39                | 0.71-5.92                             | 42.61                   | 12.66-105.55                              | Region                          |
| Uzbekistan                                       | 2.39                | 0.71-5.92                             | 249.74                  | 74.19-618.59                              | Region                          |
| Europe, central                                  | 4.35                | 1.22-11.82                            | 1895.25                 | 512.85-5074.57                            | REGION                          |
| Albania                                          | 4.35                | 1.22-11.82                            | 47.73                   | 13.39-129.69                              | Region                          |
| Bosnia and Herzegovina                           | 4.35                | 1.22-11.82                            | 55.58                   | 15.59-151.02                              | Region                          |
| Bulgaria                                         | 4.35                | 1.22-11.82                            | 116.89                  | 32.78-317.61                              | Region                          |
| Croatia                                          | 4.35                | 1.22-11.82                            | 68.33                   | 19.16-185.66                              | Region                          |
| Czechia                                          | 4.35                | 1.22-11.82                            | 180.78                  | 50.7-491.23                               | Region                          |
| Hungary                                          | 5.19                | 5.06-5.32                             | 188.8                   | 164-216                                   | Country                         |
| Montenegro                                       | 4.35                | 1.22-11.82                            | 10.05                   | 2.82-27.31                                | Region                          |
| Poland                                           | 4.35                | 1.22-11.82                            | 630.87                  | 176.93-1714.23                            | Region                          |
| Romania                                          | 4.35                | 1.22-11.82                            | 317.89                  | 89.16-863.78                              | Region                          |
| Serbia                                           | 4.35                | 1.22-11.82                            | 144.45                  | 40.51-392.49                              | Region                          |
| Slovakia                                         | 4.35                | 1.22-11.82                            | 90.88                   | 25.49-246.95                              | Region                          |
| Slovenia                                         | 4.35                | 1.22-11.82                            | 35.93                   | 10.08-97.63                               | Region                          |
| North Macedonia                                  | 4.35                | 1.22-11.82                            | 34.98                   | 9.81-95.05                                | Region                          |
| Europe, eastern                                  | 3                   | 0.89-8.79                             | 1740.52                 | 530-4325.12                               | REGION                          |
| Belarus                                          | 3                   | 0.89-8.79                             | 100.14                  | 29.71-293.42                              | Region                          |
| Estonia                                          | 6.5                 | 1.78-19.7                             | 25.25                   | 6-66                                      | Country                         |
| Latvia                                           | 3                   | 0.89-8.79                             | 19.94                   | 5.92-58.43                                | Region                          |
| Lithuania                                        | 5.53                | 1.54-17.11                            | 43.83                   | 10-115                                    | Country                         |
| Republic of Moldova                              | 3                   | 0.89-8.79                             | 44.93                   | 13.33-131.65                              | Region                          |
| Russia                                           | 0.91                | 0.26-2.83                             | 370.06                  | 99-957.67                                 | Country                         |
| Ukraine                                          | 1.51                | 0.39-4.74                             | 190.82                  | 46-520.57                                 | Country                         |
| High income                                      | 3.06                | 1.26-5.45                             | 12605.27                | 5088.9-22332.02                           | SUPER-REGION                    |
| Asia Pacific, high income                        | 2.75                | 1.07-5.32                             | 2053.14                 | 800.75-4020.17                            | REGION                          |
| Brunei Darussalam                                | 2.75                | 1.07-5.32                             | 4.38                    | 1.7-8.48                                  | Region                          |
| Japan                                            | 2.28                | 2.03-2.53                             | 1160.19                 | 1026.97-1314.05                           | Country                         |
| Republic of Korea                                | 2.34                | 2.29-2.4                              | 494.48                  | 452-539                                   | Country                         |
| Singapore                                        | 2.75                | 1.07-5.32                             | 70.25                   | 27.33-135.89                              | Region                          |
| Australasia                                      | 2.13                | 0.57-5.27                             | 235.01                  | 61.93-575.15                              | REGION                          |



|                                  |       |             |          |                  |              |
|----------------------------------|-------|-------------|----------|------------------|--------------|
| Australia                        | 1.03  | 0.81-1.28   | 96.98    | 70-131           | Country      |
| New Zealand                      | 2.13  | 0.57-5.27   | 36.94    | 9.89-91.4        | Region       |
| Europe, western                  | 5.46  | 3.44-7.9    | 9091.46  | 5707.92-13209.35 | REGION       |
| Austria                          | 5.46  | 3.44-7.9    | 193.11   | 121.67-279.41    | Region       |
| Belgium                          | 5.46  | 3.44-7.9    | 240.09   | 151.27-347.39    | Region       |
| Cyprus                           | 5.46  | 3.44-7.9    | 25.22    | 15.89-36.5       | Region       |
| Denmark                          | 5.74  | 5.51-5.95   | 127.33   | 106-150.02       | Country      |
| Finland                          | 5.46  | 3.44-7.9    | 116.33   | 73.29-168.32     | Region       |
| France                           | 3.71  | 3.61-3.81   | 880.91   | 817-947          | Country      |
| Germany                          | 2.6   | 2.53-2.67   | 865.14   | 803.98-927       | Country      |
| Greece                           | 3.51  | 3.28-3.75   | 144.23   | 119.97-171.02    | Country      |
| Iceland                          | 5.46  | 3.44-7.9    | 6.91     | 4.35-10          | Region       |
| Ireland                          | 5.46  | 3.44-7.9    | 96.36    | 60.71-139.42     | Region       |
| Israel                           | 5.46  | 3.44-7.9    | 148.99   | 93.87-215.57     | Region       |
| Italy                            | 5.16  | 4.57-5.79   | 1235.77  | 1074-1404.15     | Country      |
| Luxembourg                       | 5.46  | 3.44-7.9    | 13.6     | 8.57-19.68       | Region       |
| Malta                            | 3.67  | 2.98-4.39   | 6.57     | 2-12             | Country      |
| Netherlands                      | 10.38 | 8.03-13.1   | 689.79   | 520.97-878.1     | Country      |
| Norway                           | 8.5   | 7.6-9.48    | 178.11   | 148-212          | Country      |
| Portugal                         | 5.46  | 3.44-7.9    | 211.41   | 133.2-305.88     | Region       |
| Spain                            | 6.69  | 6.04-7.37   | 1229.88  | 1082.97-1374.05  | Country      |
| Sweden                           | 13.3  | 13.01-13.59 | 515.18   | 469-562          | Country      |
| Switzerland                      | 5.46  | 3.44-7.9    | 186.34   | 117.4-269.61     | Region       |
| United Kingdom                   | 9.75  | 9.56-9.95   | 2489.38  | 2381.98-2594     | Country      |
| Latin America, southern          | 1.67  | 0.3-4.68    | 380.03   | 70.97-1079.27    | REGION       |
| Argentina                        | 0.51  | 0.43-0.61   | 75       | 54-96.02         | Country      |
| Chile                            | 1.67  | 0.3-4.68    | 115.58   | 20.76-323.9      | Region       |
| Uruguay                          | 1.67  | 0.3-4.68    | 19.9     | 3.58-55.77       | Region       |
| North America, high income       | 3.82  | 1.5-7.92    | 5223.42  | 2080.85-10814.45 | REGION       |
| Canada                           | 2.62  | 2.52-2.73   | 384.95   | 345.97-428.02    | Country      |
| United States of America         | 5.13  | 4.98-5.3    | 6259.48  | 6022.95-6513.02  | Country      |
| Latin America and Caribbean      | 7.36  | 2.69-17.73  | 14092.85 | 5189.92-33859.45 | SUPER-REGION |
| Caribbean                        | 9.42  | 2.46-25.4   | 1845.08  | 718.88-3980.25   | REGION       |
| Antigua and Barbuda              | 9.42  | 2.46-25.4   | 3.1      | 0.81-8.35        | Region       |
| Bahamas                          | 9.42  | 2.46-25.4   | 12.41    | 3.24-33.45       | Region       |
| Barbados                         | 15.06 | 3.2-36.23   | 19.58    | 11-29            | Country      |
| Belize                           | 9.42  | 2.46-25.4   | 11.19    | 2.92-30.17       | Region       |
| Cuba                             | 13.89 | 2.42-39.59  | 770.91   | 302.72-1571.35   | Country      |
| Dominican Republic               | 9.42  | 2.46-25.4   | 321.26   | 83.9-866.24      | Region       |
| Grenada                          | 9.42  | 2.46-25.4   | 3.69     | 0.96-9.94        | Region       |
| Guyana                           | 9.42  | 2.46-25.4   | 23.18    | 6.05-62.49       | Region       |
| Haiti                            | 9.42  | 2.46-25.4   | 298.36   | 77.91-804.49     | Region       |
| Jamaica                          | 9.42  | 2.46-25.4   | 93.7     | 24.47-252.66     | Region       |
| Puerto Rico                      | 9.97  | 2.12-24.31  | 125.88   | 103-150          | Country      |
| Saint Lucia                      | 9.42  | 2.46-25.4   | 6.32     | 1.65-17.04       | Region       |
| Saint Vincent and the Grenadines | 9.42  | 2.46-25.4   | 3.7      | 0.97-9.98        | Region       |
| Suriname                         | 9.42  | 2.46-25.4   | 17.66    | 4.61-47.63       | Region       |
| Trinidad and Tobago              | 9.42  | 2.46-25.4   | 47.39    | 12.38-127.78     | Region       |
| Virgin Island (US)               | 9.42  | 2.46-25.4   | 3.38     | 0.88-9.11        | Region       |
| Latin America, Andean            | 8.08  | 1.72-21.39  | 1628.02  | 341.92-4354.25   | REGION       |
| Bolivia                          | 8.08  | 1.72-21.39  | 280.93   | 59.8-743.7       | Region       |
| Ecuador                          | 7.46  | 2.3-16.46   | 414.93   | 123.98-933.3     | Country      |
| Peru                             | 8.08  | 1.72-21.39  | 897.82   | 191.12-2376.77   | Region       |
| Latin America, central           | 5.93  | 2.51-11.38  | 4797.33  | 2012.7-9215.08   | REGION       |
| Colombia                         | 1.66  | 1.61-1.71   | 282.46   | 250-315.05       | Country      |
| Costa Rica                       | 5.93  | 2.51-11.38  | 107.7    | 45.59-206.69     | Region       |
| El Salvador                      | 5.93  | 2.51-11.38  | 110.22   | 46.65-211.52     | Region       |
| Guatemala                        | 5.93  | 2.51-11.38  | 283.68   | 120.07-544.39    | Region       |

|                                         |       |            |          |                    |              |
|-----------------------------------------|-------|------------|----------|--------------------|--------------|
| Honduras                                | 5.93  | 2.51-11.38 | 170.2    | 72.04-326.63       | Region       |
| Mexico                                  | 11.84 | 6.86-17.97 | 4777.69  | 2762.87-7236.62    | Country      |
| Nicaragua                               | 5.93  | 2.51-11.38 | 115.63   | 48.94-221.91       | Region       |
| Panama                                  | 5.93  | 2.51-11.38 | 82.64    | 34.98-158.59       | Region       |
| Venezuela (Bolivarian Republic of)      | 7.72  | 2.39-17.14 | 676.26   | 210.7-1488.15      | Country      |
| Latin America, tropical                 | 10.95 | 2.66-31.32 | 8317.41  | 2042.88-23818.1    | REGION       |
| Brazil                                  | 14.53 | 3.48-34.55 | 10708.25 | 2548.55-25714.28   | Country      |
| Paraguay                                | 10.95 | 2.66-31.32 | 244.6    | 59.42-699.63       | Region       |
| North Africa and Middle East            | 6.87  | 1.74-17.34 | 13425.09 | 3365.2-33975.22    | SUPER-REGION |
| North Africa and the Middle East        | 7.91  | 3.57-14.55 | 15448.83 | 7049.55-28323.25   | REGION       |
| Afghanistan                             | 7.91  | 3.57-14.55 | 732.83   | 330.75-1348        | Region       |
| Algeria                                 | 7.91  | 3.57-14.55 | 1089.9   | 491.9-2004.82      | Region       |
| Bahrain                                 | 7.91  | 3.57-14.55 | 70.61    | 31.87-129.89       | Region       |
| Egypt                                   | 7.91  | 3.57-14.55 | 2322.18  | 1048.06-4271.52    | Region       |
| Iran (Islamic Republic of)              | 7.58  | 4.84-10.86 | 2194.84  | 1412.7-3151.42     | Country      |
| Iraq                                    | 7.91  | 3.57-14.55 | 825.2    | 372.44-1517.91     | Region       |
| Jordan                                  | 7.91  | 3.57-14.55 | 232.02   | 104.72-426.79      | Region       |
| Kuwait                                  | 7.91  | 3.57-14.55 | 158.07   | 71.34-290.77       | Region       |
| Lebanon                                 | 7.91  | 3.57-14.55 | 178.36   | 80.5-328.09        | Region       |
| Libya                                   | 7.91  | 3.57-14.55 | 174.09   | 78.57-320.23       | Region       |
| Morocco                                 | 7.91  | 3.57-14.55 | 927.71   | 418.7-1706.47      | Region       |
| Palestine                               | 7.91  | 3.57-14.55 | 104.71   | 47.26-192.6        | Region       |
| Oman                                    | 7.91  | 3.57-14.55 | 212.55   | 95.93-390.97       | Region       |
| Qatar                                   | 7.91  | 3.57-14.55 | 150.7    | 68.01-277.2        | Region       |
| Saudi Arabia                            | 5.97  | 1.87-13.41 | 873.44   | 268.9-1939.27      | Country      |
| Sudan                                   | 7.91  | 3.57-14.55 | 840.96   | 379.55-1546.9      | Region       |
| Syrian Arab Republic                    | 7.91  | 3.57-14.55 | 412.09   | 185.99-758.02      | Region       |
| Sudan                                   | 7.91  | 3.57-14.55 | 840.96   | 379.55-1546.9      | Region       |
| Tunisia                                 | 7.91  | 3.57-14.55 | 314.27   | 141.84-578.08      | Region       |
| Turkey                                  | 5.17  | 4.77-5.57  | 1439.39  | 1309.98-1579       | Country      |
| United Arab Emirates                    | 23.53 | 19.71-28   | 1386.81  | 1144-1660.12       | Country      |
| Yemen                                   | 7.91  | 3.57-14.55 | 592.54   | 267.43-1089.94     | Region       |
| South Asia                              | 2.92  | 0.47-8.05  | 17049.62 | 2680.82-46999.82   | SUPER-REGION |
| Asia, south                             | 1.8   | 0.37-5.23  | 10512.89 | 2162.95-30614.82   | REGION       |
| Bangladesh                              | 1.8   | 0.37-5.23  | 949.99   | 195.28-2760.25     | Region       |
| Bhutan                                  | 1.8   | 0.37-5.23  | 4.98     | 1.02-14.48         | Region       |
| India                                   | 0.84  | 0.4-1.47   | 3857.6   | 1834.97-6748.05    | Country      |
| Nepal                                   | 1.8   | 0.37-5.23  | 134.96   | 27.74-392.14       | Region       |
| Pakistan                                | 1.8   | 0.37-5.23  | 1122.09  | 230.65-3260.29     | Region       |
| South East Asia, east Asia, and Oceania | 5.28  | 1.25-17.13 | 42659.55 | 10148.65-138515.22 | SUPER-REGION |
| Asia, east                              | 5.42  | 1.34-16    | 31424.8  | 7764.05-92452.27   | REGION       |
| China                                   | 4.57  | 4.45-4.69  | 26088.81 | 25352.75-26823.08  | Country      |
| Dem. People's Republic of Korea         | 5.42  | 1.34-16    | 489.68   | 121.07-1445.56     | Region       |
| Asia, South East                        | 5.28  | 1.25-17.13 | 42659.55 | 10148.65-138515.22 | REGION       |
| Cambodia                                | 5.28  | 1.25-17.13 | 252.92   | 59.88-820.54       | Super-region |
| Indonesia                               | 5.28  | 1.25-17.13 | 4720.08  | 1117.44-15313.46   | Super-region |
| Lao People's Democratic Republic        | 5.28  | 1.25-17.13 | 111.37   | 26.37-361.31       | Super-region |
| Malaysia                                | 5.28  | 1.25-17.13 | 599.13   | 141.84-1943.78     | Super-region |
| Maldives                                | 5.28  | 1.25-17.13 | 14.51    | 3.43-47.06         | Super-region |
| Mauritius                               | 5.28  | 1.25-17.13 | 24.84    | 5.88-80.6          | Super-region |
| Myanmar                                 | 5.28  | 1.25-17.13 | 881.69   | 208.73-2860.47     | Super-region |
| Philippines                             | 5.28  | 1.25-17.13 | 1728.99  | 409.32-5609.39     | Super-region |
| Seychelles                              | 5.28  | 1.25-17.13 | 1.86     | 0.44-6.02          | Super-region |
| Sri Lanka                               | 5.28  | 1.25-17.13 | 362.81   | 85.89-1177.07      | Super-region |
| Thailand                                | 5.28  | 1.25-17.13 | 1360.88  | 322.18-4415.12     | Super-region |

|                                         |      |            |           |                    |              |
|-----------------------------------------|------|------------|-----------|--------------------|--------------|
| <b>Timor-Leste</b>                      | 5.28 | 1.25-17.13 | 18.04     | 4.27-58.52         | Super-region |
| <b>Vietnam</b>                          | 5.28 | 1.25-17.13 | 1759.51   | 416.55-5708.4      | Super-region |
| <b>Oceania</b>                          | 5.28 | 1.25-17.13 | 42659.55  | 10148.65-138515.22 | REGION       |
| <b>Fiji</b>                             | 5.28 | 1.25-17.13 | 14.9      | 3.53-48.34         | Super-region |
| <b>Guam</b>                             | 5.28 | 1.25-17.13 | 3.03      | 0.72-9.82          | Super-region |
| <b>Kiribati</b>                         | 5.28 | 1.25-17.13 | 1.66      | 0.39-5.39          | Super-region |
| <b>Marshall Islands</b>                 | 5.28 | 1.25-17.13 | 0.74      | 0.17-2.39          | Super-region |
| <b>Micronesia (Fed. States of)</b>      | 5.28 | 1.25-17.13 | 1.8       | 0.43-5.86          | Super-region |
| <b>Papua New Guinea</b>                 | 5.28 | 1.25-17.13 | 130.25    | 30.84-422.58       | Super-region |
| <b>Samoa</b>                            | 5.28 | 1.25-17.13 | 2.87      | 0.68-9.31          | Super-region |
| <b>Solomon Islands</b>                  | 5.28 | 1.25-17.13 | 9.04      | 2.14-29.34         | Super-region |
| <b>Tonga</b>                            | 5.28 | 1.25-17.13 | 1.47      | 0.35-4.78          | Super-region |
| <b>Vanuatu</b>                          | 5.28 | 1.25-17.13 | 4.18      | 0.99-13.56         | Super-region |
| <b>Sub-Saharan Africa</b>               | 4.65 | 1.69-11.65 | 120298.69 | 43645.65-302117.02 | SUPER-REGION |
| <b>Sub-Saharan Africa, central</b>      | 4.65 | 1.69-11.65 | 120298.69 | 43645.65-302117.02 | REGION       |
| <b>Angola</b>                           | 4.65 | 1.69-11.65 | 318.56    | 115.78-798.1       | Global       |
| <b>Central African Republic</b>         | 4.65 | 1.69-11.65 | 48.24     | 17.53-120.86       | Global       |
| <b>Congo</b>                            | 4.65 | 1.69-11.65 | 61.37     | 22.3-153.75        | Global       |
| <b>Democratic Republic of the Congo</b> | 4.65 | 1.69-11.65 | 895.74    | 325.55-2244.18     | Global       |
| <b>Equatorial Guinea</b>                | 4.65 | 1.69-11.65 | 21.29     | 7.74-53.33         | Global       |
| <b>Gabon</b>                            | 4.65 | 1.69-11.65 | 28.69     | 10.43-71.89        | Global       |
| <b>Sub-Saharan Africa, eastern</b>      | 4.65 | 1.69-11.65 | 120298.69 | 43645.65-302117.02 | REGION       |
| <b>Burundi</b>                          | 4.65 | 1.69-11.65 | 120       | 43.61-300.63       | Global       |
| <b>Comoros</b>                          | 4.65 | 1.69-11.65 | 10.25     | 3.73-25.68         | Global       |
| <b>Djibouti</b>                         | 4.65 | 1.69-11.65 | 14.92     | 5.42-37.38         | Global       |
| <b>Eritrea</b>                          | 4.65 | 1.69-11.65 | 39.16     | 14.23-98.12        | Global       |
| <b>Ethiopia</b>                         | 4.65 | 1.69-11.65 | 1289.61   | 468.7-3230.96      | Global       |
| <b>Kenya</b>                            | 4.65 | 1.69-11.65 | 615.42    | 223.67-1541.85     | Global       |
| <b>Madagascar</b>                       | 4.65 | 1.69-11.65 | 311.81    | 113.33-781.21      | Global       |
| <b>Malawi</b>                           | 4.65 | 1.69-11.65 | 195.34    | 70.99-489.39       | Global       |
| <b>Mozambique</b>                       | 4.65 | 1.69-11.65 | 303.32    | 110.24-759.92      | Global       |
| <b>Rwanda</b>                           | 4.65 | 1.69-11.65 | 145.48    | 52.87-364.47       | Global       |
| <b>Somalia</b>                          | 4.65 | 1.69-11.65 | 154.35    | 56.1-386.71        | Global       |
| <b>South Sudan</b>                      | 4.65 | 1.69-11.65 | 123.44    | 44.86-309.26       | Global       |
| <b>Uganda</b>                           | 4.65 | 1.69-11.65 | 432.03    | 157.02-1082.39     | Global       |
| <b>United Republic of Tanzania</b>      | 4.65 | 1.69-11.65 | 625.59    | 227.37-1567.34     | Global       |
| <b>Zambia</b>                           | 4.65 | 1.69-11.65 | 184.02    | 66.88-461.05       | Global       |
| <b>Sub-Saharan Africa, southern</b>     | 4.65 | 1.69-11.65 | 120298.69 | 43645.65-302117.02 | REGION       |
| <b>Botswana</b>                         | 4.65 | 1.69-11.65 | 29.19     | 10.61-73.13        | Global       |
| <b>Lesotho</b>                          | 4.65 | 1.69-11.65 | 28.03     | 10.19-70.23        | Global       |
| <b>Namibia</b>                          | 4.65 | 1.69-11.65 | 29.85     | 10.85-74.78        | Global       |
| <b>South Africa</b>                     | 4.65 | 1.69-11.65 | 841.96    | 306-2109.43        | Global       |
| <b>Eswatini</b>                         | 4.65 | 1.69-11.65 | 13.31     | 4.84-33.35         | Global       |
| <b>Zimbabwe</b>                         | 4.65 | 1.69-11.65 | 146.41    | 53.21-366.8        | Global       |
| <b>Sub-Saharan Africa, western</b>      | 4.65 | 1.69-11.65 | 120298.69 | 43645.65-302117.02 | REGION       |
| <b>Benin</b>                            | 4.65 | 1.69-11.65 | 131.19    | 47.68-328.67       | Global       |
| <b>Burkina Faso</b>                     | 4.65 | 1.69-11.65 | 211.52    | 76.87-529.93       | Global       |
| <b>Cote d'Ivoire</b>                    | 4.65 | 1.69-11.65 | 295.04    | 107.23-739.19      | Global       |
| <b>Cameroon</b>                         | 4.65 | 1.69-11.65 | 288.7     | 104.93-723.31      | Global       |
| <b>Cabo Verde</b>                       | 4.65 | 1.69-11.65 | 8.16      | 2.97-20.45         | Global       |
| <b>Chad</b>                             | 4.65 | 1.69-11.65 | 159.78    | 58.07-400.3        | Global       |
| <b>Gambia</b>                           | 4.65 | 1.69-11.65 | 24.82     | 9.02-62.18         | Global       |
| <b>Ghana</b>                            | 4.65 | 1.69-11.65 | 383.92    | 139.53-961.87      | Global       |
| <b>Guinea</b>                           | 4.65 | 1.69-11.65 | 127.57    | 46.36-319.61       | Global       |
| <b>Guinea-Bissau</b>                    | 4.65 | 1.69-11.65 | 20.63     | 7.5-51.69          | Global       |
| <b>Liberia</b>                          | 4.65 | 1.69-11.65 | 56.77     | 20.63-142.23       | Global       |
| <b>Mali</b>                             | 4.65 | 1.69-11.65 | 193.64    | 70.38-485.15       | Global       |
| <b>Mauritania</b>                       | 4.65 | 1.69-11.65 | 53.9      | 19.59-135.04       | Global       |

|                       |      |            |         |                |        |
|-----------------------|------|------------|---------|----------------|--------|
| Niger                 | 4.65 | 1.69-11.65 | 219.1   | 79.63-548.92   | Global |
| Nigeria               | 4.65 | 1.69-11.65 | 2208.46 | 802.64-5533.01 | Global |
| Sao Tome and Principe | 4.65 | 1.69-11.65 | 2.36    | 0.86-5.92      | Global |
| Senegal               | 4.65 | 1.69-11.65 | 170.54  | 61.98-427.27   | Global |
| Sierra Leone          | 4.65 | 1.69-11.65 | 89.74   | 32.62-224.84   | Global |
| Togo                  | 4.65 | 1.69-11.65 | 92.3    | 33.55-231.25   | Global |

**Table S27. Estimated point prevalence of SLE diagnosed by physician/ dermatologist for female.**

| Country/Region/Super-region                      | Expected Prevalence | 95% Confidence Interval of Prevalence | Expected Patient Number | 95% Confidence Interval of Patient Number | Hierarchy of Region in Estimate |
|--------------------------------------------------|---------------------|---------------------------------------|-------------------------|-------------------------------------------|---------------------------------|
| Global                                           | 28.09               | 10.24-71                              | 1085474.97              | 395220.4-2745154.12                       | GLOBAL                          |
| Central Europe, eastern Europe, and central Asia | 21.08               | 7.19-44.05                            | 46035.65                | 15822.43-95963.07                         | SUPER-REGION                    |
| Asia, central                                    | 14.07               | 4.22-34.89                            | 6747.86                 | 1998.77-16718.15                          | REGION                          |
| Armenia                                          | 14.07               | 4.22-34.89                            | 220.8                   | 66.22-547.53                              | Region                          |
| Azerbaijan                                       | 14.07               | 4.22-34.89                            | 713.97                  | 214.14-1770.46                            | Region                          |
| Georgia                                          | 14.07               | 4.22-34.89                            | 293.76                  | 88.11-728.45                              | Region                          |
| Kazakhstan                                       | 8.85                | 6.63-11.51                            | 856.41                  | 626-1124.05                               | Country                         |
| Kyrgyzstan                                       | 14.07               | 4.22-34.89                            | 463.87                  | 139.13-1150.28                            | Region                          |
| Mongolia                                         | 14.07               | 4.22-34.89                            | 234.02                  | 70.19-580.3                               | Region                          |
| Tajikistan                                       | 14.07               | 4.22-34.89                            | 665.78                  | 199.69-1650.96                            | Region                          |
| Turkmenistan                                     | 14.07               | 4.22-34.89                            | 430.8                   | 129.21-1068.27                            | Region                          |
| Uzbekistan                                       | 14.07               | 4.22-34.89                            | 2359.81                 | 707.77-5851.71                            | Region                          |
| Europe, central                                  | 30.45               | 8.52-82                               | 17764.42                | 4978.85-47745.45                          | REGION                          |
| Albania                                          | 30.45               | 8.52-82                               | 430.27                  | 120.39-1158.7                             | Region                          |
| Bosnia and Herzegovina                           | 30.45               | 8.52-82                               | 509.76                  | 142.63-1372.75                            | Region                          |
| Bulgaria                                         | 30.45               | 8.52-82                               | 1088.35                 | 304.52-2930.86                            | Region                          |
| Croatia                                          | 30.45               | 8.52-82                               | 647.3                   | 181.12-1743.15                            | Region                          |
| Czechia                                          | 30.45               | 8.52-82                               | 1655.31                 | 463.16-4457.64                            | Region                          |
| Hungary                                          | 36.73               | 35.94-37.57                           | 1861.22                 | 1770.95-1952.05                           | Country                         |
| Montenegro                                       | 30.45               | 8.52-82                               | 96.68                   | 27.05-260.34                              | Region                          |
| Poland                                           | 30.45               | 8.52-82                               | 5939.24                 | 1661.82-15994.02                          | Region                          |
| Romania                                          | 30.45               | 8.52-82                               | 3009.4                  | 842.04-8104.14                            | Region                          |
| Serbia                                           | 30.45               | 8.52-82                               | 1357.35                 | 379.79-3655.26                            | Region                          |
| Slovakia                                         | 30.45               | 8.52-82                               | 852.92                  | 238.65-2296.87                            | Region                          |
| Slovenia                                         | 30.45               | 8.52-82                               | 317.76                  | 88.91-855.71                              | Region                          |
| North Macedonia                                  | 30.45               | 8.52-82                               | 317.06                  | 88.71-853.82                              | Region                          |
| Europe, eastern                                  | 20.73               | 6.16-60.44                            | 18471.31                | 5533.8-45895.65                           | REGION                          |
| Belarus                                          | 20.73               | 6.16-60.44                            | 1046.78                 | 311.05-3051.97                            | Region                          |
| Estonia                                          | 45.25               | 12.4-136.67                           | 254.25                  | 68-658.05                                 | Country                         |
| Latvia                                           | 20.73               | 6.16-60.44                            | 210.7                   | 62.61-614.3                               | Region                          |
| Lithuania                                        | 39.11               | 10.87-121.24                          | 462.04                  | 122-1219.08                               | Country                         |
| Republic of Moldova                              | 20.73               | 6.16-60.44                            | 435.73                  | 129.48-1270.41                            | Region                          |
| Russia                                           | 6.27                | 1.75-19.52                            | 3952.9                  | 1054.95-10369.9                           | Country                         |
| Ukraine                                          | 10.65               | 2.78-33.24                            | 2024.01                 | 505.45-5540.52                            | Country                         |
| High income                                      | 20.95               | 8.6-37.4                              | 115214.14               | 47468.42-205672.12                        | SUPER-REGION                    |
| Asia Pacific, high income                        | 19.8                | 7.7-38.34                             | 18468.84                | 7251.05-35831.2                           | REGION                          |
| Brunei Darussalam                                | 19.8                | 7.7-38.34                             | 41.68                   | 16.21-80.7                                | Region                          |
| Japan                                            | 16.47               | 14.66-18.24                           | 10650.25                | 9492.3-11956.33                           | Country                         |
| Republic of Korea                                | 16.78               | 16.41-17.15                           | 4298.34                 | 4135.98-4446                              | Country                         |
| Singapore                                        | 19.8                | 7.7-38.34                             | 551.92                  | 214.64-1068.72                            | Region                          |
| Australasia                                      | 14.05               | 3.78-34.71                            | 2143.86                 | 546.93-5148.72                            | REGION                          |
| Australia                                        | 6.83                | 5.38-8.5                              | 874.36                  | 669-1077.08                               | Country                         |
| New Zealand                                      | 14.05               | 3.78-34.71                            | 344.44                  | 92.67-850.93                              | Region                          |
| Europe, western                                  | 37.81               | 23.99-54.87                           | 83459.81                | 52735.55-120951.85                        | REGION                          |
| Austria                                          | 37.81               | 23.99-54.87                           | 1726.31                 | 1095.33-2505.23                           | Region                          |

|                                  |        |              |           |                   |              |
|----------------------------------|--------|--------------|-----------|-------------------|--------------|
| Belgium                          | 37.81  | 23.99-54.87  | 2209.5    | 1401.9-3206.44    | Region       |
| Cyprus                           | 37.81  | 23.99-54.87  | 228.28    | 144.84-331.29     | Region       |
| Denmark                          | 39.17  | 37.65-40.59  | 1141.93   | 1058-1220.12      | Country      |
| Finland                          | 37.81  | 23.99-54.87  | 1061.51   | 673.52-1540.47    | Region       |
| France                           | 25.11  | 24.44-25.74  | 8457.7    | 8161.98-8725.02   | Country      |
| Germany                          | 18.4   | 17.94-18.87  | 7796.53   | 7529.98-8048.13   | Country      |
| Greece                           | 24.89  | 23.34-26.62  | 1322.27   | 1210.97-1431.05   | Country      |
| Iceland                          | 37.81  | 23.99-54.87  | 64.2      | 40.74-93.17       | Region       |
| Ireland                          | 37.81  | 23.99-54.87  | 939.93    | 596.37-1364.03    | Region       |
| Israel                           | 37.81  | 23.99-54.87  | 1643.46   | 1042.76-2385      | Region       |
| Italy                            | 36.97  | 32.83-41.45  | 11467.71  | 10145.8-12899.4   | Country      |
| Luxembourg                       | 37.81  | 23.99-54.87  | 116.96    | 74.21-169.73      | Region       |
| Malta                            | 25.8   | 20.94-30.9   | 56.87     | 39-77             | Country      |
| Netherlands                      | 71.22  | 55.12-89.85  | 6123.74   | 4742.67-7764.27   | Country      |
| Norway                           | 57.21  | 51.18-63.55  | 1535.6    | 1367.97-1722      | Country      |
| Portugal                         | 37.81  | 23.99-54.87  | 2030.81   | 1288.52-2947.12   | Region       |
| Spain                            | 47.22  | 42.67-51.98  | 11224.06  | 10126.42-12330.35 | Country      |
| Sweden                           | 89.87  | 88.09-91.76  | 4530.08   | 4361.95-4699      | Country      |
| Switzerland                      | 37.81  | 23.99-54.87  | 1648.36   | 1045.86-2392.1    | Region       |
| United Kingdom                   | 65.96  | 64.78-67.04  | 22648.8   | 22175.97-23167    | Country      |
| Latin America, southern          | 10.52  | 1.92-29.64   | 3646.26   | 697.75-10330.3    | REGION       |
| Argentina                        | 3.16   | 2.65-3.8     | 732.77    | 591.98-891.05     | Country      |
| Chile                            | 10.52  | 1.92-29.64   | 1019.13   | 186-2871.4        | Region       |
| Uruguay                          | 10.52  | 1.92-29.64   | 188.67    | 34.43-531.58      | Region       |
| North America, high income       | 25.52  | 9.98-52.47   | 47510.27  | 18563.02-98035.45 | REGION       |
| Canada                           | 18.09  | 17.46-18.79  | 3439.63   | 3278.92-3600.12   | Country      |
| United States of America         | 34.14  | 33.16-35.18  | 57059.31  | 55381.7-58848.33  | Country      |
| Latin America and Caribbean      | 45.2   | 16.48-108.12 | 134119.36 | 49125.4-321154.37 | SUPER-REGION |
| Caribbean                        | 57.72  | 15.08-156.32 | 17279.08  | 6790.73-37080.22  | REGION       |
| Antigua and Barbuda              | 57.72  | 15.08-156.32 | 29.24     | 7.64-79.19        | Region       |
| Bahamas                          | 57.72  | 15.08-156.32 | 116.68    | 30.48-316         | Region       |
| Barbados                         | 101.95 | 21.61-243.65 | 186.6     | 160-213.02        | Country      |
| Belize                           | 57.72  | 15.08-156.32 | 115.36    | 30.14-312.41      | Region       |
| Cuba                             | 95.34  | 16.6-270.75  | 6904.21   | 2663.6-14131.27   | Country      |
| Dominican Republic               | 57.72  | 15.08-156.32 | 3133.18   | 818.58-8485.43    | Region       |
| Grenada                          | 57.72  | 15.08-156.32 | 32.24     | 8.42-87.31        | Region       |
| Guyana                           | 57.72  | 15.08-156.32 | 225.65    | 58.95-611.11      | Region       |
| Haiti                            | 57.72  | 15.08-156.32 | 3333.82   | 871-9028.81       | Region       |
| Jamaica                          | 57.72  | 15.08-156.32 | 860.86    | 224.91-2331.43    | Region       |
| Puerto Rico                      | 68.88  | 14.76-167.48 | 1281.18   | 1173.97-1395.05   | Country      |
| Saint Lucia                      | 57.72  | 15.08-156.32 | 53.79     | 14.05-145.69      | Region       |
| Saint Vincent and the Grenadines | 57.72  | 15.08-156.32 | 31.59     | 8.25-85.55        | Region       |
| Suriname                         | 57.72  | 15.08-156.32 | 168.42    | 44-456.13         | Region       |
| Trinidad and Tobago              | 57.72  | 15.08-156.32 | 408.94    | 106.84-1107.5     | Region       |
| Virgin Island (US)               | 57.72  | 15.08-156.32 | 31.64     | 8.27-85.68        | Region       |
| Latin America, Andean            | 47.75  | 10.17-126.71 | 14908.89  | 3217.58-39671.88  | REGION       |
| Bolivia                          | 47.75  | 10.17-126.71 | 2776.17   | 591.28-7366.88    | Region       |
| Ecuador                          | 43.5   | 13.42-96.82  | 3837.5    | 1174-8588.25      | Country      |
| Peru                             | 47.75  | 10.17-126.71 | 7922.75   | 1687.42-21023.91  | Region       |
| Latin America, central           | 35.46  | 15.02-68.09  | 46716.16  | 19882.2-89915.78  | REGION       |
| Colombia                         | 10.4   | 10.08-10.71  | 2694.8    | 2560.98-2828.02   | Country      |
| Costa Rica                       | 35.46  | 15.02-68.09  | 903.74    | 382.8-1735.35     | Region       |
| El Salvador                      | 35.46  | 15.02-68.09  | 1223.23   | 518.13-2348.83    | Region       |
| Guatemala                        | 35.46  | 15.02-68.09  | 3222.65   | 1365.04-6188.11   | Region       |
| Honduras                         | 35.46  | 15.02-68.09  | 1757.18   | 744.3-3374.12     | Region       |
| Mexico                           | 71.03  | 41.11-106.95 | 46779.97  | 26990.38-70260.35 | Country      |

|                                         |        |               |           |                     |              |
|-----------------------------------------|--------|---------------|-----------|---------------------|--------------|
| Nicaragua                               | 35.46  | 15.02-68.09   | 1191.24   | 504.58-2287.41      | Region       |
| Panama                                  | 35.46  | 15.02-68.09   | 763.9     | 323.57-1466.83      | Region       |
| Venezuela (Bolivarian Republic of)      | 45.4   | 14.16-101.21  | 6560.13   | 2023.45-14566.17    | Country      |
| Latin America, tropical                 | 69.98  | 16.93-199.53  | 78114.39  | 18838.6-222340.02   | REGION       |
| Brazil                                  | 93.15  | 22.22-221.68  | 100698.81 | 23900.05-239781.35  | Country      |
| Paraguay                                | 69.98  | 16.93-199.53  | 2454.87   | 593.9-6999.42       | Region       |
| North Africa and Middle East            | 38.26  | 9.78-96.6     | 115633.15 | 29694.35-291901.55  | SUPER-REGION |
| North Africa and the Middle East        | 44.13  | 19.94-80.54   | 133374.75 | 60416.15-243592.2   | REGION       |
| Afghanistan                             | 44.13  | 19.94-80.54   | 8363.54   | 3779.04-15263.98    | Region       |
| Algeria                                 | 44.13  | 19.94-80.54   | 9574.79   | 4326.34-17474.59    | Region       |
| Bahrain                                 | 44.13  | 19.94-80.54   | 265.27    | 119.86-484.13       | Region       |
| Egypt                                   | 44.13  | 19.94-80.54   | 22343.35  | 10095.77-40778.01   | Region       |
| Iran (Islamic Republic of)              | 46.74  | 29.91-66.71   | 19441.62  | 12419.67-28088.23   | Country      |
| Iraq                                    | 44.13  | 19.94-80.54   | 8766.25   | 3961-15998.95       | Region       |
| Jordan                                  | 44.13  | 19.94-80.54   | 2222.89   | 1004.41-4056.91     | Region       |
| Kuwait                                  | 44.13  | 19.94-80.54   | 730.84    | 330.23-1333.84      | Region       |
| Lebanon                                 | 44.13  | 19.94-80.54   | 1495.82   | 675.88-2729.96      | Region       |
| Libya                                   | 44.13  | 19.94-80.54   | 1501.53   | 678.46-2740.39      | Region       |
| Morocco                                 | 44.13  | 19.94-80.54   | 8205.37   | 3707.57-14975.3     | Region       |
| Palestine                               | 44.13  | 19.94-80.54   | 1109.62   | 501.38-2025.13      | Region       |
| Oman                                    | 44.13  | 19.94-80.54   | 766.18    | 346.2-1398.33       | Region       |
| Qatar                                   | 44.13  | 19.94-80.54   | 315.91    | 142.74-576.56       | Region       |
| Saudi Arabia                            | 34.46  | 10.88-77.09   | 5062.11   | 1579.85-11181.4     | Country      |
| Sudan                                   | 44.13  | 19.94-80.54   | 9682.92   | 4375.2-17671.93     | Region       |
| Syrian Arab Republic                    | 44.13  | 19.94-80.54   | 3857.17   | 1742.85-7039.57     | Region       |
| Sudan                                   | 44.13  | 19.94-80.54   | 9682.92   | 4375.2-17671.93     | Region       |
| Tunisia                                 | 44.13  | 19.94-80.54   | 2629.12   | 1187.96-4798.31     | Region       |
| Turkey                                  | 31.82  | 29.39-34.35   | 13589.35  | 12537.88-14659.05   | Country      |
| United Arab Emirates                    | 146.76 | 122.46-174.58 | 4483.72   | 3716.92-5348.02     | Country      |
| Yemen                                   | 44.13  | 19.94-80.54   | 6531.65   | 2951.31-11920.67    | Region       |
| South Asia                              | 16.9   | 2.73-46.56    | 146639.21 | 23568.55-403639.35  | SUPER-REGION |
| Asia, south                             | 10.42  | 2.13-30.33    | 90402.05  | 18567.38-262453.42  | REGION       |
| Bangladesh                              | 10.42  | 2.13-30.33    | 8484.64   | 1734.38-24696.64    | Region       |
| Bhutan                                  | 10.42  | 2.13-30.33    | 37.67     | 7.7-109.64          | Region       |
| India                                   | 4.92   | 2.36-8.64     | 32602.28  | 15690.6-57022.95    | Country      |
| Nepal                                   | 10.42  | 2.13-30.33    | 1645.14   | 336.29-4788.59      | Region       |
| Pakistan                                | 10.42  | 2.13-30.33    | 11172.33  | 2283.79-32519.84    | Region       |
| South East Asia, east Asia, and Oceania | 34.51  | 8.1-112.55    | 372724.48 | 87980.83-1216452.6  | SUPER-REGION |
| Asia, east                              | 36.69  | 9.1-108.09    | 268020.11 | 66306.82-790138.42  | REGION       |
| China                                   | 30.96  | 30.23-31.68   | 222095.56 | 216963.62-227463.28 | Country      |
| Dem. People's Republic of Korea         | 36.69  | 9.1-108.09    | 4832.14   | 1198.49-14235.66    | Region       |
| Asia, South East                        | 34.51  | 8.1-112.55    | 372724.48 | 87980.83-1216452.6  | REGION       |
| Cambodia                                | 34.51  | 8.1-112.55    | 2952.85   | 693.08-9630.36      | Super-region |
| Indonesia                               | 34.51  | 8.1-112.55    | 46866.16  | 11000.17-152848.04  | Super-region |
| Lao People's Democratic Republic        | 34.51  | 8.1-112.55    | 1250.56   | 293.52-4078.53      | Super-region |
| Malaysia                                | 34.51  | 8.1-112.55    | 5430.13   | 1274.53-17709.69    | Super-region |
| Maldives                                | 34.51  | 8.1-112.55    | 68.19     | 16.01-222.41        | Super-region |
| Mauritius                               | 34.51  | 8.1-112.55    | 222.31    | 52.18-725.03        | Super-region |
| Myanmar                                 | 34.51  | 8.1-112.55    | 9728.17   | 2283.34-31727.2     | Super-region |
| Philippines                             | 34.51  | 8.1-112.55    | 18825.44  | 4418.61-61396.79    | Super-region |
| Seychelles                              | 34.51  | 8.1-112.55    | 16.53     | 3.88-53.91          | Super-region |
| Sri Lanka                               | 34.51  | 8.1-112.55    | 3846.38   | 902.8-12544.49      | Super-region |
| Thailand                                | 34.51  | 8.1-112.55    | 12364.2   | 2902.06-40324.26    | Super-region |
| Timor-Leste                             | 34.51  | 8.1-112.55    | 225.07    | 52.83-734.05        | Super-region |

|                                  |       |            |            |                     |              |
|----------------------------------|-------|------------|------------|---------------------|--------------|
| Vietnam                          | 34.51 | 8.1-112.55 | 16814.05   | 3946.5-54836.89     | Super-region |
| Oceania                          | 34.51 | 8.1-112.55 | 372724.48  | 87980.83-1216452.6  | REGION       |
| Fiji                             | 34.51 | 8.1-112.55 | 152.68     | 35.84-497.95        | Super-region |
| Guam                             | 34.51 | 8.1-112.55 | 28.86      | 6.77-94.13          | Super-region |
| Kiribati                         | 34.51 | 8.1-112.55 | 20.95      | 4.92-68.32          | Super-region |
| Marshall Islands                 | 34.51 | 8.1-112.55 | 9.4        | 2.21-30.66          | Super-region |
| Micronesia (Fed. States of)      | 34.51 | 8.1-112.55 | 19.51      | 4.58-63.64          | Super-region |
| Papua New Guinea                 | 34.51 | 8.1-112.55 | 1511.18    | 354.7-4928.51       | Super-region |
| Samoa                            | 34.51 | 8.1-112.55 | 33.03      | 7.75-107.72         | Super-region |
| Solomon Islands                  | 34.51 | 8.1-112.55 | 116.51     | 27.35-379.98        | Super-region |
| Tonga                            | 34.51 | 8.1-112.55 | 18.22      | 4.28-59.42          | Super-region |
| Vanuatu                          | 34.51 | 8.1-112.55 | 52.27      | 12.27-170.47        | Super-region |
| Sub-Saharan Africa               | 28.09 | 10.24-71   | 1085474.97 | 395220.4-2745154.12 | SUPER-REGION |
| Sub-Saharan Africa, central      | 28.09 | 10.24-71   | 1085474.97 | 395220.4-2745154.12 | REGION       |
| Angola                           | 28.09 | 10.24-71   | 4664.45    | 1700.39-11789.81    | Global       |
| Central African Republic         | 28.09 | 10.24-71   | 684.19     | 249.42-1729.36      | Global       |
| Congo                            | 28.09 | 10.24-71   | 775.68     | 282.77-1960.6       | Global       |
| Democratic Republic of the Congo | 28.09 | 10.24-71   | 12598.67   | 4592.75-31844.28    | Global       |
| Equatorial Guinea                | 28.09 | 10.24-71   | 174.89     | 63.75-442.05        | Global       |
| Gabon                            | 28.09 | 10.24-71   | 306.99     | 111.91-775.94       | Global       |
| Sub-Saharan Africa, eastern      | 28.09 | 10.24-71   | 1085474.97 | 395220.4-2745154.12 | REGION       |
| Burundi                          | 28.09 | 10.24-71   | 1682.84    | 613.47-4253.54      | Global       |
| Comoros                          | 28.09 | 10.24-71   | 121.05     | 44.13-305.97        | Global       |
| Djibouti                         | 28.09 | 10.24-71   | 131.74     | 48.03-332.99        | Global       |
| Eritrea                          | 28.09 | 10.24-71   | 496.87     | 181.13-1255.89      | Global       |
| Ethiopia                         | 28.09 | 10.24-71   | 16136.72   | 5882.52-40787       | Global       |
| Kenya                            | 28.09 | 10.24-71   | 7599.12    | 2770.2-19207.46     | Global       |
| Madagascar                       | 28.09 | 10.24-71   | 3897.86    | 1420.94-9852.2      | Global       |
| Malawi                           | 28.09 | 10.24-71   | 2723.58    | 992.86-6884.1       | Global       |
| Mozambique                       | 28.09 | 10.24-71   | 4513.27    | 1645.28-11407.71    | Global       |
| Rwanda                           | 28.09 | 10.24-71   | 1849.66    | 674.28-4675.19      | Global       |
| Somalia                          | 28.09 | 10.24-71   | 2238.52    | 816.04-5658.07      | Global       |
| South Sudan                      | 28.09 | 10.24-71   | 1570.43    | 572.49-3969.4       | Global       |
| Uganda                           | 28.09 | 10.24-71   | 6515.31    | 2375.11-16468.03    | Global       |
| United Republic of Tanzania      | 28.09 | 10.24-71   | 8394.16    | 3060.03-21217       | Global       |
| Zambia                           | 28.09 | 10.24-71   | 2607.02    | 950.37-6589.47      | Global       |
| Sub-Saharan Africa, southern     | 28.09 | 10.24-71   | 1085474.97 | 395220.4-2745154.12 | REGION       |
| Botswana                         | 28.09 | 10.24-71   | 340.6      | 124.16-860.89       | Global       |
| Lesotho                          | 28.09 | 10.24-71   | 304.86     | 111.13-770.56       | Global       |
| Namibia                          | 28.09 | 10.24-71   | 367.76     | 134.07-929.55       | Global       |
| South Africa                     | 28.09 | 10.24-71   | 8453.02    | 3081.49-21365.77    | Global       |
| Eswatini                         | 28.09 | 10.24-71   | 165.71     | 60.41-418.85        | Global       |
| Zimbabwe                         | 28.09 | 10.24-71   | 2182.85    | 795.74-5517.34      | Global       |
| Sub-Saharan Africa, western      | 28.09 | 10.24-71   | 1085474.97 | 395220.4-2745154.12 | REGION       |
| Benin                            | 28.09 | 10.24-71   | 1704.76    | 621.46-4308.93      | Global       |
| Burkina Faso                     | 28.09 | 10.24-71   | 2937.81    | 1070.96-7425.58     | Global       |
| Cote d'Ivoire                    | 28.09 | 10.24-71   | 3673.58    | 1339.18-9285.3      | Global       |
| Cameroon                         | 28.09 | 10.24-71   | 3727.2     | 1358.72-9420.84     | Global       |
| Cabo Verde                       | 28.09 | 10.24-71   | 77.77      | 28.35-196.58        | Global       |
| Chad                             | 28.09 | 10.24-71   | 2310.59    | 842.31-5840.22      | Global       |
| Gambia                           | 28.09 | 10.24-71   | 342.17     | 124.74-864.87       | Global       |
| Ghana                            | 28.09 | 10.24-71   | 4304.21    | 1569.07-10879.28    | Global       |
| Guinea                           | 28.09 | 10.24-71   | 1904.38    | 694.23-4813.48      | Global       |
| Guinea-Bissau                    | 28.09 | 10.24-71   | 282.39     | 102.94-713.77       | Global       |

|                       |       |          |          |                 |        |
|-----------------------|-------|----------|----------|-----------------|--------|
| Liberia               | 28.09 | 10.24-71 | 706.5    | 257.55-1785.75  | Global |
| Mali                  | 28.09 | 10.24-71 | 2838.68  | 1034.82-7175.02 | Global |
| Mauritania            | 28.09 | 10.24-71 | 650.19   | 237.02-1643.42  | Global |
| Niger                 | 28.09 | 10.24-71 | 3381.04  | 1232.53-8545.89 | Global |
| Nigeria               | 28.09 | 10.24-71 | 28559.08 | 10411-72185.65  | Global |
| Sao Tome and Principe | 28.09 | 10.24-71 | 30.75    | 11.21-77.73     | Global |
| Senegal               | 28.09 | 10.24-71 | 2408.2   | 877.89-6086.93  | Global |
| Sierra Leone          | 28.09 | 10.24-71 | 1122.4   | 409.16-2836.97  | Global |
| Togo                  | 28.09 | 10.24-71 | 1168.36  | 425.92-2953.13  | Global |

**Table S28. Estimated point prevalence of SLE diagnosed by physician/ dermatologist for female adults.**

| Country/Region/Super-region                      | Expected Prevalence | 95% Confidence Interval of Prevalence | Expected Patient Number | 95% Confidence Interval of Patient Number | Hierarchy of Region in Estimate |
|--------------------------------------------------|---------------------|---------------------------------------|-------------------------|-------------------------------------------|---------------------------------|
| Global                                           | 38.81               | 14.13-97.87                           | 1012437.7               | 368725.63-2554470.8                       | GLOBAL                          |
| Central Europe, eastern Europe, and central Asia | 26.26               | 8.96-54.86                            | 44044.31                | 15189.42-91757                            | SUPER-REGION                    |
| Asia, central                                    | 19.94               | 5.97-49.43                            | 6253.43                 | 1858.72-15551.65                          | REGION                          |
| Armenia                                          | 19.94               | 5.97-49.43                            | 239.31                  | 71.65-593.24                              | Region                          |
| Azerbaijan                                       | 19.94               | 5.97-49.43                            | 730.76                  | 218.79-1811.51                            | Region                          |
| Georgia                                          | 19.94               | 5.97-49.43                            | 318.73                  | 95.43-790.12                              | Region                          |
| Kazakhstan                                       | 12.32               | 9.22-16                               | 797.32                  | 584.95-1049.02                            | Country                         |
| Kyrgyzstan                                       | 19.94               | 5.97-49.43                            | 401.23                  | 120.13-994.62                             | Region                          |
| Mongolia                                         | 19.94               | 5.97-49.43                            | 209.66                  | 62.77-519.73                              | Region                          |
| Tajikistan                                       | 19.94               | 5.97-49.43                            | 520.11                  | 155.72-1289.31                            | Region                          |
| Turkmenistan                                     | 19.94               | 5.97-49.43                            | 380.16                  | 113.82-942.39                             | Region                          |
| Uzbekistan                                       | 19.94               | 5.97-49.43                            | 2162.48                 | 647.44-5360.66                            | Region                          |
| Europe, central                                  | 36.38               | 10.17-97.99                           | 17156.38                | 4798.9-46161.85                           | REGION                          |
| Albania                                          | 36.38               | 10.17-97.99                           | 394.69                  | 110.34-1063.1                             | Region                          |
| Bosnia and Herzegovina                           | 36.38               | 10.17-97.99                           | 495.32                  | 138.47-1334.15                            | Region                          |
| Bulgaria                                         | 36.38               | 10.17-97.99                           | 1064.45                 | 297.57-2867.11                            | Region                          |
| Croatia                                          | 36.38               | 10.17-97.99                           | 633.16                  | 177-1705.43                               | Region                          |
| Czechia                                          | 36.38               | 10.17-97.99                           | 1592.6                  | 445.21-4289.68                            | Region                          |
| Hungary                                          | 43.39               | 42.45-44.4                            | 1801.76                 | 1715-1889.02                              | Country                         |
| Montenegro                                       | 36.38               | 10.17-97.99                           | 88.97                   | 24.87-239.63                              | Region                          |
| Poland                                           | 36.38               | 10.17-97.99                           | 5764.33                 | 1611.41-15526.29                          | Region                          |
| Romania                                          | 36.38               | 10.17-97.99                           | 2891.62                 | 808.35-7788.61                            | Region                          |
| Serbia                                           | 36.38               | 10.17-97.99                           | 1295.54                 | 362.17-3489.56                            | Region                          |
| Slovakia                                         | 36.38               | 10.17-97.99                           | 821.52                  | 229.65-2212.77                            | Region                          |
| Slovenia                                         | 36.38               | 10.17-97.99                           | 307.86                  | 86.06-829.22                              | Region                          |
| North Macedonia                                  | 36.38               | 10.17-97.99                           | 297.66                  | 83.21-801.76                              | Region                          |
| Europe, eastern                                  | 25.08               | 7.46-73.17                            | 17788.41                | 5299.8-44181.03                           | REGION                          |
| Belarus                                          | 25.08               | 7.46-73.17                            | 1012.76                 | 301.24-2954.68                            | Region                          |
| Estonia                                          | 54.27               | 14.87-163.83                          | 245.24                  | 65.95-631.1                               | Country                         |
| Latvia                                           | 25.08               | 7.46-73.17                            | 206.78                  | 61.5-603.26                               | Region                          |
| Lithuania                                        | 46.21               | 12.84-143.21                          | 447.29                  | 118-1185                                  | Country                         |
| Republic of Moldova                              | 25.08               | 7.46-73.17                            | 424.57                  | 126.29-1238.67                            | Region                          |
| Russia                                           | 7.64                | 2.13-23.78                            | 3800.27                 | 1015.98-9982.67                           | Country                         |
| Ukraine                                          | 12.65               | 3.3-39.47                             | 1957.28                 | 494.35-5343.02                            | Country                         |
| High income                                      | 25.59               | 10.52-45.71                           | 110712.76               | 45624.45-197654.88                        | SUPER-REGION                    |
| Asia Pacific, high income                        | 23.01               | 8.94-44.56                            | 17942.44                | 7023.32-34773.6                           | REGION                          |
| Brunei Darussalam                                | 23.01               | 8.94-44.56                            | 33.76                   | 13.12-65.38                               | Region                          |
| Japan                                            | 19.09               | 17.01-21.14                           | 10351.7                 | 9221.77-11624.3                           | Country                         |
| Republic of Korea                                | 19.59               | 19.15-20.03                           | 4172                    | 4016.98-4315.03                           | Country                         |
| Singapore                                        | 23.01               | 8.94-44.56                            | 531.62                  | 206.55-1029.51                            | Region                          |
| Australasia                                      | 17.76               | 4.77-43.87                            | 2044.49                 | 523.9-4913.05                             | REGION                          |
| Australia                                        | 8.62                | 6.8-10.73                             | 833.93                  | 639.95-1032.02                            | Country                         |



|                                         |        |               |           |                    |              |
|-----------------------------------------|--------|---------------|-----------|--------------------|--------------|
| <b>New Zealand</b>                      | 17.76  | 4.77-43.87    | 328       | 88.1-810.22        | Region       |
| <b>Europe, western</b>                  | 45.6   | 28.93-66.19   | 80429.5   | 50765.25-116644.35 | REGION       |
| <b>Austria</b>                          | 45.6   | 28.93-66.19   | 1695.42   | 1075.63-2460.96    | Region       |
| <b>Belgium</b>                          | 45.6   | 28.93-66.19   | 2086.41   | 1323.68-3028.5     | Region       |
| <b>Cyprus</b>                           | 45.6   | 28.93-66.19   | 214.88    | 136.32-311.9       | Region       |
| <b>Denmark</b>                          | 47.92  | 46.05-49.64   | 1096.96   | 1018-1172          | Country      |
| <b>Finland</b>                          | 45.6   | 28.93-66.19   | 1018.59   | 646.22-1478.51     | Region       |
| <b>France</b>                           | 31.01  | 30.18-31.8    | 8107.93   | 7822.98-8373.05    | Country      |
| <b>Germany</b>                          | 21.73  | 21.17-22.28   | 7548.64   | 7282.98-7797.08    | Country      |
| <b>Greece</b>                           | 29.34  | 27.49-31.37   | 1280.71   | 1173.92-1390.03    | Country      |
| <b>Iceland</b>                          | 45.6   | 28.93-66.19   | 57.85     | 36.7-83.98         | Region       |
| <b>Ireland</b>                          | 45.6   | 28.93-66.19   | 835.21    | 529.88-1212.33     | Region       |
| <b>Israel</b>                           | 45.6   | 28.93-66.19   | 1299.33   | 824.33-1886.02     | Region       |
| <b>Italy</b>                            | 43.12  | 38.28-48.34   | 11131.93  | 9848.9-12536.15    | Country      |
| <b>Luxembourg</b>                       | 45.6   | 28.93-66.19   | 111.72    | 70.88-162.17       | Region       |
| <b>Malta</b>                            | 30.62  | 24.84-36.64   | 54.96     | 38.98-73           | Country      |
| <b>Netherlands</b>                      | 86.69  | 67.06-109.4   | 5889.68   | 4556.92-7474.22    | Country      |
| <b>Norway</b>                           | 71     | 63.53-78.86   | 1470.33   | 1310-1652          | Country      |
| <b>Portugal</b>                         | 45.6   | 28.93-66.19   | 2036.74   | 1292.17-2956.41    | Region       |
| <b>Spain</b>                            | 55.91  | 50.53-61.53   | 10860.2   | 9784.65-11929.42   | Country      |
| <b>Sweden</b>                           | 111.04 | 108.88-113.39 | 4341.88   | 4180-4509          | Country      |
| <b>Switzerland</b>                      | 45.6   | 28.93-66.19   | 1605.25   | 1018.42-2330.07    | Region       |
| <b>United Kingdom</b>                   | 81.42  | 79.97-82.8    | 21713.22  | 21240.77-22219.25  | Country      |
| <b>Latin America, southern</b>          | 13.97  | 2.55-39.35    | 3436.51   | 660.75-9699.62     | REGION       |
| <b>Argentina</b>                        | 4.29   | 3.59-5.16     | 686.95    | 554.88-835.2       | Country      |
| <b>Chile</b>                            | 13.97  | 2.55-39.35    | 1015.55   | 185.37-2860.56     | Region       |
| <b>Uruguay</b>                          | 13.97  | 2.55-39.35    | 185.5     | 33.86-522.52       | Region       |
| <b>North America, high income</b>       | 31.95  | 12.51-65.67   | 45403.9   | 17742.08-93761.15  | REGION       |
| <b>Canada</b>                           | 21.89  | 21.11-22.74   | 3312.67   | 3150-3469.02       | Country      |
| <b>United States of America</b>         | 42.9   | 41.66-44.24   | 54480.79  | 52834.5-56230.32   | Country      |
| <b>Latin America and Caribbean</b>      | 61.51  | 22.4-146.87   | 125586.79 | 45973.12-300008.42 | SUPER-REGION |
| <b>Caribbean</b>                        | 78.69  | 20.51-213.14  | 16172.32  | 6353.3-34696.4     | REGION       |
| <b>Antigua and Barbuda</b>              | 78.69  | 20.51-213.14  | 28.81     | 7.51-78.04         | Region       |
| <b>Bahamas</b>                          | 78.69  | 20.51-213.14  | 113.38    | 29.55-307.1        | Region       |
| <b>Barbados</b>                         | 125.67 | 26.61-300.47  | 178.84    | 154-205.02         | Country      |
| <b>Belize</b>                           | 78.69  | 20.51-213.14  | 96.68     | 25.2-261.86        | Region       |
| <b>Cuba</b>                             | 115.87 | 20.18-329.32  | 6642.04   | 2564.95-13610.27   | Country      |
| <b>Dominican Republic</b>               | 78.69  | 20.51-213.14  | 2754.05   | 717.82-7459.63     | Region       |
| <b>Grenada</b>                          | 78.69  | 20.51-213.14  | 30.79     | 8.03-83.4          | Region       |
| <b>Guyana</b>                           | 78.69  | 20.51-213.14  | 194.69    | 50.74-527.33       | Region       |
| <b>Haiti</b>                            | 78.69  | 20.51-213.14  | 2665.72   | 694.8-7220.38      | Region       |
| <b>Jamaica</b>                          | 78.69  | 20.51-213.14  | 814.32    | 212.25-2205.67     | Region       |
| <b>Puerto Rico</b>                      | 83.2   | 17.84-202.19  | 1234.39   | 1135.97-1349       | Country      |
| <b>Saint Lucia</b>                      | 78.69  | 20.51-213.14  | 55.37     | 14.43-149.98       | Region       |
| <b>Saint Vincent and the Grenadines</b> | 78.69  | 20.51-213.14  | 30.13     | 7.85-81.6          | Region       |
| <b>Suriname</b>                         | 78.69  | 20.51-213.14  | 151.11    | 39.39-409.3        | Region       |
| <b>Trinidad and Tobago</b>              | 78.69  | 20.51-213.14  | 413.96    | 107.9-1121.25      | Region       |
| <b>Virgin Island (US)</b>               | 78.69  | 20.51-213.14  | 32.78     | 8.55-88.8          | Region       |
| <b>Latin America, Andean</b>            | 67.44  | 14.37-178.76  | 13825.64  | 2985.83-36805.75   | REGION       |
| <b>Bolivia</b>                          | 67.44  | 14.37-178.76  | 2382.22   | 507.6-6314.44      | Region       |
| <b>Ecuador</b>                          | 62.3   | 19.21-138.74  | 3545.83   | 1081.88-7940.45    | Country      |
| <b>Peru</b>                             | 67.44  | 14.37-178.76  | 7606.4    | 1620.76-20161.91   | Region       |
| <b>Latin America, central</b>           | 49.55  | 20.95-95.14   | 43443.69  | 18472.4-83723.75   | REGION       |
| <b>Colombia</b>                         | 13.86  | 13.42-14.28   | 2537.49   | 2408.98-2662.02    | Country      |
| <b>Costa Rica</b>                       | 49.55  | 20.95-95.14   | 918.05    | 388.16-1762.73     | Region       |
| <b>El Salvador</b>                      | 49.55  | 20.95-95.14   | 1146.89   | 484.91-2202.13     | Region       |

|                                         |        |               |           |                     |              |
|-----------------------------------------|--------|---------------|-----------|---------------------|--------------|
| Guatemala                               | 49.55  | 20.95-95.14   | 2582.69   | 1091.97-4958.97     | Region       |
| Honduras                                | 49.55  | 20.95-95.14   | 1468.31   | 620.81-2819.28      | Region       |
| Mexico                                  | 98.85  | 57.22-149.08  | 43552.38  | 25077.12-65572.85   | Country      |
| Nicaragua                               | 49.55  | 20.95-95.14   | 1048.9    | 443.48-2013.97      | Region       |
| Panama                                  | 49.55  | 20.95-95.14   | 703.44    | 297.42-1350.66      | Region       |
| Venezuela (Bolivarian Republic of)      | 64.43  | 20.1-143.52   | 6075.43   | 1872.78-13536.65    | Country      |
| Latin America, tropical                 | 91.44  | 22.13-260.81  | 73887.79  | 17848.3-210266.25   | REGION       |
| Brazil                                  | 121.26 | 28.95-288.04  | 95334.98  | 22645.03-226671.92  | Country      |
| Paraguay                                | 91.44  | 22.13-260.81  | 1991.76   | 482.04-5681.01      | Region       |
| North Africa and Middle East            | 57.24  | 14.68-144.47  | 105498.18 | 27175.68-266100.42  | SUPER-REGION |
| North Africa and the Middle East        | 66.03  | 29.81-120.47  | 121710.79 | 55035.02-222577.85  | REGION       |
| Afghanistan                             | 66.03  | 29.81-120.47  | 5779.87   | 2609.39-10545.22    | Region       |
| Algeria                                 | 66.03  | 29.81-120.47  | 9021.03   | 4072.65-16458.64    | Region       |
| Bahrain                                 | 66.03  | 29.81-120.47  | 269.99    | 121.89-492.6        | Region       |
| Egypt                                   | 66.03  | 29.81-120.47  | 19519.74  | 8812.41-35613.26    | Region       |
| Iran (Islamic Republic of)              | 63.34  | 40.44-90.34   | 18224.54  | 11567.65-26293.72   | Country      |
| Iraq                                    | 66.03  | 29.81-120.47  | 6912.65   | 3120.79-12611.95    | Region       |
| Jordan                                  | 66.03  | 29.81-120.47  | 1899.97   | 857.76-3466.44      | Region       |
| Kuwait                                  | 66.03  | 29.81-120.47  | 746.55    | 337.04-1362.06      | Region       |
| Lebanon                                 | 66.03  | 29.81-120.47  | 1507.62   | 680.63-2750.61      | Region       |
| Libya                                   | 66.03  | 29.81-120.47  | 1452.12   | 655.57-2649.35      | Region       |
| Morocco                                 | 66.03  | 29.81-120.47  | 8143.07   | 3676.28-14856.82    | Region       |
| Palestine                               | 66.03  | 29.81-120.47  | 860.8     | 388.62-1570.51      | Region       |
| Oman                                    | 66.03  | 29.81-120.47  | 697.58    | 314.93-1272.71      | Region       |
| Qatar                                   | 66.03  | 29.81-120.47  | 314.9     | 142.17-574.53       | Region       |
| Saudi Arabia                            | 49.82  | 15.75-111.54  | 4665.23   | 1448.55-10312.3     | Country      |
| Sudan                                   | 66.03  | 29.81-120.47  | 7240.14   | 3268.64-13209.44    | Region       |
| Syrian Arab Republic                    | 66.03  | 29.81-120.47  | 3519.21   | 1588.79-6420.71     | Region       |
| Sudan                                   | 66.03  | 29.81-120.47  | 7240.14   | 3268.64-13209.44    | Region       |
| Tunisia                                 | 66.03  | 29.81-120.47  | 2765.07   | 1248.32-5044.79     | Region       |
| Turkey                                  | 43.17  | 39.83-46.65   | 12735.69  | 11736.98-13769.3    | Country      |
| United Arab Emirates                    | 196.29 | 163.93-233.53 | 4216.81   | 3507.85-5023.1      | Country      |
| Yemen                                   | 66.03  | 29.81-120.47  | 4986.05   | 2251.01-9096.91     | Region       |
| South Asia                              | 24.4   | 3.95-67.11    | 135176.85 | 21754.48-371130.92  | SUPER-REGION |
| Asia, south                             | 15.04  | 3.08-43.85    | 83336.94  | 17036.75-242491.12  | REGION       |
| Bangladesh                              | 15.04  | 3.08-43.85    | 7859.8    | 1609.59-22915.7     | Region       |
| Bhutan                                  | 15.04  | 3.08-43.85    | 35.02     | 7.17-102.09         | Region       |
| India                                   | 6.99   | 3.35-12.26    | 30185.4   | 14529.65-52785.67   | Country      |
| Nepal                                   | 15.04  | 3.08-43.85    | 1512.38   | 309.72-4409.42      | Region       |
| Pakistan                                | 15.04  | 3.08-43.85    | 8973.41   | 1837.64-26162.51    | Region       |
| South East Asia, east Asia, and Oceania | 44.15  | 10.36-143.77  | 354384.13 | 83627.15-1155742.3  | SUPER-REGION |
| Asia, east                              | 45.29  | 11.23-133.46  | 256960.41 | 63593.8-757957.87   | REGION       |
| China                                   | 38.19  | 37.26-39.09   | 212961.96 | 207882.18-218098.15 | Country      |
| Dem. People's Republic of Korea         | 45.29  | 11.23-133.46  | 4416.77   | 1095.17-13015.29    | Region       |
| Asia, South East                        | 44.15  | 10.36-143.77  | 354384.13 | 83627.15-1155742.3  | REGION       |
| Cambodia                                | 44.15  | 10.36-143.77  | 2339.15   | 548.89-7617.22      | Super-region |
| Indonesia                               | 44.15  | 10.36-143.77  | 39676.31  | 9310.23-129201.88   | Super-region |
| Lao People's Democratic Republic        | 44.15  | 10.36-143.77  | 941.85    | 221.01-3067.04      | Super-region |
| Malaysia                                | 44.15  | 10.36-143.77  | 4749.97   | 1114.6-15467.79     | Super-region |
| Maldives                                | 44.15  | 10.36-143.77  | 58.96     | 13.83-191.99        | Super-region |
| Mauritius                               | 44.15  | 10.36-143.77  | 217.7     | 51.09-708.93        | Super-region |
| Myanmar                                 | 44.15  | 10.36-143.77  | 8288.32   | 1944.89-26990.07    | Super-region |
| Philippines                             | 44.15  | 10.36-143.77  | 14767.87  | 3465.35-48090.07    | Super-region |
| Seychelles                              | 44.15  | 10.36-143.77  | 14.74     | 3.46-47.99          | Super-region |

|                                         |       |              |           |                     |              |
|-----------------------------------------|-------|--------------|-----------|---------------------|--------------|
| <b>Sri Lanka</b>                        | 44.15 | 10.36-143.77 | 3445.91   | 808.6-11221.27      | Super-region |
| <b>Thailand</b>                         | 44.15 | 10.36-143.77 | 12399.48  | 2909.59-40377.64    | Super-region |
| <b>Timor-Leste</b>                      | 44.15 | 10.36-143.77 | 149.32    | 35.04-486.25        | Super-region |
| <b>Vietnam</b>                          | 44.15 | 10.36-143.77 | 15414.14  | 3617-50194.58       | Super-region |
| <b>Oceania</b>                          | 44.15 | 10.36-143.77 | 354384.13 | 83627.15-1155742.3  | REGION       |
| <b>Fiji</b>                             | 44.15 | 10.36-143.77 | 123.15    | 28.9-401.04         | Super-region |
| <b>Guam</b>                             | 44.15 | 10.36-143.77 | 25.3      | 5.94-82.38          | Super-region |
| <b>Kiribati</b>                         | 44.15 | 10.36-143.77 | 15.4      | 3.61-50.14          | Super-region |
| <b>Marshall Islands</b>                 | 44.15 | 10.36-143.77 | 6.03      | 1.42-19.65          | Super-region |
| <b>Micronesia (Fed. States of)</b>      | 44.15 | 10.36-143.77 | 14.79     | 3.47-48.15          | Super-region |
| <b>Papua New Guinea</b>                 | 44.15 | 10.36-143.77 | 1064.86   | 249.87-3467.61      | Super-region |
| <b>Samoa</b>                            | 44.15 | 10.36-143.77 | 22.48     | 5.28-73.21          | Super-region |
| <b>Solomon Islands</b>                  | 44.15 | 10.36-143.77 | 75.31     | 17.67-245.25        | Super-region |
| <b>Tonga</b>                            | 44.15 | 10.36-143.77 | 13.08     | 3.07-42.59          | Super-region |
| <b>Vanuatu</b>                          | 44.15 | 10.36-143.77 | 35.4      | 8.31-115.27         | Super-region |
| <b>Sub-Saharan Africa</b>               | 38.81 | 14.13-97.87  | 1012437.7 | 368725.63-2554470.8 | SUPER-REGION |
| <b>Sub-Saharan Africa, central</b>      | 38.81 | 14.13-97.87  | 1012437.7 | 368725.63-2554470.8 | REGION       |
| <b>Angola</b>                           | 38.81 | 14.13-97.87  | 2807.75   | 1022.25-7080.51     | Global       |
| <b>Central African Republic</b>         | 38.81 | 14.13-97.87  | 423.85    | 154.32-1068.85      | Global       |
| <b>Congo</b>                            | 38.81 | 14.13-97.87  | 523.19    | 190.49-1319.38      | Global       |
| <b>Democratic Republic of the Congo</b> | 38.81 | 14.13-97.87  | 7688.49   | 2799.23-19388.61    | Global       |
| <b>Equatorial Guinea</b>                | 38.81 | 14.13-97.87  | 119.64    | 43.56-301.7         | Global       |
| <b>Gabon</b>                            | 38.81 | 14.13-97.87  | 227.38    | 82.79-573.41        | Global       |
| <b>Sub-Saharan Africa, eastern</b>      | 38.81 | 14.13-97.87  | 1012437.7 | 368725.63-2554470.8 | REGION       |
| <b>Burundi</b>                          | 38.81 | 14.13-97.87  | 1052.71   | 383.27-2654.7       | Global       |
| <b>Comoros</b>                          | 38.81 | 14.13-97.87  | 85.48     | 31.12-215.57        | Global       |
| <b>Djibouti</b>                         | 38.81 | 14.13-97.87  | 112.83    | 41.08-284.53        | Global       |
| <b>Eritrea</b>                          | 38.81 | 14.13-97.87  | 338.35    | 123.19-853.24       | Global       |
| <b>Ethiopia</b>                         | 38.81 | 14.13-97.87  | 11007.69  | 4007.7-27758.89     | Global       |
| <b>Kenya</b>                            | 38.81 | 14.13-97.87  | 5346.37   | 1946.51-13482.33    | Global       |
| <b>Madagascar</b>                       | 38.81 | 14.13-97.87  | 2669.88   | 972.05-6732.82      | Global       |
| <b>Malawi</b>                           | 38.81 | 14.13-97.87  | 1757.56   | 639.89-4432.16      | Global       |
| <b>Mozambique</b>                       | 38.81 | 14.13-97.87  | 2879.42   | 1048.34-7261.24     | Global       |
| <b>Rwanda</b>                           | 38.81 | 14.13-97.87  | 1302.8    | 474.32-3285.35      | Global       |
| <b>Somalia</b>                          | 38.81 | 14.13-97.87  | 1327.62   | 483.36-3347.96      | Global       |
| <b>South Sudan</b>                      | 38.81 | 14.13-97.87  | 1052.34   | 383.14-2653.77      | Global       |
| <b>Uganda</b>                           | 38.81 | 14.13-97.87  | 3937.17   | 1433.45-9928.65     | Global       |
| <b>United Republic of Tanzania</b>      | 38.81 | 14.13-97.87  | 5367.13   | 1954.07-13534.68    | Global       |
| <b>Zambia</b>                           | 38.81 | 14.13-97.87  | 1634.95   | 595.26-4122.98      | Global       |
| <b>Sub-Saharan Africa, southern</b>     | 38.81 | 14.13-97.87  | 1012437.7 | 368725.63-2554470.8 | REGION       |
| <b>Botswana</b>                         | 38.81 | 14.13-97.87  | 276.64    | 100.72-697.63       | Global       |
| <b>Lesotho</b>                          | 38.81 | 14.13-97.87  | 245.22    | 89.28-618.4         | Global       |
| <b>Namibia</b>                          | 38.81 | 14.13-97.87  | 278.69    | 101.47-702.79       | Global       |
| <b>South Africa</b>                     | 38.81 | 14.13-97.87  | 7454.32   | 2713.98-18798.09    | Global       |
| <b>Eswatini</b>                         | 38.81 | 14.13-97.87  | 120.4     | 43.84-303.62        | Global       |
| <b>Zimbabwe</b>                         | 38.81 | 14.13-97.87  | 1492.73   | 543.48-3764.34      | Global       |
| <b>Sub-Saharan Africa, western</b>      | 38.81 | 14.13-97.87  | 1012437.7 | 368725.63-2554470.8 | REGION       |
| <b>Benin</b>                            | 38.81 | 14.13-97.87  | 1135.39   | 413.38-2863.21      | Global       |
| <b>Burkina Faso</b>                     | 38.81 | 14.13-97.87  | 1852.31   | 674.39-4671.1       | Global       |
| <b>Cote d'Ivoire</b>                    | 38.81 | 14.13-97.87  | 2397.73   | 872.97-6046.54      | Global       |
| <b>Cameroon</b>                         | 38.81 | 14.13-97.87  | 2450.72   | 892.26-6180.17      | Global       |
| <b>Cabo Verde</b>                       | 38.81 | 14.13-97.87  | 68.07     | 24.78-171.66        | Global       |
| <b>Chad</b>                             | 38.81 | 14.13-97.87  | 1357.77   | 494.34-3423.99      | Global       |
| <b>Gambia</b>                           | 38.81 | 14.13-97.87  | 218.79    | 79.66-551.73        | Global       |

|                              |       |             |          |                  |        |
|------------------------------|-------|-------------|----------|------------------|--------|
| <b>Ghana</b>                 | 38.81 | 14.13-97.87 | 3159.88  | 1150.45-7968.49  | Global |
| <b>Guinea</b>                | 38.81 | 14.13-97.87 | 1251.35  | 455.59-3155.61   | Global |
| <b>Guinea-Bissau</b>         | 38.81 | 14.13-97.87 | 190.92   | 69.51-481.46     | Global |
| <b>Liberia</b>               | 38.81 | 14.13-97.87 | 482.39   | 175.63-1216.47   | Global |
| <b>Mali</b>                  | 38.81 | 14.13-97.87 | 1675.31  | 609.95-4224.76   | Global |
| <b>Mauritania</b>            | 38.81 | 14.13-97.87 | 456.05   | 166.04-1150.06   | Global |
| <b>Niger</b>                 | 38.81 | 14.13-97.87 | 1876.73  | 683.28-4732.68   | Global |
| <b>Nigeria</b>               | 38.81 | 14.13-97.87 | 18275.73 | 6653.85-46087.24 | Global |
| <b>Sao Tome and Principe</b> | 38.81 | 14.13-97.87 | 20.12    | 7.33-50.74       | Global |
| <b>Senegal</b>               | 38.81 | 14.13-97.87 | 1622.3   | 590.65-4091.07   | Global |
| <b>Sierra Leone</b>          | 38.81 | 14.13-97.87 | 758.31   | 276.09-1912.3    | Global |
| <b>Togo</b>                  | 38.81 | 14.13-97.87 | 791.18   | 288.05-1995.18   | Global |
